# Supplementary material for: Revelation of candidate genes and molecular mechanism of reproductive seasonality in carp fish (Labeo rohita Ham) by RNA sequencing
Source: Research Square preprint supplement (doi:10.21203/rs.3.rs-118092/v1), 2020-12-10
Supplement: Supplementary file 1 [file 9cff0e2a92a7464ea7b021a4.xlsx]

## Sheet: Title and Author details
Revelation of candidate genes and molecular mechanism of reproductive seasonality in carp fish (Labeo rohita Ham) by RNA sequencing
Sarika Jaiswal1#, Samiran Nandi2#*, Mir Asif Iquebal1, Rahul Singh Jasrotia1, Sunita Patra2, Gayatri Mishra2, Uday Kumar Udit2, Dinesh Kumar Sahu2, U.B. Angadi1, Prem Kumar Meher2, Padmanav Routray2, Jitendra Kumar Sundaray2, Dhananjay Kumar Verma2, Paramananda Das2, Pallipuram Jayasankar2, Anil Rai1 and Dinesh Kumar1*
1Centre for Agricultural Bioinformatics, ICAR-Indian Agricultural Statistics Research Institute, New Delhi
2ICAR- Central Institute of Freshwater Aquaculture, Bhubaneswar, Odhisa
*Joint Corresponding Author
Dinesh Kumar (dinesh.kumar@icar.gov.in); Samiran Nandi (eurekhain@yahoo.co.in)
#Authors Contributed Equally

## Sheet: IGA(BR) vs. PSR(BR)
Supplementary file 6: MiRNA targets identified from BPGL differential expressed genes
miRBase ID	Unigene ID	Tot Score	Tot Energy	Max Score	Max Energy	Strand	Len1	Len2
dre-let-7a	c142611_g1_i1	1037	-139.24	162	-24.11	1613314	22	18600
dre-let-7a	c143550_g1_i1	1067	-135.41	166	-22.37	1647233	22	7488
dre-let-7b	c141035_g1_i5	1175	-159.41	166	-22.64	1657389	22	15889
dre-let-7b	c141035_g1_i3	1175	-159.41	166	-22.64	1672848	22	15931
dre-let-7b	c143550_g1_i1	1217	-164.6	174	-26.28	1683073	22	7488
dre-let-7c-5p	c143550_g1_i1	1079	-142.81	166	-25.31	1718913	22	7488
dre-let-7d-5p	c141035_g1_i5	1020	-130.27	158	-21.84	1764909	22	15889
dre-let-7d-5p	c141035_g1_i3	1020	-130.27	158	-21.84	1780368	22	15931
dre-let-7d-5p	c132617_g7_i1	1135	-166.08	144	-22.51	1759358	22	1232
dre-let-7d-5p	c143550_g1_i1	1198	-158.31	166	-23.09	1790593	22	7488
dre-let-7e	c139626_g1_i1	1443	-173.37	154	-19.2	1860999	22	9791
dre-let-7g	c143550_g1_i1	1067	-134.14	174	-22.65	1933953	22	7488
dre-let-7h	c143550_g1_i1	1083	-138.81	172	-25.1	1969793	22	7488
dre-let-7i	c141035_g1_i5	1169	-169.07	152	-28.9	1979949	22	15889
dre-let-7i	c141035_g1_i3	1169	-169.07	152	-28.9	1995408	22	15931
dre-let-7i	c143550_g1_i1	1346	-177.54	180	-26.88	2005633	22	7488
dre-miR-101b	c117827_g2_i1	1043	-124.32	155	-23.83	5044215	22	3228
dre-miR-103	c143992_g1_i5	1019	-139.57	152	-25.35	5083133	23	16784
dre-miR-103	c141035_g1_i5	1029	-123.96	156	-21.62	5062189	23	15889
dre-miR-103	c141035_g1_i3	1029	-123.96	156	-21.62	5077648	23	15931
dre-miR-103	c48353_g1_i1	1033	-121.22	157	-22.55	5080496	23	2727
dre-miR-103	c139264_g1_i1	1042	-114.83	156	-17.56	5068974	23	14411
dre-miR-103	c129741_g2_i1	1046	-128.22	160	-22.42	5068277	23	5280
dre-miR-103	c129741_g2_i3	1046	-128.22	160	-22.42	5074121	23	5343
dre-miR-103	c141455_g1_i4	1053	-142.2	161	-23.4	5057474	23	7105
dre-miR-103	c143992_g1_i7	1307	-186.98	152	-25.35	5077433	23	17464
dre-miR-103	c143674_g1_i2	1642	-236.81	175	-30.09	5069206	23	19154
dre-miR-107a-3p	c109375_g1_i2	1011	-127.21	152	-20.97	5131602	23	6834
dre-miR-107a-3p	c143992_g1_i5	1019	-137.98	152	-25.08	5154813	23	16784
dre-miR-107a-3p	c141035_g1_i5	1029	-130.7	156	-23.49	5133869	23	15889
dre-miR-107a-3p	c141035_g1_i3	1029	-130.7	156	-23.49	5149328	23	15931
dre-miR-107a-3p	c48353_g1_i1	1033	-120.89	157	-20.44	5152176	23	2727
dre-miR-107a-3p	c141455_g1_i4	1053	-138.09	161	-21.78	5129154	23	7105
dre-miR-107a-3p	c139264_g1_i1	1189	-133.59	156	-18.67	5140654	23	14411
dre-miR-107a-3p	c143992_g1_i7	1307	-185.87	152	-25.08	5149113	23	17464
dre-miR-107a-3p	c143674_g1_i2	1642	-230.42	175	-26.72	5140886	23	19154
dre-miR-107a-5p	c139839_g1_i1	1005	-123.92	148	-19.87	5104504	23	10335
dre-miR-107a-5p	c140549_g1_i2	1013	-121.55	156	-21.45	5124043	23	13250
dre-miR-107a-5p	c143756_g3_i1	1015	-133.2	155	-23.03	5106175	23	2968
dre-miR-107a-5p	c143487_g1_i2	1015	-125.36	153	-22.01	5110067	23	11399
dre-miR-107a-5p	c135287_g1_i1	1018	-116.41	151	-25.02	5103307	23	5268
dre-miR-107a-5p	c135511_g1_i2	1019	-119.82	160	-21.41	5103579	23	5647
dre-miR-107a-5p	c141777_g2_i1	1022	-130.86	154	-22.21	5113317	23	12228
dre-miR-107a-5p	c136599_g3_i6	1025	-121.69	154	-19.87	5093093	23	5286
dre-miR-107a-5p	c136599_g3_i3	1025	-121.69	154	-19.87	5108191	23	5304
dre-miR-107a-5p	c117816_g1_i1	1031	-131.87	159	-25.46	5104823	23	4024
dre-miR-107a-5p	c130048_g1_i1	1035	-119.46	161	-24.79	5109622	23	2724
dre-miR-107a-5p	c143403_g1_i3	1036	-123.44	158	-20.85	5115901	23	14226
dre-miR-107a-5p	c141254_g1_i2	1037	-115.17	168	-20.06	5113358	23	5233
dre-miR-107a-5p	c135086_g1_i3	1038	-134.64	163	-24.86	5096162	23	4749
dre-miR-107a-5p	c140172_g3_i3	1040	-123.03	161	-20.51	5120117	23	5956
dre-miR-107a-5p	c138377_g1_i4	1041	-132.95	162	-24.33	5118745	23	5782
dre-miR-107a-5p	c140044_g3_i16	1044	-122.46	165	-22.62	5117810	23	13669
dre-miR-107a-5p	c140860_g1_i4	1046	-128.57	156	-21.57	5103410	23	16160
dre-miR-107a-5p	c129117_g1_i1	1049	-120.06	163	-20.41	5101469	23	7172
dre-miR-107a-5p	c138922_g1_i2	1051	-129.66	161	-23.74	5102237	23	7960
dre-miR-107a-5p	c138922_g1_i1	1051	-129.66	161	-23.74	5123008	23	7810
dre-miR-107a-5p	c139534_g1_i2	1053	-130.13	157	-22.69	5107994	23	7915
dre-miR-107a-5p	c139534_g1_i1	1053	-130.13	157	-22.69	5115231	23	7923
dre-miR-107a-5p	c142692_g1_i1	1058	-128.32	163	-22.91	5119334	23	9105
dre-miR-107a-5p	c137680_g1_i2	1063	-133.22	171	-24.11	5114288	23	7536
dre-miR-107a-5p	c142807_g1_i1	1143	-135.17	149	-19.65	5097765	23	5207
dre-miR-107a-5p	c140969_g1_i3	1167	-142.9	151	-24.3	5089950	23	12599
dre-miR-107a-5p	c107108_g1_i2	1180	-141.26	155	-21.44	5106648	23	3886
dre-miR-107a-5p	c107108_g1_i4	1180	-141.26	155	-21.44	5107879	23	3787
dre-miR-107a-5p	c107108_g1_i1	1180	-141.26	155	-21.44	5119382	23	3957
dre-miR-107a-5p	c107108_g1_i5	1180	-141.26	155	-21.44	5119977	23	3742
dre-miR-107a-5p	c133283_g1_i1	1182	-147.4	165	-23.42	5112656	23	5447
dre-miR-107a-5p	c109438_g1_i1	1185	-143.27	164	-30.97	5113577	23	4255
dre-miR-107a-5p	c132376_g1_i4	1187	-137.73	158	-24.94	5096901	23	4903
dre-miR-107a-5p	c122270_g1_i1	1217	-140.76	165	-20.25	5102796	23	6765
dre-miR-107a-5p	c140044_g3_i3	1236	-151.24	168	-24.63	5089731	23	13083
dre-miR-107a-5p	c140044_g3_i12	1236	-151.24	168	-24.63	5096853	23	12335
dre-miR-107a-5p	c140044_g3_i5	1236	-151.24	168	-24.63	5104898	23	13353
dre-miR-107a-5p	c143992_g1_i5	1321	-182	157	-23.35	5118973	23	16784
dre-miR-107a-5p	c132897_g1_i1	1322	-159.19	160	-25.32	5115840	23	8280
dre-miR-107a-5p	c143992_g1_i7	1325	-167.83	157	-23.06	5113273	23	17464
dre-miR-107a-5p	c114553_g1_i1	1332	-178.03	165	-31.11	5105535	23	5122
dre-miR-107a-5p	c142264_g1_i1	1346	-174.85	156	-26.8	5102893	23	7215
dre-miR-107a-5p	c142264_g1_i2	1346	-174.85	156	-26.8	5117319	23	7395
dre-miR-107a-5p	c141326_g1_i7	1359	-154.26	166	-22.17	5123428	23	5923
dre-miR-107a-5p	c142147_g1_i7	1386	-165	161	-22.29	5090609	23	18936
dre-miR-107a-5p	c140987_g1_i4	1613	-215.47	158	-28.59	5116089	23	16713
dre-miR-107a-5p	c140987_g1_i1	1613	-215.47	158	-28.59	5122566	23	15839
dre-miR-107a-5p	c141035_g1_i5	1629	-197.83	156	-27.31	5098029	23	15889
dre-miR-107a-5p	c141035_g1_i3	1629	-197.83	156	-27.31	5113488	23	15931
dre-miR-107a-5p	c133560_g1_i2	1641	-203.99	163	-22.73	5102993	23	14202
dre-miR-107a-5p	c133560_g1_i3	1641	-203.99	163	-22.73	5116983	23	14693
dre-miR-107a-5p	c144604_g3_i4	1743	-205.26	159	-20.72	5112655	23	7294
dre-miR-107a-5p	c135951_g2_i5	1793	-209.38	162	-19.39	5094591	23	7874
dre-miR-107a-5p	c140676_g2_i6	1828	-212.57	167	-23.88	5113439	23	7798
dre-miR-107a-5p	c136961_g1_i1	2218	-248.97	159	-23.49	5123530	23	7357
dre-miR-107a-5p	c139264_g1_i1	2678	-323.19	163	-22.18	5104814	23	14411
dre-miR-107b	c141035_g1_i5	1025	-123.65	154	-22.56	11585069	21	15889
dre-miR-107b	c141035_g1_i3	1025	-123.65	154	-22.56	11600528	21	15931
dre-miR-107b	c48353_g1_i1	1026	-121.8	157	-21.87	11603376	21	2727
dre-miR-107b	c143992_g1_i7	1162	-164.39	152	-25.05	11600313	21	17464
dre-miR-107b	c139264_g1_i1	1179	-128.41	154	-18.89	11591854	21	14411
dre-miR-107b	c141455_g1_i4	1196	-149.28	157	-21.95	11580354	21	7105
dre-miR-107b	c143674_g1_i2	1335	-184.07	175	-26.04	11592086	21	19154
dre-miR-10a-5p	c140568_g1_i1	1016	-134.15	151	-24.93	84122	22	6757
dre-miR-10a-5p	c140568_g1_i4	1016	-134.15	151	-24.93	88723	22	7005
dre-miR-10a-5p	c140568_g1_i8	1016	-134.15	151	-24.93	104527	22	6793
dre-miR-10b-3p	c128319_g1_i2	1000	-157.73	146	-25.38	190190	22	3237
dre-miR-10c-5p	c140568_g1_i1	1188	-170.95	157	-24.59	2234522	22	6757
dre-miR-10c-5p	c140568_g1_i4	1188	-170.95	157	-24.59	2239123	22	7005
dre-miR-10c-5p	c140568_g1_i8	1188	-170.95	157	-24.59	2254927	22	6793
dre-miR-122	c133547_g3_i4	1013	-126.68	159	-21.77	5170868	22	8385
dre-miR-122	c140635_g1_i2	1063	-152.68	170	-27.4	5177773	22	11985
dre-miR-122	c138655_g1_i2	1184	-146.62	158	-23.25	5194537	22	4502
dre-miR-122	c138655_g1_i4	1333	-165.39	158	-23.25	5165780	22	4407
dre-miR-122	c138655_g1_i3	1333	-165.39	158	-23.25	5179855	22	4646
dre-miR-122	c138655_g1_i1	1333	-165.39	158	-23.25	5188291	22	4634
dre-miR-122	c139457_g2_i7	1446	-186.92	155	-25.05	5165229	22	15103
dre-miR-122	c144412_g1_i1	1946	-282.3	158	-27.48	5191896	22	5684
dre-miR-124-6-5p	c140549_g1_i2	1035	-136.3	154	-24.23	5339083	22	13250
dre-miR-124-6-5p	c143992_g1_i7	1175	-163.24	156	-25.45	5328313	22	17464
dre-miR-125a	c142238_g2_i1	1017	-137.88	155	-24.48	5367870	22	15561
dre-miR-125a	c82755_g1_i1	1052	-163.99	158	-29.55	5341836	22	3795
dre-miR-125b-2-3p	c141978_g1_i2	1016	-179.86	150	-33.77	5474705	21	6077
dre-miR-125b-2-3p	c142238_g2_i1	1023	-147.81	153	-26.19	5475390	21	15561
dre-miR-125b-2-3p	c140374_g1_i5	1347	-233.21	160	-35.85	5481155	21	12507
dre-miR-125b-5p	c138907_g1_i4	1041	-168.48	162	-28.48	5382918	22	12870
dre-miR-125b-5p	c138907_g1_i2	1041	-168.48	162	-28.48	5387199	22	12913
dre-miR-125b-5p	c138907_g1_i3	1041	-168.48	162	-28.48	5389009	22	12903
dre-miR-125b-5p	c138907_g1_i1	1041	-168.48	162	-28.48	5408984	22	12957
dre-miR-125c-3p	c143674_g1_i2	1169	-189.03	154	-31.34	5570966	22	19154
dre-miR-125c-5p	c138907_g1_i4	1026	-158.14	155	-27.17	5526278	22	12870
dre-miR-125c-5p	c138907_g1_i2	1026	-158.14	155	-27.17	5530559	22	12913
dre-miR-125c-5p	c138907_g1_i3	1026	-158.14	155	-27.17	5532369	22	12903
dre-miR-125c-5p	c138907_g1_i1	1026	-158.14	155	-27.17	5552344	22	12957
dre-miR-128-3p	c140955_g1_i8	1016	-138.2	160	-23.69	5709282	22	14824
dre-miR-128-3p	c142459_g3_i2	1042	-148.41	153	-25.32	5706559	22	15674
dre-miR-128-3p	c142009_g1_i8	1173	-165.17	153	-25.12	5715889	22	12031
dre-miR-128-3p	c142419_g5_i1	1236	-161	162	-25.69	5727532	22	8965
dre-miR-128-3p	c121917_g1_i1	1309	-171.06	154	-22.99	5716695	22	14866
dre-miR-128-3p	c142009_g1_i5	1313	-191.77	153	-26.6	5718322	22	13098
dre-miR-128-3p	c142611_g1_i1	1323	-174.56	161	-23.42	5699074	22	18600
dre-miR-129-5p	c140468_g1_i2	1015	-129.97	154	-23.21	5739816	22	5914
dre-miR-129-5p	c138818_g2_i1	1022	-131.27	155	-26.1	5753336	22	5718
dre-miR-129-5p	c133328_g1_i2	1023	-137.72	154	-23.88	5766285	22	4742
dre-miR-129-5p	c136482_g1_i2	1049	-149.24	166	-30.13	5754757	22	2317
dre-miR-129-5p	c142147_g1_i7	1057	-149.45	164	-27.6	5735729	22	18936
dre-miR-1306	c141455_g1_i4	1035	-169	154	-30.79	12512194	22	7105
dre-miR-1306	c104641_g1_i1	1049	-181.33	159	-32.46	12510492	22	2567
dre-miR-1306	c139714_g1_i1	1058	-158.83	156	-28.33	12542305	22	16004
dre-miR-1306	c138568_g2_i7	1067	-150.92	163	-27.18	12523705	22	15529
dre-miR-1306	c138568_g2_i4	1067	-150.92	163	-27.18	12542487	22	15271
dre-miR-1306	c146271_g1_i1	1072	-168.36	167	-30.8	12514614	22	5977
dre-miR-1306	c141411_g1_i4	1198	-203.62	155	-34.39	12509470	22	3807
dre-miR-1306	c120045_g1_i2	1318	-212.6	168	-31.1	12513003	22	3042
dre-miR-1306	c99099_g1_i1	1352	-221.69	162	-33.09	12543921	22	8348
dre-miR-1306	c139264_g1_i1	1463	-190.9	160	-27.22	12523694	22	14411
dre-miR-1306	c141393_g1_i5	1486	-242.41	156	-29.09	12508887	22	6005
dre-miR-130c-3p	c143379_g1_i8	1190	-131.51	160	-19.26	5964086	22	10691
dre-miR-130c-3p	c143379_g1_i6	1190	-131.51	160	-19.26	5972019	22	10708
dre-miR-130c-5p	c135608_g1_i1	1011	-127.9	150	-24.66	5942929	22	8447
dre-miR-130c-5p	c136014_g1_i1	1030	-129.88	156	-23.23	5935480	22	15541
dre-miR-130c-5p	c105570_g1_i1	1042	-123.1	154	-22.78	5919015	22	3942
dre-miR-130c-5p	c140987_g1_i4	1056	-126.9	158	-21.69	5940409	22	16713
dre-miR-130c-5p	c137687_g3_i1	1177	-138.36	158	-19.45	5934916	22	4724
dre-miR-130c-5p	c135615_g1_i2	1225	-146.5	169	-23.49	5938419	22	11803
dre-miR-130c-5p	c137687_g3_i6	1340	-157.38	163	-19.45	5916793	22	7051
dre-miR-130c-5p	c98474_g1_i2	1363	-166.44	163	-20.72	5946128	22	3833
dre-miR-132-3p	c140374_g1_i5	1022	-139.1	158	-23.09	6054595	22	12507
dre-miR-133a-3p	c41601_g1_i1	1014	-142.99	151	-26.32	6093253	22	2863
dre-miR-133a-3p	c105570_g1_i1	1024	-146.84	155	-26.29	6098215	22	3942
dre-miR-133a-3p	c121917_g1_i1	1037	-157.32	156	-26.78	6110935	22	14866
dre-miR-133a-3p	c135615_g1_i2	1049	-146.95	160	-28.59	6117619	22	11803
dre-miR-133a-3p	c114568_g1_i2	1289	-171.55	151	-24.67	6092921	22	4976
dre-miR-133a-3p	c114568_g1_i3	1289	-171.55	151	-24.67	6105670	22	4855
dre-miR-133b-3p	c41601_g1_i1	1014	-142.99	151	-26.32	6200773	22	2863
dre-miR-133b-3p	c105570_g1_i1	1024	-146.84	155	-26.29	6205735	22	3942
dre-miR-133b-3p	c121917_g1_i1	1037	-152.12	156	-26.88	6218455	22	14866
dre-miR-133b-3p	c135615_g1_i2	1049	-143.16	160	-28.59	6225139	22	11803
dre-miR-133b-3p	c114568_g1_i2	1289	-167.03	151	-24.8	6200441	22	4976
dre-miR-133b-3p	c114568_g1_i3	1289	-167.03	151	-24.8	6213190	22	4855
dre-miR-133c-3p	c141615_g3_i2	1013	-136.95	152	-24.46	6305745	22	6386
dre-miR-133c-3p	c105570_g1_i1	1014	-144.88	155	-23.56	6277415	22	3942
dre-miR-133c-3p	c41601_g1_i1	1021	-132.4	151	-23.34	6272453	22	2863
dre-miR-133c-3p	c121917_g1_i1	1044	-156.7	161	-26.88	6290135	22	14866
dre-miR-133c-3p	c135615_g1_i2	1049	-140.66	168	-25.86	6296819	22	11803
dre-miR-133c-3p	c114568_g1_i2	1295	-165.96	151	-22.68	6272121	22	4976
dre-miR-133c-3p	c114568_g1_i3	1295	-165.96	151	-22.68	6284870	22	4855
dre-miR-135c	c135608_g1_i1	1174	-137.52	156	-19.6	6337169	22	8447
dre-miR-138-5p	c121917_g1_i1	1005	-145.58	152	-26.57	6433495	22	14866
dre-miR-138-5p	c139963_g9_i3	1010	-137.71	158	-25.22	6425229	22	5640
dre-miR-138-5p	c139963_g9_i2	1010	-137.71	158	-25.22	6442670	22	6040
dre-miR-138-5p	c135038_g2_i8	1010	-143.41	156	-24.24	6446023	22	3641
dre-miR-138-5p	c140759_g1_i2	1014	-136.16	152	-23.88	6447355	22	10438
dre-miR-138-5p	c144103_g5_i2	1016	-135.16	153	-25.79	6434817	22	8884
dre-miR-138-5p	c141666_g1_i3	1017	-137.85	155	-21.82	6445584	22	5690
dre-miR-138-5p	c142586_g4_i1	1019	-136.94	155	-23.08	6436719	22	12109
dre-miR-138-5p	c136401_g1_i3	1023	-139.85	171	-23.05	6427332	22	5999
dre-miR-138-5p	c137544_g1_i2	1030	-142.85	156	-25.95	6440479	22	4282
dre-miR-138-5p	c142875_g1_i3	1032	-142.37	165	-25.39	6445154	22	14551
dre-miR-138-5p	c139251_g1_i7	1032	-145.28	156	-24.35	6446560	22	4823
dre-miR-138-5p	c104831_g1_i1	1036	-132.59	153	-24.48	6419804	22	4286
dre-miR-138-5p	c97918_g1_i1	1037	-135.81	156	-22.56	6419607	22	3945
dre-miR-138-5p	c107914_g1_i1	1038	-141.43	152	-26.09	6434248	22	8823
dre-miR-138-5p	c140201_g2_i4	1040	-155.08	157	-25.79	6424111	22	8560
dre-miR-138-5p	c140201_g2_i7	1040	-155.08	157	-25.79	6428541	22	8778
dre-miR-138-5p	c140201_g2_i10	1040	-155.08	157	-25.79	6435409	22	8581
dre-miR-138-5p	c131733_g1_i4	1048	-147.14	166	-24.76	6426225	22	5197
dre-miR-138-5p	c137905_g1_i7	1051	-143.83	164	-24.25	6425896	22	7282
dre-miR-138-5p	c132063_g1_i2	1074	-155.25	174	-25.42	6423588	22	11216
dre-miR-138-5p	c132063_g1_i1	1074	-155.25	174	-25.42	6446615	22	11228
dre-miR-138-5p	c139264_g1_i1	1152	-160.38	152	-24.72	6430894	22	14411
dre-miR-138-5p	c129117_g1_i1	1168	-145.87	154	-20.55	6427549	22	7172
dre-miR-138-5p	c139457_g2_i7	1176	-155.63	159	-28.09	6419629	22	15103
dre-miR-138-5p	c131733_g1_i3	1190	-167.55	166	-24.76	6440205	22	5236
dre-miR-138-5p	c136306_g1_i1	1224	-144.56	161	-21.96	6421221	22	3735
dre-miR-138-5p	c144103_g5_i3	1309	-177.34	153	-25.79	6429854	22	15607
dre-miR-138-5p	c133430_g2_i2	1310	-167.23	157	-22.11	6446870	22	4448
dre-miR-138-5p	c140860_g1_i4	1316	-169.27	160	-23.45	6429490	22	16160
dre-miR-138-5p	c141921_g2_i3	1333	-184.23	153	-25.06	6450131	22	13321
dre-miR-138-5p	c142147_g1_i7	1334	-173.83	163	-24.53	6416689	22	18936
dre-miR-138-5p	c136699_g1_i8	1344	-177.22	157	-23.69	6421714	22	9257
dre-miR-138-5p	c143403_g1_i3	1356	-195.81	160	-25.23	6441981	22	14226
dre-miR-138-5p	c140635_g1_i2	1473	-201.76	168	-26.93	6432173	22	11985
dre-miR-138-5p	c142611_g1_i1	1524	-204.66	183	-35.53	6415874	22	18600
dre-miR-138-5p	c142238_g2_i1	1759	-245.5	172	-28.04	6443070	22	15561
dre-miR-138-5p	c139714_g1_i1	2043	-275.71	162	-25.24	6449505	22	16004
dre-miR-138-5p	c141321_g1_i1	2044	-301.74	157	-25.32	6415912	22	16276
dre-miR-1388-3p	c134948_g1_i1	1028	-126.53	151	-22.64	11355236	22	9142
dre-miR-1388-3p	c143674_g1_i2	1032	-129.24	158	-24.63	11341206	22	19154
dre-miR-1388-3p	c130231_g1_i2	1041	-148.01	163	-29.17	11338293	22	8350
dre-miR-1388-3p	c136699_g1_i8	1057	-138.44	160	-25.55	11331794	22	9257
dre-miR-1388-3p	c141035_g1_i5	1466	-213.87	154	-25.95	11334189	22	15889
dre-miR-1388-3p	c141035_g1_i3	1466	-213.87	154	-25.95	11349648	22	15931
dre-miR-139-3p	c137905_g1_i7	1001	-157.88	149	-27.44	10081576	23	7282
dre-miR-139-3p	c140499_g6_i7	1002	-162.62	147	-26.73	10085763	23	5879
dre-miR-139-3p	c130088_g1_i2	1004	-165.7	147	-27.97	10089816	23	2978
dre-miR-139-3p	c142433_g2_i3	1010	-185.06	154	-30.74	10071935	23	6313
dre-miR-139-3p	c142433_g2_i6	1010	-185.06	154	-30.74	10105154	23	6172
dre-miR-139-3p	c142808_g2_i7	1013	-178.7	150	-29.2	10078487	23	6244
dre-miR-139-3p	c142808_g2_i1	1013	-178.7	150	-29.2	10083572	23	5756
dre-miR-139-3p	c109743_g2_i2	1013	-174.27	152	-30.29	10088103	23	5634
dre-miR-139-3p	c136511_g1_i2	1013	-166.26	153	-27.43	10088357	23	3019
dre-miR-139-3p	c119638_g1_i1	1013	-191.77	150	-35.98	10105129	23	5285
dre-miR-139-3p	c142971_g3_i4	1015	-165.47	156	-28.36	10086312	23	15322
dre-miR-139-3p	c140044_g3_i16	1015	-152.6	154	-25.37	10099570	23	13669
dre-miR-139-3p	c140783_g7_i2	1016	-161.13	150	-26.41	10098400	23	4012
dre-miR-139-3p	c138315_g2_i4	1017	-182.72	159	-29.92	10074288	23	9454
dre-miR-139-3p	c129503_g1_i4	1017	-156.74	156	-29.14	10106807	23	4646
dre-miR-139-3p	c138478_g2_i2	1018	-179.21	161	-33.84	10082577	23	4991
dre-miR-139-3p	c139880_g1_i3	1018	-178.89	152	-31.11	10082608	23	4438
dre-miR-139-3p	c139323_g3_i2	1018	-187.48	149	-35.93	10100389	23	5534
dre-miR-139-3p	c137544_g1_i2	1020	-189.5	158	-32.66	10096159	23	4282
dre-miR-139-3p	c139821_g1_i4	1022	-194.77	155	-41.42	10078178	23	4194
dre-miR-139-3p	c139821_g1_i2	1022	-194.77	155	-41.42	10106726	23	3940
dre-miR-139-3p	c132100_g1_i5	1024	-157.52	157	-27.24	10073603	23	6141
dre-miR-139-3p	c126726_g1_i1	1024	-175.22	152	-32.31	10090035	23	7512
dre-miR-139-3p	c132100_g1_i2	1024	-157.52	157	-27.24	10093067	23	5826
dre-miR-139-3p	c141070_g1_i8	1025	-166.89	151	-28.76	10096350	23	9372
dre-miR-139-3p	c141070_g1_i13	1025	-166.89	151	-28.76	10101855	23	10507
dre-miR-139-3p	c140735_g1_i1	1028	-177.21	157	-27.66	10090313	23	15171
dre-miR-139-3p	c144151_g2_i4	1030	-170.43	153	-28.38	10095372	23	8379
dre-miR-139-3p	c140357_g2_i6	1031	-165.79	152	-26.69	10082312	23	4566
dre-miR-139-3p	c136014_g1_i1	1032	-172.52	157	-31.87	10092920	23	15541
dre-miR-139-3p	c135191_g1_i4	1033	-178.06	162	-33.2	10072342	23	11650
dre-miR-139-3p	c139457_g2_i2	1033	-186.33	156	-32.01	10074714	23	7085
dre-miR-139-3p	c135191_g1_i1	1033	-178.06	162	-33.2	10075402	23	11665
dre-miR-139-3p	c115810_g1_i2	1033	-180.55	159	-29.98	10075806	23	8947
dre-miR-139-3p	c139457_g2_i5	1033	-186.33	156	-32.01	10083298	23	7077
dre-miR-139-3p	c115810_g1_i3	1033	-180.55	159	-29.98	10088160	23	9257
dre-miR-139-3p	c130844_g1_i4	1033	-174.23	151	-31.03	10091514	23	5911
dre-miR-139-3p	c138048_g1_i5	1034	-166.03	161	-29.14	10073355	23	5850
dre-miR-139-3p	c132152_g1_i1	1038	-189.63	157	-29.71	10085719	23	6362
dre-miR-139-3p	c139118_g1_i1	1041	-185.3	161	-30.11	10091433	23	4702
dre-miR-139-3p	c140958_g2_i1	1041	-184.76	169	-32.85	10095561	23	6040
dre-miR-139-3p	c140958_g2_i2	1041	-184.76	169	-32.85	10097441	23	6474
dre-miR-139-3p	c138630_g1_i3	1043	-180.57	162	-31.04	10081507	23	3265
dre-miR-139-3p	c138630_g1_i1	1043	-180.57	162	-31.04	10088387	23	3294
dre-miR-139-3p	c143604_g1_i3	1043	-164.18	154	-27.69	10099664	23	4924
dre-miR-139-3p	c134899_g2_i2	1046	-165.74	167	-30.39	10081112	23	8129
dre-miR-139-3p	c134899_g2_i1	1046	-165.74	167	-30.39	10092184	23	8392
dre-miR-139-3p	c117508_g1_i1	1046	-160.16	161	-28.27	10101326	23	3641
dre-miR-139-3p	c66514_g1_i1	1052	-191.82	158	-34.33	10079283	23	1861
dre-miR-139-3p	c129810_g1_i2	1056	-172.26	165	-32.32	10081446	23	6172
dre-miR-139-3p	c129810_g1_i6	1056	-172.26	165	-32.32	10093765	23	6022
dre-miR-139-3p	c121917_g1_i1	1082	-184.1	166	-30.22	10089175	23	14866
dre-miR-139-3p	c137365_g1_i8	1144	-185.37	150	-25.47	10098530	23	5573
dre-miR-139-3p	c142343_g7_i2	1146	-185.06	149	-31.24	10072782	23	3758
dre-miR-139-3p	c140658_g2_i1	1148	-192.4	147	-30.18	10100598	23	3762
dre-miR-139-3p	c143550_g1_i1	1161	-190.63	151	-28.32	10105473	23	7488
dre-miR-139-3p	c121731_g1_i1	1164	-183.09	156	-29.05	10074286	23	3034
dre-miR-139-3p	c142611_g1_i1	1171	-200.67	152	-30.64	10071554	23	18600
dre-miR-139-3p	c132944_g2_i3	1174	-223.3	156	-31.9	10077861	23	3634
dre-miR-139-3p	c132944_g2_i1	1174	-221.46	156	-31.9	10098980	23	6536
dre-miR-139-3p	c9179_g1_i1	1182	-191.41	159	-33.14	10092828	23	1749
dre-miR-139-3p	c122665_g1_i2	1183	-203.71	163	-31.85	10075800	23	5786
dre-miR-139-3p	c108321_g1_i2	1184	-202.5	163	-28.24	10082265	23	4328
dre-miR-139-3p	c140585_g1_i3	1184	-210.16	164	-32.05	10086702	23	12911
dre-miR-139-3p	c108321_g1_i1	1184	-202.5	163	-28.24	10095029	23	4292
dre-miR-139-3p	c140987_g1_i4	1189	-206.25	161	-30.68	10097849	23	16713
dre-miR-139-3p	c140987_g1_i1	1189	-206.25	161	-30.68	10104326	23	15839
dre-miR-139-3p	c137875_g4_i1	1194	-203.09	161	-33.65	10084664	23	7649
dre-miR-139-3p	c137875_g4_i3	1194	-203.09	161	-33.65	10096867	23	7634
dre-miR-139-3p	c137875_g4_i2	1194	-203.09	161	-33.65	10102132	23	7661
dre-miR-139-3p	c129810_g1_i5	1198	-195.83	165	-32.32	10072006	23	7008
dre-miR-139-3p	c140562_g1_i1	1204	-211.57	166	-35.08	10094656	23	7019
dre-miR-139-3p	c135029_g2_i3	1208	-202.79	159	-30.62	10072956	23	9934
dre-miR-139-3p	c138045_g1_i6	1211	-207.29	166	-34.19	10089449	23	9495
dre-miR-139-3p	c138045_g1_i4	1211	-207.29	166	-34.19	10101459	23	9519
dre-miR-139-3p	c140044_g3_i3	1224	-200.16	167	-29.85	10071491	23	13083
dre-miR-139-3p	c140044_g3_i12	1224	-200.16	167	-29.85	10078613	23	12335
dre-miR-139-3p	c140044_g3_i5	1224	-200.16	167	-29.85	10086658	23	13353
dre-miR-139-3p	c132484_g1_i8	1288	-205.51	149	-25.8	10102133	23	6736
dre-miR-139-3p	c141285_g1_i4	1309	-204.29	154	-27.79	10081468	23	5069
dre-miR-139-3p	c141285_g1_i5	1309	-204.29	154	-27.79	10104953	23	4838
dre-miR-139-3p	c132944_g2_i2	1318	-248.29	156	-31.9	10075893	23	7002
dre-miR-139-3p	c143604_g1_i5	1331	-225.61	154	-31.72	10072094	23	5935
dre-miR-139-3p	c143604_g1_i2	1331	-225.61	154	-31.72	10093681	23	6030
dre-miR-139-3p	c142125_g4_i2	1335	-233.71	156	-30.43	10075518	23	9433
dre-miR-139-3p	c142125_g4_i3	1335	-233.71	156	-30.43	10086514	23	9400
dre-miR-139-3p	c142125_g4_i1	1335	-233.71	156	-30.43	10090068	23	9436
dre-miR-139-3p	c138756_g1_i4	1368	-227.53	164	-29.8	10090353	23	7984
dre-miR-139-3p	c132484_g1_i7	1428	-232.54	149	-27.03	10071864	23	6721
dre-miR-139-3p	c132484_g1_i1	1428	-232.54	149	-27.03	10080509	23	6823
dre-miR-139-3p	c132484_g1_i4	1428	-232.54	149	-27.03	10086765	23	7753
dre-miR-139-3p	c132484_g1_i2	1438	-232.08	150	-26.57	10094420	23	6784
dre-miR-139-3p	c134730_g1_i3	1450	-246.55	151	-38.42	10089268	23	8703
dre-miR-139-3p	c134730_g1_i4	1450	-246.55	151	-38.42	10095313	23	8489
dre-miR-139-3p	c142586_g3_i3	1459	-263.72	164	-36.12	10105123	23	11115
dre-miR-139-3p	c105358_g1_i2	1476	-233.15	157	-28.07	10092194	23	6022
dre-miR-139-3p	c142350_g1_i5	1485	-259.2	156	-34.58	10083042	23	7656
dre-miR-139-3p	c142350_g1_i1	1485	-259.2	156	-34.58	10098793	23	7999
dre-miR-139-3p	c139201_g1_i2	1487	-255.05	161	-29.17	10091643	23	10577
dre-miR-139-3p	c137464_g1_i1	1592	-240.57	154	-27.71	10079331	23	5480
dre-miR-139-3p	c140017_g1_i3	1593	-289.02	158	-31.77	10093066	23	7270
dre-miR-139-3p	c140969_g1_i3	1628	-269.26	165	-29.69	10071710	23	12599
dre-miR-139-3p	c142808_g2_i8	1732	-297.3	152	-31	10074869	23	13201
dre-miR-139-3p	c129018_g1_i1	1887	-346.18	157	-30.77	10093437	23	7381
dre-miR-139-3p	c141321_g1_i1	1891	-317.72	153	-27.61	10071592	23	16276
dre-miR-139-3p	c136968_g5_i6	1906	-336.97	157	-30.9	10073288	23	9167
dre-miR-139-3p	c136968_g5_i7	1906	-336.97	157	-30.9	10095195	23	9480
dre-miR-139-3p	c140635_g1_i2	1913	-334.05	155	-32.91	10087853	23	11985
dre-miR-139-3p	c143674_g1_i2	2061	-351.75	158	-30.62	10086806	23	19154
dre-miR-139-3p	c139457_g2_i7	2070	-355.17	156	-35.01	10075309	23	15103
dre-miR-139-3p	c134876_g1_i2	2183	-370.65	155	-29.75	10078303	23	10150
dre-miR-139-3p	c140017_g1_i5	2300	-404.96	158	-31.77	10087110	23	8708
dre-miR-139-3p	c138488_g3_i2	2353	-388.15	156	-33.11	10074134	23	6267
dre-miR-140-3p	c144103_g5_i3	1039	-141.44	158	-22.36	6537374	23	15607
dre-miR-140-3p	c114279_g2_i2	1055	-160.34	163	-24.65	6538671	23	4979
dre-miR-140-3p	c114279_g2_i1	1055	-160.34	163	-24.65	6552824	23	4858
dre-miR-141-3p	c142009_g1_i8	1073	-124.32	158	-21.07	6611889	22	12031
dre-miR-141-3p	c142009_g1_i5	1223	-142.36	158	-21.07	6614322	22	13098
dre-miR-143	c142219_g2_i5	1025	-128.88	159	-21.51	6766076	21	8992
dre-miR-143	c142219_g2_i6	1025	-128.88	159	-21.51	6770345	21	9085
dre-miR-143	c135029_g2_i3	1055	-120.58	158	-19.86	6739836	21	9934
dre-miR-143	c131607_g1_i1	1902	-219.53	170	-24.39	6765047	21	8280
dre-miR-145-5p	c142875_g1_i3	1013	-143.23	149	-23.7	6875234	22	14551
dre-miR-145-5p	c144165_g1_i7	1020	-135.52	156	-25.55	6850771	22	15611
dre-miR-145-5p	c144165_g1_i8	1020	-135.52	156	-25.55	6855636	22	15638
dre-miR-145-5p	c144165_g1_i4	1020	-135.52	156	-25.55	6876280	22	15499
dre-miR-145-5p	c139695_g4_i2	1035	-132.1	163	-20.27	6854627	22	3392
dre-miR-145-5p	c139695_g4_i6	1035	-132.1	163	-20.27	6868119	22	4757
dre-miR-145-5p	c135615_g1_i2	1037	-159.68	164	-28.23	6870259	22	11803
dre-miR-145-5p	c142459_g3_i2	1060	-152.67	159	-25.91	6853439	22	15674
dre-miR-145-5p	c140860_g1_i4	1338	-169.22	162	-23.05	6859570	22	16160
dre-miR-145-5p	c142147_g1_i7	1455	-213.7	160	-32.5	6846769	22	18936
dre-miR-145-5p	c133560_g1_i2	1656	-188.8	163	-21	6859153	22	14202
dre-miR-145-5p	c133560_g1_i3	1799	-216.37	163	-27.57	6873143	22	14693
dre-miR-145-5p	c143992_g1_i7	1922	-254.8	157	-26.1	6869433	22	17464
dre-miR-145-5p	c143992_g1_i5	2080	-277.15	166	-26.1	6875133	22	16784
dre-miR-146a	c135459_g2_i2	1029	-124.45	158	-19.83	6918771	23	7879
dre-miR-146a	c135459_g2_i4	1029	-124.45	158	-19.83	6930175	23	7852
dre-miR-146a	c135459_g2_i1	1029	-124.45	158	-19.83	6946715	23	7912
dre-miR-146a	c139626_g1_i1	1341	-150.9	164	-20.34	6950279	23	9791
dre-miR-146a	c131607_g1_i1	1494	-177.97	161	-22.9	6944247	23	8280
dre-miR-146b	c131607_g1_i1	1231	-151.21	163	-22.29	6980087	22	8280
dre-miR-146b	c139626_g1_i1	1768	-197.81	157	-21.65	6986119	22	9791
dre-miR-148	c132253_g1_i2	1032	-110.98	151	-17.98	7007511	22	7307
dre-miR-152	c140164_g1_i2	1000	-120.11	147	-20.89	7081283	22	8312
dre-miR-152	c142506_g1_i17	1028	-128.41	154	-23.68	7061544	22	6398
dre-miR-152	c142611_g1_i1	1040	-124.79	160	-19.96	7060994	22	18600
dre-miR-152	c140164_g1_i4	1141	-140.9	147	-20.89	7083131	22	8290
dre-miR-152	c143674_g1_i2	1189	-150.87	158	-25.55	7076246	22	19154
dre-miR-153a-5p	c138568_g2_i7	1014	-120.23	155	-19.92	7183545	23	15529
dre-miR-153a-5p	c138568_g2_i4	1014	-120.23	155	-19.92	7202327	23	15271
dre-miR-153a-5p	c140044_g3_i3	1017	-124.98	149	-23.17	7168451	23	13083
dre-miR-153a-5p	c140044_g3_i12	1017	-124.98	149	-23.17	7175573	23	12335
dre-miR-153a-5p	c142147_g1_i7	1029	-118.81	158	-18.93	7169329	23	18936
dre-miR-153a-5p	c135885_g4_i7	1031	-118.06	155	-20.37	7180397	23	9915
dre-miR-153a-5p	c138876_g1_i7	1032	-122	160	-19.82	7186697	23	6027
dre-miR-153a-5p	c144003_g4_i3	1036	-109.42	163	-19.3	7183219	23	15167
dre-miR-153a-5p	c108690_g1_i1	1046	-105.71	156	-16.31	7181199	23	2449
dre-miR-153a-5p	c135608_g1_i1	1069	-117.26	164	-20.5	7197329	23	8447
dre-miR-153a-5p	c136489_g2_i2	1074	-116.15	170	-18.28	7195790	23	4241
dre-miR-153a-5p	c132897_g1_i1	1211	-141.53	183	-25.78	7194560	23	8280
dre-miR-153a-5p	c132733_g1_i2	1219	-152.66	181	-26.81	7177916	23	7259
dre-miR-153b-5p	c140738_g1_i1	1176	-140.35	159	-22.61	7097164	22	11166
dre-miR-153b-5p	c137630_g1_i1	1215	-144.04	164	-24.97	7103520	22	3104
dre-miR-153b-5p	c137630_g1_i4	1215	-144.04	164	-24.97	7113087	22	3324
dre-miR-153b-5p	c143138_g1_i1	1327	-153.37	164	-21.33	7114969	22	5027
dre-miR-153b-5p	c105929_g1_i4	1328	-161.42	157	-22.83	7125251	22	10601
dre-miR-153b-5p	c132897_g1_i1	2094	-227.21	168	-19.39	7122880	22	8280
dre-miR-153c-5p	c132897_g1_i1	1201	-134.92	172	-21.64	7266240	22	8280
dre-miR-15a-5p	c125931_g1_i1	1007	-113.03	148	-19.44	2370220	22	4243
dre-miR-15a-5p	c123068_g1_i2	1009	-114.55	146	-18.92	2373964	22	6221
dre-miR-15a-5p	c140361_g1_i1	1012	-124.24	157	-20.63	2388426	22	8064
dre-miR-15a-5p	c133702_g1_i3	1019	-112.12	152	-18.3	2366430	22	5610
dre-miR-15a-5p	c131498_g1_i1	1022	-129.67	155	-20.26	2382328	22	12743
dre-miR-15a-5p	c132598_g1_i6	1024	-116.98	159	-22.35	2373311	22	4539
dre-miR-15a-5p	c38504_g1_i1	1029	-127.8	156	-20.58	2367238	22	3671
dre-miR-15a-5p	c142832_g3_i5	1029	-131.32	159	-23.67	2395392	22	11159
dre-miR-15a-5p	c130270_g1_i2	1029	-127.68	158	-19.78	2395738	22	4309
dre-miR-15a-5p	c144103_g5_i3	1031	-117.79	159	-17.96	2379934	22	15607
dre-miR-15a-5p	c141777_g1_i11	1032	-133.17	159	-21.64	2387700	22	10567
dre-miR-15a-5p	c137143_g1_i3	1032	-125.86	159	-26.24	2400986	22	3402
dre-miR-15a-5p	c132848_g1_i5	1041	-127.93	153	-19.95	2383006	22	5449
dre-miR-15a-5p	c143992_g1_i7	1042	-125.02	176	-23.69	2389433	22	17464
dre-miR-15a-5p	c138260_g3_i2	1042	-126.66	160	-21.46	2396328	22	5316
dre-miR-15a-5p	c130231_g1_i2	1045	-133.77	161	-23.44	2378293	22	8350
dre-miR-15a-5p	c140969_g1_i3	1046	-115.04	156	-17.96	2366110	22	12599
dre-miR-15a-5p	c118022_g1_i1	1048	-143.4	165	-23.31	2367318	22	6069
dre-miR-15a-5p	c133499_g1_i1	1048	-137.58	160	-24.84	2398193	22	7030
dre-miR-15a-5p	c117349_g1_i1	1050	-140.23	171	-26.99	2366207	22	6201
dre-miR-15a-5p	c140143_g1_i3	1050	-137.36	160	-23.78	2366472	22	12715
dre-miR-15a-5p	c141455_g1_i4	1050	-127.22	159	-20.29	2369474	22	7105
dre-miR-15a-5p	c117349_g1_i3	1050	-140.23	171	-26.99	2376161	22	6054
dre-miR-15a-5p	c142808_g2_i8	1061	-121.07	162	-22.76	2369269	22	13201
dre-miR-15a-5p	c138346_g2_i15	1061	-136.36	157	-25.61	2380172	22	9650
dre-miR-15a-5p	c120206_g1_i1	1061	-121.79	163	-19.83	2388856	22	6891
dre-miR-15a-5p	c138346_g2_i2	1061	-136.36	157	-25.61	2399375	22	9555
dre-miR-15a-5p	c96640_g1_i2	1071	-125.91	163	-20.88	2398304	22	3053
dre-miR-15a-5p	c141626_g1_i4	1074	-144.99	167	-24.64	2385929	22	13239
dre-miR-15a-5p	c133681_g1_i1	1159	-144.99	149	-22.99	2376657	22	5607
dre-miR-15a-5p	c133681_g1_i2	1159	-144.99	149	-22.99	2395312	22	5596
dre-miR-15a-5p	c136708_g1_i1	1160	-148.74	160	-24.05	2396484	22	6829
dre-miR-15a-5p	c139714_g1_i1	1167	-148.06	155	-22.91	2399585	22	16004
dre-miR-15a-5p	c80528_g1_i1	1169	-135.18	154	-20.38	2397338	22	748
dre-miR-15a-5p	c134476_g1_i3	1174	-165.01	155	-27.72	2377409	22	7617
dre-miR-15a-5p	c141393_g1_i5	1182	-142.68	157	-22.68	2366167	22	6005
dre-miR-15a-5p	c133361_g2_i4	1182	-144.74	162	-21.95	2381362	22	3763
dre-miR-15a-5p	c137940_g1_i7	1187	-155.38	163	-24.88	2395247	22	3718
dre-miR-15a-5p	c141833_g15_i1	1191	-146.87	158	-23.23	2373609	22	11089
dre-miR-15a-5p	c139145_g3_i2	1193	-132.19	163	-17.87	2366388	22	10090
dre-miR-15a-5p	c141777_g1_i8	1193	-155.37	161	-22.2	2387675	22	10838
dre-miR-15a-5p	c139145_g3_i1	1193	-132.19	163	-17.87	2388406	22	10099
dre-miR-15a-5p	c139145_g3_i3	1193	-132.19	163	-17.87	2398147	22	11221
dre-miR-15a-5p	c143596_g3_i7	1198	-149.24	163	-25.48	2388164	22	5286
dre-miR-15a-5p	c138377_g2_i1	1207	-146.59	164	-26.54	2374703	22	5634
dre-miR-15a-5p	c138377_g2_i4	1207	-146.59	164	-26.54	2380697	22	5646
dre-miR-15a-5p	c135782_g3_i2	1212	-151.22	162	-22.39	2369738	22	1677
dre-miR-15a-5p	c99099_g1_i1	1215	-153.01	166	-22.64	2401201	22	8348
dre-miR-15a-5p	c141626_g1_i2	1218	-159.67	167	-24.64	2378255	22	13230
dre-miR-15a-5p	c141035_g1_i5	1294	-152.93	149	-21.63	2374189	22	15889
dre-miR-15a-5p	c141035_g1_i3	1294	-152.93	149	-21.63	2389648	22	15931
dre-miR-15a-5p	c136014_g1_i1	1314	-147.58	153	-20.58	2387320	22	15541
dre-miR-15a-5p	c141321_g1_i1	1316	-156.96	152	-23.74	2365992	22	16276
dre-miR-15a-5p	c138329_g1_i4	1322	-182.29	153	-22.94	2397941	22	14524
dre-miR-15a-5p	c105358_g1_i2	1324	-162.4	154	-21.95	2386594	22	6022
dre-miR-15a-5p	c144161_g1_i3	1329	-162.04	154	-22.17	2366393	22	14743
dre-miR-15a-5p	c142433_g2_i6	1336	-169.54	160	-22.69	2399554	22	6172
dre-miR-15a-5p	c139145_g3_i4	1338	-147.52	163	-17.87	2399218	22	10191
dre-miR-15a-5p	c142586_g3_i3	1338	-165.55	158	-20.88	2399523	22	11115
dre-miR-15a-5p	c138260_g3_i7	1345	-160.46	160	-23.61	2400251	22	10216
dre-miR-15a-5p	c142878_g2_i4	1348	-166.02	159	-21.75	2377229	22	10328
dre-miR-15a-5p	c142878_g2_i1	1348	-166.02	159	-21.75	2379259	22	11272
dre-miR-15a-5p	c132598_g1_i1	1459	-169.11	159	-22.35	2400895	22	5656
dre-miR-15a-5p	c126007_g1_i2	1464	-173.83	158	-20.98	2391685	22	5792
dre-miR-15a-5p	c142433_g2_i3	1486	-190.39	160	-22.69	2366335	22	6313
dre-miR-15a-5p	c135971_g1_i4	1487	-184.71	160	-21.5	2395817	22	5855
dre-miR-15a-5p	c134476_g1_i4	1493	-194.43	163	-27.72	2400222	22	3491
dre-miR-15a-5p	c143674_g1_i2	1502	-179.33	168	-23.27	2381206	22	19154
dre-miR-15a-5p	c122394_g1_i1	1513	-178.43	163	-24.28	2388506	22	4638
dre-miR-15a-5p	c142831_g3_i2	1520	-205.91	168	-25.33	2380370	22	15890
dre-miR-15a-5p	c141413_g1_i2	1602	-189.16	157	-20.45	2369407	22	6476
dre-miR-15a-5p	c140231_g1_i5	1621	-201.6	162	-25.11	2369663	22	4800
dre-miR-15a-5p	c140231_g1_i1	1621	-201.6	162	-25.11	2385105	22	5692
dre-miR-15a-5p	c142861_g1_i2	1634	-190.59	155	-21.31	2382262	22	15416
dre-miR-15a-5p	c142995_g1_i3	1678	-198.98	161	-22.93	2377804	22	10626
dre-miR-15a-5p	c130465_g1_i6	1832	-219.77	167	-24.6	2374619	22	4368
dre-miR-15a-5p	c141413_g1_i1	1893	-225.24	157	-20.45	2382435	22	6575
dre-miR-15a-5p	c50919_g1_i1	1947	-227.74	162	-22.38	2400475	22	4475
dre-miR-15a-5p	c143367_g1_i1	2832	-332.47	161	-22.57	2388460	22	14497
dre-miR-15a-5p	c143367_g1_i2	2832	-332.47	161	-22.57	2393486	22	14263
dre-miR-15b-5p	c131498_g1_i1	1022	-124.53	157	-20.31	2454008	22	12743
dre-miR-15b-5p	c132152_g1_i1	1023	-119.72	155	-20.82	2451799	22	6362
dre-miR-15b-5p	c143596_g3_i7	1029	-119.17	155	-21.26	2459844	22	5286
dre-miR-15b-5p	c134559_g1_i2	1031	-132.37	154	-22.16	2442934	22	8014
dre-miR-15b-5p	c136708_g1_i1	1031	-131.85	160	-23.97	2468164	22	6829
dre-miR-15b-5p	c144103_g5_i3	1036	-129.04	160	-23.34	2451614	22	15607
dre-miR-15b-5p	c132848_g1_i5	1036	-119.74	155	-19.4	2454686	22	5449
dre-miR-15b-5p	c137136_g1_i3	1037	-133.91	156	-24.54	2466351	22	8841
dre-miR-15b-5p	c137136_g1_i1	1037	-133.91	156	-24.54	2469563	22	8815
dre-miR-15b-5p	c137136_g1_i5	1037	-133.91	156	-24.54	2470010	22	8628
dre-miR-15b-5p	c140069_g1_i1	1037	-123.45	159	-20.95	2471226	22	9643
dre-miR-15b-5p	c138377_g2_i1	1040	-111.28	158	-17.43	2446383	22	5634
dre-miR-15b-5p	c138377_g2_i4	1040	-111.28	158	-17.43	2452377	22	5646
dre-miR-15b-5p	c141405_g1_i7	1042	-126.84	155	-22.68	2459687	22	1724
dre-miR-15b-5p	c142586_g3_i3	1042	-120.75	158	-19.13	2471203	22	11115
dre-miR-15b-5p	c134476_g1_i4	1045	-129.18	167	-23.42	2471902	22	3491
dre-miR-15b-5p	c135971_g1_i4	1051	-129.75	159	-22.17	2467497	22	5855
dre-miR-15b-5p	c132335_g1_i1	1052	-130.17	158	-22.85	2450242	22	2792
dre-miR-15b-5p	c142861_g1_i2	1053	-116.13	155	-20.04	2453942	22	15416
dre-miR-15b-5p	c141833_g15_i3	1053	-123.93	158	-21.59	2468943	22	8240
dre-miR-15b-5p	c140143_g1_i3	1055	-118.78	158	-20.69	2438152	22	12715
dre-miR-15b-5p	c131161_g1_i1	1068	-133.72	158	-22.1	2460498	22	8605
dre-miR-15b-5p	c137940_g1_i7	1069	-126.87	166	-25.1	2466927	22	3718
dre-miR-15b-5p	c140969_g1_i3	1072	-126.81	171	-22.73	2437790	22	12599
dre-miR-15b-5p	c133361_g2_i4	1159	-142.13	154	-21.01	2453042	22	3763
dre-miR-15b-5p	c80528_g1_i1	1174	-131.01	153	-18.13	2469018	22	748
dre-miR-15b-5p	c137136_g1_i2	1182	-158.93	156	-25.02	2455609	22	8586
dre-miR-15b-5p	c140231_g1_i5	1183	-145.32	162	-23.44	2441343	22	4800
dre-miR-15b-5p	c140231_g1_i1	1183	-145.32	162	-23.44	2456785	22	5692
dre-miR-15b-5p	c143403_g1_i3	1183	-145.97	158	-25.18	2463741	22	14226
dre-miR-15b-5p	c138260_g3_i2	1183	-147.71	159	-21.65	2468008	22	5316
dre-miR-15b-5p	c144161_g1_i3	1185	-137.35	160	-20.61	2438073	22	14743
dre-miR-15b-5p	c139714_g1_i1	1194	-156.83	162	-28.26	2471265	22	16004
dre-miR-15b-5p	c143674_g1_i2	1213	-144.74	160	-22.36	2452886	22	19154
dre-miR-15b-5p	c142433_g2_i6	1316	-163.12	154	-25.14	2471234	22	6172
dre-miR-15b-5p	c105358_g1_i2	1330	-166.14	154	-22.51	2458274	22	6022
dre-miR-15b-5p	c50919_g1_i1	1330	-156.61	158	-20.62	2472155	22	4475
dre-miR-15b-5p	c141777_g1_i11	1333	-164.35	161	-22.92	2459380	22	10567
dre-miR-15b-5p	c142878_g2_i4	1359	-180.51	160	-25.71	2448909	22	10328
dre-miR-15b-5p	c142878_g2_i1	1359	-180.51	160	-25.71	2450939	22	11272
dre-miR-15b-5p	c142433_g2_i3	1466	-184.07	154	-25.14	2438015	22	6313
dre-miR-15b-5p	c126007_g1_i2	1479	-174.52	159	-21.32	2463365	22	5792
dre-miR-15b-5p	c142831_g3_i2	1483	-187.78	155	-26.26	2452050	22	15890
dre-miR-15b-5p	c141393_g1_i5	1484	-171.29	162	-20.44	2437847	22	6005
dre-miR-15b-5p	c136014_g1_i1	1485	-170.47	161	-22.63	2459000	22	15541
dre-miR-15b-5p	c141777_g1_i8	1485	-184.95	161	-22.92	2459355	22	10838
dre-miR-15b-5p	c138260_g3_i7	1491	-185.87	159	-21.98	2471931	22	10216
dre-miR-15b-5p	c130465_g1_i6	1500	-168.06	167	-20.61	2446299	22	4368
dre-miR-15b-5p	c141413_g1_i2	1636	-194.75	157	-20.83	2441087	22	6476
dre-miR-15b-5p	c99099_g1_i1	1645	-199.11	162	-22.76	2472881	22	8348
dre-miR-15b-5p	c141035_g1_i5	1656	-192.72	161	-24.81	2445869	22	15889
dre-miR-15b-5p	c141035_g1_i3	1656	-192.72	161	-24.81	2461328	22	15931
dre-miR-15b-5p	c141321_g1_i1	1759	-211.95	156	-24.28	2437672	22	16276
dre-miR-15b-5p	c141413_g1_i1	1773	-214.01	157	-20.83	2454115	22	6575
dre-miR-15b-5p	c142995_g1_i3	1812	-215.96	167	-23.35	2449484	22	10626
dre-miR-15b-5p	c122394_g1_i1	1999	-228.42	163	-23.43	2460186	22	4638
dre-miR-15b-5p	c143367_g1_i1	2206	-258.32	156	-21.74	2460140	22	14497
dre-miR-15b-5p	c143367_g1_i2	2206	-258.32	156	-21.74	2465166	22	14263
dre-miR-15c	c143751_g2_i8	1023	-137.94	152	-24.24	10828667	21	5648
dre-miR-15c	c143751_g2_i5	1023	-137.94	152	-24.24	10835673	21	5416
dre-miR-15c	c143751_g2_i6	1023	-137.94	152	-24.24	10856515	21	5928
dre-miR-15c	c127093_g1_i1	1032	-138.62	156	-23.27	10833844	21	4966
dre-miR-15c	c127093_g1_i2	1032	-138.62	156	-23.27	10847866	21	5806
dre-miR-15c	c126920_g1_i2	1033	-132.42	156	-27.45	10858418	21	5480
dre-miR-15c	c124333_g1_i2	1035	-131.01	155	-27.79	10850122	21	5471
dre-miR-15c	c136242_g1_i1	1036	-137.36	156	-23.79	10829257	21	8134
dre-miR-15c	c126471_g3_i1	1300	-183.32	155	-23.85	10845582	21	7351
dre-miR-15c	c139264_g1_i1	1924	-259.89	161	-23.95	10839214	21	14411
dre-miR-16a	c134948_g1_i1	1005	-115.57	148	-21.81	2538596	22	9142
dre-miR-16a	c136850_g3_i3	1014	-113.25	147	-18.77	2512117	22	4919
dre-miR-16a	c141833_g15_i1	1026	-125.07	152	-21.61	2516969	22	11089
dre-miR-16a	c135971_g1_i4	1026	-120.4	154	-19.25	2539177	22	5855
dre-miR-16a	c134351_g1_i2	1028	-119.44	160	-20.74	2526329	22	4184
dre-miR-16a	c142176_g1_i1	1032	-120.37	158	-21.53	2521990	22	8122
dre-miR-16a	c132742_g1_i2	1035	-113.53	155	-17.92	2518666	22	5669
dre-miR-16a	c141466_g1_i4	1035	-119.22	151	-20.77	2522143	22	10869
dre-miR-16a	c138260_g3_i2	1035	-118.58	155	-20.97	2539688	22	5316
dre-miR-16a	c139145_g3_i4	1035	-116.38	155	-18.66	2542578	22	10191
dre-miR-16a	c141777_g1_i8	1040	-127.68	158	-20.46	2531035	22	10838
dre-miR-16a	c139714_g1_i1	1040	-128.06	168	-21.84	2542945	22	16004
dre-miR-16a	c131498_g1_i1	1041	-118.72	155	-18.35	2525688	22	12743
dre-miR-16a	c142322_g7_i7	1041	-122.81	164	-20.68	2536688	22	6918
dre-miR-16a	c142433_g2_i6	1041	-122.34	157	-20.37	2542914	22	6172
dre-miR-16a	c142322_g7_i8	1041	-122.81	164	-20.68	2544239	22	6888
dre-miR-16a	c142808_g2_i8	1043	-123.66	154	-20.99	2512629	22	13201
dre-miR-16a	c80528_g1_i1	1043	-110.78	155	-16.45	2540698	22	748
dre-miR-16a	c142878_g2_i4	1046	-112.25	162	-18.95	2520589	22	10328
dre-miR-16a	c142995_g1_i3	1057	-115.16	168	-19.16	2521164	22	10626
dre-miR-16a	c136375_g2_i4	1071	-135.34	176	-23.19	2535235	22	7650
dre-miR-16a	c138346_g2_i15	1150	-136.89	152	-22.01	2523532	22	9650
dre-miR-16a	c138346_g2_i2	1150	-136.89	152	-22.01	2542735	22	9555
dre-miR-16a	c105358_g1_i2	1159	-138.62	155	-21.29	2529954	22	6022
dre-miR-16a	c136014_g1_i1	1160	-138.56	156	-22.94	2530680	22	15541
dre-miR-16a	c126007_g1_i2	1164	-139.74	157	-20.7	2535045	22	5792
dre-miR-16a	c142147_g1_i7	1168	-133.23	155	-20.98	2510129	22	18936
dre-miR-16a	c144103_g5_i3	1179	-135.03	164	-22.22	2523294	22	15607
dre-miR-16a	c142433_g2_i3	1186	-139.44	157	-20.37	2509695	22	6313
dre-miR-16a	c137940_g1_i7	1187	-140.94	163	-21.53	2538607	22	3718
dre-miR-16a	c99099_g1_i1	1189	-132.85	153	-19.77	2544561	22	8348
dre-miR-16a	c142878_g2_i1	1194	-126.95	162	-18.95	2522619	22	11272
dre-miR-16a	c140231_g1_i5	1313	-150.68	151	-18.7	2513023	22	4800
dre-miR-16a	c140231_g1_i1	1313	-150.68	151	-18.7	2528465	22	5692
dre-miR-16a	c142831_g3_i2	1331	-162.6	159	-20.43	2523730	22	15890
dre-miR-16a	c141393_g1_i5	1332	-149.48	158	-23.27	2509527	22	6005
dre-miR-16a	c50919_g1_i1	1342	-149.22	156	-19.34	2543835	22	4475
dre-miR-16a	c143367_g1_i1	1438	-168.83	151	-20.8	2531820	22	14497
dre-miR-16a	c143367_g1_i2	1438	-168.83	151	-20.8	2536846	22	14263
dre-miR-16a	c142861_g1_i2	1467	-161.36	153	-18.6	2525622	22	15416
dre-miR-16a	c138260_g3_i7	1488	-170.98	163	-20.97	2543611	22	10216
dre-miR-16a	c122394_g1_i1	1497	-163.83	157	-18.58	2531866	22	4638
dre-miR-16a	c130465_g1_i6	1519	-170.4	162	-23.73	2517979	22	4368
dre-miR-16a	c141413_g1_i1	2050	-241.7	155	-20.53	2525795	22	6575
dre-miR-16a	c141413_g1_i2	2065	-238.81	159	-20.53	2512767	22	6476
dre-miR-16b	c138346_g2_i15	1007	-119.11	152	-19.42	2559372	22	9650
dre-miR-16b	c138346_g2_i2	1007	-119.11	152	-19.42	2578575	22	9555
dre-miR-16b	c38504_g1_i1	1008	-119.5	148	-19.46	2546438	22	3671
dre-miR-16b	c136850_g3_i3	1014	-116.72	147	-19	2547957	22	4919
dre-miR-16b	c136014_g1_i1	1020	-119.05	156	-22.86	2566520	22	15541
dre-miR-16b	c144161_g1_i3	1022	-116.54	154	-19.38	2545593	22	14743
dre-miR-16b	c126007_g1_i2	1022	-124.57	157	-20.46	2570885	22	5792
dre-miR-16b	c140855_g2_i19	1026	-131.35	156	-23.65	2559984	22	10210
dre-miR-16b	c115810_g1_i3	1026	-120.07	151	-20.44	2561760	22	9257
dre-miR-16b	c140855_g2_i1	1026	-131.35	156	-23.65	2574439	22	10156
dre-miR-16b	c134351_g1_i2	1028	-125.59	160	-24.36	2562169	22	4184
dre-miR-16b	c139145_g3_i2	1030	-115.78	155	-20.96	2545588	22	10090
dre-miR-16b	c139145_g3_i1	1030	-115.78	155	-20.96	2567606	22	10099
dre-miR-16b	c139145_g3_i3	1030	-115.78	155	-20.96	2577347	22	11221
dre-miR-16b	c141466_g1_i4	1035	-120.8	151	-21	2557983	22	10869
dre-miR-16b	c138260_g3_i2	1035	-121.65	155	-19.54	2575528	22	5316
dre-miR-16b	c138568_g2_i7	1036	-135.73	157	-24.85	2560185	22	15529
dre-miR-16b	c138568_g2_i4	1036	-135.73	157	-24.85	2578967	22	15271
dre-miR-16b	c141777_g1_i8	1040	-128.05	158	-23.05	2566875	22	10838
dre-miR-16b	c139714_g1_i1	1040	-133.37	168	-22.07	2578785	22	16004
dre-miR-16b	c131498_g1_i1	1041	-120.67	155	-19.08	2561528	22	12743
dre-miR-16b	c142322_g7_i7	1041	-125.17	164	-22.3	2572528	22	6918
dre-miR-16b	c142322_g7_i8	1041	-125.17	164	-22.3	2580079	22	6888
dre-miR-16b	c143596_g3_i7	1045	-123.98	159	-19.39	2567364	22	5286
dre-miR-16b	c99099_g1_i1	1045	-120.52	153	-20.14	2580401	22	8348
dre-miR-16b	c142878_g2_i4	1046	-116.16	162	-18.95	2556429	22	10328
dre-miR-16b	c65276_g1_i2	1052	-115.83	155	-18.01	2577914	22	4659
dre-miR-16b	c105358_g1_i2	1159	-142.91	155	-23.37	2565794	22	6022
dre-miR-16b	c140231_g1_i5	1162	-140.36	150	-18.84	2548863	22	4800
dre-miR-16b	c140231_g1_i1	1162	-140.36	150	-18.84	2564305	22	5692
dre-miR-16b	c135971_g1_i4	1166	-134.38	154	-18.53	2575017	22	5855
dre-miR-16b	c142147_g1_i7	1168	-136.7	155	-20.2	2545969	22	18936
dre-miR-16b	c144103_g5_i3	1180	-133.68	164	-19.72	2559134	22	15607
dre-miR-16b	c139145_g3_i4	1182	-132.14	155	-20.96	2578418	22	10191
dre-miR-16b	c137940_g1_i7	1187	-144.01	163	-22.04	2574447	22	3718
dre-miR-16b	c142433_g2_i6	1187	-146.92	157	-22.53	2578754	22	6172
dre-miR-16b	c142808_g2_i8	1191	-147.61	154	-22.5	2548469	22	13201
dre-miR-16b	c142878_g2_i1	1194	-131.7	162	-18.95	2558459	22	11272
dre-miR-16b	c130465_g1_i6	1224	-142.61	162	-23.12	2553819	22	4368
dre-miR-16b	c141321_g1_i1	1273	-148.92	145	-19.67	2545192	22	16276
dre-miR-16b	c141833_g15_i1	1310	-155.61	152	-22.61	2552809	22	11089
dre-miR-16b	c141393_g1_i5	1329	-162.89	158	-22.02	2545367	22	6005
dre-miR-16b	c142831_g3_i2	1331	-160.03	159	-19.07	2559570	22	15890
dre-miR-16b	c142433_g2_i3	1332	-164.25	157	-22.53	2545535	22	6313
dre-miR-16b	c80528_g1_i1	1337	-144.9	155	-19.74	2576538	22	748
dre-miR-16b	c122394_g1_i1	1357	-152.24	157	-21.32	2567706	22	4638
dre-miR-16b	c142861_g1_i2	1481	-169.69	155	-21.26	2561462	22	15416
dre-miR-16b	c138260_g3_i7	1488	-179.19	163	-24.17	2579451	22	10216
dre-miR-16b	c50919_g1_i1	1796	-195.15	156	-19.51	2579675	22	4475
dre-miR-16b	c143367_g1_i1	2024	-225.92	151	-20.26	2567660	22	14497
dre-miR-16b	c143367_g1_i2	2024	-225.92	151	-20.26	2572686	22	14263
dre-miR-16b	c141413_g1_i1	2190	-259.79	155	-22.53	2561635	22	6575
dre-miR-16b	c141413_g1_i2	2205	-258.16	159	-22.53	2548607	22	6476
dre-miR-16c-3p	c100890_g1_i1	1056	-129.6	165	-24.97	2616729	23	6618
dre-miR-16c-5p	c101138_g1_i2	1007	-122.26	148	-21.07	2583110	22	2787
dre-miR-16c-5p	c137346_g3_i8	1007	-113.91	150	-19.24	2589512	22	4582
dre-miR-16c-5p	c140855_g2_i19	1020	-126.09	152	-22.72	2595824	22	10210
dre-miR-16c-5p	c140855_g2_i1	1020	-126.09	152	-22.72	2610279	22	10156
dre-miR-16c-5p	c141833_g15_i3	1021	-124.01	159	-23.35	2612303	22	8240
dre-miR-16c-5p	c139145_g3_i2	1023	-112.8	155	-20.96	2581428	22	10090
dre-miR-16c-5p	c139145_g3_i1	1023	-112.8	155	-20.96	2603446	22	10099
dre-miR-16c-5p	c139145_g3_i3	1023	-112.8	155	-20.96	2613187	22	11221
dre-miR-16c-5p	c140143_g1_i3	1032	-116.76	159	-18.75	2581512	22	12715
dre-miR-16c-5p	c134351_g1_i2	1035	-117.76	160	-22.28	2598009	22	4184
dre-miR-16c-5p	c140361_g1_i1	1036	-119.52	159	-20.72	2603466	22	8064
dre-miR-16c-5p	c138260_g3_i7	1036	-120.24	159	-22.34	2615291	22	10216
dre-miR-16c-5p	c115810_g1_i2	1037	-115.46	153	-18.6	2585246	22	8947
dre-miR-16c-5p	c131498_g1_i1	1038	-114.11	153	-17.62	2597368	22	12743
dre-miR-16c-5p	c143596_g3_i7	1040	-120.27	158	-19.37	2603204	22	5286
dre-miR-16c-5p	c137136_g1_i2	1041	-117.41	160	-21.63	2598969	22	8586
dre-miR-16c-5p	c137136_g1_i3	1041	-117.41	160	-21.63	2609711	22	8841
dre-miR-16c-5p	c137136_g1_i1	1041	-117.41	160	-21.63	2612923	22	8815
dre-miR-16c-5p	c137136_g1_i5	1041	-117.41	160	-21.63	2613370	22	8628
dre-miR-16c-5p	c141777_g1_i8	1042	-129.04	154	-21.61	2602715	22	10838
dre-miR-16c-5p	c132335_g1_i1	1044	-118.49	160	-20.72	2593602	22	2792
dre-miR-16c-5p	c142878_g2_i1	1051	-114.63	158	-17.96	2594299	22	11272
dre-miR-16c-5p	c137940_g1_i7	1051	-121.52	162	-22.22	2610287	22	3718
dre-miR-16c-5p	c138377_g2_i1	1052	-118.4	156	-18.79	2589743	22	5634
dre-miR-16c-5p	c138377_g2_i4	1052	-118.4	156	-18.79	2595737	22	5646
dre-miR-16c-5p	c65276_g1_i2	1057	-116.04	158	-18.01	2613754	22	4659
dre-miR-16c-5p	c130465_g1_i6	1075	-122.43	162	-21.69	2589659	22	4368
dre-miR-16c-5p	c141455_g1_i4	1086	-123.31	169	-20.01	2584514	22	7105
dre-miR-16c-5p	c144161_g1_i3	1159	-131.36	154	-19.46	2581433	22	14743
dre-miR-16c-5p	c136850_g3_i3	1166	-135.95	154	-21.18	2583797	22	4919
dre-miR-16c-5p	c126007_g1_i2	1166	-131.67	153	-18.45	2606725	22	5792
dre-miR-16c-5p	c139145_g3_i4	1171	-127.33	155	-20.96	2614258	22	10191
dre-miR-16c-5p	c132598_g1_i1	1175	-138.8	155	-24.02	2615935	22	5656
dre-miR-16c-5p	c135971_g1_i4	1176	-140.25	154	-22.06	2610857	22	5855
dre-miR-16c-5p	c142433_g2_i6	1176	-144.48	153	-23.21	2614594	22	6172
dre-miR-16c-5p	c136014_g1_i1	1180	-134.15	158	-18.57	2602360	22	15541
dre-miR-16c-5p	c115810_g1_i3	1183	-131.99	153	-18.6	2597600	22	9257
dre-miR-16c-5p	c144103_g5_i3	1203	-138.61	164	-24.63	2594974	22	15607
dre-miR-16c-5p	c122394_g1_i1	1210	-134.47	157	-21.17	2603546	22	4638
dre-miR-16c-5p	c140231_g1_i5	1300	-145.36	159	-17.41	2584703	22	4800
dre-miR-16c-5p	c140231_g1_i1	1300	-145.36	159	-17.41	2600145	22	5692
dre-miR-16c-5p	c105358_g1_i2	1309	-152.92	156	-21.29	2601634	22	6022
dre-miR-16c-5p	c142433_g2_i3	1317	-160.04	153	-23.21	2581375	22	6313
dre-miR-16c-5p	c141393_g1_i5	1318	-155.15	154	-19.94	2581207	22	6005
dre-miR-16c-5p	c139714_g1_i1	1318	-163.85	168	-22.07	2614625	22	16004
dre-miR-16c-5p	c142808_g2_i8	1335	-163.84	159	-24.7	2584309	22	13201
dre-miR-16c-5p	c80528_g1_i1	1336	-145.78	155	-19.74	2612378	22	748
dre-miR-16c-5p	c142995_g1_i3	1348	-147.32	168	-18.68	2592844	22	10626
dre-miR-16c-5p	c141833_g15_i1	1458	-184.69	159	-23.35	2588649	22	11089
dre-miR-16c-5p	c142861_g1_i2	1490	-176.93	157	-21.38	2597302	22	15416
dre-miR-16c-5p	c141321_g1_i1	1563	-174.98	146	-19.67	2581032	22	16276
dre-miR-16c-5p	c143367_g1_i1	1739	-196.65	151	-18.75	2603500	22	14497
dre-miR-16c-5p	c143367_g1_i2	1739	-196.65	151	-18.75	2608526	22	14263
dre-miR-16c-5p	c50919_g1_i1	1947	-210.06	156	-19.1	2615515	22	4475
dre-miR-16c-5p	c141413_g1_i1	2046	-243.64	159	-22.53	2597475	22	6575
dre-miR-16c-5p	c141413_g1_i2	2069	-244.68	159	-22.53	2584447	22	6476
dre-miR-1788-3p	c121917_g1_i1	1048	-136.31	161	-26.1	11415255	21	14866
dre-miR-1788-3p	c142586_g4_i1	1177	-152.9	158	-22.1	11418479	21	12109
dre-miR-1788-5p	c140860_g1_i4	1006	-133.62	157	-22.66	11375410	22	16160
dre-miR-1788-5p	c138907_g1_i4	1022	-110.01	152	-18.89	11368198	22	12870
dre-miR-1788-5p	c138907_g1_i2	1022	-110.01	152	-18.89	11372479	22	12913
dre-miR-1788-5p	c138907_g1_i3	1022	-110.01	152	-18.89	11374289	22	12903
dre-miR-1788-5p	c138907_g1_i1	1022	-110.01	152	-18.89	11394264	22	12957
dre-miR-1788-5p	c132897_g1_i1	1027	-113.4	160	-17.72	11387840	22	8280
dre-miR-1788-5p	c140635_g1_i2	1042	-117.11	158	-18.86	11378093	22	11985
dre-miR-1788-5p	c143487_g1_i2	1174	-153.91	161	-21.56	11382067	22	11399
dre-miR-1788-5p	c142147_g1_i7	1182	-141.3	162	-20.92	11362609	22	18936
dre-miR-1788-5p	c143992_g1_i5	1479	-175.69	166	-21.2	11390973	22	16784
dre-miR-17a-2-3p	c115810_g1_i2	1005	-155.59	150	-29.4	2728606	23	8947
dre-miR-17a-2-3p	c115810_g1_i3	1005	-155.59	150	-29.4	2740960	23	9257
dre-miR-17a-2-3p	c138591_g1_i2	1006	-132.83	151	-24.36	2725671	23	8154
dre-miR-17a-2-3p	c140951_g1_i1	1007	-140.66	151	-25.68	2759311	23	8384
dre-miR-17a-2-3p	c144412_g1_i1	1008	-134.6	148	-23.87	2754776	23	5684
dre-miR-17a-2-3p	c134770_g1_i2	1010	-127.56	154	-22.35	2725861	23	3689
dre-miR-17a-2-3p	c140044_g3_i16	1012	-139.89	152	-26.75	2752370	23	13669
dre-miR-17a-2-3p	c140884_g1_i1	1019	-128.01	154	-19.82	2734009	23	9673
dre-miR-17a-2-3p	c142875_g1_i3	1022	-130.46	153	-21.78	2753634	23	14551
dre-miR-17a-2-3p	c143487_g1_i2	1025	-144.77	154	-28.46	2744627	23	11399
dre-miR-17a-2-3p	c105929_g1_i4	1025	-128.96	152	-28.26	2752771	23	10601
dre-miR-17a-2-3p	c138107_g2_i4	1027	-142.51	157	-24.96	2729583	23	2818
dre-miR-17a-2-3p	c141666_g1_i3	1028	-153.5	154	-26.21	2754064	23	5690
dre-miR-17a-2-3p	c143590_g3_i8	1030	-130.55	156	-25.7	2725897	23	7691
dre-miR-17a-2-3p	c143535_g1_i3	1030	-137.56	154	-22.78	2732762	23	7044
dre-miR-17a-2-3p	c143590_g3_i4	1030	-130.55	156	-25.7	2745839	23	7976
dre-miR-17a-2-3p	c142292_g1_i2	1033	-141.49	165	-24.3	2742820	23	5949
dre-miR-17a-2-3p	c142479_g3_i4	1035	-149.84	161	-27.08	2751115	23	10362
dre-miR-17a-2-3p	c119203_g1_i3	1035	-148.59	171	-28.35	2758562	23	8438
dre-miR-17a-2-3p	c136238_g1_i1	1036	-141.03	159	-30.05	2725741	23	7835
dre-miR-17a-2-3p	c133651_g1_i1	1036	-143.53	163	-26.39	2748548	23	5900
dre-miR-17a-2-3p	c140291_g1_i6	1038	-131.1	164	-23.32	2758309	23	5474
dre-miR-17a-2-3p	c140734_g1_i2	1042	-154.37	165	-27.81	2731320	23	3816
dre-miR-17a-2-3p	c132063_g1_i2	1042	-150.02	161	-24.01	2732068	23	11216
dre-miR-17a-2-3p	c132063_g1_i1	1042	-150.02	161	-24.01	2755095	23	11228
dre-miR-17a-2-3p	c141854_g1_i1	1047	-134.15	159	-25.22	2734795	23	8854
dre-miR-17a-2-3p	c140890_g3_i5	1047	-155.59	161	-27.21	2756666	23	8855
dre-miR-17a-2-3p	c132376_g1_i4	1062	-147.82	165	-24.57	2731461	23	4903
dre-miR-17a-2-3p	c133499_g1_i1	1063	-141.16	161	-24.15	2756593	23	7030
dre-miR-17a-2-3p	c142083_g1_i1	1145	-154.97	148	-23.65	2738262	23	4628
dre-miR-17a-2-3p	c137088_g1_i1	1154	-138.4	149	-21.13	2744793	23	4450
dre-miR-17a-2-3p	c137088_g1_i2	1154	-138.4	149	-21.13	2758740	23	4841
dre-miR-17a-2-3p	c142736_g1_i3	1156	-148.85	153	-22.71	2753249	23	7627
dre-miR-17a-2-3p	c139714_g1_i1	1166	-158.12	162	-23.19	2757985	23	16004
dre-miR-17a-2-3p	c142808_g2_i8	1174	-170.22	158	-28.25	2727669	23	13201
dre-miR-17a-2-3p	c139839_g1_i1	1178	-171.41	162	-25.64	2739064	23	10335
dre-miR-17a-2-3p	c142831_g3_i2	1179	-153.78	159	-27.94	2738770	23	15890
dre-miR-17a-2-3p	c140588_g1_i4	1180	-164.87	162	-24.41	2754592	23	8243
dre-miR-17a-2-3p	c141321_g1_i1	1186	-169.77	158	-26.29	2724392	23	16276
dre-miR-17a-2-3p	c140890_g3_i3	1187	-170.91	161	-27.21	2748626	23	8911
dre-miR-17a-2-3p	c143539_g10_i6	1190	-166.08	165	-25.75	2734508	23	7110
dre-miR-17a-2-3p	c141000_g1_i4	1190	-174.62	159	-27.09	2751278	23	5584
dre-miR-17a-2-3p	c143539_g10_i2	1190	-166.08	165	-25.75	2754393	23	8016
dre-miR-17a-2-3p	c140734_g1_i5	1191	-176.71	165	-27.81	2728529	23	5730
dre-miR-17a-2-3p	c137799_g1_i1	1192	-176.89	159	-29.03	2755066	23	10777
dre-miR-17a-2-3p	c142832_g3_i5	1204	-163.22	156	-25.07	2753792	23	11159
dre-miR-17a-2-3p	c143367_g1_i1	1288	-177.53	155	-24.34	2746860	23	14497
dre-miR-17a-2-3p	c143367_g1_i2	1288	-177.53	155	-24.34	2751886	23	14263
dre-miR-17a-2-3p	c135951_g2_i5	1317	-181.75	159	-26.63	2729151	23	7874
dre-miR-17a-2-3p	c142292_g1_i4	1317	-180.63	165	-24.3	2741367	23	6412
dre-miR-17a-2-3p	c142292_g1_i13	1317	-180.63	165	-24.3	2755305	23	6366
dre-miR-17a-2-3p	c142009_g1_i8	1322	-177.41	158	-22.18	2741169	23	12031
dre-miR-17a-2-3p	c142009_g1_i5	1322	-177.41	158	-22.18	2743602	23	13098
dre-miR-17a-2-3p	c138193_g1_i1	1322	-183.25	155	-29.43	2749947	23	6937
dre-miR-17a-2-3p	c131957_g1_i1	1323	-173.9	157	-22.51	2732177	23	7945
dre-miR-17a-2-3p	c141957_g1_i5	1335	-196.94	171	-27.24	2731878	23	6046
dre-miR-17a-2-3p	c144286_g1_i2	1339	-185.89	161	-23.46	2731198	23	4005
dre-miR-17a-2-3p	c142147_g1_i7	1347	-179.93	162	-26.34	2725169	23	18936
dre-miR-17a-2-3p	c139457_g2_i7	1362	-173.55	166	-26.8	2728109	23	15103
dre-miR-17a-2-3p	c138346_g2_i15	1441	-198.83	153	-24.61	2738572	23	9650
dre-miR-17a-2-3p	c138346_g2_i2	1441	-198.83	153	-24.61	2757775	23	9555
dre-miR-17a-2-3p	c140860_g1_i4	1465	-208.65	152	-27.08	2737970	23	16160
dre-miR-17a-2-3p	c142292_g1_i8	1471	-200.22	165	-24.3	2724276	23	6390
dre-miR-17a-2-3p	c138193_g1_i5	1472	-201.67	155	-29.43	2749168	23	8029
dre-miR-17a-2-3p	c143403_g1_i3	1603	-230.85	155	-25.85	2750461	23	14226
dre-miR-17a-2-3p	c140585_g1_i3	1623	-226.43	158	-26.27	2739502	23	12911
dre-miR-17a-2-3p	c142586_g3_i3	1647	-238.92	163	-26.42	2757923	23	11115
dre-miR-17a-2-3p	c143992_g1_i5	1737	-236.06	152	-26.89	2753533	23	16784
dre-miR-17a-2-3p	c121120_g1_i4	1762	-252.22	161	-28.04	2744059	23	5892
dre-miR-17a-2-3p	c143992_g1_i7	2020	-282.24	152	-26.89	2747833	23	17464
dre-miR-17a-3p	c138591_g1_i2	1006	-129.26	146	-21.18	2689831	22	8154
dre-miR-17a-3p	c138329_g1_i4	1006	-130.42	150	-23.92	2720501	22	14524
dre-miR-17a-3p	c144412_g1_i1	1014	-133.3	148	-23.27	2718936	22	5684
dre-miR-17a-3p	c138689_g1_i1	1022	-134.67	164	-24.55	2704404	22	5934
dre-miR-17a-3p	c142831_g3_i2	1027	-124.89	154	-23.88	2702930	22	15890
dre-miR-17a-3p	c140291_g1_i6	1027	-126.83	157	-21.57	2722469	22	5474
dre-miR-17a-3p	c137799_g1_i1	1029	-141.03	159	-23.5	2719226	22	10777
dre-miR-17a-3p	c133651_g1_i1	1030	-136.61	162	-24.21	2712708	22	5900
dre-miR-17a-3p	c142808_g2_i8	1031	-147.91	163	-28.89	2691829	22	13201
dre-miR-17a-3p	c141666_g1_i3	1031	-152.97	154	-27.48	2718224	22	5690
dre-miR-17a-3p	c142292_g1_i4	1033	-142.25	166	-26.04	2705527	22	6412
dre-miR-17a-3p	c134867_g1_i1	1033	-149.64	163	-26.81	2715676	22	11296
dre-miR-17a-3p	c142292_g1_i13	1033	-142.25	166	-26.04	2719465	22	6366
dre-miR-17a-3p	c135951_g2_i5	1034	-140.29	159	-27.04	2693311	22	7874
dre-miR-17a-3p	c143403_g1_i3	1037	-136.56	152	-21.72	2714621	22	14226
dre-miR-17a-3p	c142479_g3_i4	1038	-150.01	160	-26.97	2715275	22	10362
dre-miR-17a-3p	c140734_g1_i5	1044	-147.72	165	-27.98	2692689	22	5730
dre-miR-17a-3p	c140890_g3_i5	1047	-152.4	161	-26.68	2720826	22	8855
dre-miR-17a-3p	c141854_g1_i1	1052	-141.34	160	-27.53	2698955	22	8854
dre-miR-17a-3p	c140884_g1_i1	1155	-143.87	152	-19.12	2698169	22	9673
dre-miR-17a-3p	c142736_g1_i3	1158	-154.25	153	-24.56	2717409	22	7627
dre-miR-17a-3p	c139714_g1_i1	1159	-164.95	153	-24.67	2722145	22	16004
dre-miR-17a-3p	c142875_g1_i3	1169	-145.48	155	-21.56	2717794	22	14551
dre-miR-17a-3p	c138193_g1_i1	1173	-155.8	152	-25.14	2714107	22	6937
dre-miR-17a-3p	c140588_g1_i4	1173	-159.73	157	-24.13	2718752	22	8243
dre-miR-17a-3p	c141000_g1_i4	1178	-169.72	157	-27.5	2715438	22	5584
dre-miR-17a-3p	c142009_g1_i8	1180	-157.41	160	-23.31	2705329	22	12031
dre-miR-17a-3p	c142292_g1_i8	1185	-166.28	166	-26.04	2688436	22	6390
dre-miR-17a-3p	c140890_g3_i3	1187	-167.35	161	-26.68	2712786	22	8911
dre-miR-17a-3p	c142832_g3_i5	1190	-153.7	155	-23.34	2717952	22	11159
dre-miR-17a-3p	c132376_g1_i4	1194	-161.73	159	-24.99	2695621	22	4903
dre-miR-17a-3p	c142147_g1_i7	1200	-163.57	159	-25.82	2689329	22	18936
dre-miR-17a-3p	c141957_g1_i5	1203	-173.68	176	-28.05	2696038	22	6046
dre-miR-17a-3p	c142083_g1_i1	1283	-174.14	147	-23.95	2702422	22	4628
dre-miR-17a-3p	c138346_g2_i15	1305	-177.36	153	-24.61	2702732	22	9650
dre-miR-17a-3p	c138346_g2_i2	1305	-177.36	153	-24.61	2721935	22	9555
dre-miR-17a-3p	c140585_g1_i3	1308	-177.36	158	-23.24	2703662	22	12911
dre-miR-17a-3p	c131957_g1_i1	1319	-178.29	155	-24.59	2696337	22	7945
dre-miR-17a-3p	c142009_g1_i5	1321	-178.62	160	-23.31	2707762	22	13098
dre-miR-17a-3p	c138193_g1_i5	1323	-174.22	152	-25.14	2713328	22	8029
dre-miR-17a-3p	c140860_g1_i4	1328	-174.1	156	-22.38	2702130	22	16160
dre-miR-17a-3p	c144286_g1_i2	1334	-185.35	161	-23.9	2695358	22	4005
dre-miR-17a-3p	c142586_g3_i3	1343	-191.3	158	-24.02	2722083	22	11115
dre-miR-17a-3p	c141321_g1_i1	1472	-211.77	159	-26.7	2688552	22	16276
dre-miR-17a-3p	c121120_g1_i4	1472	-199.04	161	-30.16	2708219	22	5892
dre-miR-17a-3p	c139457_g2_i7	1500	-199.03	166	-27.09	2692269	22	15103
dre-miR-17a-3p	c143992_g1_i5	1744	-234.23	152	-24.93	2717693	22	16784
dre-miR-17a-3p	c143992_g1_i7	1747	-240.63	152	-24.93	2711993	22	17464
dre-miR-181a-5p	c141805_g1_i1	1092	-135.06	171	-26.31	997119	23	5966
dre-miR-181b-5p	c138549_g1_i4	1031	-129.8	162	-21.93	253133	22	10808
dre-miR-181b-5p	c138549_g1_i3	1031	-129.8	162	-21.93	274902	22	8242
dre-miR-181b-5p	c110040_g1_i2	1038	-129.43	162	-21.95	252984	22	5932
dre-miR-181b-5p	c140106_g3_i2	1079	-134.95	170	-23.86	255759	22	4967
dre-miR-181b-5p	c128636_g1_i3	1193	-150.08	164	-28.54	267562	22	5465
dre-miR-181b-5p	c128636_g1_i4	1485	-186.9	164	-28.54	270202	22	5552
dre-miR-181b-5p	c128636_g1_i5	1485	-186.9	164	-28.54	277740	22	5720
dre-miR-181c-5p	c110040_g1_i2	1038	-134.03	162	-21.71	7349304	22	5932
dre-miR-181c-5p	c131394_g1_i1	1083	-136.8	167	-28.68	7366225	22	6665
dre-miR-181c-5p	c128636_g1_i3	1193	-160.41	164	-26.91	7363882	22	5465
dre-miR-181c-5p	c128636_g1_i4	1485	-199.84	164	-26.91	7366522	22	5552
dre-miR-181c-5p	c128636_g1_i5	1485	-199.84	164	-26.91	7374060	22	5720
dre-miR-183-5p	c136014_g1_i1	1000	-139.36	147	-21.98	416120	23	15541
dre-miR-183-5p	c140509_g2_i3	1011	-134.5	152	-21.83	416289	23	9876
dre-miR-183-5p	c142479_g3_i4	1030	-140.73	162	-22.85	421515	23	10362
dre-miR-183-5p	c121296_g2_i2	1031	-136.09	162	-21.94	415640	23	6804
dre-miR-183-5p	c141642_g1_i4	1034	-140.16	154	-25.39	421503	23	12968
dre-miR-183-5p	c137523_g1_i3	1039	-131.9	155	-21.38	421379	23	11659
dre-miR-184	c141720_g1_i4	1145	-166.82	147	-24.4	7436945	22	8396
dre-miR-184	c144412_g1_i1	1200	-178.8	163	-27.24	7449816	22	5684
dre-miR-184	c142828_g2_i4	1721	-265.08	152	-24.59	7419839	22	5102
dre-miR-187	c142147_g1_i7	1155	-156.34	153	-24.48	467249	20	18936
dre-miR-18a	c139692_g3_i2	1162	-137.53	152	-21.97	2862221	22	7721
dre-miR-18a	c142586_g4_i1	1320	-165.11	162	-21.72	2852719	22	12109
dre-miR-18b-5p	c139692_g3_i2	1016	-116.01	152	-19.73	2898061	22	7721
dre-miR-18b-5p	c141921_g2_i3	1142	-126.97	146	-17.64	2901971	22	13321
dre-miR-193a-3p	c139714_g1_i1	1062	-155.57	163	-26.28	7596385	22	16004
dre-miR-193a-3p	c142971_g3_i4	1186	-153.64	162	-25.57	7577512	22	15322
dre-miR-193a-5p	c142971_g3_i4	1016	-150.72	150	-23.87	7541672	22	15322
dre-miR-193b-3p	c139714_g1_i1	1045	-165.29	159	-27.63	7668065	22	16004
dre-miR-193b-3p	c142971_g3_i4	1303	-152.08	150	-18.63	7649192	22	15322
dre-miR-193b-5p	c97246_g1_i2	1041	-145.36	160	-26.42	7611351	21	2685
dre-miR-193b-5p	c138369_g2_i11	1069	-164.95	160	-27.09	7618374	21	1137
dre-miR-199-3p	c138570_g2_i3	1042	-114.76	158	-19.64	611198	22	11243
dre-miR-199-3p	c138570_g2_i4	1042	-114.76	158	-19.64	614050	22	10112
dre-miR-199-3p	c138570_g2_i1	1042	-114.76	158	-19.64	618448	22	10121
dre-miR-199-3p	c138570_g2_i5	1042	-114.76	158	-19.64	641330	22	10238
dre-miR-199-3p	c138570_g2_i2	1184	-130.85	158	-19.64	626844	22	10732
dre-miR-199-5p	c144161_g1_i3	1029	-146.71	160	-32.81	574393	23	14743
dre-miR-199-5p	c142147_g1_i7	1033	-150.27	154	-33.32	574769	23	18936
dre-miR-199-5p	c129980_g1_i2	1071	-132.3	167	-24.61	601326	23	10406
dre-miR-199-5p	c141626_g1_i2	1164	-135.23	153	-21.24	586255	23	13230
dre-miR-199-5p	c141626_g1_i4	1164	-135.23	153	-21.24	593929	23	13239
dre-miR-199-5p	c121917_g1_i1	1436	-199.46	151	-28.86	591575	23	14866
dre-miR-19b-5p	c132897_g1_i1	1049	-108.99	156	-16.88	3072960	22	8280
dre-miR-19b-5p	c126326_g2_i1	1136	-115.72	178	-21.22	3060296	22	1494
dre-miR-19b-5p	c140969_g1_i3	1209	-133.03	165	-18.82	3047070	22	12599
dre-miR-19b-5p	c338370_g1_i1	1261	-118.63	162	-15.73	3073902	22	459
dre-miR-19b-5p	c142264_g1_i1	1405	-157.56	174	-21.63	3060013	22	7215
dre-miR-19b-5p	c142264_g1_i2	1405	-157.56	174	-21.63	3074439	22	7395
dre-miR-19c-5p	c142264_g1_i1	1225	-153.4	173	-24.75	3131693	22	7215
dre-miR-19c-5p	c142264_g1_i2	1225	-153.4	173	-24.75	3146119	22	7395
dre-miR-19d-5p	c142736_g1_i3	1002	-141.13	150	-23.27	3219169	24	7627
dre-miR-19d-5p	c143403_g1_i3	1036	-167.76	160	-30.86	3216381	24	14226
dre-miR-19d-5p	c142875_g1_i3	1037	-164.44	162	-29.7	3219554	24	14551
dre-miR-19d-5p	c143936_g1_i7	1048	-173.03	157	-31.57	3221603	24	7838
dre-miR-19d-5p	c135459_g2_i2	1340	-195.65	163	-26.53	3191411	24	7879
dre-miR-19d-5p	c135459_g2_i4	1340	-195.65	163	-26.53	3202815	24	7852
dre-miR-19d-5p	c135459_g2_i1	1340	-195.65	163	-26.53	3219355	24	7912
dre-miR-19d-5p	c141035_g1_i5	1475	-237.12	157	-27.02	3198509	24	15889
dre-miR-19d-5p	c141035_g1_i3	1475	-237.12	157	-27.02	3213968	24	15931
dre-miR-200a-3p	c139502_g4_i2	1041	-123.61	156	-20.97	7871596	22	6331
dre-miR-200a-3p	c142009_g1_i8	1073	-123.01	158	-20.8	7866289	22	12031
dre-miR-200a-3p	c142009_g1_i5	1223	-140.78	158	-20.8	7868722	22	13098
dre-miR-202-3p	c138907_g1_i2	1003	-145.89	148	-25.89	8075199	22	12913
dre-miR-202-3p	c138907_g1_i4	1144	-163.62	148	-25.89	8070918	22	12870
dre-miR-202-3p	c138907_g1_i3	1144	-163.62	148	-25.89	8077009	22	12903
dre-miR-202-3p	c138907_g1_i1	1144	-163.62	148	-25.89	8096984	22	12957
dre-miR-202-3p	c142971_g3_i4	1154	-152.68	153	-24.22	8079272	22	15322
dre-miR-203a-5p	c132604_g1_i1	1014	-112.85	157	-17.23	692834	24	5742
dre-miR-203a-5p	c136699_g1_i8	1020	-121.18	153	-20.3	687314	24	9257
dre-miR-203a-5p	c142611_g1_i1	1180	-149.24	154	-23.31	681474	24	18600
dre-miR-204-2-3p	c142861_g1_i2	1033	-150.52	158	-24.45	8188342	21	15416
dre-miR-204-3p	c141035_g1_i5	1005	-149.05	150	-28.61	797229	22	15889
dre-miR-204-3p	c141035_g1_i3	1005	-149.05	150	-28.61	812688	22	15931
dre-miR-204-3p	c142586_g4_i1	1009	-147.53	150	-26.93	809839	22	12109
dre-miR-204-3p	c140987_g1_i4	1012	-151.5	152	-23.54	815289	22	16713
dre-miR-204-3p	c133434_g1_i4	1013	-144.74	155	-23.07	790899	22	7815
dre-miR-204-3p	c140499_g6_i7	1016	-156.1	154	-26.96	803203	22	5879
dre-miR-204-3p	c139623_g2_i3	1018	-157.71	155	-29.65	794469	22	6412
dre-miR-204-3p	c141321_g1_i1	1028	-143.75	156	-25.61	789032	22	16276
dre-miR-204-3p	c101589_g1_i1	1042	-152.28	163	-26.59	816236	22	5438
dre-miR-204-3p	c101589_g1_i2	1042	-152.28	163	-26.59	821198	22	5458
dre-miR-204-3p	c136133_g1_i5	1047	-140.43	158	-24.91	810789	22	6068
dre-miR-204-3p	c142611_g1_i1	1163	-161.8	152	-22.65	788994	22	18600
dre-miR-204-3p	c141921_g2_i3	1177	-176.14	158	-25.81	823251	22	13321
dre-miR-204-3p	c131957_g1_i1	1198	-154.37	152	-22.1	796817	22	7945
dre-miR-204-3p	c143674_g1_i2	1322	-175.31	155	-24.21	804246	22	19154
dre-miR-204-5p	c135615_g1_i2	1012	-124.6	153	-21.54	777459	22	11803
dre-miR-204-5p	c137687_g3_i1	1307	-169.99	156	-25.07	773956	22	4724
dre-miR-204-5p	c137687_g3_i6	1451	-184.76	156	-25.07	755833	22	7051
dre-miR-204-5p	c140568_g1_i1	1783	-246.25	161	-27.38	765082	22	6757
dre-miR-204-5p	c140568_g1_i4	1783	-246.25	161	-27.38	769683	22	7005
dre-miR-204-5p	c140568_g1_i8	1783	-246.25	161	-27.38	785487	22	6793
dre-miR-205-3p	c140143_g1_i3	1033	-124.5	159	-20.64	861192	22	12715
dre-miR-205-3p	c144724_g1_i1	1046	-118.63	159	-21.16	880733	22	10291
dre-miR-205-3p	c155164_g1_i1	1081	-130.18	166	-20.99	894504	22	1283
dre-miR-205-3p	c130759_g1_i1	1193	-147.08	158	-22.76	872248	22	5756
dre-miR-205-3p	c144161_g1_i3	1312	-160.24	154	-23.87	861113	22	14743
dre-miR-205-5p	c141035_g1_i5	1004	-141.53	149	-28.45	833069	22	15889
dre-miR-205-5p	c141035_g1_i3	1004	-141.53	149	-28.45	848528	22	15931
dre-miR-205-5p	c139027_g1_i1	1011	-149.54	147	-26.13	824347	22	8126
dre-miR-205-5p	c132831_g1_i3	1023	-145.61	163	-27.46	826729	22	4641
dre-miR-205-5p	c132831_g1_i1	1023	-145.61	163	-27.46	828869	22	4509
dre-miR-205-5p	c132831_g1_i2	1023	-145.61	163	-27.46	835204	22	4653
dre-miR-205-5p	c132897_g1_i1	1050	-129.94	159	-21.12	850880	22	8280
dre-miR-205-5p	c137328_g1_i1	1160	-156.55	156	-24.16	859570	22	9226
dre-miR-205-5p	c129550_g2_i3	1322	-198.25	159	-34.02	852130	22	10350
dre-miR-205-5p	c129550_g2_i2	1322	-198.25	159	-34.02	853524	22	10382
dre-miR-205-5p	c139264_g1_i1	1485	-208.36	159	-29.03	839854	22	14411
dre-miR-20a-3p	c141000_g1_i4	1011	-134.98	155	-21.17	3324718	22	5584
dre-miR-20a-3p	c124489_g1_i3	1012	-139.2	153	-22.47	3299679	22	3410
dre-miR-20a-3p	c144003_g4_i3	1025	-136.66	156	-22.2	3312499	22	15167
dre-miR-20a-3p	c139714_g1_i1	1027	-135.34	156	-25.43	3331425	22	16004
dre-miR-20a-3p	c142808_g2_i8	1028	-128.13	153	-23.44	3301109	22	13201
dre-miR-20a-3p	c140176_g7_i11	1030	-125.14	154	-19.01	3301685	22	6260
dre-miR-20a-3p	c140176_g7_i1	1030	-125.14	154	-19.01	3321035	22	5857
dre-miR-20a-3p	c140176_g7_i2	1030	-125.14	154	-19.01	3325640	22	5791
dre-miR-20a-3p	c142736_g1_i3	1032	-135.71	157	-22.98	3326689	22	7627
dre-miR-20a-3p	c129753_g1_i1	1035	-138.32	158	-27.25	3297313	22	6488
dre-miR-20a-3p	c129753_g1_i2	1035	-138.32	158	-27.25	3304025	22	6368
dre-miR-20a-3p	c133560_g1_i2	1035	-135.65	152	-22.42	3310993	22	14202
dre-miR-20a-3p	c142009_g1_i8	1041	-124.65	163	-23.31	3314609	22	12031
dre-miR-20a-3p	c121120_g1_i4	1041	-128.56	154	-25.11	3317499	22	5892
dre-miR-20a-3p	c140588_g1_i4	1042	-140.3	158	-25.63	3328032	22	8243
dre-miR-20a-3p	c143535_g1_i3	1045	-137.4	161	-22.41	3306202	22	7044
dre-miR-20a-3p	c132376_g1_i4	1049	-131.26	160	-23.19	3304901	22	4903
dre-miR-20a-3p	c143992_g1_i7	1049	-135.18	160	-28.93	3321273	22	17464
dre-miR-20a-3p	c138193_g1_i1	1050	-132.33	153	-22.95	3323387	22	6937
dre-miR-20a-3p	c139050_g3_i1	1057	-143.25	166	-23.52	3302308	22	6273
dre-miR-20a-3p	c139457_g2_i1	1058	-129	156	-22.41	3331978	22	5803
dre-miR-20a-3p	c138737_g1_i3	1069	-132.95	162	-24.59	3324865	22	5585
dre-miR-20a-3p	c142219_g2_i5	1069	-153.38	162	-26.04	3325436	22	8992
dre-miR-20a-3p	c142219_g2_i6	1069	-153.38	162	-26.04	3329705	22	9085
dre-miR-20a-3p	c140890_g3_i5	1159	-158.69	149	-23.1	3330106	22	8855
dre-miR-20a-3p	c138591_g1_i2	1163	-156.62	154	-25.13	3299111	22	8154
dre-miR-20a-3p	c140895_g1_i4	1169	-143.58	158	-21.04	3307554	22	9400
dre-miR-20a-3p	c138346_g2_i15	1173	-168.55	157	-24.54	3312012	22	9650
dre-miR-20a-3p	c138346_g2_i2	1173	-168.55	157	-24.54	3331215	22	9555
dre-miR-20a-3p	c133560_g1_i3	1181	-152	152	-22.42	3324983	22	14693
dre-miR-20a-3p	c142009_g1_i5	1182	-142.34	163	-23.31	3317042	22	13098
dre-miR-20a-3p	c140585_g1_i3	1186	-134.39	162	-20.38	3312942	22	12911
dre-miR-20a-3p	c131403_g1_i2	1195	-156.65	163	-24.68	3313249	22	4634
dre-miR-20a-3p	c140734_g1_i2	1198	-172.28	163	-25.07	3304760	22	3816
dre-miR-20a-3p	c129117_g1_i1	1200	-158	166	-25.86	3309469	22	7172
dre-miR-20a-3p	c143487_g1_i2	1209	-166.46	162	-28.09	3318067	22	11399
dre-miR-20a-3p	c138193_g1_i5	1213	-155.65	163	-23.32	3322608	22	8029
dre-miR-20a-3p	c140890_g3_i3	1304	-173.92	149	-23.1	3322066	22	8911
dre-miR-20a-3p	c142831_g3_i2	1317	-166	154	-20.32	3312210	22	15890
dre-miR-20a-3p	c137799_g1_i1	1322	-179.67	159	-25.26	3328506	22	10777
dre-miR-20a-3p	c142586_g3_i3	1332	-180.88	160	-26.42	3331363	22	11115
dre-miR-20a-3p	c142875_g1_i3	1334	-171.74	166	-25.63	3327074	22	14551
dre-miR-20a-3p	c143403_g1_i3	1335	-172.93	159	-23.73	3323901	22	14226
dre-miR-20a-3p	c140734_g1_i5	1343	-191.61	163	-25.07	3301969	22	5730
dre-miR-20a-3p	c141321_g1_i1	1344	-172.74	164	-24.29	3297832	22	16276
dre-miR-20a-3p	c140860_g1_i4	1364	-163.22	162	-24.47	3311410	22	16160
dre-miR-20a-3p	c142832_g3_i5	1457	-173.24	152	-20.94	3327232	22	11159
dre-miR-20a-3p	c131957_g1_i1	1486	-177.72	160	-22.15	3305617	22	7945
dre-miR-20a-3p	c143992_g1_i5	1489	-199.41	160	-28.93	3326973	22	16784
dre-miR-20a-3p	c139457_g2_i7	1491	-180.16	156	-22.41	3301549	22	15103
dre-miR-20a-5p	c141921_g2_i3	1031	-127.23	159	-24.7	3296211	23	13321
dre-miR-20b-3p	c142938_g2_i1	1063	-128.35	169	-21.05	2811090	23	7519
dre-miR-20b-3p	c142938_g2_i5	1063	-128.35	169	-21.05	2811983	23	7403
dre-miR-20b-3p	c142938_g2_i4	1063	-128.35	169	-21.05	2824738	23	7393
dre-miR-21	c138907_g1_i4	1024	-132.04	158	-21.98	3340038	23	12870
dre-miR-21	c138907_g1_i2	1024	-132.04	158	-21.98	3344319	23	12913
dre-miR-21	c138907_g1_i3	1024	-132.04	158	-21.98	3346129	23	12903
dre-miR-21	c138907_g1_i1	1024	-132.04	158	-21.98	3366104	23	12957
dre-miR-210-3p	c131371_g1_i2	1143	-157.6	149	-23.7	951650	22	613
dre-miR-210-3p	c141630_g1_i2	1204	-188.94	164	-29.31	940867	22	8534
dre-miR-210-5p	c140955_g1_i8	1357	-192.33	162	-26.97	906722	22	14824
dre-miR-214	c138223_g1_i5	1003	-114.24	154	-17.39	1044958	21	7182
dre-miR-214	c138223_g1_i4	1003	-114.24	154	-17.39	1067754	21	7066
dre-miR-214	c142971_g3_i4	1004	-135.28	155	-25.6	1054632	21	15322
dre-miR-214	c138875_g3_i7	1006	-138.59	153	-24.53	1065940	21	6190
dre-miR-214	c133560_g1_i2	1009	-122.5	153	-21.18	1053073	21	14202
dre-miR-214	c133560_g1_i3	1009	-122.5	153	-21.18	1067063	21	14693
dre-miR-214	c141687_g7_i4	1012	-155.35	151	-27.64	1042848	21	4595
dre-miR-214	c141687_g7_i7	1012	-155.35	151	-27.64	1062861	21	5113
dre-miR-214	c142017_g1_i2	1013	-141.19	154	-22.63	1063677	21	3152
dre-miR-214	c143403_g1_i3	1013	-134.34	152	-24.82	1065981	21	14226
dre-miR-214	c142831_g3_i2	1018	-135.65	153	-23.83	1054290	21	15890
dre-miR-214	c140160_g1_i4	1024	-143.84	163	-30.77	1057799	21	5433
dre-miR-214	c142586_g4_i1	1024	-150.42	159	-24.1	1060719	21	12109
dre-miR-214	c127178_g1_i1	1027	-135.95	156	-22.53	1050367	21	4107
dre-miR-214	c144151_g2_i4	1027	-140.76	152	-26.7	1063692	21	8379
dre-miR-214	c121917_g1_i1	1029	-131.23	152	-28.4	1057495	21	14866
dre-miR-214	c136637_g1_i1	1030	-144.77	152	-24.67	1044578	21	4464
dre-miR-214	c138811_g1_i5	1034	-138.36	156	-24.84	1067773	21	10293
dre-miR-214	c137940_g1_i7	1047	-143.65	163	-23.24	1069167	21	3718
dre-miR-214	c119638_g1_i1	1047	-161.55	162	-29.45	1073449	21	5285
dre-miR-214	c142808_g2_i8	1051	-152.39	161	-28.62	1043189	21	13201
dre-miR-214	c142830_g5_i1	1062	-177.61	166	-32.2	1054305	21	7616
dre-miR-214	c142830_g5_i16	1062	-177.61	166	-32.2	1060425	21	7570
dre-miR-214	c142830_g5_i6	1062	-177.61	166	-32.2	1067597	21	7594
dre-miR-214	c142830_g5_i17	1062	-177.61	166	-32.2	1073590	21	7827
dre-miR-214	c80528_g1_i1	1065	-164.63	155	-26.79	1071258	21	748
dre-miR-214	c136311_g1_i1	1066	-156.93	160	-29.51	1072365	21	4169
dre-miR-214	c138568_g2_i9	1157	-155.84	149	-23.93	1050387	21	8285
dre-miR-214	c140461_g5_i3	1158	-148.08	150	-25.65	1047068	21	6784
dre-miR-214	c127397_g1_i1	1166	-170.36	150	-28.99	1056511	21	8582
dre-miR-214	c141466_g1_i4	1169	-158.67	152	-24.46	1052703	21	10869
dre-miR-214	c140568_g1_i1	1170	-153.28	151	-21.56	1051802	21	6757
dre-miR-214	c140568_g1_i4	1170	-153.28	151	-21.56	1056403	21	7005
dre-miR-214	c140568_g1_i8	1170	-153.28	151	-21.56	1072207	21	6793
dre-miR-214	c142875_g1_i3	1174	-145.74	155	-23.84	1069154	21	14551
dre-miR-214	c128319_g1_i2	1182	-186.27	159	-27.91	1050350	21	3237
dre-miR-214	c141854_g1_i1	1183	-164.37	164	-26.24	1050315	21	8854
dre-miR-214	c141436_g2_i2	1183	-171.95	156	-27.39	1073851	21	7267
dre-miR-214	c139457_g2_i7	1186	-173.42	163	-25.8	1043629	21	15103
dre-miR-214	c142036_g5_i11	1186	-160.81	167	-27.34	1048767	21	7453
dre-miR-214	c142036_g5_i6	1186	-160.81	167	-27.34	1052729	21	7220
dre-miR-214	c135413_g3_i5	1190	-168.76	156	-23.88	1070629	21	9086
dre-miR-214	c140084_g7_i3	1199	-162.43	161	-25.85	1040460	21	8585
dre-miR-214	c140084_g7_i2	1199	-162.43	161	-25.85	1072324	21	8564
dre-miR-214	c140472_g6_i12	1206	-182	178	-30.31	1041088	21	6059
dre-miR-214	c128725_g1_i1	1209	-175.23	166	-31.28	1058412	21	1943
dre-miR-214	c131161_g1_i1	1311	-168.76	155	-22.31	1062738	21	8605
dre-miR-214	c142036_g5_i7	1326	-177.22	167	-27.34	1065791	21	7829
dre-miR-214	c132152_g1_i1	1333	-170.51	169	-25.97	1054039	21	6362
dre-miR-214	c140231_g1_i5	1338	-191.74	159	-27.35	1043583	21	4800
dre-miR-214	c140231_g1_i1	1338	-191.74	159	-27.35	1059025	21	5692
dre-miR-214	c143367_g1_i1	1454	-207.54	158	-27.02	1062380	21	14497
dre-miR-214	c143367_g1_i2	1454	-207.54	158	-27.02	1067406	21	14263
dre-miR-214	c142995_g1_i3	1458	-213.23	161	-26.71	1051724	21	10626
dre-miR-214	c142219_g2_i5	1465	-192.08	160	-25.44	1067516	21	8992
dre-miR-214	c142219_g2_i6	1465	-192.08	160	-25.44	1071785	21	9085
dre-miR-214	c140549_g1_i2	1613	-223.62	153	-27.21	1074123	21	13250
dre-miR-214	c143674_g1_i2	1647	-232.61	162	-25.23	1055126	21	19154
dre-miR-214	c138568_g2_i7	1764	-253.04	161	-27.22	1054905	21	15529
dre-miR-214	c138568_g2_i4	1764	-253.04	161	-27.22	1073687	21	15271
dre-miR-214	c138329_g1_i4	1801	-230.76	165	-26.64	1071861	21	14524
dre-miR-214	c137481_g4_i8	1903	-236.07	155	-23.87	1050700	21	5788
dre-miR-214	c137481_g4_i7	1903	-236.07	155	-23.87	1057030	21	5449
dre-miR-214	c142479_g3_i4	1910	-271.34	161	-27.02	1066635	21	10362
dre-miR-214	c140017_g1_i3	2044	-283.87	157	-24.73	1061386	21	7270
dre-miR-214	c141035_g1_i5	2049	-276.96	157	-26.47	1048109	21	15889
dre-miR-214	c141035_g1_i3	2049	-276.96	157	-26.47	1063568	21	15931
dre-miR-214	c140017_g1_i5	2627	-371.12	157	-25.26	1055430	21	8708
dre-miR-216b	c144003_g4_i3	1060	-128.4	164	-21.34	8294259	22	15167
dre-miR-216b	c140860_g1_i4	1179	-142.07	155	-23.52	8293170	22	16160
dre-miR-216b	c143487_g1_i2	1201	-152.77	160	-25.12	8299827	22	11399
dre-miR-2185-5p	c141321_g1_i1	1024	-144.19	152	-27.55	11182632	21	16276
dre-miR-2185-5p	c140017_g1_i5	1038	-167	162	-33.74	11198150	21	8708
dre-miR-2185-5p	c143782_g1_i1	1046	-146.79	158	-25.47	11206085	21	4131
dre-miR-2185-5p	c135459_g2_i2	1072	-170.15	165	-26.07	11183731	21	7879
dre-miR-2185-5p	c135459_g2_i4	1072	-170.15	165	-26.07	11195135	21	7852
dre-miR-2185-5p	c135459_g2_i1	1072	-170.15	165	-26.07	11211675	21	7912
dre-miR-2185-5p	c140017_g1_i3	1183	-188.3	162	-33.74	11204106	21	7270
dre-miR-2188-5p	c135615_g1_i2	1029	-122.5	155	-21.48	11887859	21	11803
dre-miR-2188-5p	c114568_g1_i2	1167	-137.95	163	-20.75	11863161	21	4976
dre-miR-2188-5p	c114568_g1_i3	1167	-137.95	163	-20.75	11875910	21	4855
dre-miR-2188-5p	c137481_g4_i8	2213	-265.98	163	-20.9	11874380	21	5788
dre-miR-2188-5p	c137481_g4_i7	2355	-280.4	163	-20.9	11880710	21	5449
dre-miR-218a	c140635_g1_i2	1021	-115.89	152	-20.25	8331693	22	11985
dre-miR-218a	c140044_g3_i16	1033	-122.02	160	-20.74	8343410	22	13669
dre-miR-2192	c139626_g1_i1	1029	-111.81	159	-18.39	12003719	21	9791
dre-miR-2193	c122296_g1_i1	1014	-114.79	156	-21.73	12073316	24	5318
dre-miR-2193	c116779_g1_i1	1028	-111.86	161	-17.03	12052084	24	4939
dre-miR-2193	c141149_g1_i4	1028	-118.35	155	-18.36	12055787	24	5065
dre-miR-2193	c140990_g4_i1	1047	-128.61	163	-23.51	12056832	24	1356
dre-miR-2193	c129371_g1_i2	1050	-118.74	167	-20.32	12061605	24	6401
dre-miR-2193	c129371_g1_i1	1050	-118.74	167	-20.32	12075678	24	6386
dre-miR-2193	c141298_g1_i4	1152	-145.58	151	-22.6	12052402	24	4312
dre-miR-2193	c141149_g1_i3	1169	-132.67	155	-18.36	12047928	24	8249
dre-miR-2193	c116779_g1_i4	1176	-132.52	161	-20.66	12073788	24	4863
dre-miR-2193	c140734_g1_i5	1187	-136.5	156	-20.7	12046929	24	5730
dre-miR-2193	c157949_g1_i1	1191	-153.76	160	-21.58	12072745	24	1072
dre-miR-2193	c131371_g1_i2	1842	-230.23	168	-22.09	12062050	24	613
dre-miR-219-3p	c135952_g2_i5	1038	-151.53	164	-26.41	8399567	23	5255
dre-miR-219-3p	c135952_g2_i6	1038	-151.53	164	-26.41	8419463	23	5135
dre-miR-2195	c142971_g3_i4	1014	-138.33	150	-23.61	12129192	21	15322
dre-miR-2195	c116292_g1_i2	1015	-135.42	150	-22	12123927	21	5389
dre-miR-2196	c135170_g2_i3	1002	-160.3	149	-33.91	11706545	24	6671
dre-miR-2196	c135170_g2_i4	1002	-160.3	149	-33.91	11712971	24	6698
dre-miR-2196	c132917_g1_i4	1008	-147.29	150	-27.94	11689588	24	5925
dre-miR-2196	c132917_g1_i2	1008	-147.29	150	-27.94	11703041	24	5826
dre-miR-2196	c116195_g1_i3	1009	-157.1	155	-26.69	11705459	24	4323
dre-miR-2196	c116195_g1_i2	1009	-157.1	155	-26.69	11714636	24	4256
dre-miR-2196	c116195_g1_i1	1009	-157.1	155	-26.69	11718418	24	4281
dre-miR-2196	c140272_g1_i7	1010	-150.3	152	-28.18	11697226	24	4731
dre-miR-2196	c140272_g1_i9	1010	-150.3	152	-28.18	11718553	24	5619
dre-miR-2196	c143442_g2_i5	1014	-147.17	152	-23.26	11684328	24	6425
dre-miR-2196	c143442_g2_i2	1014	-147.17	152	-23.26	11691732	24	6401
dre-miR-2196	c143442_g2_i3	1014	-147.17	152	-23.26	11711982	24	6447
dre-miR-2196	c133136_g1_i4	1015	-147.73	157	-38.79	11706462	24	7869
dre-miR-2196	c135985_g1_i2	1016	-151.01	160	-25.8	11690401	24	4941
dre-miR-2196	c135985_g1_i1	1016	-151.01	160	-25.8	11705382	24	4857
dre-miR-2196	c142425_g3_i1	1017	-156.06	158	-28.28	11684829	24	10444
dre-miR-2196	c137799_g1_i1	1017	-162.15	149	-27.76	11715066	24	10777
dre-miR-2196	c132023_g1_i2	1020	-146.47	162	-25.95	11716099	24	7788
dre-miR-2196	c140569_g4_i1	1021	-132.43	155	-21.82	11689213	24	5826
dre-miR-2196	c140569_g4_i3	1021	-132.43	155	-21.82	11696456	24	5911
dre-miR-2196	c143853_g5_i2	1022	-152.27	159	-28.06	11691964	24	4451
dre-miR-2196	c121917_g1_i1	1022	-162.21	151	-33.52	11701975	24	14866
dre-miR-2196	c137601_g1_i5	1023	-157.82	163	-27.86	11719384	24	5826
dre-miR-2196	c138655_g1_i3	1026	-172.16	151	-29.54	11702735	24	4646
dre-miR-2196	c138655_g1_i1	1026	-172.16	151	-29.54	11711171	24	4634
dre-miR-2196	c140626_g2_i2	1027	-165.42	160	-28.31	11684243	24	9032
dre-miR-2196	c132099_g1_i11	1027	-139.13	152	-22.65	11712392	24	2418
dre-miR-2196	c138930_g5_i1	1030	-149.09	157	-27.12	11693172	24	6417
dre-miR-2196	c140648_g8_i4	1030	-142.44	153	-27.59	11699025	24	7053
dre-miR-2196	c140648_g8_i3	1030	-142.44	153	-27.59	11699792	24	6577
dre-miR-2196	c140648_g8_i2	1030	-142.44	153	-27.59	11713619	24	7234
dre-miR-2196	c115505_g1_i3	1032	-169.98	157	-30.33	11695839	24	4262
dre-miR-2196	c115505_g1_i1	1032	-169.98	157	-30.33	11706238	24	4181
dre-miR-2196	c115505_g1_i2	1032	-169.98	157	-30.33	11717622	24	4876
dre-miR-2196	c136945_g1_i7	1033	-139.31	167	-26.41	11686159	24	6409
dre-miR-2196	c140684_g2_i5	1033	-147.98	157	-25.15	11686691	24	6885
dre-miR-2196	c126579_g1_i2	1033	-152.28	158	-28.73	11687610	24	5406
dre-miR-2196	c136945_g1_i6	1033	-139.31	167	-26.41	11708856	24	6421
dre-miR-2196	c126579_g1_i1	1033	-152.28	158	-28.73	11711503	24	5427
dre-miR-2196	c138300_g8_i1	1034	-140.34	160	-25.15	11705023	24	5072
dre-miR-2196	c144165_g1_i7	1036	-137.94	161	-27.16	11689171	24	15611
dre-miR-2196	c142031_g1_i1	1036	-148.78	158	-31.92	11693915	24	8010
dre-miR-2196	c144165_g1_i8	1036	-137.94	161	-27.16	11694036	24	15638
dre-miR-2196	c141094_g1_i6	1036	-162.16	163	-29.83	11703705	24	4067
dre-miR-2196	c142031_g1_i4	1036	-148.78	158	-31.92	11707808	24	7836
dre-miR-2196	c144165_g1_i4	1036	-137.94	161	-27.16	11714680	24	15499
dre-miR-2196	c141663_g1_i1	1037	-145.51	154	-25.84	11693126	24	6636
dre-miR-2196	c140603_g9_i3	1037	-136.4	161	-21.81	11711491	24	5628
dre-miR-2196	c116300_g2_i4	1039	-158.31	155	-26.46	11702952	24	5083
dre-miR-2196	c142563_g4_i2	1039	-143.33	157	-30.43	11707313	24	10297
dre-miR-2196	c136375_g2_i4	1039	-155.12	159	-29.72	11710275	24	7650
dre-miR-2196	c142024_g1_i2	1040	-160.27	157	-28.82	11694281	24	5878
dre-miR-2196	c133394_g2_i1	1040	-156.32	162	-26	11715283	24	5555
dre-miR-2196	c143871_g1_i1	1041	-149.86	158	-29.37	11684844	24	1708
dre-miR-2196	c123798_g1_i1	1041	-166.23	156	-31.47	11696433	24	3068
dre-miR-2196	c125282_g1_i6	1041	-147.07	156	-27.03	11703383	24	3757
dre-miR-2196	c140143_g1_i3	1042	-151.08	160	-25.98	11684872	24	12715
dre-miR-2196	c140044_g3_i12	1042	-147.04	172	-30.03	11691413	24	12335
dre-miR-2196	c142479_g3_i4	1043	-163.12	160	-30.66	11711115	24	10362
dre-miR-2196	c143403_g1_i3	1044	-144.17	167	-23.98	11710461	24	14226
dre-miR-2196	c136310_g1_i2	1045	-164.88	165	-29.46	11708797	24	5892
dre-miR-2196	c140987_g1_i4	1046	-151.25	161	-25.02	11710649	24	16713
dre-miR-2196	c140987_g1_i1	1046	-151.25	161	-25.02	11717126	24	15839
dre-miR-2196	c142971_g3_i4	1048	-177.79	161	-35.72	11699112	24	15322
dre-miR-2196	c131553_g1_i3	1048	-146.35	156	-25	11706351	24	8355
dre-miR-2196	c142298_g1_i1	1049	-169.78	163	-28.21	11692167	24	5440
dre-miR-2196	c142298_g1_i4	1049	-169.78	163	-28.21	11702464	24	5461
dre-miR-2196	c135751_g2_i3	1050	-147.76	166	-24.9	11686767	24	7481
dre-miR-2196	c135751_g2_i2	1050	-147.76	166	-24.9	11700830	24	7460
dre-miR-2196	c139679_g1_i4	1050	-177.26	162	-35.3	11717785	24	9431
dre-miR-2196	c133434_g1_i4	1051	-168.5	164	-35.33	11686259	24	7815
dre-miR-2196	c142289_g1_i1	1052	-158.95	164	-31.18	11709113	24	9104
dre-miR-2196	c136633_g1_i3	1053	-163.97	160	-31.41	11717065	24	2284
dre-miR-2196	c134750_g1_i1	1055	-155.9	169	-24.19	11686148	24	7615
dre-miR-2196	c122308_g1_i1	1055	-151.45	161	-27	11697920	24	3738
dre-miR-2196	c141070_g1_i4	1056	-171.8	164	-30.62	11691257	24	7242
dre-miR-2196	c135306_g1_i3	1056	-140.47	161	-24.51	11698789	24	4129
dre-miR-2196	c140044_g3_i16	1056	-147.34	163	-30.83	11712370	24	13669
dre-miR-2196	c139832_g2_i4	1057	-144.36	159	-24.43	11690493	24	6213
dre-miR-2196	c138568_g2_i7	1057	-158.93	165	-29.54	11699385	24	15529
dre-miR-2196	c138568_g2_i4	1057	-158.93	165	-29.54	11718167	24	15271
dre-miR-2196	c141854_g1_i1	1059	-178.85	161	-31.07	11694795	24	8854
dre-miR-2196	c131028_g1_i3	1060	-144.92	159	-23.63	11700055	24	3500
dre-miR-2196	c141137_g6_i2	1061	-138.18	166	-26.75	11690580	24	7084
dre-miR-2196	c141137_g6_i1	1061	-138.18	166	-26.75	11712087	24	6918
dre-miR-2196	c141137_g6_i3	1061	-138.18	166	-26.75	11717476	24	6749
dre-miR-2196	c140759_g1_i2	1064	-154.22	167	-27.22	11715835	24	10438
dre-miR-2196	c135413_g3_i5	1065	-166.16	173	-32.2	11715109	24	9086
dre-miR-2196	c139714_g1_i1	1075	-162.76	163	-30.94	11717985	24	16004
dre-miR-2196	c140449_g1_i6	1077	-161.62	162	-30.58	11688575	24	6689
dre-miR-2196	c140449_g1_i4	1077	-161.62	162	-30.58	11698726	24	7520
dre-miR-2196	c140449_g1_i3	1077	-161.62	162	-30.58	11710053	24	6620
dre-miR-2196	c140449_g1_i1	1077	-161.62	162	-30.58	11710802	24	6737
dre-miR-2196	c127576_g1_i1	1079	-174.07	170	-29.32	11689908	24	5204
dre-miR-2196	c136489_g2_i2	1097	-169.43	177	-28.62	11711630	24	4241
dre-miR-2196	c140376_g1_i10	1135	-178.78	173	-28.32	11706824	24	6339
dre-miR-2196	c141626_g1_i2	1140	-175.48	151	-28.48	11696655	24	13230
dre-miR-2196	c141626_g1_i4	1140	-175.48	151	-28.48	11704329	24	13239
dre-miR-2196	c140272_g1_i2	1157	-166.83	152	-28.18	11703219	24	6220
dre-miR-2196	c140320_g1_i6	1158	-187.62	154	-26.73	11685361	24	8526
dre-miR-2196	c140320_g1_i3	1158	-187.62	154	-26.73	11704119	24	10608
dre-miR-2196	c140320_g1_i8	1158	-187.62	154	-26.73	11711308	24	8547
dre-miR-2196	c140320_g1_i1	1158	-187.62	154	-26.73	11714406	24	8496
dre-miR-2196	c139613_g1_i7	1161	-182.66	149	-34.39	11703369	24	9239
dre-miR-2196	c138907_g1_i4	1162	-183.69	156	-28.83	11690758	24	12870
dre-miR-2196	c138216_g1_i1	1168	-188.87	156	-32.6	11705680	24	9641
dre-miR-2196	c130310_g2_i1	1174	-173.76	159	-27.64	11713779	24	4307
dre-miR-2196	c137088_g1_i1	1175	-168.67	154	-23.97	11704793	24	4450
dre-miR-2196	c137088_g1_i2	1175	-168.67	154	-23.97	11718740	24	4841
dre-miR-2196	c138591_g1_i2	1178	-183.76	152	-28.61	11685671	24	8154
dre-miR-2196	c134202_g1_i2	1182	-163.86	167	-24.6	11683858	24	4503
dre-miR-2196	c141642_g1_i4	1182	-179.76	160	-28.96	11711103	24	12968
dre-miR-2196	c136699_g1_i8	1183	-200.47	170	-34.46	11690194	24	9257
dre-miR-2196	c115679_g1_i1	1183	-174.55	167	-31.3	11690734	24	5963
dre-miR-2196	c140044_g3_i3	1187	-167.7	172	-30.03	11684291	24	13083
dre-miR-2196	c140044_g3_i5	1187	-167.7	172	-30.03	11699458	24	13353
dre-miR-2196	c141094_g1_i3	1188	-181.02	163	-29.83	11689673	24	4236
dre-miR-2196	c139264_g1_i1	1188	-178.42	157	-28.8	11699374	24	14411
dre-miR-2196	c135890_g1_i3	1190	-171.06	156	-34.03	11692374	24	5850
dre-miR-2196	c127645_g1_i3	1191	-187.8	164	-31.14	11704061	24	5572
dre-miR-2196	c140585_g1_i3	1195	-174.13	170	-28.73	11699502	24	12911
dre-miR-2196	c134479_g1_i5	1196	-179.33	172	-28.09	11711626	24	3582
dre-miR-2196	c141997_g9_i2	1197	-157.27	163	-23.2	11712586	24	6414
dre-miR-2196	c142298_g1_i3	1198	-188.84	163	-28.21	11700609	24	5364
dre-miR-2196	c129840_g1_i2	1199	-180.82	159	-24.65	11710280	24	7130
dre-miR-2196	c129840_g1_i5	1199	-180.82	159	-24.65	11714825	24	7066
dre-miR-2196	c133442_g1_i1	1202	-182.56	166	-29.98	11684083	24	3234
dre-miR-2196	c143067_g1_i3	1202	-190.52	165	-27.95	11690998	24	8862
dre-miR-2196	c143067_g1_i2	1202	-190.52	165	-27.95	11695929	24	8902
dre-miR-2196	c140361_g1_i2	1203	-172.86	157	-27.72	11705671	24	6542
dre-miR-2196	c141921_g2_i3	1203	-193.03	164	-31.02	11718611	24	13321
dre-miR-2196	c134000_g2_i6	1204	-166.78	158	-28.26	11719290	24	3587
dre-miR-2196	c140890_g3_i3	1209	-175.41	160	-28.15	11708626	24	8911
dre-miR-2196	c131028_g1_i1	1210	-168.17	159	-23.63	11691020	24	3037
dre-miR-2196	c133328_g1_i2	1211	-161.91	171	-25.31	11715725	24	4742
dre-miR-2196	c144319_g1_i8	1213	-183.63	172	-29.5	11712420	24	6333
dre-miR-2196	c142459_g3_i2	1217	-174.52	163	-26.61	11691839	24	15674
dre-miR-2196	c139845_g1_i3	1222	-170.71	161	-27.05	11713126	24	6914
dre-miR-2196	c138907_g1_i2	1304	-217.44	156	-33.75	11695039	24	12913
dre-miR-2196	c138907_g1_i3	1304	-217.44	156	-33.75	11696849	24	12903
dre-miR-2196	c138907_g1_i1	1304	-217.44	156	-33.75	11716824	24	12957
dre-miR-2196	c141354_g1_i4	1315	-164.57	164	-24.32	11709573	24	6809
dre-miR-2196	c142147_g1_i8	1319	-194.87	153	-29.92	11713207	24	7334
dre-miR-2196	c132376_g1_i4	1327	-202.78	163	-25.61	11691461	24	4903
dre-miR-2196	c140650_g1_i3	1327	-181.02	155	-30.06	11712961	24	10971
dre-miR-2196	c140431_g2_i1	1329	-197.82	160	-29.1	11707506	24	7173
dre-miR-2196	c140431_g2_i2	1329	-197.82	160	-29.1	11710259	24	7236
dre-miR-2196	c137365_g1_i8	1329	-202.82	155	-29.13	11711330	24	5573
dre-miR-2196	c139005_g1_i3	1330	-209.96	162	-32.66	11718645	24	6504
dre-miR-2196	c134572_g1_i3	1334	-195.72	158	-31.23	11697261	24	8035
dre-miR-2196	c131958_g1_i2	1338	-193.28	155	-25.27	11705816	24	4024
dre-miR-2196	c138329_g1_i4	1340	-201.99	157	-26.54	11716341	24	14524
dre-miR-2196	c127673_g1_i6	1341	-209.66	157	-28.27	11686257	24	3262
dre-miR-2196	c132063_g1_i2	1345	-200.07	165	-29.36	11692068	24	11216
dre-miR-2196	c132063_g1_i1	1345	-200.07	165	-29.36	11715095	24	11228
dre-miR-2196	c140361_g1_i1	1350	-196.1	157	-27.72	11706826	24	8064
dre-miR-2196	c123301_g1_i2	1351	-191.45	163	-27.95	11715055	24	9311
dre-miR-2196	c141070_g1_i8	1356	-218.47	164	-30.62	11709150	24	9372
dre-miR-2196	c136961_g1_i1	1356	-187.3	161	-25.1	11718090	24	7357
dre-miR-2196	c136633_g1_i2	1362	-214.16	165	-31.41	11703078	24	2889
dre-miR-2196	c138419_g3_i2	1448	-205.69	153	-25.85	11711601	24	8521
dre-miR-2196	c140320_g1_i2	1456	-232.47	157	-26.73	11710238	24	10901
dre-miR-2196	c141035_g1_i5	1460	-229.56	153	-27.83	11692589	24	15889
dre-miR-2196	c134876_g1_i2	1468	-222.98	167	-26.33	11691103	24	10150
dre-miR-2196	c142222_g5_i1	1470	-204.97	151	-23.68	11709726	24	8909
dre-miR-2196	c140738_g1_i1	1476	-218.46	164	-25.44	11684684	24	11166
dre-miR-2196	c142238_g2_i1	1477	-209.09	165	-24.82	11711550	24	15561
dre-miR-2196	c141321_g1_i1	1480	-243.58	162	-30.12	11684392	24	16276
dre-miR-2196	c139005_g1_i1	1483	-230.46	162	-32.66	11710724	24	6360
dre-miR-2196	c119203_g1_i3	1502	-218.97	162	-27.45	11718562	24	8438
dre-miR-2196	c138377_g1_i4	1510	-218.3	161	-25.45	11713305	24	5782
dre-miR-2196	c129117_g1_i1	1523	-234.17	174	-28.8	11696029	24	7172
dre-miR-2196	c141035_g1_i3	1609	-248.92	153	-27.83	11708048	24	15931
dre-miR-2196	c105929_g1_i4	1651	-241.01	158	-35.26	11712771	24	10601
dre-miR-2196	c141070_g1_i13	1652	-271.69	164	-33.19	11714655	24	10507
dre-miR-2196	c140899_g1_i6	1665	-258.6	163	-29.41	11707118	24	5560
dre-miR-2196	c140860_g1_i4	1689	-235.17	171	-27.55	11697970	24	16160
dre-miR-2196	c144263_g2_i7	1750	-249.58	154	-26.07	11695691	24	14807
dre-miR-2196	c140969_g1_i3	1774	-245.75	162	-27.85	11684510	24	12599
dre-miR-2196	c142611_g1_i1	1787	-264.36	170	-29.92	11684354	24	18600
dre-miR-2196	c142692_g1_i1	1819	-250.32	170	-25.28	11713894	24	9105
dre-miR-2196	c140069_g1_i1	1859	-293.18	172	-32.61	11717946	24	9643
dre-miR-2196	c142736_g1_i3	1929	-293.44	168	-31.06	11713249	24	7627
dre-miR-2196	c143487_g1_i2	2082	-330.97	161	-29.61	11704627	24	11399
dre-miR-2196	c142875_g1_i3	2211	-330.4	167	-28.94	11713634	24	14551
dre-miR-2196	c143992_g1_i5	2224	-317.15	156	-26.82	11713533	24	16784
dre-miR-2196	c132798_g1_i3	2248	-334.8	162	-28.83	11706666	24	3606
dre-miR-2196	c135608_g1_i1	2248	-281.97	162	-25.88	11713169	24	8447
dre-miR-2196	c132798_g1_i1	2389	-355.27	162	-28.83	11719113	24	3833
dre-miR-2196	c132897_g1_i1	2400	-326.45	175	-27.02	11710400	24	8280
dre-miR-2196	c133560_g1_i2	2515	-377.53	161	-27.66	11697553	24	14202
dre-miR-2196	c133560_g1_i3	2515	-377.53	161	-27.66	11711543	24	14693
dre-miR-2196	c142147_g1_i7	2647	-381.82	164	-29.92	11685169	24	18936
dre-miR-2196	c143992_g1_i7	2972	-431.84	165	-28.88	11707833	24	17464
dre-miR-221-3p	c133915_g1_i16	1023	-151.82	152	-25.91	1233453	23	5686
dre-miR-221-3p	c142147_g1_i7	1066	-133.25	168	-24.1	1219889	23	18936
dre-miR-221-5p	c144165_g1_i3	1024	-131.78	157	-22.74	1208279	26	15603
dre-miR-221-5p	c144165_g1_i10	1024	-131.78	157	-22.74	1212362	26	15785
dre-miR-221-5p	c144165_g1_i9	1024	-131.78	157	-22.74	1216160	26	15758
dre-miR-221-5p	c139838_g1_i2	1046	-126.35	171	-21.88	1207568	26	10548
dre-miR-221-5p	c139838_g1_i3	1046	-126.35	171	-21.88	1215722	26	10804
dre-miR-221-5p	c139672_g8_i1	1047	-129.7	169	-22.39	1187471	26	2340
dre-miR-221-5p	c138568_g2_i7	1075	-153.93	176	-29.43	1198265	26	15529
dre-miR-221-5p	c138568_g2_i4	1075	-153.93	176	-29.43	1217047	26	15271
dre-miR-221-5p	c138848_g1_i2	1076	-131.19	165	-22.97	1198177	26	10372
dre-miR-221-5p	c142831_g3_i2	1187	-161.68	165	-25.81	1197650	26	15890
dre-miR-221-5p	c135615_g1_i2	1689	-242.24	171	-27.34	1207539	26	11803
dre-miR-222a-5p	c140320_g1_i2	1015	-138.39	158	-25.53	1280798	23	10901
dre-miR-222a-5p	c140320_g1_i3	1016	-135.18	158	-22.32	1274679	23	10608
dre-miR-222a-5p	c133560_g1_i3	1016	-132.73	151	-26.61	1282103	23	14693
dre-miR-222a-5p	c136200_g2_i2	1020	-133.9	152	-21.86	1255215	23	7476
dre-miR-222a-5p	c144182_g2_i5	1021	-150.17	161	-25.82	1274463	23	8977
dre-miR-222a-5p	c143992_g1_i5	1030	-119.49	161	-20.33	1284093	23	16784
dre-miR-222a-5p	c142498_g1_i2	1060	-136.36	160	-24.97	1279706	23	9707
dre-miR-222a-5p	c142611_g1_i1	1164	-164.2	155	-29.52	1254914	23	18600
dre-miR-222a-5p	c144161_g1_i3	1174	-150.61	156	-23.77	1255353	23	14743
dre-miR-222a-5p	c142808_g2_i8	1183	-156.31	154	-24.08	1258229	23	13201
dre-miR-222a-5p	c137136_g1_i2	1336	-179.26	164	-25.82	1272889	23	8586
dre-miR-222a-5p	c137136_g1_i3	1336	-179.26	164	-25.82	1283631	23	8841
dre-miR-222a-5p	c137136_g1_i1	1336	-179.26	164	-25.82	1286843	23	8815
dre-miR-222a-5p	c137136_g1_i5	1336	-179.26	164	-25.82	1287290	23	8628
dre-miR-222a-5p	c142147_g1_i7	1781	-241.11	165	-24.9	1255729	23	18936
dre-miR-22a-3p	c139457_g2_i7	1054	-122.89	158	-20.53	3409069	22	15103
dre-miR-22a-3p	c138329_g1_i4	1330	-173.65	156	-23.43	3437301	22	14524
dre-miR-22a-3p	c141321_g1_i1	1339	-167.19	158	-26.79	3405352	22	16276
dre-miR-22a-5p	c142842_g3_i7	1017	-117.7	151	-19.02	3378825	22	9128
dre-miR-22a-5p	c142842_g3_i1	1017	-117.7	151	-19.02	3382552	22	9074
dre-miR-22a-5p	c138329_g1_i4	1019	-117.05	155	-20.82	3401461	22	14524
dre-miR-22a-5p	c138377_g1_i4	1025	-124.89	163	-22.16	3398425	22	5782
dre-miR-22a-5p	c140172_g3_i7	1026	-115.43	164	-20.61	3398813	22	3701
dre-miR-22a-5p	c138922_g1_i2	1032	-124.19	156	-19.68	3381917	22	7960
dre-miR-22a-5p	c138922_g1_i1	1032	-124.19	156	-19.68	3402688	22	7810
dre-miR-22a-5p	c136708_g1_i1	1045	-128.9	167	-24.75	3400004	22	6829
dre-miR-22a-5p	c142919_g1_i2	1049	-125.95	170	-22.88	3373247	22	6126
dre-miR-22a-5p	c141579_g2_i2	1049	-113.23	154	-17.83	3382299	22	10799
dre-miR-22a-5p	c140860_g1_i4	1051	-126.15	159	-20.35	3383090	22	16160
dre-miR-22a-5p	c138549_g1_i3	1149	-144.53	153	-21.59	3392982	22	8242
dre-miR-22a-5p	c142736_g1_i3	1152	-148.54	149	-23.13	3398369	22	7627
dre-miR-22a-5p	c133560_g1_i2	1166	-136.46	152	-18.95	3382673	22	14202
dre-miR-22a-5p	c133560_g1_i3	1166	-136.46	152	-18.95	3396663	22	14693
dre-miR-22a-5p	c140172_g3_i3	1175	-135.27	164	-20.61	3399797	22	5956
dre-miR-22a-5p	c142253_g2_i1	1205	-168.9	162	-25.84	3374921	22	7283
dre-miR-22a-5p	c142692_g1_i1	1307	-157.61	151	-19.86	3399014	22	9105
dre-miR-22a-5p	c132897_g1_i1	1311	-149.31	158	-21.36	3395520	22	8280
dre-miR-22a-5p	c132063_g1_i2	1313	-161.87	155	-23.12	3377188	22	11216
dre-miR-22a-5p	c132063_g1_i1	1313	-161.87	155	-23.12	3400215	22	11228
dre-miR-22a-5p	c133774_g1_i3	1330	-169.84	156	-25.16	3369174	22	9611
dre-miR-22a-5p	c138549_g1_i4	1459	-179.39	156	-21.59	3371213	22	10808
dre-miR-22b-3p	c121650_g1_i2	1006	-133.41	152	-26.62	3488593	22	4828
dre-miR-22b-3p	c121650_g1_i1	1006	-133.41	152	-26.62	3510528	22	4963
dre-miR-22b-3p	c127546_g2_i1	1008	-141.54	159	-23.81	3480763	22	8154
dre-miR-22b-3p	c136509_g1_i1	1029	-148.95	151	-24.96	3495373	22	8202
dre-miR-22b-3p	c136509_g1_i3	1029	-148.95	151	-24.96	3505614	22	7993
dre-miR-22b-3p	c139714_g1_i1	1034	-145.72	156	-26.07	3510625	22	16004
dre-miR-22b-3p	c142147_g1_i7	1042	-150.57	162	-25.74	3477809	22	18936
dre-miR-22b-3p	c142831_g3_i2	1056	-132.33	162	-21.71	3491410	22	15890
dre-miR-22b-3p	c139457_g2_i7	1061	-146.48	158	-26.4	3480749	22	15103
dre-miR-22b-3p	c140735_g1_i1	1175	-149.25	154	-22.81	3495753	22	15171
dre-miR-22b-3p	c138329_g1_i4	1353	-188.24	164	-29.96	3508981	22	14524
dre-miR-22b-3p	c141321_g1_i1	1364	-168.18	163	-27.8	3477032	22	16276
dre-miR-22b-5p	c136046_g1_i9	1010	-133.38	155	-22.97	3453008	22	3969
dre-miR-22b-5p	c136046_g1_i11	1010	-133.38	155	-22.97	3460622	22	4198
dre-miR-22b-5p	c138570_g2_i4	1018	-122.06	158	-19.61	3445410	22	10112
dre-miR-22b-5p	c138570_g2_i1	1018	-122.06	158	-19.61	3449808	22	10121
dre-miR-22b-5p	c138570_g2_i2	1018	-122.06	158	-19.61	3458204	22	10732
dre-miR-22b-5p	c138570_g2_i5	1018	-122.06	158	-19.61	3472690	22	10238
dre-miR-22b-5p	c138329_g1_i4	1019	-122.02	159	-22.57	3473141	22	14524
dre-miR-22b-5p	c132897_g1_i1	1025	-122.99	156	-21.4	3467200	22	8280
dre-miR-22b-5p	c138568_g2_i10	1035	-129.57	156	-20.05	3467571	22	7244
dre-miR-22b-5p	c138568_g2_i2	1035	-129.57	156	-20.05	3469409	22	7468
dre-miR-22b-5p	c138549_g1_i4	1051	-127.33	161	-22.25	3442893	22	10808
dre-miR-22b-5p	c139027_g1_i3	1057	-119.73	164	-18.51	3475248	22	6116
dre-miR-22b-5p	c138570_g2_i3	1160	-138.06	158	-19.61	3442558	22	11243
dre-miR-22b-5p	c139264_g1_i1	1167	-155.44	159	-26.76	3456174	22	14411
dre-miR-22b-5p	c140172_g3_i3	1177	-148.72	156	-22.41	3471477	22	5956
dre-miR-22b-5p	c142875_g1_i3	1180	-146.41	162	-22.34	3470434	22	14551
dre-miR-22b-5p	c139027_g1_i9	1200	-137.17	164	-18.51	3463107	22	7099
dre-miR-22b-5p	c141579_g2_i2	1205	-139.03	160	-19.35	3453979	22	10799
dre-miR-22b-5p	c142253_g2_i1	1220	-161.63	166	-25.44	3446601	22	7283
dre-miR-22b-5p	c133560_g1_i2	1315	-156.72	155	-23.26	3454353	22	14202
dre-miR-22b-5p	c133560_g1_i3	1315	-156.72	155	-23.26	3468343	22	14693
dre-miR-22b-5p	c138568_g2_i7	1317	-163.19	156	-20.05	3456185	22	15529
dre-miR-22b-5p	c138568_g2_i4	1317	-163.19	156	-20.05	3474967	22	15271
dre-miR-22b-5p	c144604_g3_i4	1348	-160.51	162	-19.76	3464015	22	7294
dre-miR-22b-5p	c142692_g1_i1	1451	-189.18	156	-24.39	3470694	22	9105
dre-miR-22b-5p	c139714_g1_i1	1470	-178.78	157	-21.41	3474785	22	16004
dre-miR-22b-5p	c140860_g1_i4	1478	-170.16	159	-21.81	3454770	22	16160
dre-miR-24	c140759_g1_i2	1003	-128.75	146	-22.64	3687675	22	10438
dre-miR-24	c140987_g1_i4	1012	-140.63	151	-26.96	3682489	22	16713
dre-miR-24	c140987_g1_i1	1012	-140.63	151	-26.96	3688966	22	15839
dre-miR-24	c140069_g1_i1	1019	-141.03	155	-23.42	3689786	22	9643
dre-miR-24	c142479_g3_i4	1026	-148.87	155	-26.45	3682955	22	10362
dre-miR-24	c141215_g1_i5	1044	-151.64	164	-27.51	3664981	22	11131
dre-miR-24	c137136_g1_i2	1045	-163.07	163	-28.19	3674169	22	8586
dre-miR-24	c137136_g1_i3	1045	-163.07	163	-28.19	3684911	22	8841
dre-miR-24	c137136_g1_i1	1045	-163.07	163	-28.19	3688123	22	8815
dre-miR-24	c137136_g1_i5	1045	-163.07	163	-28.19	3688570	22	8628
dre-miR-24	c142586_g3_i3	1050	-153.87	158	-27.21	3689763	22	11115
dre-miR-24	c144182_g2_i5	1076	-174.8	175	-32.68	3675743	22	8977
dre-miR-24	c138377_g2_i1	1168	-175.1	157	-28.91	3664943	22	5634
dre-miR-24	c138377_g2_i4	1168	-175.1	157	-28.91	3670937	22	5646
dre-miR-24	c142586_g4_i1	1169	-161.13	152	-24.69	3677039	22	12109
dre-miR-24	c115942_g1_i1	1174	-177.69	160	-26.76	3657530	22	9676
dre-miR-24	c107914_g1_i1	1185	-166.78	160	-25.98	3674568	22	8823
dre-miR-24	c139182_g1_i2	1199	-172.44	164	-28.69	3685472	22	6133
dre-miR-24	c144020_g2_i7	1205	-172.66	163	-26.32	3660973	22	12947
dre-miR-24	c144020_g2_i4	1205	-172.66	163	-26.32	3690104	22	13049
dre-miR-24	c144604_g2_i1	1223	-175.47	160	-26.94	3683227	22	7276
dre-miR-24	c144604_g2_i5	1229	-170.73	160	-25.87	3667198	22	7267
dre-miR-24	c141321_g1_i1	1350	-190.29	169	-29.69	3656232	22	16276
dre-miR-24	c140017_g1_i5	1353	-199.55	160	-27.53	3671750	22	8708
dre-miR-24	c143674_g1_i2	2228	-326.44	166	-27.72	3671446	22	19154
dre-miR-25-3p	c142459_g3_i2	1016	-150.2	151	-24.93	3735359	22	15674
dre-miR-25-5p	c140982_g1_i6	1007	-183.92	148	-29.31	3700332	23	5860
dre-miR-25-5p	c142433_g2_i3	1014	-176.38	155	-29.61	3692415	23	6313
dre-miR-25-5p	c142433_g2_i6	1014	-176.38	155	-29.61	3725634	23	6172
dre-miR-25-5p	c139869_g1_i1	1019	-188.48	151	-38.21	3709400	23	8019
dre-miR-25-5p	c139869_g1_i7	1019	-188.48	151	-38.21	3723899	23	7993
dre-miR-25-5p	c143031_g1_i4	1024	-177.88	153	-33.98	3715114	23	7995
dre-miR-25-5p	c142036_g5_i11	1028	-172.17	156	-28.99	3700927	23	7453
dre-miR-25-5p	c142036_g5_i6	1028	-172.17	156	-28.99	3704889	23	7220
dre-miR-25-5p	c142036_g5_i7	1028	-172.17	156	-28.99	3717951	23	7829
dre-miR-25-5p	c137189_g1_i2	1038	-168.62	155	-27.43	3712980	23	3465
dre-miR-25-5p	c140635_g1_i2	1043	-190.76	164	-33.74	3708333	23	11985
dre-miR-25-5p	c143482_g3_i2	1046	-177.12	154	-31.04	3703310	23	7628
dre-miR-25-5p	c126920_g1_i2	1049	-177.89	160	-26.9	3726258	23	5480
dre-miR-25-5p	c140017_g1_i3	1052	-178.96	163	-29.59	3713546	23	7270
dre-miR-25-5p	c115579_g3_i1	1059	-188.82	167	-34.94	3727254	23	3266
dre-miR-25-5p	c139919_g3_i1	1069	-184.76	174	-32.02	3710155	23	4158
dre-miR-25-5p	c139919_g3_i5	1070	-184.85	174	-32.02	3713518	23	4170
dre-miR-25-5p	c142350_g1_i5	1166	-219.51	162	-33.9	3703522	23	7656
dre-miR-25-5p	c142350_g1_i1	1166	-219.51	162	-33.9	3719273	23	7999
dre-miR-25-5p	c140472_g6_i12	1171	-195.72	156	-27.64	3693248	23	6059
dre-miR-25-5p	c139118_g1_i1	1172	-198.65	154	-33.88	3711913	23	4702
dre-miR-25-5p	c143853_g6_i1	1193	-196.94	159	-27.34	3709893	23	3318
dre-miR-25-5p	c142808_g2_i8	1241	-225.47	164	-32.88	3695349	23	13201
dre-miR-25-5p	c132152_g1_i4	1321	-234.92	165	-27.7	3696888	23	5693
dre-miR-25-5p	c132152_g1_i1	1321	-234.92	165	-27.7	3706199	23	6362
dre-miR-25-5p	c134972_g2_i2	1368	-225.45	164	-31.07	3720464	23	5212
dre-miR-25-5p	c144412_g1_i1	1437	-238.51	153	-27.91	3722456	23	5684
dre-miR-25-5p	c142586_g3_i3	1624	-314.82	157	-37.06	3725603	23	11115
dre-miR-25-5p	c140017_g1_i5	1660	-295.36	163	-32.98	3707590	23	8708
dre-miR-27a-3p	c142832_g3_i5	1018	-140.68	151	-22.29	3972352	22	11159
dre-miR-27a-3p	c115679_g1_i1	1019	-121.46	158	-20.53	3949294	22	5963
dre-miR-27a-3p	c138026_g1_i5	1042	-130.41	161	-23.8	3974638	22	4521
dre-miR-27a-3p	c134026_g1_i1	1091	-130.43	161	-20.66	3953572	22	6798
dre-miR-27a-3p	c134026_g1_i4	1091	-130.43	161	-20.66	3963305	22	6877
dre-miR-27a-3p	c134026_g1_i5	1091	-130.43	161	-20.66	3977238	22	6829
dre-miR-27a-3p	c142459_g3_i2	1181	-154.61	155	-25.2	3950399	22	15674
dre-miR-27a-3p	c125928_g1_i1	1199	-154.54	159	-23.47	3956034	22	8877
dre-miR-27a-3p	c142009_g1_i8	1596	-212.64	163	-23.69	3959729	22	12031
dre-miR-27a-3p	c142009_g1_i5	1596	-212.64	163	-23.69	3962162	22	13098
dre-miR-27b-3p	c128470_g1_i1	1011	-131.81	152	-23.91	4019110	22	5336
dre-miR-27b-3p	c142832_g3_i5	1028	-142.98	153	-25.07	4044032	22	11159
dre-miR-27b-3p	c138026_g1_i5	1050	-135.71	161	-25.24	4046318	22	4521
dre-miR-27b-3p	c134026_g1_i1	1090	-138.92	164	-24.5	4025252	22	6798
dre-miR-27b-3p	c134026_g1_i4	1090	-138.92	164	-24.5	4034985	22	6877
dre-miR-27b-3p	c134026_g1_i5	1090	-138.92	164	-24.5	4048918	22	6829
dre-miR-27b-3p	c142459_g3_i2	1178	-142.26	153	-22.4	4022079	22	15674
dre-miR-27b-3p	c115679_g1_i1	1316	-162.17	158	-25.45	4020974	22	5963
dre-miR-27b-3p	c142009_g1_i8	1457	-187.61	159	-26.62	4031409	22	12031
dre-miR-27b-3p	c142009_g1_i5	1457	-187.61	159	-26.62	4033842	22	13098
dre-miR-27b-3p	c125928_g1_i1	1487	-187.76	157	-23.93	4027714	22	8877
dre-miR-27c-3p	c142611_g1_i1	1019	-124.35	157	-21.77	4086274	21	18600
dre-miR-27c-3p	c115679_g1_i1	1022	-129.85	154	-29.16	4092654	21	5963
dre-miR-27c-3p	c138026_g1_i5	1047	-122.88	160	-19.09	4117998	21	4521
dre-miR-27c-3p	c134026_g1_i1	1073	-133.49	161	-22.22	4096932	21	6798
dre-miR-27c-3p	c134026_g1_i4	1073	-133.49	161	-22.22	4106665	21	6877
dre-miR-27c-3p	c134026_g1_i5	1073	-133.49	161	-22.22	4120598	21	6829
dre-miR-27c-3p	c142009_g1_i8	1172	-143.52	159	-23.78	4103089	21	12031
dre-miR-27c-3p	c142009_g1_i5	1172	-143.52	159	-23.78	4105522	21	13098
dre-miR-27c-3p	c142459_g3_i2	1173	-136.15	152	-20.17	4093759	21	15674
dre-miR-27d	c115679_g1_i1	1020	-115.01	155	-20.35	4128494	22	5963
dre-miR-27d	c142832_g3_i5	1022	-131.64	156	-20.5	4151552	22	11159
dre-miR-27d	c138026_g1_i5	1057	-132.35	161	-22.95	4153838	22	4521
dre-miR-27d	c134026_g1_i1	1076	-120.91	160	-18.73	4132772	22	6798
dre-miR-27d	c134026_g1_i4	1076	-120.91	160	-18.73	4142505	22	6877
dre-miR-27d	c134026_g1_i5	1076	-120.91	160	-18.73	4156438	22	6829
dre-miR-27d	c142459_g3_i2	1181	-139.48	158	-19.64	4129599	22	15674
dre-miR-27d	c125928_g1_i1	1205	-151.01	156	-24.31	4135234	22	8877
dre-miR-27d	c142009_g1_i8	1462	-189.38	160	-23.93	4138929	22	12031
dre-miR-27d	c142009_g1_i5	1462	-189.38	160	-23.93	4141362	22	13098
dre-miR-27e	c125928_g1_i1	1206	-149.03	156	-22.43	4171074	22	8877
dre-miR-27e	c142009_g1_i8	1455	-180.97	158	-21.69	4174769	22	12031
dre-miR-27e	c142009_g1_i5	1455	-180.97	158	-21.69	4177202	22	13098
dre-miR-27e	c142459_g3_i2	1750	-227.43	157	-23.19	4165439	22	15674
dre-miR-29a	c143367_g1_i1	1038	-122.75	154	-18.61	4252140	22	14497
dre-miR-29a	c143367_g1_i2	1038	-122.75	154	-18.61	4257166	22	14263
dre-miR-29a	c137481_g4_i7	2897	-342.55	162	-24.61	4246790	22	5449
dre-miR-29a	c137481_g4_i8	3190	-390	162	-24.61	4240460	22	5788
dre-miR-29b	c137481_g4_i7	2638	-319.32	166	-25.76	4210950	22	5449
dre-miR-29b	c137481_g4_i8	2923	-354.3	166	-25.76	4204620	22	5788
dre-miR-30a-3p	c142147_g1_i7	1041	-136.16	159	-24.17	4302129	22	18936
dre-miR-30a-3p	c142692_g1_i1	1184	-152.84	152	-26	4330854	22	9105
dre-miR-30a-3p	c140860_g1_i4	1305	-154.25	151	-21.32	4314930	22	16160
dre-miR-30a-3p	c143992_g1_i5	1327	-168.93	159	-23.58	4330493	22	16784
dre-miR-30a-3p	c142264_g1_i1	1339	-175.29	162	-25.08	4314413	22	7215
dre-miR-30a-3p	c142264_g1_i2	1339	-175.29	162	-25.08	4328839	22	7395
dre-miR-30a-3p	c133560_g1_i2	1617	-199.4	156	-23.08	4314513	22	14202
dre-miR-30a-3p	c133560_g1_i3	1617	-199.4	156	-23.08	4328503	22	14693
dre-miR-30a-3p	c135608_g1_i1	1823	-222.39	174	-23.56	4330129	22	8447
dre-miR-30c-3p	c140635_g1_i2	1046	-165.33	172	-27.77	4425133	22	11985
dre-miR-30e-3p	c143992_g1_i7	1027	-127.36	156	-22.49	4539833	22	17464
dre-miR-30e-3p	c143992_g1_i5	1027	-126.22	156	-21.72	4545533	22	16784
dre-miR-30e-3p	c142611_g1_i1	1029	-118.13	158	-23.04	4516354	22	18600
dre-miR-30e-3p	c135608_g1_i1	1047	-129.42	161	-22.37	4545169	22	8447
dre-miR-30e-3p	c131776_g1_i5	1074	-129.73	167	-21.07	4545487	22	4915
dre-miR-30e-3p	c139176_g1_i3	1084	-118.88	166	-21.44	4531392	22	7230
dre-miR-30e-3p	c133560_g1_i2	1163	-143.93	154	-22.47	4529553	22	14202
dre-miR-30e-3p	c133560_g1_i3	1163	-143.93	154	-22.47	4543543	22	14693
dre-miR-338	c143403_g1_i3	1023	-138.26	156	-23.95	8628221	22	14226
dre-miR-338	c133560_g1_i2	1072	-132.29	161	-22.69	8615313	22	14202
dre-miR-338	c133560_g1_i3	1072	-132.29	161	-22.69	8629303	22	14693
dre-miR-338	c144263_g2_i7	1165	-138.69	153	-19.72	8613451	22	14807
dre-miR-338	c144165_g1_i4	1216	-137.43	169	-22.1	8632440	22	15499
dre-miR-338	c141035_g1_i5	1320	-176.79	153	-25.2	8610349	22	15889
dre-miR-338	c141035_g1_i3	1320	-176.79	153	-25.2	8625808	22	15931
dre-miR-338	c144165_g1_i7	1377	-159.49	169	-22.1	8606931	22	15611
dre-miR-338	c144165_g1_i8	1377	-159.49	169	-22.1	8611796	22	15638
dre-miR-34a	c142009_g1_i8	1004	-131.89	155	-23.09	232369	22	12031
dre-miR-34a	c141035_g1_i5	1019	-147.74	155	-24.78	223789	22	15889
dre-miR-34a	c141035_g1_i3	1019	-147.74	155	-24.78	239248	22	15931
dre-miR-34a	c138048_g1_i5	1022	-152.93	155	-29.32	217355	22	5850
dre-miR-34a	c141413_g1_i2	1024	-148.55	162	-31.84	219007	22	6476
dre-miR-34a	c141413_g1_i1	1024	-148.55	162	-31.84	232035	22	6575
dre-miR-34a	c141509_g1_i3	1034	-144.4	156	-22.9	225232	22	12436
dre-miR-34a	c141509_g1_i4	1034	-144.4	156	-22.9	229394	22	12358
dre-miR-34a	c141321_g1_i1	1047	-156.26	170	-27.52	215592	22	16276
dre-miR-34a	c142861_g1_i2	1054	-155.53	164	-26.37	231862	22	15416
dre-miR-34a	c139774_g2_i9	1155	-153.29	153	-21.87	227517	22	9815
dre-miR-34a	c139714_g1_i1	1159	-173.8	149	-26.19	249185	22	16004
dre-miR-34a	c121917_g1_i1	1177	-177	159	-27.69	233175	22	14866
dre-miR-34a	c142479_g3_i4	1204	-174.33	170	-26.49	242315	22	10362
dre-miR-34a	c140585_g1_i3	1316	-198.7	152	-26.29	230702	22	12911
dre-miR-34a	c142611_g1_i1	1455	-210.57	155	-26.08	215554	22	18600
dre-miR-34a	c142831_g3_i2	1592	-238.82	152	-26.05	229970	22	15890
dre-miR-34b	c142878_g2_i1	1007	-125.07	154	-25.26	9941499	23	11272
dre-miR-34b	c138570_g2_i3	1033	-134.56	152	-21.05	9929598	23	11243
dre-miR-34b	c138570_g2_i4	1033	-134.56	152	-21.05	9932450	23	10112
dre-miR-34b	c138570_g2_i1	1033	-134.56	152	-21.05	9936848	23	10121
dre-miR-34b	c138570_g2_i2	1033	-134.56	152	-21.05	9945244	23	10732
dre-miR-34b	c138570_g2_i5	1033	-134.56	152	-21.05	9959730	23	10238
dre-miR-34b	c136375_g2_i4	1034	-148.62	164	-26.36	9954115	23	7650
dre-miR-34b	c137694_g4_i2	1046	-144.66	164	-24.05	9928988	23	922
dre-miR-34b	c139457_g2_i7	1051	-144.64	160	-25.15	9931949	23	15103
dre-miR-34b	c139500_g1_i3	1056	-132.63	173	-22.45	9935321	23	8901
dre-miR-34b	c139500_g1_i1	1056	-132.63	173	-22.45	9945389	23	9061
dre-miR-34b	c121917_g1_i1	1056	-144.99	162	-27.65	9945815	23	14866
dre-miR-34b	c140635_g1_i2	1176	-165.45	169	-26.89	9944493	23	11985
dre-miR-34b	c142861_g1_i2	1315	-161.57	162	-21.91	9944502	23	15416
dre-miR-34b	c141035_g1_i5	1322	-194.19	160	-25.45	9936429	23	15889
dre-miR-34b	c141035_g1_i3	1322	-194.19	160	-25.45	9951888	23	15931
dre-miR-34b	c142611_g1_i1	1614	-198.01	156	-21.78	9928194	23	18600
dre-miR-34c-5p	c142009_g1_i5	1000	-119.13	150	-20.61	10628402	23	13098
dre-miR-34c-5p	c139714_g1_i1	1016	-137.54	151	-22.14	10642785	23	16004
dre-miR-34c-5p	c140143_g1_i3	1021	-133.96	149	-21.03	10609672	23	12715
dre-miR-34c-5p	c141413_g1_i2	1026	-125.34	151	-22.18	10612607	23	6476
dre-miR-34c-5p	c141413_g1_i1	1026	-125.34	151	-22.18	10625635	23	6575
dre-miR-34c-5p	c142238_g2_i1	1033	-147.21	152	-26.62	10636350	23	15561
dre-miR-34c-5p	c115810_g1_i2	1036	-133.77	163	-24.21	10613406	23	8947
dre-miR-34c-5p	c115810_g1_i3	1036	-133.77	163	-24.21	10625760	23	9257
dre-miR-34c-5p	c140735_g1_i1	1052	-127.7	161	-23.71	10627913	23	15171
dre-miR-34c-5p	c142611_g1_i1	1068	-131.97	175	-23.08	10609154	23	18600
dre-miR-34c-5p	c142831_g3_i2	1139	-139.61	145	-21.87	10623570	23	15890
dre-miR-34c-5p	c142009_g1_i8	1153	-138.58	153	-20.61	10625969	23	12031
dre-miR-34c-5p	c141321_g1_i1	1190	-145.34	163	-20.8	10609192	23	16276
dre-miR-34c-5p	c139774_g2_i9	1629	-209.42	157	-21.02	10621117	23	9815
dre-miR-363-5p	c140486_g1_i2	1016	-134.19	152	-22.04	8645783	23	4066
dre-miR-363-5p	c144263_g2_i7	1027	-140.93	157	-26.9	8649291	23	14807
dre-miR-363-5p	c144182_g2_i5	1032	-151.66	157	-27.74	8657503	23	8977
dre-miR-363-5p	c140969_g1_i3	1034	-132.56	155	-21.93	8638110	23	12599
dre-miR-363-5p	c136757_g11_i4	1043	-163.75	160	-32.5	8663503	23	10406
dre-miR-363-5p	c139714_g1_i1	1055	-130.99	173	-21.71	8671585	23	16004
dre-miR-363-5p	c138549_g1_i4	1084	-142.41	168	-27.78	8639693	23	10808
dre-miR-363-5p	c142611_g1_i1	1154	-152.98	150	-22.81	8637954	23	18600
dre-miR-363-5p	c134016_g1_i2	1168	-160.81	152	-24.8	8663207	23	8624
dre-miR-363-5p	c142238_g2_i1	1183	-153.25	155	-25.24	8665150	23	15561
dre-miR-363-5p	c132112_g2_i2	1204	-150.26	160	-23.97	8653938	23	5217
dre-miR-375	c138073_g2_i4	1663	-220.68	163	-24.21	8775836	22	6645
dre-miR-3906	c159366_g1_i1	1123	-116.71	172	-19.84	12214024	23	1382
dre-miR-430a-11-5p	c134876_g1_i2	1011	-130.98	149	-24.29	9003103	21	10150
dre-miR-430a-11-5p	c140585_g1_i3	1340	-179.68	164	-26.89	9011502	21	12911
dre-miR-430a-12-5p	c134876_g1_i2	1011	-130.98	149	-24.29	9038943	21	10150
dre-miR-430a-12-5p	c140585_g1_i3	1340	-179.68	164	-26.89	9047342	21	12911
dre-miR-430a-13-5p	c134876_g1_i2	1011	-130.98	149	-24.29	9074783	21	10150
dre-miR-430a-13-5p	c140585_g1_i3	1340	-179.68	164	-26.89	9083182	21	12911
dre-miR-430a-14-5p	c134876_g1_i2	1011	-130.98	149	-24.29	9110623	21	10150
dre-miR-430a-14-5p	c140585_g1_i3	1340	-179.68	164	-26.89	9119022	21	12911
dre-miR-430a-15-5p	c134876_g1_i2	1011	-130.98	149	-24.29	9146463	21	10150
dre-miR-430a-15-5p	c140585_g1_i3	1340	-179.68	164	-26.89	9154862	21	12911
dre-miR-430a-16-5p	c134876_g1_i2	1011	-130.98	149	-24.29	9182303	21	10150
dre-miR-430a-16-5p	c140585_g1_i3	1340	-179.68	164	-26.89	9190702	21	12911
dre-miR-430a-17-5p	c134876_g1_i2	1011	-130.98	149	-24.29	9218143	21	10150
dre-miR-430a-17-5p	c140585_g1_i3	1340	-179.68	164	-26.89	9226542	21	12911
dre-miR-430a-3p	c144165_g1_i3	1031	-120.07	155	-20.95	1387479	22	15603
dre-miR-430a-3p	c144165_g1_i10	1031	-120.07	155	-20.95	1391562	22	15785
dre-miR-430a-3p	c144165_g1_i9	1031	-120.07	155	-20.95	1395360	22	15758
dre-miR-430a-3p	c138946_g5_i2	1051	-114.88	163	-19.65	1373868	22	7180
dre-miR-430a-3p	c142147_g1_i7	1165	-124.79	151	-18.53	1363249	22	18936
dre-miR-430a-4-5p	c134876_g1_i2	1011	-130.98	149	-24.29	8967263	21	10150
dre-miR-430a-4-5p	c140585_g1_i3	1340	-179.68	164	-26.89	8975662	21	12911
dre-miR-430a-5p	c134876_g1_i2	1009	-140.01	148	-22.43	8931423	21	10150
dre-miR-430a-5p	c128882_g1_i3	1012	-140.95	155	-23.41	8927555	21	5273
dre-miR-430a-5p	c140585_g1_i3	1055	-149.1	164	-27.79	8939822	21	12911
dre-miR-430b-3p	c138946_g5_i2	1044	-121.87	159	-20.14	1445548	23	7180
dre-miR-430c-3p	c138946_g5_i2	1199	-144.59	166	-20.91	1517228	22	7180
dre-miR-430c-3p	c144003_g4_i3	1209	-146.57	173	-26.64	1520499	22	15167
dre-miR-430i-3p	c142147_g1_i7	1176	-135.33	156	-19.3	9283889	22	18936
dre-miR-430i-5p	c134876_g1_i2	1011	-130.98	149	-24.29	9253983	21	10150
dre-miR-430i-5p	c140585_g1_i3	1340	-179.68	164	-26.89	9262382	21	12911
dre-miR-455-3p	c142356_g2_i4	1024	-131.9	159	-23.39	8923969	23	7571
dre-miR-455-3p	c142459_g3_i2	1037	-147	159	-26.24	8896319	23	15674
dre-miR-455-3p	c140735_g1_i1	1053	-150.86	169	-28.44	8907593	23	15171
dre-miR-455-3p	c144103_g5_i3	1073	-132.58	167	-20.78	8902814	23	15607
dre-miR-455-3p	c142356_g2_i1	1176	-157.4	159	-25.5	8905722	23	6162
dre-miR-455-3p	c142356_g2_i5	1176	-157.4	159	-25.5	8908139	23	8770
dre-miR-455-3p	c142356_g2_i3	1176	-157.4	159	-25.5	8917824	23	10422
dre-miR-455-3p	c125928_g1_i1	1183	-135.14	159	-18.4	8901954	23	8877
dre-miR-455-3p	c142356_g2_i10	1319	-177.75	159	-25.5	8893832	23	8978
dre-miR-456	c141987_g8_i6	1027	-124.34	155	-21.16	9334044	22	6456
dre-miR-456	c141987_g8_i8	1027	-124.34	155	-21.16	9342648	22	5905
dre-miR-456	c140469_g12_i2	1029	-144.72	156	-24.55	9341453	22	4409
dre-miR-456	c141285_g1_i5	1033	-155.77	157	-26.44	9352313	22	4838
dre-miR-456	c140635_g1_i2	1051	-138.79	159	-22.67	9335213	22	11985
dre-miR-456	c142398_g3_i9	1059	-145.22	163	-28.4	9332895	22	9594
dre-miR-456	c142398_g3_i2	1059	-145.22	163	-28.4	9342051	22	9692
dre-miR-456	c135459_g2_i2	1166	-153.21	154	-24.38	9320051	22	7879
dre-miR-456	c135459_g2_i4	1166	-153.21	154	-24.38	9331455	22	7852
dre-miR-456	c135459_g2_i1	1166	-153.21	154	-24.38	9347995	22	7912
dre-miR-456	c138907_g1_i4	1169	-176.35	156	-25.27	9325318	22	12870
dre-miR-456	c138907_g1_i2	1169	-176.35	156	-25.27	9329599	22	12913
dre-miR-456	c138907_g1_i3	1169	-176.35	156	-25.27	9331409	22	12903
dre-miR-456	c138907_g1_i1	1169	-176.35	156	-25.27	9351384	22	12957
dre-miR-456	c143403_g1_i3	1170	-180.82	159	-30.88	9345021	22	14226
dre-miR-456	c140650_g1_i3	1180	-173.51	164	-26.62	9347521	22	10971
dre-miR-456	c142238_g2_i1	1199	-172.3	157	-26.26	9346110	22	15561
dre-miR-456	c142398_g3_i10	1224	-169.19	165	-28.4	9331597	22	10366
dre-miR-456	c142398_g3_i5	1224	-169.19	165	-28.4	9340003	22	10354
dre-miR-456	c142009_g1_i8	1316	-183.06	163	-24.07	9335729	22	12031
dre-miR-456	c142009_g1_i5	1316	-183.06	163	-24.07	9338162	22	13098
dre-miR-456	c141321_g1_i1	1337	-202.23	168	-26.74	9318952	22	16276
dre-miR-456	c141285_g1_i4	1341	-203.51	162	-27.19	9328828	22	5069
dre-miR-456	c143674_g1_i2	1607	-215.91	162	-28.21	9334166	22	19154
dre-miR-456	c142586_g3_i3	1613	-229.42	154	-28.71	9352483	22	11115
dre-miR-457a	c242840_g1_i1	1008	-115.33	150	-18.35	9368836	22	690
dre-miR-457a	c133774_g1_i3	1033	-114.14	156	-19.51	9354454	22	9611
dre-miR-457a	c142878_g2_i4	1037	-124.93	157	-21.83	9366029	22	10328
dre-miR-457a	c115810_g1_i2	1040	-114.46	157	-19.62	9359006	22	8947
dre-miR-457a	c115810_g1_i3	1040	-114.46	157	-19.62	9371360	22	9257
dre-miR-457a	c136014_g1_i1	1042	-117.69	158	-20.36	9376120	22	15541
dre-miR-457a	c138260_g3_i2	1043	-127.19	158	-26.41	9385128	22	5316
dre-miR-457a	c142433_g2_i6	1046	-124.61	159	-20.15	9388354	22	6172
dre-miR-457a	c131498_g1_i1	1052	-119.2	167	-22.14	9371128	22	12743
dre-miR-457a	c125931_g1_i1	1085	-126.81	166	-22.16	9359020	22	4243
dre-miR-457a	c141321_g1_i1	1154	-128.79	150	-18.39	9354792	22	16276
dre-miR-457a	c142878_g2_i1	1177	-144.45	157	-21.83	9368059	22	11272
dre-miR-457a	c142433_g2_i3	1191	-141.42	159	-20.15	9355135	22	6313
dre-miR-457a	c142861_g1_i2	1200	-129.83	162	-18.66	9371062	22	15416
dre-miR-457a	c99099_g1_i1	1205	-135.86	162	-19.04	9390001	22	8348
dre-miR-457a	c130465_g1_i6	1206	-128.97	162	-18.37	9363419	22	4368
dre-miR-457a	c142995_g1_i3	1209	-130.42	168	-19.52	9366604	22	10626
dre-miR-457a	c122394_g1_i1	1249	-139.59	163	-19.38	9377306	22	4638
dre-miR-457a	c143367_g1_i1	1315	-143.93	151	-18.08	9377260	22	14497
dre-miR-457a	c143367_g1_i2	1315	-143.93	151	-18.08	9382286	22	14263
dre-miR-457a	c144161_g1_i3	1321	-141.18	159	-18.17	9355193	22	14743
dre-miR-457a	c80528_g1_i1	1343	-146.77	155	-19.66	9386138	22	748
dre-miR-457a	c138260_g3_i7	1359	-167.74	159	-26.41	9389051	22	10216
dre-miR-457a	c142831_g3_i2	1622	-188.76	155	-19.66	9369170	22	15890
dre-miR-457a	c50919_g1_i1	1690	-191.96	159	-19.95	9389275	22	4475
dre-miR-457a	c141413_g1_i1	2060	-231.72	159	-20.31	9371235	22	6575
dre-miR-457a	c141413_g1_i2	2078	-231.77	160	-20.31	9358207	22	6476
dre-miR-457b-3p	c142459_g3_i2	1476	-196.33	156	-25.59	9433919	22	15674
dre-miR-457b-5p	c144161_g1_i3	1004	-111.59	147	-20.61	9391033	22	14743
dre-miR-457b-5p	c140855_g2_i19	1014	-127.02	156	-22.53	9405424	22	10210
dre-miR-457b-5p	c140855_g2_i1	1014	-127.02	156	-22.53	9419879	22	10156
dre-miR-457b-5p	c132152_g1_i1	1029	-122.63	153	-21.79	9404759	22	6362
dre-miR-457b-5p	c115810_g1_i2	1032	-120.35	157	-19.7	9394846	22	8947
dre-miR-457b-5p	c115810_g1_i3	1032	-120.35	157	-19.7	9407200	22	9257
dre-miR-457b-5p	c142878_g2_i1	1035	-111.42	159	-18.43	9403899	22	11272
dre-miR-457b-5p	c99099_g1_i1	1039	-110.49	155	-18.68	9425841	22	8348
dre-miR-457b-5p	c142433_g2_i6	1054	-128.01	161	-21.58	9424194	22	6172
dre-miR-457b-5p	c50919_g1_i1	1056	-106.87	159	-17.63	9425115	22	4475
dre-miR-457b-5p	c138260_g3_i7	1057	-131.61	167	-26.59	9424891	22	10216
dre-miR-457b-5p	c141321_g1_i1	1152	-131.63	148	-18.9	9390632	22	16276
dre-miR-457b-5p	c105358_g1_i2	1171	-127.32	155	-18.82	9411234	22	6022
dre-miR-457b-5p	c141393_g1_i5	1176	-125.94	155	-19.13	9390807	22	6005
dre-miR-457b-5p	c144103_g5_i3	1182	-132.54	160	-22.24	9404574	22	15607
dre-miR-457b-5p	c142433_g2_i3	1199	-142.88	161	-21.58	9390975	22	6313
dre-miR-457b-5p	c141413_g1_i2	1298	-154.04	150	-21.35	9394047	22	6476
dre-miR-457b-5p	c130465_g1_i6	1394	-152.85	166	-20.13	9399259	22	4368
dre-miR-457b-5p	c141413_g1_i1	1583	-184.79	150	-21.35	9407075	22	6575
dre-miR-457b-5p	c143367_g1_i1	1899	-204.86	154	-17.88	9413100	22	14497
dre-miR-457b-5p	c143367_g1_i2	1899	-204.86	154	-17.88	9418126	22	14263
dre-miR-461	c142253_g2_i1	1008	-125.19	150	-24.82	9682761	22	7283
dre-miR-499-3p	c133933_g1_i4	1095	-125.3	166	-19.39	10214733	22	5853
dre-miR-499-3p	c142611_g1_i1	1216	-129.18	165	-18.18	10214914	22	18600
dre-miR-7145	c144165_g1_i3	1076	-121.01	163	-20.44	12246999	22	15603
dre-miR-7145	c144165_g1_i10	1076	-121.01	163	-20.44	12251082	22	15785
dre-miR-7145	c144165_g1_i9	1076	-121.01	163	-20.44	12254880	22	15758
dre-miR-7146-3p	c137481_g4_i8	1038	-143.46	155	-24.16	12304460	22	5788
dre-miR-7146-3p	c137481_g4_i7	1038	-143.46	155	-24.16	12310790	22	5449
dre-miR-7149-3p	c134867_g1_i1	1206	-141.54	159	-19.38	12499996	23	11296
dre-miR-725-3p	c140860_g1_i4	1025	-117.19	150	-20.09	10407730	22	16160
dre-miR-725-3p	c142459_g3_i2	1034	-122.52	152	-21.03	10401599	22	15674
dre-miR-725-3p	c140084_g7_i3	1044	-120.34	155	-19.74	10394700	22	8585
dre-miR-725-3p	c140084_g7_i2	1044	-120.34	155	-19.74	10426564	22	8564
dre-miR-725-3p	c133560_g1_i3	1198	-137.64	159	-19.97	10421303	22	14693
dre-miR-725-3p	c133560_g1_i2	1360	-154.14	162	-19.97	10407313	22	14202
dre-miR-725-3p	c144161_g1_i3	1495	-179.17	160	-24.91	10394553	22	14743
dre-miR-727-3p	c141321_g1_i1	1058	-131.46	171	-25.64	10501672	22	16276
dre-miR-727-3p	c143674_g1_i2	1203	-156.42	170	-28.18	10516886	22	19154
dre-miR-727-5p	c140735_g1_i1	1022	-121.37	151	-20.65	10484553	22	15171
dre-miR-727-5p	c142147_g1_i7	1064	-158.56	159	-31.94	10466609	22	18936
dre-miR-727-5p	c140860_g1_i4	1200	-155.67	158	-28.05	10479410	22	16160
dre-miR-730	c140044_g3_i16	1011	-141.53	157	-29.2	10708850	23	13669
dre-miR-730	c96684_g1_i2	1014	-130.74	151	-24.46	10690006	23	2747
dre-miR-730	c132897_g1_i1	1016	-122.76	151	-21.6	10706880	23	8280
dre-miR-730	c143539_g10_i2	1033	-152.94	159	-28.65	10710873	23	8016
dre-miR-730	c141046_g1_i1	1046	-135.24	159	-25.39	10701018	23	6114
dre-miR-730	c141793_g1_i2	1165	-161.14	164	-25.61	10683590	23	9332
dre-miR-730	c142147_g1_i7	1181	-165.97	163	-24.02	10681649	23	18936
dre-miR-730	c142971_g3_i4	1184	-144.28	171	-24	10695592	23	15322
dre-miR-730	c140044_g3_i3	1203	-160.69	162	-23.01	10680771	23	13083
dre-miR-730	c140044_g3_i12	1203	-160.69	162	-23.01	10687893	23	12335
dre-miR-730	c140044_g3_i5	1203	-160.69	162	-23.01	10695938	23	13353
dre-miR-730	c141035_g1_i5	1335	-171.64	162	-27.06	10689069	23	15889
dre-miR-730	c141035_g1_i3	1335	-171.64	162	-27.06	10704528	23	15931
dre-miR-730	c121917_g1_i1	1794	-226.35	161	-24.07	10698455	23	14866
dre-miR-732	c133933_g1_i4	1006	-121.34	151	-21.24	10752333	22	5853
dre-miR-732	c133933_g1_i2	1006	-121.34	151	-21.24	10780505	22	2372
dre-miR-735-5p	c114279_g2_i2	1173	-181.73	153	-25.85	10911151	18	4979
dre-miR-735-5p	c114279_g2_i1	1173	-181.73	153	-25.85	10925304	18	4858
dre-miR-7a	c130488_g1_i7	1006	-126.49	148	-21.79	39759	23	4773
dre-miR-7a	c130488_g1_i2	1006	-126.49	148	-21.79	43709	23	5010
dre-miR-7a	c130488_g1_i3	1006	-126.49	148	-21.79	44467	23	5184
dre-miR-7a	c130488_g1_i9	1006	-126.49	148	-21.79	45250	23	4893
dre-miR-7a	c130488_g1_i5	1006	-126.49	148	-21.79	49547	23	5067
dre-miR-7a	c142611_g1_i1	1070	-127.32	162	-21.34	36354	23	18600
dre-miR-7a	c135615_g1_i2	1210	-157.19	165	-25.65	60659	23	11803
dre-miR-7a	c143367_g1_i1	1483	-169.57	156	-25.12	58860	23	14497
dre-miR-7a	c143367_g1_i2	1483	-169.57	156	-25.12	63886	23	14263
dre-miR-7b	c143367_g1_i1	1039	-124.45	155	-20.95	23020	21	14497
dre-miR-7b	c143367_g1_i2	1039	-124.45	155	-20.95	28046	21	14263
dre-miR-7b	c105570_g1_i1	1054	-116.49	171	-18.59	5415	21	3942
dre-miR-7b	c135615_g1_i2	1056	-120.73	158	-20.66	24819	21	11803
dre-miR-92a-2-5p	c137150_g1_i5	1010	-158.25	154	-25.39	4643625	23	5940
dre-miR-92a-2-5p	c143992_g1_i7	1027	-148.39	154	-26.72	4647353	23	17464
dre-miR-92a-2-5p	c143323_g1_i1	1198	-163.42	162	-26.13	4654064	23	3338
dre-miR-92a-2-5p	c105358_g1_i2	1656	-222.43	175	-25.88	4644514	23	6022
dre-miR-92a-5p	c140374_g1_i5	1021	-136.43	150	-23.15	4585155	23	12507
dre-miR-92a-5p	c131412_g1_i2	1036	-139.72	161	-25.55	4572957	23	5806
dre-miR-92a-5p	c141035_g1_i5	1160	-168.44	150	-26.44	4560429	23	15889
dre-miR-92a-5p	c141035_g1_i3	1160	-168.44	150	-26.44	4575888	23	15931
dre-miR-92a-5p	c137365_g1_i8	1191	-152.9	169	-24.53	4579170	23	5573
dre-miR-92a-5p	c143992_g1_i7	1203	-166.1	158	-24.74	4575673	23	17464
dre-miR-92a-5p	c136968_g5_i6	1204	-162.09	161	-24.33	4553928	23	9167
dre-miR-92a-5p	c136968_g5_i7	1204	-162.09	161	-24.33	4575835	23	9480
dre-miR-92a-5p	c143323_g1_i1	1356	-186.7	169	-26.94	4582384	23	3338
dre-miR-92a-5p	c140635_g1_i2	1457	-192.88	155	-24.6	4568493	23	11985
dre-miR-92a-5p	c105358_g1_i2	1824	-246.05	168	-30.54	4572834	23	6022
dre-miR-92b-5p	c129819_g1_i2	1012	-157.07	154	-27.17	4676733	24	9746
dre-miR-92b-5p	c138568_g2_i7	1013	-160.63	150	-26.42	4674745	24	15529
dre-miR-92b-5p	c138568_g2_i4	1013	-160.63	150	-26.42	4693527	24	15271
dre-miR-92b-5p	c141626_g1_i2	1016	-157.07	153	-26.39	4672015	24	13230
dre-miR-92b-5p	c139201_g1_i2	1018	-168.33	157	-30.2	4679803	24	10577
dre-miR-92b-5p	c141941_g2_i20	1019	-163.62	151	-29.79	4674372	24	4796
dre-miR-92b-5p	c138315_g2_i4	1020	-170.6	155	-28.66	4662448	24	9454
dre-miR-92b-5p	c119565_g1_i5	1020	-174.79	152	-32.19	4683295	24	6533
dre-miR-92b-5p	c143606_g1_i5	1024	-157.55	157	-29.09	4659310	24	6904
dre-miR-92b-5p	c120206_g1_i1	1024	-155.73	154	-27.33	4682616	24	6891
dre-miR-92b-5p	c109875_g1_i1	1026	-165.76	155	-32.26	4674183	24	4870
dre-miR-92b-5p	c128747_g1_i3	1029	-158.71	165	-27.73	4661555	24	4578
dre-miR-92b-5p	c141941_g2_i19	1029	-166.74	157	-29.79	4665961	24	4332
dre-miR-92b-5p	c141941_g2_i14	1029	-166.74	157	-29.79	4667766	24	4387
dre-miR-92b-5p	c141941_g2_i1	1029	-166.74	157	-29.79	4688390	24	4332
dre-miR-92b-5p	c142664_g1_i13	1029	-151.78	152	-26.08	4692331	24	5845
dre-miR-92b-5p	c131701_g1_i5	1039	-168.02	165	-28.45	4675925	24	5663
dre-miR-92b-5p	c134899_g2_i2	1041	-152.84	154	-27.19	4669272	24	8129
dre-miR-92b-5p	c134899_g2_i1	1041	-152.84	154	-27.19	4680344	24	8392
dre-miR-92b-5p	c134289_g1_i2	1042	-153.72	161	-25.51	4682617	24	4006
dre-miR-92b-5p	c142253_g2_i1	1043	-157.19	166	-27.28	4665161	24	7283
dre-miR-92b-5p	c133430_g2_i2	1043	-164.09	164	-28.42	4690710	24	4448
dre-miR-92b-5p	c138477_g5_i2	1043	-155.81	171	-30.25	4692769	24	5290
dre-miR-92b-5p	c138756_g1_i4	1044	-142.65	155	-25.01	4678513	24	7984
dre-miR-92b-5p	c142971_g3_i4	1046	-162.71	170	-29.83	4674472	24	15322
dre-miR-92b-5p	c136616_g1_i1	1047	-168.84	172	-29.26	4664675	24	8609
dre-miR-92b-5p	c137045_g1_i1	1066	-162.16	169	-26.99	4675571	24	13263
dre-miR-92b-5p	c137045_g1_i4	1066	-162.16	169	-26.99	4689719	24	13317
dre-miR-92b-5p	c140588_g1_i4	1077	-166.19	170	-30.92	4689952	24	8243
dre-miR-92b-5p	c133501_g2_i1	1078	-164.55	173	-26.89	4666064	24	8619
dre-miR-92b-5p	c129642_g1_i2	1156	-175.02	156	-26.56	4692465	24	7650
dre-miR-92b-5p	c141626_g1_i4	1163	-183.01	153	-26.39	4679689	24	13239
dre-miR-92b-5p	c141579_g2_i2	1166	-199.06	155	-28.79	4672539	24	10799
dre-miR-92b-5p	c132725_g2_i1	1167	-191.51	158	-28.28	4664877	24	3324
dre-miR-92b-5p	c141777_g2_i1	1168	-180.58	152	-29.55	4683237	24	12228
dre-miR-92b-5p	c141777_g2_i2	1168	-180.58	152	-29.55	4687135	24	10578
dre-miR-92b-5p	c119203_g1_i3	1169	-171.84	157	-25.6	4693922	24	8438
dre-miR-92b-5p	c143310_g1_i3	1175	-183.53	158	-32.05	4673505	24	10957
dre-miR-92b-5p	c142611_g1_i1	1179	-173.69	157	-25.58	4659714	24	18600
dre-miR-92b-5p	c141865_g1_i3	1180	-177.83	155	-26.96	4659936	24	8930
dre-miR-92b-5p	c140987_g1_i1	1182	-172.5	162	-24.25	4692486	24	15839
dre-miR-92b-5p	c135413_g3_i4	1186	-187.73	156	-26.34	4668718	24	3560
dre-miR-92b-5p	c135413_g3_i12	1186	-187.73	156	-26.34	4680737	24	3708
dre-miR-92b-5p	c138488_g3_i2	1191	-191.07	160	-31.75	4662294	24	6267
dre-miR-92b-5p	c141541_g3_i2	1191	-175.65	159	-29.87	4684079	24	5640
dre-miR-92b-5p	c141541_g3_i8	1191	-175.65	159	-29.87	4688117	24	5609
dre-miR-92b-5p	c121944_g1_i1	1192	-184.32	157	-29.58	4671555	24	4044
dre-miR-92b-5p	c136616_g1_i2	1193	-188.59	172	-29.26	4677784	24	8859
dre-miR-92b-5p	c134971_g1_i4	1193	-166.05	161	-26.45	4685398	24	7828
dre-miR-92b-5p	c137799_g1_i1	1193	-170.88	158	-25.28	4690426	24	10777
dre-miR-92b-5p	c127397_g1_i1	1314	-204.39	157	-31.64	4676351	24	8582
dre-miR-92b-5p	c134972_g2_i2	1315	-196.43	153	-29.43	4688144	24	5212
dre-miR-92b-5p	c139714_g1_i1	1320	-205.49	156	-29.21	4693345	24	16004
dre-miR-92b-5p	c139457_g2_i7	1322	-200.22	166	-29.72	4663469	24	15103
dre-miR-92b-5p	c140492_g1_i4	1322	-211.78	157	-31.05	4681606	24	5622
dre-miR-92b-5p	c140987_g1_i4	1324	-193.12	162	-24.25	4686009	24	16713
dre-miR-92b-5p	c135413_g3_i5	1327	-204.62	156	-26.34	4690469	24	9086
dre-miR-92b-5p	c139869_g1_i1	1338	-195.02	160	-27.29	4677080	24	8019
dre-miR-92b-5p	c139869_g1_i7	1338	-195.02	160	-27.29	4691579	24	7993
dre-miR-92b-5p	c125686_g2_i1	1343	-219.01	163	-31.92	4689592	24	2936
dre-miR-92b-5p	c121917_g1_i1	1357	-185.41	163	-22.63	4677335	24	14866
dre-miR-92b-5p	c140499_g6_i7	1359	-207.89	160	-26.46	4673923	24	5879
dre-miR-92b-5p	c141663_g1_i1	1364	-186.85	161	-24.73	4668486	24	6636
dre-miR-92b-5p	c142125_g3_i2	1432	-226.87	147	-27.22	4673209	24	6895
dre-miR-92b-5p	c137523_g1_i3	1452	-218.07	153	-26.69	4686339	24	11659
dre-miR-92b-5p	c128980_g2_i3	1507	-226.84	156	-25.9	4668758	24	7897
dre-miR-93	c141730_g1_i1	1051	-124.87	164	-23.69	4737569	22	7189
dre-miR-9-5p	c140987_g1_i4	1016	-126.72	152	-22.22	2069689	23	16713
dre-miR-9-5p	c140987_g1_i1	1016	-126.72	152	-22.22	2076166	23	15839
dre-miR-9-5p	c142611_g1_i1	1022	-122.63	156	-20.61	2043394	23	18600
dre-miR-9-5p	c142147_g1_i7	1033	-116.48	169	-19.94	2044209	23	18936
dre-miR-9-5p	c140969_g1_i3	1034	-119.17	159	-19.11	2043550	23	12599
dre-miR-9-5p	c142001_g5_i4	1039	-132.77	163	-25.47	2049435	23	6738
dre-miR-9-5p	c142001_g5_i10	1039	-132.77	163	-25.47	2074375	23	6787
dre-miR-9-5p	c138470_g2_i3	1826	-208.41	169	-20.77	2055517	23	10233
ccr-miR-183	c136014_g1_i1	1000	-139.36	147	-21.98	1957240	23	15541
ccr-miR-210	c131371_g1_i2	1002	-131.01	149	-20.21	2851170	20	613
ccr-miR-24	c140759_g1_i2	1003	-128.75	146	-22.64	3257595	22	10438
ccr-miR-17-3p	c143367_g1_i1	1003	-137.39	155	-26.04	1743340	23	14497
ccr-miR-17-3p	c143367_g1_i2	1003	-137.39	155	-26.04	1748366	23	14263
ccr-miR-34	c142009_g1_i8	1004	-131.89	155	-23.09	3708849	22	12031
ccr-miR-205	c141035_g1_i5	1004	-141.53	149	-28.45	2660909	22	15889
ccr-miR-205	c141035_g1_i3	1004	-141.53	149	-28.45	2676368	22	15931
ccr-miR-16a	c134948_g1_i1	1005	-115.57	148	-21.81	1606756	22	9142
ccr-miR-182-5p	c140987_g1_i4	1005	-122.46	147	-21.43	1890489	23	16713
ccr-miR-182-5p	c140987_g1_i1	1005	-122.46	147	-21.43	1896966	23	15839
ccr-miR-22b	c121650_g1_i2	1006	-133.41	152	-26.62	3130193	22	4828
ccr-miR-22b	c121650_g1_i1	1006	-133.41	152	-26.62	3152128	22	4963
ccr-miR-17-3p	c138591_g1_i2	1006	-132.35	146	-23.73	1722151	23	8154
ccr-miR-138	c139264_g1_i1	1007	-134.14	152	-23.4	1054894	21	14411
ccr-miR-16b	c138346_g2_i15	1007	-119.11	152	-19.42	1627532	22	9650
ccr-miR-16b	c138346_g2_i2	1007	-119.11	152	-19.42	1646735	22	9555
ccr-miR-22b	c127546_g2_i1	1008	-141.54	159	-23.81	3122363	22	8154
ccr-miR-730	c132897_g1_i1	1008	-121.08	151	-21.57	4614080	22	8280
ccr-miR-7132	c130137_g2_i1	1008	-118.94	152	-20.13	5139643	21	3916
ccr-miR-16b	c38504_g1_i1	1008	-119.5	148	-19.46	1614598	22	3671
ccr-miR-133a-3p	c141615_g3_i2	1009	-128.17	152	-22.57	965585	22	6386
ccr-miR-2192	c141321_g1_i1	1010	-118.95	147	-19.02	4982312	21	16276
ccr-miR-16c	c140231_g1_i5	1010	-110.6	159	-17.38	1652863	21	4800
ccr-miR-16c	c140231_g1_i1	1010	-110.6	159	-17.38	1668305	21	5692
ccr-miR-183	c140509_g2_i3	1011	-134.5	152	-21.83	1957409	23	9876
ccr-miR-205	c139027_g1_i1	1011	-149.54	147	-26.13	2652187	22	8126
ccr-miR-24	c140987_g1_i4	1012	-140.63	151	-26.96	3252409	22	16713
ccr-miR-24	c140987_g1_i1	1012	-140.63	151	-26.96	3258886	22	15839
ccr-miR-20a-3p	c124489_g1_i3	1012	-140.43	153	-22.47	2762079	23	3410
ccr-miR-20a-3p	c141626_g1_i2	1012	-123.56	155	-20.25	2772495	23	13230
ccr-miR-20a-3p	c141626_g1_i4	1012	-123.56	155	-20.25	2780169	23	13239
ccr-miR-214	c142586_g3_i3	1012	-137.91	153	-28.13	2901283	19	11115
ccr-miR-15a	c141035_g1_i5	1013	-122.5	149	-20.7	1406509	21	15889
ccr-miR-15a	c141035_g1_i3	1013	-122.5	149	-20.7	1421968	21	15931
ccr-miR-20a-3p	c140951_g1_i1	1013	-139.91	160	-25.32	2795151	23	8384
ccr-miR-214	c138811_g1_i5	1013	-129.1	151	-21.61	2895613	19	10293
ccr-miR-27a	c142832_g3_i5	1014	-135.89	150	-21.92	3363072	21	11159
ccr-miR-7a	c144020_g2_i7	1014	-121.95	150	-21.59	4664493	24	12947
ccr-miR-7a	c141283_g1_i13	1014	-126.12	153	-20.8	4672138	24	7517
ccr-miR-7a	c141283_g1_i7	1014	-126.12	153	-20.8	4691896	24	7131
ccr-miR-7a	c144020_g2_i4	1014	-121.95	150	-21.59	4693624	24	13049
ccr-miR-7132	c140017_g1_i5	1014	-135.06	153	-25.73	5141190	21	8708
ccr-miR-16a	c136850_g3_i3	1014	-113.25	147	-18.77	1580277	22	4919
ccr-miR-16b	c136850_g3_i3	1014	-116.72	147	-19	1616117	22	4919
ccr-miR-17-3p	c144412_g1_i1	1014	-139.22	148	-24.65	1751256	23	5684
ccr-miR-17-3p	c138329_g1_i4	1014	-136.52	150	-26.23	1752821	23	14524
ccr-miR-194	c144161_g1_i3	1014	-135.72	149	-22.43	2258873	22	14743
ccr-miR-7132	c140084_g7_i3	1015	-119.2	153	-20.74	5126220	21	8585
ccr-miR-7132	c140084_g7_i2	1015	-119.2	153	-20.74	5158084	21	8564
ccr-miR-15a	c133681_g1_i1	1015	-119.78	149	-22.95	1408977	21	5607
ccr-miR-15a	c133681_g1_i2	1015	-119.78	149	-22.95	1427632	21	5596
ccr-miR-17-3p	c137088_g1_i1	1015	-125.62	157	-21.3	1741273	23	4450
ccr-miR-17-3p	c137088_g1_i2	1015	-125.62	157	-21.3	1755220	23	4841
ccr-miR-214	c129308_g1_i1	1015	-130.76	151	-22.9	2888193	19	6641
ccr-miR-214	c142479_g3_i4	1015	-140.27	153	-21.64	2894475	19	10362
ccr-miR-25	c142459_g3_i2	1016	-150.2	151	-24.93	3269439	22	15674
ccr-miR-27a	c115679_g1_i1	1016	-119.27	158	-20.33	3340014	21	5963
ccr-let-7i	c141035_g1_i5	1018	-146.84	152	-28.21	116269	21	15889
ccr-let-7i	c141035_g1_i3	1018	-146.84	152	-28.21	131728	21	15931
ccr-miR-24	c140069_g1_i1	1019	-141.03	155	-23.42	3259706	22	9643
ccr-miR-34	c141035_g1_i5	1019	-147.74	155	-24.78	3700269	22	15889
ccr-miR-34	c141035_g1_i3	1019	-147.74	155	-24.78	3715728	22	15931
ccr-miR-489	c142234_g4_i6	1019	-134.19	157	-21.59	4270784	22	7707
ccr-miR-7a	c130488_g1_i7	1019	-127.18	152	-21.79	4663119	24	4773
ccr-miR-7a	c130488_g1_i2	1019	-127.18	152	-21.79	4667069	24	5010
ccr-miR-7a	c130488_g1_i3	1019	-127.18	152	-21.79	4667827	24	5184
ccr-miR-7a	c130488_g1_i9	1019	-127.18	152	-21.79	4668610	24	4893
ccr-miR-7a	c130488_g1_i5	1019	-127.18	152	-21.79	4672907	24	5067
ccr-miR-2192	c143674_g1_i2	1019	-130.57	154	-24.2	4997526	21	19154
ccr-miR-103	c143992_g1_i5	1019	-139.57	152	-25.35	352253	23	16784
ccr-miR-15b	c143596_g3_i7	1019	-118.15	153	-20.56	1563844	21	5286
ccr-miR-17-3p	c137957_g2_i1	1019	-142.92	159	-25.64	1722611	23	10288
ccr-miR-9-3p	c142147_g1_i7	1020	-116.48	164	-19.94	4732209	22	18936
ccr-miR-16b	c136014_g1_i1	1020	-119.05	156	-22.86	1634680	22	15541
ccr-miR-203b-5p	c136699_g1_i8	1020	-119.68	153	-20.3	2586834	23	9257
ccr-miR-218a	c140635_g1_i2	1021	-115.89	152	-20.25	2955693	22	11985
ccr-miR-138	c144103_g5_i3	1021	-127.19	153	-21.25	1053854	21	15607
ccr-miR-138	c133430_g2_i2	1021	-130.2	157	-22.11	1070870	21	4448
ccr-miR-15b	c143403_g1_i3	1021	-124.73	153	-24.06	1567741	21	14226
ccr-miR-20a-3p	c144103_g5_i3	1021	-128.89	151	-24.06	2774174	23	15607
ccr-miR-20a-3p	c144724_g1_i1	1021	-128.29	156	-19.95	2780253	23	10291
ccr-miR-34	c138048_g1_i5	1022	-152.93	155	-29.32	3693835	22	5850
ccr-miR-489	c134122_g2_i3	1022	-118.49	156	-21.71	4266410	22	4184
ccr-miR-727-5p	c140735_g1_i1	1022	-121.37	151	-20.65	4499273	22	15171
ccr-miR-132a	c140374_g1_i5	1022	-139.1	158	-23.09	893635	22	12507
ccr-miR-16b	c144161_g1_i3	1022	-116.54	154	-19.38	1613753	22	14743
ccr-miR-16b	c126007_g1_i2	1022	-124.57	157	-20.46	1639045	22	5792
ccr-miR-16c	c139714_g1_i1	1022	-128.17	168	-22.07	1682785	21	16004
ccr-miR-214	c142219_g2_i5	1022	-137.55	152	-26.53	2895356	19	8992
ccr-miR-214	c142219_g2_i6	1022	-137.55	152	-26.53	2899625	19	9085
ccr-miR-338	c143403_g1_i3	1023	-138.26	156	-23.95	3682301	22	14226
ccr-miR-7b	c142194_g2_i3	1023	-115.4	161	-18.36	4702580	23	8694
ccr-miR-7132	c144660_g1_i3	1023	-125.14	154	-19.52	5141730	21	7417
ccr-miR-138	c139251_g1_i7	1023	-143.16	156	-23.69	1070560	21	4823
ccr-miR-205	c132831_g1_i3	1023	-145.61	163	-27.46	2654569	22	4641
ccr-miR-205	c132831_g1_i1	1023	-145.61	163	-27.46	2656709	22	4509
ccr-miR-205	c132831_g1_i2	1023	-145.61	163	-27.46	2663044	22	4653
ccr-miR-20a-3p	c144566_g1_i6	1023	-138.72	151	-27.4	2776678	23	8261
ccr-miR-20a-3p	c144566_g1_i1	1023	-138.72	151	-27.4	2794516	23	7837
ccr-miR-34	c141413_g1_i2	1024	-148.55	162	-31.84	3695487	22	6476
ccr-miR-34	c141413_g1_i1	1024	-148.55	162	-31.84	3708515	22	6575
ccr-miR-7132	c140176_g7_i11	1024	-132.06	158	-21.58	5129525	21	6260
ccr-miR-7132	c140176_g7_i1	1024	-132.06	158	-21.58	5148875	21	5857
ccr-miR-7132	c140176_g7_i2	1024	-132.06	158	-21.58	5153480	21	5791
ccr-miR-15a	c133361_g2_i4	1024	-120.62	157	-21.24	1413682	21	3763
ccr-miR-15a	c137143_g1_i3	1024	-120.9	154	-23.42	1433306	21	3402
ccr-miR-16c	c142433_g2_i6	1024	-118.78	153	-20.09	1682754	21	6172
ccr-miR-21	c138907_g1_i4	1024	-132.04	158	-21.98	2802438	23	12870
ccr-miR-21	c138907_g1_i2	1024	-132.04	158	-21.98	2806719	23	12913
ccr-miR-21	c138907_g1_i3	1024	-132.04	158	-21.98	2808529	23	12903
ccr-miR-21	c138907_g1_i1	1024	-132.04	158	-21.98	2828504	23	12957
ccr-miR-725	c140860_g1_i4	1025	-117.19	150	-20.09	4422450	22	16160
ccr-miR-7132	c126471_g3_i1	1025	-138.22	158	-24.05	5147022	21	7351
ccr-miR-138	c140201_g2_i4	1025	-151.8	155	-25.79	1048111	21	8560
ccr-miR-138	c140201_g2_i7	1025	-151.8	155	-25.79	1052541	21	8778
ccr-miR-138	c140201_g2_i10	1025	-151.8	155	-25.79	1059409	21	8581
ccr-miR-16c	c138260_g3_i7	1025	-111.07	154	-19.22	1683451	21	10216
ccr-miR-17-3p	c140626_g2_i2	1025	-155.32	157	-25.79	1720723	23	9032
ccr-miR-20a-3p	c141000_g1_i4	1025	-136.96	157	-22.23	2787118	23	5584
ccr-miR-24	c142479_g3_i4	1026	-148.87	155	-26.45	3252875	22	10362
ccr-miR-489	c138399_g4_i11	1026	-127.17	155	-23.48	4267587	22	3882
ccr-miR-125c	c138907_g1_i4	1026	-158.14	155	-27.17	580358	22	12870
ccr-miR-125c	c138907_g1_i2	1026	-158.14	155	-27.17	584639	22	12913
ccr-miR-125c	c138907_g1_i3	1026	-158.14	155	-27.17	586449	22	12903
ccr-miR-125c	c138907_g1_i1	1026	-158.14	155	-27.17	606424	22	12957
ccr-miR-15a	c80528_g1_i1	1026	-118.91	154	-20.38	1429658	21	748
ccr-miR-16a	c141833_g15_i1	1026	-125.07	152	-21.61	1585129	22	11089
ccr-miR-16a	c135971_g1_i4	1026	-120.4	154	-19.25	1607337	22	5855
ccr-miR-16b	c140855_g2_i19	1026	-131.35	156	-23.65	1628144	22	10210
ccr-miR-16b	c115810_g1_i3	1026	-120.07	151	-20.44	1629920	22	9257
ccr-miR-16b	c140855_g2_i1	1026	-131.35	156	-23.65	1642599	22	10156
ccr-miR-16c	c141393_g1_i5	1026	-113.06	152	-19.94	1649367	21	6005
ccr-miR-17-3p	c138689_g1_i1	1026	-139.17	168	-26.28	1736724	23	5934
ccr-miR-214	c142861_g1_i2	1026	-133.12	155	-24.47	2884022	19	15416
ccr-miR-27c-3p	c142611_g1_i1	1027	-126.6	158	-21.77	3405314	22	18600
ccr-miR-107	c141035_g1_i5	1027	-123.79	156	-21.94	367149	22	15889
ccr-miR-107	c141035_g1_i3	1027	-123.79	156	-21.94	382608	22	15931
ccr-miR-214	c135191_g1_i4	1027	-118.79	155	-19.18	2868502	19	11650
ccr-miR-214	c135191_g1_i1	1027	-118.79	155	-19.18	2871562	19	11665
ccr-miR-214	c140069_g1_i1	1027	-116.99	152	-19.48	2901306	19	9643
ccr-miR-7132	c142586_g4_i1	1028	-125.37	157	-23	5146479	21	12109
ccr-miR-15a	c38504_g1_i1	1028	-115.56	156	-18.71	1399558	21	3671
ccr-miR-16a	c134351_g1_i2	1028	-119.44	160	-20.74	1594489	22	4184
ccr-miR-16b	c134351_g1_i2	1028	-125.59	160	-24.36	1630329	22	4184
ccr-miR-16c	c141833_g15_i1	1028	-125.39	159	-21.49	1656809	21	11089
ccr-miR-214	c143674_g1_i2	1028	-130.72	159	-25.02	2882966	19	19154
ccr-miR-214	c126007_g1_i2	1028	-123.19	158	-21.97	2893445	19	5792
ccr-miR-22b	c136509_g1_i1	1029	-148.95	151	-24.96	3136973	22	8202
ccr-miR-22b	c136509_g1_i3	1029	-148.95	151	-24.96	3147214	22	7993
ccr-miR-132b	c138334_g1_i1	1029	-136.03	159	-22.91	5054904	22	8350
ccr-miR-132b	c138334_g1_i5	1029	-136.03	159	-22.91	5057515	22	8563
ccr-miR-132b	c138334_g1_i3	1029	-136.03	159	-22.91	5076298	22	8548
ccr-miR-103	c141035_g1_i5	1029	-123.96	156	-21.62	331309	23	15889
ccr-miR-103	c141035_g1_i3	1029	-123.96	156	-21.62	346768	23	15931
ccr-miR-107	c48353_g1_i1	1029	-119.15	157	-20.44	385456	22	2727
ccr-miR-146a	c135459_g2_i2	1029	-124.45	158	-19.83	1327731	23	7879
[truncated: 6,773 more rows]

## Sheet: IGA(PIT) vs. PSR(PIT)
Supplementary file 6: MiRNA targets identified from BPGL differential expressed genes
miRBase ID	Unigene ID	Tot Score	Tot Energy	Max Score	Max Energy	Strand	Len1	Len2
dre-miR-183-5p	c136014_g1_i1	1000	-139.36	147	-21.98	244331	23	15541
dre-miR-92a-5p	c131067_g1_i1	1000	-143.26	150	-24.12	2771579	23	7046
dre-miR-17a-3p	c104299_g1_i1	1001	-125.97	148	-23.59	1641634	22	2812
dre-miR-214	c116466_g1_i1	1002	-129.7	148	-23.04	640085	21	6497
dre-miR-19d-5p	c142736_g1_i3	1002	-141.13	150	-23.27	1951250	24	7627
dre-miR-214	c138223_g1_i4	1003	-114.24	154	-17.39	643992	21	7066
dre-miR-17a-2-3p	c142083_g1_i6	1003	-138.36	148	-23.65	1658727	23	3584
dre-miR-34a	c142009_g1_i3	1004	-131.89	155	-23.09	142355	22	11856
dre-miR-205-5p	c141035_g1_i2	1004	-141.53	149	-28.45	505155	22	15922
dre-miR-16a	c142865_g2_i3	1004	-130.8	149	-21.56	1529529	22	5644
dre-miR-16a	c142865_g2_i4	1004	-130.8	149	-21.56	1543327	22	5557
dre-miR-16b	c142865_g2_i3	1004	-121.38	149	-21.56	1551296	22	5644
dre-miR-204-3p	c141035_g1_i2	1005	-149.05	150	-28.61	483388	22	15922
dre-miR-16a	c139750_g1_i2	1005	-109.76	150	-19.55	1523732	22	9000
dre-miR-16a	c139750_g1_i1	1005	-109.76	150	-19.55	1530454	22	9018
dre-miR-16a	c139750_g1_i4	1005	-109.76	150	-19.55	1533020	22	8985
dre-miR-17a-2-3p	c115810_g1_i3	1005	-155.59	150	-29.4	1674940	23	9257
dre-miR-7a	c130488_g1_i4	1006	-126.49	148	-21.79	21858	23	4947
dre-miR-7a	c130488_g1_i7	1006	-126.49	148	-21.79	26634	23	4773
dre-miR-7a	c130488_g1_i9	1006	-126.49	148	-21.79	33199	23	4893
dre-miR-7a	c130488_g1_i5	1006	-126.49	148	-21.79	38456	23	5067
dre-miR-214	c138875_g3_i7	1006	-138.59	153	-24.53	641793	21	6190
dre-miR-214	c138875_g3_i3	1006	-138.59	153	-24.53	644202	21	4900
dre-miR-17a-3p	c138591_g1_i2	1006	-129.26	146	-21.18	1634724	22	8154
dre-miR-17a-3p	c138329_g1_i4	1006	-130.42	150	-23.92	1650203	22	14524
dre-miR-17a-2-3p	c138591_g1_i2	1006	-132.83	151	-24.36	1656491	23	8154
dre-miR-19d-5p	c140167_g1_i3	1006	-148.92	151	-27.56	1944896	24	12892
dre-miR-15a-5p	c125931_g1_i1	1007	-113.03	148	-19.44	1442528	22	4243
dre-miR-16b	c138346_g2_i13	1007	-119.11	152	-19.42	1553738	22	9396
dre-miR-16b	c138346_g2_i2	1007	-119.11	152	-19.42	1564876	22	9555
dre-miR-15a-5p	c142786_g1_i3	1008	-136.7	148	-22.9	1444302	22	10709
dre-miR-15a-5p	c142786_g1_i4	1008	-136.7	148	-22.9	1449017	22	10722
dre-miR-204-3p	c142586_g4_i1	1009	-147.53	150	-26.93	483098	22	12109
dre-miR-214	c133560_g1_i3	1009	-122.5	153	-21.18	643149	21	14693
dre-miR-15a-5p	c123068_g1_i2	1009	-114.55	146	-18.92	1446995	22	6221
dre-miR-15a-5p	c123068_g1_i1	1009	-114.55	146	-18.92	1448975	22	8353
dre-miR-92b-5p	c141379_g1_i6	1009	-161.57	148	-26.61	2830904	24	4030
dre-miR-122	c143338_g2_i3	1009	-131.92	151	-24.16	3137482	22	14437
dre-miR-17a-2-3p	c134770_g1_i2	1010	-127.56	154	-22.35	1656700	23	3689
dre-miR-22b-5p	c136046_g1_i3	1010	-133.38	155	-22.97	2110867	22	4611
dre-miR-9-5p	c142222_g5_i5	1011	-113.98	149	-19.42	1249953	23	10545
dre-miR-9-5p	c142222_g5_i6	1011	-113.98	149	-19.42	1252263	23	10579
dre-miR-15a-5p	c140361_g1_i1	1012	-124.24	157	-20.63	1442845	22	8064
dre-miR-15a-5p	c140361_g1_i3	1012	-124.24	157	-20.63	1455551	22	7847
dre-miR-24	c140987_g1_i6	1012	-140.63	151	-26.96	2238601	22	15902
dre-miR-24	c140987_g1_i1	1012	-140.63	151	-26.96	2238857	22	15839
dre-miR-92b-5p	c129819_g1_i2	1012	-157.07	154	-27.17	2850873	24	9746
dre-miR-214	c142017_g1_i2	1013	-141.19	154	-22.63	639072	21	3152
dre-miR-92b-5p	c138568_g2_i4	1013	-160.63	150	-26.42	2849609	24	15271
dre-miR-107a-5p	c141767_g1_i2	1013	-118.98	154	-22.36	3108194	23	5002
dre-miR-107a-5p	c140549_g1_i4	1013	-121.55	156	-21.45	3112257	23	13276
dre-miR-122	c133547_g3_i2	1013	-126.68	159	-21.77	3136690	22	8226
dre-miR-214	c140461_g5_i2	1014	-128.6	150	-25.65	645294	21	7926
dre-miR-214	c140461_g5_i1	1014	-128.6	150	-25.65	646631	21	7451
dre-miR-16a	c136850_g3_i3	1014	-113.25	147	-18.77	1527755	22	4919
dre-miR-16b	c136850_g3_i3	1014	-116.72	147	-19	1549522	22	4919
dre-miR-16c-5p	c107740_g1_i1	1015	-117.53	153	-20.15	1569825	22	5569
dre-miR-129-5p	c140468_g1_i2	1015	-129.97	154	-23.21	3489345	22	5914
dre-miR-205-3p	c143338_g2_i3	1016	-120.77	154	-19.46	525442	22	14437
dre-miR-222a-5p	c133560_g1_i3	1016	-132.73	151	-26.61	773751	23	14693
dre-miR-9-5p	c140987_g1_i6	1016	-126.72	152	-22.22	1259086	23	15902
dre-miR-9-5p	c140987_g1_i1	1016	-126.72	152	-22.22	1259342	23	15839
dre-miR-18b-5p	c139692_g3_i2	1016	-116.01	152	-19.73	1757104	22	7721
dre-miR-92b-5p	c141626_g1_i5	1016	-157.07	153	-26.39	2839072	24	11651
dre-miR-92b-5p	c141626_g1_i2	1016	-157.07	153	-26.39	2845343	24	13230
dre-miR-204-3p	c139623_g2_i2	1018	-157.71	155	-29.65	481261	22	6108
dre-miR-205-3p	c137825_g4_i2	1018	-116.2	156	-21.52	523538	22	5882
dre-miR-214	c136575_g1_i2	1018	-135.61	156	-29.64	636464	21	8496
dre-miR-214	c136575_g1_i4	1018	-135.61	156	-29.64	643098	21	8515
dre-miR-214	c142831_g3_i1	1018	-135.65	153	-23.83	650360	21	15923
dre-miR-17a-3p	c142736_g1_i1	1018	-134.31	155	-25.63	1638348	22	6125
dre-miR-92b-5p	c139201_g1_i4	1018	-168.33	157	-30.2	2842107	24	10859
dre-miR-92b-5p	c139201_g1_i3	1018	-168.33	157	-30.2	2850064	24	9871
dre-miR-107a-5p	c135287_g1_i1	1018	-116.41	151	-25.02	3107965	23	5268
dre-miR-34a	c141035_g1_i2	1019	-147.74	155	-24.78	135116	22	15922
dre-miR-183-5p	c142378_g1_i6	1019	-121.23	157	-21.13	241584	23	14580
dre-miR-183-5p	c142378_g1_i7	1019	-121.23	157	-21.13	249085	23	14511
dre-miR-183-5p	c142378_g1_i3	1019	-121.23	157	-21.13	250631	23	14655
dre-miR-22a-5p	c138329_g1_i4	1019	-117.05	155	-20.82	2063776	22	14524
dre-miR-22b-5p	c138329_g1_i4	1019	-122.02	159	-22.57	2107310	22	14524
dre-miR-24	c140069_g1_i3	1019	-141.03	155	-23.42	2221059	22	9655
dre-miR-222a-5p	c136200_g2_i1	1020	-133.9	152	-21.86	779293	23	7521
dre-let-7d-5p	c141035_g1_i2	1020	-130.27	158	-21.84	1071097	22	15922
dre-miR-16b	c136014_g1_i1	1020	-119.05	156	-22.86	1550351	22	15541
dre-miR-17a-3p	c139617_g4_i3	1020	-134.2	152	-23.58	1636795	22	6436
dre-miR-17a-2-3p	c136964_g1_i1	1020	-133.74	154	-25.93	1658542	23	6228
dre-miR-30e-3p	c131225_g1_i3	1020	-128.64	154	-24.92	2748521	22	6681
dre-miR-30e-3p	c131225_g1_i2	1020	-128.64	154	-24.92	2753502	22	7768
dre-miR-30e-3p	c131225_g1_i1	1020	-128.64	154	-24.92	2758167	22	6558
dre-miR-92a-2-5p	c139623_g2_i4	1020	-155.5	155	-25.77	2813584	23	6221
dre-miR-122	c140090_g7_i5	1020	-129.53	151	-20.42	3144168	22	8134
dre-miR-205-5p	c143416_g1_i1	1021	-151.42	158	-26.66	504573	22	9981
dre-miR-222a-5p	c144182_g2_i5	1021	-150.17	161	-25.82	764408	23	8977
dre-miR-92a-5p	c140374_g1_i2	1021	-136.43	150	-23.15	2778150	23	11503
dre-miR-92a-5p	c140374_g1_i5	1021	-136.43	150	-23.15	2783272	23	12507
dre-miR-15a-5p	c131498_g1_i2	1022	-129.67	155	-20.26	1449153	22	12635
dre-miR-15a-5p	c131498_g1_i1	1022	-129.67	155	-20.26	1457017	22	12743
dre-miR-15b-5p	c131498_g1_i2	1022	-124.53	157	-20.31	1492687	22	12635
dre-miR-15b-5p	c131498_g1_i1	1022	-124.53	157	-20.31	1500551	22	12743
dre-miR-16a	c137481_g4_i4	1022	-126.64	150	-21.99	1540296	22	5621
dre-miR-16b	c137481_g4_i4	1022	-129.62	150	-22.22	1562063	22	5621
dre-miR-16b	c144161_g1_i7	1022	-116.54	154	-19.38	1566366	22	14716
dre-miR-16c-5p	c120137_g1_i1	1022	-117.12	153	-19.5	1575248	22	4101
dre-miR-17a-3p	c138689_g1_i1	1022	-134.67	164	-24.55	1652334	22	5934
dre-miR-24	c133547_g3_i2	1022	-142.73	158	-24.52	2222476	22	8226
dre-miR-27e	c137523_g1_i1	1022	-126.18	152	-21.39	2526696	22	12114
dre-miR-27e	c137523_g1_i8	1022	-126.18	152	-21.39	2531267	22	12034
dre-miR-92b-5p	c138479_g1_i1	1022	-151.72	157	-27.63	2839858	24	4270
dre-miR-132-3p	c140374_g1_i2	1022	-139.1	158	-23.09	3670597	22	11503
dre-miR-132-3p	c140374_g1_i5	1022	-139.1	158	-23.09	3675719	22	12507
dre-miR-205-5p	c132831_g1_i1	1023	-145.61	163	-27.46	506265	22	4509
dre-miR-205-5p	c132831_g1_i2	1023	-145.61	163	-27.46	513881	22	4653
dre-miR-15b-5p	c132152_g1_i1	1023	-119.72	155	-20.82	1497935	22	6362
dre-miR-129-5p	c133328_g1_i2	1023	-137.72	154	-23.88	3499655	22	4742
dre-miR-34a	c141413_g1_i3	1024	-148.55	162	-31.84	136809	22	7361
dre-miR-34a	c141413_g1_i1	1024	-148.55	162	-31.84	151121	22	6575
dre-miR-214	c140160_g1_i4	1024	-143.84	163	-30.77	631789	21	5433
dre-miR-214	c142586_g4_i1	1024	-150.42	159	-24.1	635467	21	12109
dre-miR-16b	c132848_g1_i3	1024	-120.85	150	-23.37	1557654	22	6400
dre-miR-92b-5p	c120206_g1_i1	1024	-155.73	154	-27.33	2836461	24	6891
dre-miR-92b-5p	c143606_g1_i3	1024	-157.55	157	-29.09	2844125	24	6922
dre-miR-9-5p	c144143_g2_i2	1025	-117.7	154	-19.3	1242744	23	8745
dre-miR-17a-2-3p	c105929_g1_i2	1025	-128.96	152	-28.26	1663100	23	10380
dre-miR-20a-3p	c142875_g1_i2	1025	-129.01	158	-23.67	2011368	22	11568
dre-miR-22a-5p	c138377_g1_i2	1025	-124.89	163	-22.16	2050439	22	5469
dre-miR-22a-5p	c138377_g1_i3	1025	-124.89	163	-22.16	2054075	22	5655
dre-miR-22a-5p	c138377_g1_i4	1025	-124.89	163	-22.16	2060165	22	5782
dre-miR-22a-5p	c138377_g1_i1	1025	-124.89	163	-22.16	2066117	22	5640
dre-miR-92a-5p	c130842_g2_i5	1025	-146.07	164	-25.31	2780027	23	8994
dre-miR-92b-5p	c107740_g1_i1	1025	-147.52	152	-24.88	2832311	24	5569
dre-miR-15a-5p	c142865_g2_i3	1026	-129.03	156	-20.31	1442461	22	5644
dre-miR-16b	c115810_g1_i3	1026	-120.07	151	-20.44	1566105	22	9257
dre-miR-22b-5p	c131125_g2_i2	1026	-113.07	152	-20.21	2103573	22	3019
dre-miR-24	c142479_g3_i2	1026	-148.87	155	-26.45	2229401	22	9803
dre-miR-27a-3p	c132034_g1_i1	1026	-143.81	157	-25.92	2394813	22	5919
dre-miR-16a	c107740_g1_i1	1027	-132.64	153	-25.57	1526291	22	5569
dre-miR-16b	c107740_g1_i1	1027	-126.41	153	-24.78	1548058	22	5569
dre-miR-17a-3p	c140291_g1_i2	1027	-126.83	157	-21.57	1644300	22	5147
dre-miR-17a-3p	c142831_g3_i1	1027	-124.89	154	-23.88	1651642	22	15923
dre-miR-22b-5p	c142222_g5_i5	1027	-135.52	171	-24.07	2098866	22	10545
dre-miR-22b-5p	c142222_g5_i6	1027	-135.52	171	-24.07	2101176	22	10579
dre-miR-30e-3p	c143992_g1_i8	1027	-127.36	156	-22.49	2743807	22	17315
dre-miR-30e-3p	c143992_g1_i7	1027	-127.36	156	-22.49	2750083	22	17464
dre-miR-30e-3p	c143992_g1_i10	1027	-127.36	156	-22.49	2750759	22	17180
dre-miR-30e-3p	c143992_g1_i2	1027	-127.36	156	-22.49	2753242	22	17168
dre-miR-92a-2-5p	c143992_g1_i8	1027	-148.39	154	-26.72	2809108	23	17315
dre-miR-92a-2-5p	c143992_g1_i7	1027	-148.39	154	-26.72	2815384	23	17464
dre-miR-92a-2-5p	c143992_g1_i10	1027	-148.39	154	-26.72	2816060	23	17180
dre-miR-92a-2-5p	c143992_g1_i2	1027	-148.39	154	-26.72	2818543	23	17168
dre-miR-125b-2-3p	c126555_g3_i3	1027	-163.45	166	-26.66	3319042	21	8632
dre-miR-125b-2-3p	c126555_g3_i1	1027	-163.45	166	-26.66	3325501	21	9877
dre-miR-17a-2-3p	c141666_g1_i2	1028	-153.5	154	-26.21	1675369	23	6328
dre-miR-20a-3p	c139617_g4_i3	1028	-122.94	151	-21.26	2006834	22	6436
dre-miR-20a-3p	c142808_g2_i8	1028	-128.13	153	-23.44	2007305	22	13201
dre-miR-25-5p	c142036_g5_i9	1028	-172.17	156	-28.99	2243568	23	7667
dre-miR-25-5p	c142036_g5_i6	1028	-172.17	156	-28.99	2258241	23	7220
dre-miR-124-6-5p	c143992_g1_i8	1028	-144.84	156	-25.45	3222681	22	17315
dre-miR-124-6-5p	c143992_g1_i10	1028	-144.84	156	-25.45	3229633	22	17180
dre-miR-124-6-5p	c143992_g1_i2	1028	-144.84	156	-25.45	3232116	22	17168
dre-miR-199-5p	c144161_g1_i7	1029	-146.71	160	-32.81	369181	23	14716
dre-miR-15a-5p	c138583_g1_i2	1029	-133.84	153	-25.84	1438552	22	6294
dre-miR-15a-5p	c130270_g1_i2	1029	-127.68	158	-19.78	1451656	22	4309
dre-miR-15b-5p	c143596_g3_i11	1029	-119.17	155	-21.26	1493514	22	6156
dre-miR-19d-5p	c136824_g1_i10	1029	-154.78	156	-27.39	1948725	24	3229
dre-miR-92b-5p	c128747_g1_i5	1029	-158.71	165	-27.73	2840770	24	4746
dre-miR-92b-5p	c142664_g1_i13	1029	-151.78	152	-26.08	2848129	24	5845
dre-miR-103	c141035_g1_i2	1029	-123.96	156	-21.62	3073661	23	15922
dre-miR-107a-3p	c141035_g1_i2	1029	-130.7	156	-23.49	3117195	23	15922
dre-miR-124-4-5p	c133933_g2_i2	1029	-115.03	150	-20.91	3205142	22	6151
dre-miR-183-5p	c142479_g3_i2	1030	-140.73	162	-22.85	248604	23	9803
dre-miR-204-5p	c126164_g1_i1	1030	-140.69	159	-26.12	473192	22	7901
dre-miR-214	c142875_g1_i2	1030	-127.05	155	-23.84	640047	21	11568
dre-miR-17a-3p	c133651_g1_i1	1030	-136.61	162	-24.21	1640777	22	5900
dre-miR-20a-3p	c140176_g7_i11	1030	-125.14	154	-19.01	2008020	22	6260
dre-miR-20a-3p	c140176_g7_i6	1030	-125.14	154	-19.01	2023715	22	6194
dre-miR-25-5p	c133933_g2_i2	1030	-159.84	156	-25.63	2247394	23	6151
dre-miR-130c-5p	c136014_g1_i1	1030	-129.88	156	-23.23	3596449	22	15541
dre-miR-181b-5p	c138549_g1_i4	1031	-129.8	162	-21.93	155082	22	10808
dre-miR-17a-3p	c142808_g2_i8	1031	-147.91	163	-28.89	1637266	22	13201
dre-miR-17a-3p	c141666_g1_i2	1031	-152.97	154	-27.48	1653602	22	6328
dre-miR-16c-5p	c140143_g1_i2	1032	-116.76	159	-18.75	1574725	22	12859
dre-miR-20a-3p	c142736_g1_i3	1032	-135.71	157	-22.98	2016551	22	7627
dre-miR-92b-5p	c141541_g3_i10	1032	-145.78	156	-25.59	2848009	24	4992
dre-miR-205-3p	c140143_g1_i2	1033	-124.5	159	-20.64	529909	22	12859
dre-miR-9-5p	c141483_g4_i3	1033	-126.56	156	-23.17	1250584	23	7369
dre-miR-17a-3p	c134867_g1_i1	1033	-149.64	163	-26.81	1644396	22	11296
dre-miR-22b-5p	c142875_g1_i2	1033	-129.23	162	-22.34	2098436	22	11568
dre-miR-103	c137047_g3_i4	1033	-128.93	156	-26.21	3081603	23	7564
dre-miR-9-5p	c140969_g1_i3	1034	-119.17	159	-19.11	1241540	23	12599
dre-miR-9-5p	c140969_g1_i4	1034	-119.17	159	-19.11	1243531	23	12641
dre-miR-9-5p	c140969_g1_i1	1034	-119.17	159	-19.11	1254053	23	12425
dre-miR-15a-5p	c139750_g1_i2	1034	-127.17	151	-20.9	1436664	22	9000
dre-miR-15a-5p	c139750_g1_i1	1034	-127.17	151	-20.9	1443386	22	9018
dre-miR-15a-5p	c139750_g1_i4	1034	-127.17	151	-20.9	1445952	22	8985
dre-miR-15b-5p	c136141_g1_i1	1034	-131.75	155	-24.28	1488441	22	6650
dre-miR-17a-3p	c135951_g2_i2	1034	-140.29	159	-27.04	1635268	22	7934
dre-miR-17a-3p	c140514_g1_i4	1034	-138.91	158	-25.14	1640737	22	4579
dre-miR-27b-3p	c132034_g1_i1	1034	-138.92	157	-23.76	2438347	22	5919
dre-miR-27b-3p	c138448_g1_i1	1034	-133.78	152	-22.08	2454499	22	8195
dre-miR-107a-5p	c142828_g3_i2	1034	-122.18	156	-21.32	3091022	23	6439
dre-miR-107a-5p	c142828_g3_i12	1034	-122.18	156	-21.32	3102477	23	3916
dre-miR-15a-5p	c130997_g1_i2	1035	-134.14	159	-21.83	1449869	22	4882
dre-miR-16a	c138260_g3_i2	1035	-118.58	155	-20.97	1539469	22	5316
dre-miR-16b	c138260_g3_i2	1035	-121.65	155	-19.54	1561236	22	5316
dre-miR-20a-3p	c129753_g1_i1	1035	-138.32	158	-27.25	2002603	22	6488
dre-miR-22b-5p	c138568_g2_i2	1035	-129.57	156	-20.05	2102831	22	7468
dre-miR-24	c129018_g1_i2	1035	-128.17	156	-21.66	2220338	22	13337
dre-miR-107a-5p	c130048_g1_i1	1035	-119.46	161	-24.79	3093858	23	2724
dre-miR-124-6-5p	c140549_g1_i4	1035	-136.3	154	-24.23	3242859	22	13276
dre-miR-181a-5p	c138448_g1_i1	1036	-144.67	156	-23.15	604304	23	8195
dre-miR-15b-5p	c132848_g1_i4	1036	-119.74	155	-19.4	1486180	22	6057
dre-miR-15b-5p	c140167_g1_i3	1036	-119.31	155	-19.9	1487789	22	12892
dre-miR-15b-5p	c132848_g1_i3	1036	-119.74	155	-19.4	1492353	22	6400
dre-miR-15b-5p	c132848_g1_i2	1036	-119.74	155	-19.4	1493752	22	5539
dre-miR-15b-5p	c132848_g1_i1	1036	-119.74	155	-19.4	1499717	22	5428
dre-miR-15b-5p	c132848_g1_i5	1036	-119.74	155	-19.4	1501351	22	5449
dre-miR-16b	c138568_g2_i4	1036	-135.73	157	-24.85	1565356	22	15271
dre-miR-16c-5p	c138260_g3_i6	1036	-120.24	159	-22.34	1572143	22	10308
dre-miR-16c-5p	c140361_g1_i1	1036	-119.52	159	-20.72	1573447	22	8064
dre-miR-16c-5p	c140361_g1_i3	1036	-119.52	159	-20.72	1586153	22	7847
dre-miR-16c-5p	c138260_g3_i7	1036	-120.24	159	-22.34	1587728	22	10216
dre-miR-17a-2-3p	c133651_g1_i1	1036	-143.53	163	-26.39	1662544	23	5900
dre-miR-107a-5p	c131225_g1_i1	1036	-122.3	157	-25.15	3106439	23	6558
dre-miR-15b-5p	c140069_g1_i3	1037	-123.45	159	-20.95	1480981	22	9655
dre-miR-15b-5p	c137136_g1_i1	1037	-133.91	156	-24.54	1497783	22	8815
dre-miR-15b-5p	c137136_g1_i5	1037	-133.91	156	-24.54	1498298	22	8628
dre-miR-20a-3p	c127585_g2_i4	1037	-132.53	156	-22.22	2011858	22	9941
dre-miR-27d	c132034_g1_i1	1037	-133.24	157	-24.6	2503648	22	5919
dre-miR-92b-5p	c133412_g1_i4	1037	-138.91	167	-26.15	2837491	24	5006
dre-miR-92b-5p	c133412_g1_i1	1037	-138.91	167	-26.15	2841004	24	4748
dre-miR-107a-5p	c142378_g1_i6	1037	-137.7	153	-26.57	3093061	23	14580
dre-miR-107a-5p	c141254_g1_i2	1037	-115.17	168	-20.06	3098468	23	5233
dre-miR-107a-5p	c142378_g1_i7	1037	-137.7	153	-26.57	3100562	23	14511
dre-miR-107a-5p	c142378_g1_i3	1037	-137.7	153	-26.57	3102108	23	14655
dre-miR-15a-5p	c82367_g1_i2	1038	-127.38	152	-23.16	1437766	22	2666
dre-miR-16c-5p	c131498_g1_i2	1038	-114.11	153	-17.62	1579755	22	12635
dre-miR-16c-5p	c131498_g1_i1	1038	-114.11	153	-17.62	1587619	22	12743
dre-miR-17a-2-3p	c140291_g1_i2	1038	-131.1	164	-23.32	1666067	23	5147
dre-miR-92b-5p	c128623_g1_i2	1038	-159.19	160	-27.75	2847065	24	8193
dre-miR-107a-5p	c128623_g1_i2	1038	-113.75	156	-18.49	3108269	23	8193
dre-miR-15b-5p	c120137_g1_i1	1039	-122.26	155	-22.03	1488180	22	4101
dre-miR-25-5p	c141347_g1_i1	1039	-183.08	157	-29.5	2260548	23	9023
dre-miR-204-3p	c116210_g1_i3	1040	-151.05	157	-26.64	495796	22	1794
dre-miR-15b-5p	c138377_g2_i3	1040	-111.28	158	-17.43	1481638	22	5773
dre-miR-16b	c125038_g1_i1	1040	-116.28	158	-19.23	1555904	22	1926
dre-miR-16c-5p	c143596_g3_i11	1040	-120.27	158	-19.37	1580582	22	6156
dre-miR-25-5p	c130561_g1_i1	1040	-170.71	164	-28.61	2259933	23	2572
dre-miR-107a-5p	c140172_g3_i3	1040	-123.03	161	-20.51	3106628	23	5956
dre-miR-15a-5p	c132848_g1_i4	1041	-127.93	153	-19.95	1442646	22	6057
dre-miR-15a-5p	c132848_g1_i3	1041	-127.93	153	-19.95	1448819	22	6400
dre-miR-15a-5p	c132848_g1_i2	1041	-127.93	153	-19.95	1450218	22	5539
dre-miR-15a-5p	c132848_g1_i1	1041	-127.93	153	-19.95	1456183	22	5428
dre-miR-15a-5p	c132848_g1_i5	1041	-127.93	153	-19.95	1457817	22	5449
dre-miR-16a	c131498_g1_i2	1041	-118.72	155	-18.35	1536221	22	12635
dre-miR-16a	c131498_g1_i1	1041	-118.72	155	-18.35	1544085	22	12743
dre-miR-16b	c131498_g1_i2	1041	-120.67	155	-19.08	1557988	22	12635
dre-miR-16b	c131498_g1_i1	1041	-120.67	155	-19.08	1565852	22	12743
dre-miR-16c-5p	c137136_g1_i2	1041	-117.41	160	-21.63	1567836	22	8586
dre-miR-16c-5p	c137136_g1_i1	1041	-117.41	160	-21.63	1584851	22	8815
dre-miR-16c-5p	c137136_g1_i5	1041	-117.41	160	-21.63	1585366	22	8628
dre-miR-20a-3p	c142009_g1_i3	1041	-124.65	163	-23.31	2014317	22	11856
dre-miR-27e	c132034_g1_i2	1041	-139.48	162	-26.14	2543889	22	5975
dre-miR-92a-5p	c139623_g2_i4	1041	-144.63	154	-25.32	2770050	23	6221
dre-miR-107a-5p	c129117_g1_i4	1041	-118.34	158	-20.41	3096103	23	6608
dre-miR-107a-5p	c138377_g1_i3	1041	-132.95	162	-24.33	3098891	23	5655
dre-miR-107a-5p	c138377_g1_i4	1041	-132.95	162	-24.33	3104981	23	5782
dre-miR-107a-5p	c138377_g1_i1	1041	-132.95	162	-24.33	3110933	23	5640
dre-miR-15a-5p	c143992_g1_i8	1042	-125.02	176	-23.69	1437787	22	17315
dre-miR-15a-5p	c143992_g1_i7	1042	-125.02	176	-23.69	1444063	22	17464
dre-miR-15a-5p	c143992_g1_i10	1042	-125.02	176	-23.69	1444739	22	17180
dre-miR-15a-5p	c143992_g1_i2	1042	-125.02	176	-23.69	1447222	22	17168
dre-miR-15a-5p	c138260_g3_i2	1042	-126.66	160	-21.46	1452401	22	5316
dre-miR-15b-5p	c141405_g1_i7	1042	-126.84	155	-22.68	1485876	22	1724
dre-miR-16c-5p	c82367_g1_i2	1042	-114.97	159	-19.57	1568368	22	2666
dre-miR-17a-2-3p	c140734_g1_i2	1042	-154.37	165	-27.81	1663425	23	3816
dre-miR-27a-3p	c138026_g1_i1	1042	-130.41	161	-23.8	2414753	22	5514
dre-miR-214	c140068_g2_i1	1043	-142.64	164	-27.47	632087	21	4607
dre-miR-16a	c142808_g2_i8	1043	-123.66	154	-20.99	1528431	22	13201
dre-miR-92b-5p	c142253_g2_i1	1043	-157.19	166	-27.28	2837022	24	7283
dre-miR-430b-3p	c138946_g5_i3	1044	-121.87	159	-20.14	890908	23	4905
dre-miR-15a-5p	c139859_g1_i2	1044	-125.11	158	-21.5	1437473	22	5730
dre-miR-15b-5p	c139750_g1_i2	1044	-122.18	154	-20.95	1480198	22	9000
dre-miR-15b-5p	c139750_g1_i1	1044	-122.18	154	-20.95	1486920	22	9018
dre-miR-15b-5p	c139750_g1_i4	1044	-122.18	154	-20.95	1489486	22	8985
dre-miR-17a-3p	c142563_g4_i1	1044	-149.87	159	-26.12	1641109	22	10113
dre-miR-17a-2-3p	c138759_g1_i5	1044	-154.85	162	-26.11	1655140	23	7995
dre-miR-17a-2-3p	c84558_g1_i2	1044	-145.72	160	-24.86	1667851	23	2983
dre-miR-17a-2-3p	c138759_g1_i2	1044	-154.85	162	-26.11	1672617	23	8229
dre-miR-15a-5p	c107740_g1_i1	1045	-136.95	158	-27.32	1439223	22	5569
dre-miR-15b-5p	c134476_g1_i4	1045	-129.18	167	-23.42	1500637	22	3491
dre-miR-16b	c143596_g3_i11	1045	-123.98	159	-19.39	1558815	22	6156
dre-miR-24	c137136_g1_i2	1045	-163.07	163	-28.19	2220846	22	8586
dre-miR-24	c137136_g1_i1	1045	-163.07	163	-28.19	2237861	22	8815
dre-miR-24	c137136_g1_i5	1045	-163.07	163	-28.19	2238376	22	8628
dre-miR-27b-3p	c129328_g1_i2	1045	-143.28	167	-25.75	2450233	22	3463
dre-miR-27d	c129328_g1_i2	1045	-129.11	165	-22.4	2515534	22	3463
dre-miR-181b-5p	c138448_g1_i1	1046	-140.86	160	-24.05	168964	22	8195
dre-miR-221-5p	c139838_g1_i2	1046	-126.35	171	-21.88	726730	26	10548
dre-miR-221-5p	c139838_g1_i3	1046	-126.35	171	-21.88	736580	26	10804
dre-miR-15a-5p	c140969_g1_i3	1046	-115.04	156	-17.96	1437443	22	12599
dre-miR-15a-5p	c140969_g1_i4	1046	-115.04	156	-17.96	1439434	22	12641
dre-miR-15a-5p	c140969_g1_i1	1046	-115.04	156	-17.96	1449956	22	12425
dre-miR-15b-5p	c129018_g1_i2	1046	-117.22	154	-21.38	1480260	22	13337
dre-miR-25-5p	c143482_g3_i2	1046	-177.12	154	-31.04	2256381	23	7628
dre-miR-92a-5p	c139693_g3_i1	1046	-146.17	157	-23.9	2775954	23	6890
dre-miR-34a	c143992_g2_i2	1047	-159.15	160	-28.41	135005	22	9689
dre-miR-214	c129018_g1_i2	1047	-155.22	163	-28.61	631347	21	13337
dre-miR-214	c119638_g1_i1	1047	-161.55	162	-29.45	650854	21	5285
dre-miR-16a	c125909_g1_i4	1047	-121.35	157	-21.84	1537784	22	1967
dre-miR-16b	c140167_g1_i3	1047	-125.33	158	-21.82	1553090	22	12892
dre-miR-27c-3p	c138026_g1_i1	1047	-122.88	160	-19.09	2501821	21	5514
dre-miR-92b-5p	c134890_g2_i3	1047	-166.02	156	-29.74	2831351	24	5900
dre-miR-9-5p	c119506_g1_i2	1048	-129.54	164	-20.45	1261130	23	4994
dre-miR-15a-5p	c133499_g1_i1	1048	-137.58	160	-24.84	1454594	22	7030
dre-miR-16b	c141884_g3_i3	1048	-117.71	163	-20.34	1549640	22	9341
dre-miR-16b	c141884_g3_i10	1048	-117.71	163	-20.34	1559754	22	9237
dre-miR-17a-2-3p	c123446_g1_i1	1048	-141.54	165	-25.46	1673901	23	4975
dre-miR-19d-5p	c143936_g1_i9	1048	-173.03	157	-31.57	1947032	24	7795
dre-miR-19d-5p	c143936_g1_i1	1048	-173.03	157	-31.57	1947393	24	9110
dre-miR-20a-3p	c136964_g1_i1	1048	-140.11	157	-22.28	2006814	22	6228
dre-miR-22b-5p	c150671_g1_i1	1048	-137.93	158	-23.77	2108273	22	473
dre-miR-27a-3p	c129328_g1_i2	1048	-137.66	167	-25.02	2406699	22	3463
dre-miR-107a-5p	c144003_g4_i1	1048	-116.83	162	-22.51	3103772	23	15604
dre-miR-20a-3p	c143992_g1_i8	1049	-135.18	160	-28.93	2003729	22	17315
dre-miR-20a-3p	c143992_g1_i7	1049	-135.18	160	-28.93	2010005	22	17464
dre-miR-20a-3p	c143992_g1_i10	1049	-135.18	160	-28.93	2010681	22	17180
dre-miR-20a-3p	c132376_g1_i4	1049	-131.26	160	-23.19	2011860	22	4903
dre-miR-20a-3p	c143992_g1_i2	1049	-135.18	160	-28.93	2013164	22	17168
dre-miR-25-5p	c126920_g1_i2	1049	-177.89	160	-26.9	2262414	23	5480
dre-miR-27e	c129328_g1_i2	1049	-130.29	175	-27.8	2537301	22	3463
dre-miR-107a-5p	c129117_g1_i5	1049	-120.06	163	-20.41	3096929	23	7317
dre-miR-7a	c121528_g1_i1	1050	-123.56	165	-21.51	31154	23	10793
dre-miR-7a	c121528_g1_i2	1050	-123.56	165	-21.51	39848	23	10665
dre-miR-15a-5p	c140143_g1_i2	1050	-137.36	160	-23.78	1444123	22	12859
dre-miR-15a-5p	c117349_g1_i3	1050	-140.23	171	-26.99	1449661	22	6054
dre-miR-15a-5p	c141455_g1_i7	1050	-127.22	159	-20.29	1455727	22	7042
dre-miR-15b-5p	c141884_g3_i3	1050	-124.62	168	-21.12	1484339	22	9341
dre-miR-15b-5p	c141884_g3_i10	1050	-124.62	168	-21.12	1494453	22	9237
dre-miR-20a-3p	c138193_g1_i1	1050	-132.33	153	-22.95	2012531	22	6937
dre-miR-27a-3p	c138448_g1_i1	1050	-148.35	156	-24.66	2410965	22	8195
dre-miR-27b-3p	c138026_g1_i1	1050	-135.71	161	-25.24	2458287	22	5514
dre-miR-214	c142808_g2_i8	1051	-152.39	161	-28.62	635984	21	13201
dre-miR-15a-5p	c125909_g1_i4	1051	-128.7	160	-20.74	1450716	22	1967
dre-miR-15b-5p	c141552_g2_i1	1051	-119.72	155	-21.64	1482427	22	8559
dre-miR-22b-5p	c138549_g1_i4	1051	-127.33	161	-22.25	2092345	22	10808
dre-miR-7b	c142180_g2_i2	1052	-129.07	162	-23.16	12325	21	14252
dre-miR-16c-5p	c138377_g2_i3	1052	-118.4	156	-18.79	1568706	22	5773
dre-miR-25-5p	c140017_g1_i6	1052	-178.96	163	-29.59	2246889	23	6441
dre-miR-103	c141455_g1_i7	1053	-142.2	161	-23.4	3088252	23	7042
dre-miR-107a-5p	c139534_g1_i2	1053	-130.13	157	-22.69	3091817	23	7915
dre-miR-107a-3p	c141455_g1_i7	1053	-138.09	161	-21.78	3131786	23	7042
dre-miR-204-5p	c126170_g1_i1	1055	-128.87	157	-26.47	457329	22	5801
dre-miR-204-5p	c126170_g1_i2	1055	-128.87	157	-26.47	475621	22	5817
dre-miR-15b-5p	c140143_g1_i2	1055	-118.78	158	-20.69	1487657	22	12859
dre-miR-15b-5p	c130997_g1_i2	1055	-127.71	159	-22.83	1493403	22	4882
dre-miR-214	c135297_g1_i2	1056	-155.09	163	-27.61	647899	21	1658
dre-miR-430c-3p	c138946_g5_i3	1056	-127.16	166	-20.91	934442	22	4905
dre-miR-15a-5p	c139859_g1_i4	1056	-122.08	158	-21.39	1452683	22	4438
dre-miR-22b-3p	c142831_g3_i1	1056	-132.33	162	-21.71	2130516	22	15923
dre-miR-103	c143674_g1_i4	1056	-148.45	175	-25.53	3076170	23	10637
dre-miR-107a-3p	c143674_g1_i4	1056	-151.03	175	-26.72	3119704	23	10637
dre-miR-20a-3p	c139050_g3_i1	1057	-143.25	166	-23.52	2008735	22	6273
dre-miR-27d	c138026_g1_i1	1057	-132.35	161	-22.95	2523588	22	5514
dre-miR-107a-5p	c130880_g1_i1	1057	-125.3	156	-20.05	3105958	23	5774
dre-miR-92b-5p	c143936_g1_i1	1058	-158.37	165	-26.37	2839840	24	9110
dre-miR-15b-5p	c135029_g1_i3	1059	-120.1	161	-23.28	1496987	22	9860
dre-miR-25-5p	c115579_g3_i1	1059	-188.82	167	-34.94	2263623	23	3266
dre-miR-15a-5p	c142808_g2_i8	1061	-121.07	162	-22.76	1441363	22	13201
dre-miR-15a-5p	c120206_g1_i1	1061	-121.79	163	-19.83	1443373	22	6891
dre-miR-15a-5p	c138346_g2_i13	1061	-136.36	157	-25.61	1444903	22	9396
dre-miR-15a-5p	c138346_g2_i2	1061	-136.36	157	-25.61	1456041	22	9555
dre-miR-29a	c144057_g1_i5	1061	-113.05	163	-19.15	2569293	22	8787
dre-miR-214	c142830_g5_i15	1062	-177.61	166	-32.2	639954	21	7518
dre-miR-214	c142830_g5_i6	1062	-177.61	166	-32.2	643772	21	7594
dre-miR-214	c142830_g5_i14	1062	-177.61	166	-32.2	646636	21	7512
dre-miR-17a-2-3p	c132376_g1_i4	1062	-147.82	165	-24.57	1663588	23	4903
dre-miR-17a-2-3p	c133499_g1_i3	1063	-141.16	161	-24.15	1659508	23	6215
dre-miR-17a-2-3p	c133499_g1_i1	1063	-141.16	161	-24.15	1672264	23	7030
dre-miR-20b-3p	c142938_g2_i4	1063	-128.35	169	-21.05	1711590	23	7393
dre-miR-20b-3p	c142938_g2_i5	1063	-128.35	169	-21.05	1717711	23	7403
dre-miR-107a-5p	c137680_g1_i3	1063	-133.22	171	-24.11	3094924	23	6537
dre-miR-107a-5p	c135932_g1_i1	1063	-110.91	163	-17.52	3102562	23	6080
dre-miR-214	c136311_g1_i3	1066	-156.93	160	-29.51	634121	21	4157
dre-miR-214	c136311_g1_i4	1066	-156.93	160	-29.51	640071	21	3417
dre-miR-214	c136311_g1_i1	1066	-156.93	160	-29.51	649516	21	4169
dre-miR-20a-3p	c140514_g1_i4	1066	-148.02	168	-25.78	2010776	22	4579
dre-miR-27c-3p	c129328_g1_i2	1066	-140.05	166	-22.7	2493767	21	3463
dre-miR-92b-5p	c137045_g1_i3	1066	-162.16	169	-26.99	2840188	24	13245
dre-miR-92b-5p	c137045_g1_i4	1066	-162.16	169	-26.99	2845008	24	13317
dre-miR-92b-5p	c137045_g1_i1	1066	-162.16	169	-26.99	2849475	24	13263
dre-miR-15b-5p	c140292_g1_i2	1068	-116.25	163	-23.01	1490261	22	7254
dre-miR-214	c143862_g4_i2	1069	-182.75	170	-33.54	633696	21	4486
dre-miR-20a-3p	c142219_g2_i6	1069	-153.38	162	-26.04	2020156	22	9085
dre-miR-25-5p	c139919_g3_i1	1069	-184.76	174	-32.02	2242802	23	4158
dre-miR-25-5p	c139919_g3_i5	1070	-184.85	174	-32.02	2247063	23	4170
dre-miR-199-5p	c129980_g1_i2	1071	-132.3	167	-24.61	360395	23	10406
dre-miR-16a	c136375_g2_i1	1071	-135.34	176	-23.19	1535123	22	7704
dre-miR-15b-5p	c140969_g1_i3	1072	-126.81	171	-22.73	1480977	22	12599
dre-miR-15b-5p	c140969_g1_i4	1072	-126.81	171	-22.73	1482968	22	12641
dre-miR-15b-5p	c140969_g1_i1	1072	-126.81	171	-22.73	1493490	22	12425
dre-miR-27c-3p	c134026_g1_i4	1073	-133.49	161	-22.22	2485120	21	6877
dre-miR-221-5p	c138568_g2_i4	1075	-153.93	176	-29.43	738210	26	15271
dre-miR-24	c144182_g2_i5	1076	-174.8	175	-32.68	2222797	22	8977
dre-miR-24	c144182_g2_i3	1076	-174.8	175	-32.68	2232686	22	11038
dre-miR-27d	c134026_g1_i4	1076	-120.91	160	-18.73	2506887	22	6877
dre-miR-7a	c142180_g2_i2	1082	-129.87	169	-23.57	34092	23	14252
dre-miR-16c-5p	c141455_g1_i7	1086	-123.31	169	-20.01	1586329	22	7042
dre-miR-22a-3p	c139413_g1_i3	1088	-142.73	166	-24.03	2089090	22	9528
dre-miR-27b-3p	c134026_g1_i4	1090	-138.92	164	-24.5	2441586	22	6877
dre-miR-27a-3p	c134026_g1_i4	1091	-130.43	161	-20.66	2398052	22	6877
dre-miR-17a-3p	c141387_g3_i5	1142	-148.5	148	-22.6	1652244	22	5939
dre-miR-17a-3p	c142083_g1_i6	1143	-158.94	147	-23.95	1636960	22	3584
dre-miR-107a-5p	c142807_g1_i4	1143	-135.17	149	-19.65	3095067	23	4222
dre-miR-107a-5p	c142807_g1_i1	1143	-135.17	149	-19.65	3101232	23	5207
dre-miR-16a	c138346_g2_i13	1150	-136.89	152	-22.01	1531971	22	9396
dre-miR-16a	c138346_g2_i2	1150	-136.89	152	-22.01	1543109	22	9555
dre-miR-16b	c142865_g2_i4	1150	-135.86	149	-21.56	1565094	22	5557
dre-miR-17a-2-3p	c134770_g1_i1	1151	-146.37	154	-22.35	1661635	23	4249
dre-miR-17a-2-3p	c134770_g1_i3	1151	-146.37	154	-22.35	1674273	23	4053
dre-miR-22a-5p	c142736_g1_i3	1152	-148.54	149	-23.13	2060085	22	7627
dre-miR-17a-2-3p	c137088_g1_i1	1154	-138.4	149	-21.13	1658028	23	4450
dre-miR-17a-2-3p	c137088_g1_i3	1154	-138.4	149	-21.13	1670049	23	4356
dre-miR-17a-2-3p	c137088_g1_i2	1154	-138.4	149	-21.13	1674914	23	4841
dre-miR-17a-2-3p	c142736_g1_i3	1156	-148.85	153	-22.71	1668279	23	7627
dre-miR-92b-5p	c129642_g1_i2	1156	-175.02	156	-26.56	2848315	24	7650
dre-miR-22a-3p	c138966_g2_i3	1157	-150.38	151	-21.39	2088986	22	11737
dre-let-7b	c123094_g2_i2	1158	-178.64	156	-25.37	1003515	22	4811
dre-let-7b	c123094_g2_i1	1158	-178.64	156	-25.37	1019272	22	4871
dre-miR-17a-3p	c142736_g1_i3	1158	-154.25	153	-24.56	1646512	22	7627
dre-miR-15a-5p	c133681_g1_i1	1159	-144.99	149	-22.99	1450266	22	5607
dre-miR-16a	c105358_g1_i2	1159	-138.62	155	-21.29	1527662	22	6022
dre-miR-16b	c105358_g1_i2	1159	-142.91	155	-23.37	1549429	22	6022
dre-miR-16c-5p	c144161_g1_i7	1159	-131.36	154	-19.46	1588133	22	14716
dre-miR-16a	c136014_g1_i1	1160	-138.56	156	-22.94	1528584	22	15541
dre-miR-17a-3p	c136964_g1_i1	1160	-152.76	158	-25.66	1636775	22	6228
dre-miR-92a-5p	c141035_g1_i2	1160	-168.44	150	-26.44	2768923	23	15922
dre-miR-204-3p	c139623_g2_i4	1161	-177.29	155	-29.65	484515	22	6221
dre-miR-16b	c140231_g1_i1	1162	-140.36	150	-18.84	1547544	22	5692
dre-miR-18a	c139692_g3_i2	1162	-137.53	152	-21.97	1735337	22	7721
dre-miR-20a-3p	c138591_g1_i2	1163	-156.62	154	-25.13	2004763	22	8154
dre-miR-30e-3p	c133560_g1_i3	1163	-143.93	154	-22.47	2754548	22	14693
dre-miR-129-5p	c143992_g2_i2	1163	-169.23	168	-25.36	3487123	22	9689
dre-miR-199-5p	c141626_g1_i2	1164	-135.23	153	-21.24	363905	23	13230
dre-miR-15a-5p	c120137_g1_i1	1165	-147.33	160	-20.78	1444646	22	4101
dre-miR-222a-5p	c144182_g2_i3	1166	-172.8	161	-25.82	774297	23	11038
dre-miR-16c-5p	c136850_g3_i3	1166	-135.95	154	-21.18	1571289	22	4919
dre-miR-22a-5p	c133560_g1_i3	1166	-136.46	152	-18.95	2058004	22	14693
dre-miR-25-5p	c142350_g1_i1	1166	-219.51	162	-33.9	2253957	23	7999
dre-miR-25-5p	c142350_g1_i8	1166	-219.51	162	-33.9	2261733	23	8044
dre-miR-107a-5p	c140969_g1_i3	1167	-142.9	151	-24.3	3091735	23	12599
dre-miR-107a-5p	c140969_g1_i4	1167	-142.9	151	-24.3	3093726	23	12641
dre-miR-107a-5p	c140969_g1_i1	1167	-142.9	151	-24.3	3104248	23	12425
dre-miR-34a	c140585_g1_i1	1168	-176.83	152	-26.29	137739	22	12900
dre-miR-24	c138377_g2_i3	1168	-175.1	157	-28.91	2221716	22	5773
dre-let-7i	c141035_g1_i2	1169	-169.07	152	-28.9	1201699	22	15922
dre-miR-20a-3p	c140895_g1_i4	1169	-143.58	158	-21.04	2015060	22	9400
dre-miR-24	c142586_g4_i1	1169	-161.13	152	-24.69	2224458	22	12109
dre-miR-125c-3p	c143674_g1_i5	1169	-189.03	154	-31.34	3376210	22	19057
dre-miR-125c-3p	c143674_g1_i2	1169	-189.03	154	-31.34	3392947	22	19154
dre-miR-16a	c135029_g1_i3	1170	-145.73	151	-26.21	1540521	22	9860
dre-miR-16b	c135029_g1_i3	1170	-139.31	151	-21.61	1562288	22	9860
dre-miR-125b-2-3p	c143367_g2_i2	1170	-168.56	156	-23.66	3330157	21	14485
dre-miR-25-5p	c140472_g6_i12	1171	-195.72	156	-27.64	2244073	23	6059
dre-miR-25-5p	c140472_g6_i13	1171	-195.72	156	-27.64	2261629	23	6634
dre-miR-25-5p	c139118_g1_i1	1172	-198.65	154	-33.88	2244992	23	4702
dre-miR-27c-3p	c142009_g1_i3	1172	-143.52	159	-23.78	2493191	21	11856
dre-miR-17a-3p	c138193_g1_i1	1173	-155.8	152	-25.14	1642492	22	6937
dre-miR-20a-3p	c138346_g2_i13	1173	-168.55	157	-24.54	2010845	22	9396
dre-miR-20a-3p	c144003_g4_i1	1173	-154.59	156	-22.2	2015422	22	15604
dre-miR-20a-3p	c138346_g2_i2	1173	-168.55	157	-24.54	2021983	22	9555
dre-miR-27a-3p	c132034_g1_i2	1173	-164.49	157	-25.92	2413287	22	5975
dre-miR-128-3p	c142009_g1_i3	1173	-165.17	153	-25.12	3472706	22	11856
dre-miR-130c-5p	c142180_g2_i2	1173	-140.12	159	-19.23	3603880	22	14252
dre-miR-214	c140167_g1_i3	1174	-153.07	155	-21.45	638876	21	12892
dre-miR-222a-5p	c144161_g1_i7	1174	-150.61	156	-23.77	782754	23	14716
dre-miR-15a-5p	c134476_g1_i3	1174	-165.01	155	-27.72	1451246	22	7617
dre-miR-17a-2-3p	c142808_g2_i8	1174	-170.22	158	-28.25	1659033	23	13201
dre-miR-17a-2-3p	c142736_g1_i1	1174	-160.81	160	-27.81	1660115	23	6125
dre-let-7b	c141035_g1_i2	1175	-159.41	166	-22.64	1005796	22	15922
dre-miR-16c-5p	c132598_g1_i1	1175	-138.8	155	-24.02	1588512	22	5656
dre-miR-22a-5p	c140172_g3_i3	1175	-135.27	164	-20.61	2061812	22	5956
dre-miR-92b-5p	c143310_g1_i3	1175	-183.53	158	-32.05	2847088	24	10957
dre-miR-124-6-5p	c143992_g1_i7	1175	-163.24	156	-25.45	3228957	22	17464
dre-miR-25-5p	c140472_g6_i21	1176	-198.27	156	-28.53	2245504	23	8706
dre-miR-15a-5p	c142865_g2_i4	1177	-143.13	156	-20.31	1456259	22	5557
dre-miR-22b-5p	c140172_g3_i3	1177	-148.72	156	-22.41	2105346	22	5956
dre-miR-107a-5p	c131225_g1_i3	1178	-138.59	157	-25.15	3096793	23	6681
dre-miR-107a-5p	c131225_g1_i2	1178	-138.59	157	-25.15	3101774	23	7768
dre-miR-17a-2-3p	c142831_g3_i1	1179	-153.78	159	-27.94	1673409	23	15923
dre-miR-16c-5p	c136014_g1_i1	1180	-134.15	158	-18.57	1572118	22	15541
dre-miR-17a-3p	c142009_g1_i3	1180	-157.41	160	-23.31	1644278	22	11856
dre-miR-22b-3p	c138966_g2_i3	1180	-160.65	158	-24.09	2132520	22	11737
dre-miR-125b-2-3p	c133975_g1_i1	1180	-172.04	158	-25.84	3316273	21	6632
dre-miR-15b-5p	c134825_g1_i1	1181	-156.46	153	-24.93	1501035	22	5172
dre-miR-20a-3p	c133560_g1_i3	1181	-152	152	-22.42	2014470	22	14693
dre-miR-27b-3p	c132034_g1_i2	1181	-161.09	157	-23.76	2456821	22	5975
dre-miR-15b-5p	c137136_g1_i2	1182	-158.93	156	-25.02	1480768	22	8586
dre-miR-16c-5p	c125038_g1_i1	1182	-134.37	157	-19.93	1577671	22	1926
dre-miR-22a-5p	c144143_g2_i2	1182	-128.12	156	-19.48	2048123	22	8745
dre-miR-27d	c132034_g1_i2	1182	-152.06	157	-24.6	2522122	22	5975
dre-miR-92b-5p	c140987_g1_i6	1182	-172.5	162	-24.25	2848077	24	15902
dre-miR-92b-5p	c140987_g1_i1	1182	-172.5	162	-24.25	2848333	24	15839
dre-miR-107a-5p	c141254_g1_i9	1182	-129.52	168	-20.06	3099144	23	10087
dre-miR-222a-5p	c142808_g2_i8	1183	-156.31	154	-24.08	766586	23	13201
dre-miR-15b-5p	c140231_g1_i1	1183	-145.32	162	-23.44	1482243	22	5692
dre-miR-15b-5p	c138260_g3_i2	1183	-147.71	159	-21.65	1495935	22	5316
dre-miR-16c-5p	c115810_g1_i3	1183	-131.99	153	-18.6	1587872	22	9257
dre-miR-17a-2-3p	c142479_g3_i2	1183	-172.99	161	-27.08	1663459	23	9803
dre-miR-27c-3p	c132034_g1_i1	1184	-147.16	153	-20.75	2481881	21	5919
dre-miR-15b-5p	c144161_g1_i7	1185	-137.35	160	-20.61	1501065	22	14716
dre-miR-17a-3p	c142479_g3_i2	1185	-176.3	160	-26.97	1641692	22	9803
dre-miR-24	c107914_g1_i1	1185	-166.78	160	-25.98	2221348	22	8823
dre-miR-214	c142036_g5_i6	1186	-160.81	167	-27.34	647483	21	7220
dre-miR-16a	c121281_g1_i1	1186	-129.46	157	-17.65	1523725	22	4055
dre-miR-20a-3p	c140585_g1_i1	1186	-134.39	162	-20.38	2009701	22	12900
dre-miR-20a-3p	c140585_g1_i3	1186	-134.39	162	-20.38	2021491	22	12911
dre-miR-221-5p	c142831_g3_i1	1187	-161.68	165	-25.81	737428	26	15923
dre-miR-15a-5p	c129018_g1_i2	1187	-136.08	161	-24.28	1436726	22	13337
dre-miR-107a-5p	c132376_g1_i4	1187	-137.73	158	-24.94	3100210	23	4903
dre-miR-214	c135413_g3_i6	1190	-168.76	156	-23.88	641282	21	9272
dre-miR-16a	c140167_g1_i3	1190	-135.77	158	-20.85	1531323	22	12892
dre-miR-16b	c125909_g1_i4	1190	-136.63	157	-21.91	1559551	22	1967
dre-miR-130c-3p	c143379_g1_i6	1190	-131.51	160	-19.26	3619063	22	10708
dre-miR-130c-3p	c143379_g1_i8	1190	-131.51	160	-19.26	3631056	22	10691
dre-miR-16b	c142808_g2_i8	1191	-147.61	154	-22.5	1550198	22	13201
dre-miR-16c-5p	c140167_g1_i3	1191	-143.14	166	-24.51	1574857	22	12892
dre-miR-92a-5p	c137365_g1_i8	1191	-152.9	169	-24.53	2776036	23	5573
dre-miR-92b-5p	c141541_g3_i2	1191	-175.65	159	-29.87	2838164	24	5640
dre-miR-92b-5p	c141541_g3_i8	1191	-175.65	159	-29.87	2843102	24	5609
dre-miR-92b-5p	c137369_g1_i6	1191	-186.74	154	-30.31	2845449	24	7332
dre-miR-92b-5p	c137369_g1_i1	1191	-186.74	154	-30.31	2847420	24	7312
dre-miR-181b-5p	c128636_g1_i3	1193	-150.08	164	-28.54	172522	22	5465
dre-miR-24	c138759_g1_i5	1193	-186.22	160	-28.11	2221082	22	7995
dre-miR-24	c138759_g1_i2	1193	-186.22	160	-28.11	2238559	22	8229
dre-miR-25-5p	c143853_g6_i1	1193	-196.94	159	-27.34	2242455	23	3318
dre-miR-92b-5p	c136616_g1_i2	1193	-188.59	172	-29.26	2830441	24	8859
dre-miR-92b-5p	c134971_g1_i1	1193	-166.05	161	-26.45	2830495	24	6345
dre-miR-92b-5p	c134971_g1_i4	1193	-166.05	161	-26.45	2839787	24	7828
dre-miR-15a-5p	c134825_g1_i1	1194	-153.87	160	-26.04	1457501	22	5172
dre-miR-16c-5p	c125909_g1_i4	1194	-132.16	156	-18.42	1581318	22	1967
dre-miR-17a-3p	c132376_g1_i4	1194	-161.73	159	-24.99	1641821	22	4903
dre-miR-20a-3p	c131403_g1_i2	1195	-156.65	163	-24.68	2021858	22	4634
dre-miR-17a-3p	c129018_g1_i2	1196	-154.4	162	-22.25	1632629	22	13337
dre-miR-92a-2-5p	c142763_g5_i2	1196	-165.4	161	-25.56	2818264	23	15868
dre-miR-9-5p	c132174_g1_i1	1197	-140.4	164	-19.67	1259943	23	11023
dre-miR-15a-5p	c143596_g3_i11	1198	-149.24	163	-25.48	1449980	22	6156
dre-miR-15b-5p	c142865_g2_i3	1198	-159.02	160	-27.63	1485995	22	5644
dre-miR-15b-5p	c142865_g2_i4	1198	-159.02	160	-27.63	1499793	22	5557
dre-miR-20a-3p	c140734_g1_i2	1198	-172.28	163	-25.07	2011697	22	3816
dre-miR-27a-3p	c125928_g1_i1	1199	-154.54	159	-23.47	2410956	22	8877
dre-miR-20a-3p	c129117_g1_i4	1200	-158	166	-25.86	2007753	22	6608
dre-miR-20a-3p	c129117_g1_i5	1200	-158	166	-25.86	2008579	22	7317
dre-miR-92a-5p	c143992_g1_i8	1203	-166.1	158	-24.74	2765574	23	17315
dre-miR-92a-5p	c143992_g1_i7	1203	-166.1	158	-24.74	2771850	23	17464
dre-miR-92a-5p	c143992_g1_i10	1203	-166.1	158	-24.74	2772526	23	17180
dre-miR-92a-5p	c143992_g1_i2	1203	-166.1	158	-24.74	2775009	23	17168
dre-miR-130c-5p	c138694_g1_i3	1203	-138.38	157	-20.89	3592738	22	5633
dre-miR-34a	c142479_g3_i2	1204	-174.33	170	-26.49	139769	22	9803
dre-miR-92a-5p	c136968_g5_i3	1204	-162.09	161	-24.33	2775191	23	10003
dre-miR-92a-5p	c136968_g5_i1	1204	-162.09	161	-24.33	2781139	23	8216
dre-miR-125b-2-3p	c140374_g1_i2	1204	-212.49	160	-35.85	3322325	21	11503
dre-miR-22a-5p	c142253_g2_i1	1205	-168.9	162	-25.84	2053410	22	7283
dre-miR-27d	c125928_g1_i1	1205	-151.01	156	-24.31	2519791	22	8877
dre-miR-214	c140472_g6_i12	1206	-182	178	-30.31	633315	21	6059
dre-miR-214	c140472_g6_i13	1206	-182	178	-30.31	650871	21	6634
dre-miR-27e	c125928_g1_i1	1206	-149.03	156	-22.43	2541558	22	8877
dre-miR-15a-5p	c138377_g2_i3	1207	-146.59	164	-26.54	1438104	22	5773
dre-miR-92a-5p	c142763_g5_i2	1207	-172.57	164	-26.32	2774730	23	15868
dre-miR-430c-3p	c144003_g4_i1	1209	-146.57	173	-26.64	927072	22	15604
dre-miR-19b-5p	c140969_g1_i3	1209	-133.03	165	-18.82	1851016	22	12599
dre-miR-19b-5p	c140969_g1_i4	1209	-133.03	165	-18.82	1853007	22	12641
dre-miR-19b-5p	c140969_g1_i1	1209	-133.03	165	-18.82	1863529	22	12425
dre-miR-16c-5p	c140292_g1_i2	1210	-127.4	161	-16.93	1577329	22	7254
dre-miR-15a-5p	c135782_g3_i2	1212	-151.22	162	-22.39	1441935	22	1677
dre-miR-15a-5p	c135782_g3_i4	1212	-151.22	162	-22.39	1453668	22	1764
dre-miR-19c-5p	c128720_g1_i4	1212	-135.47	159	-19.65	1905764	22	2728
dre-miR-20a-3p	c129018_g1_i2	1212	-150.68	161	-22.56	2002668	22	13337
dre-miR-15b-5p	c143674_g1_i5	1213	-144.74	160	-22.36	1482481	22	19057
dre-miR-15b-5p	c143674_g1_i2	1213	-144.74	160	-22.36	1499218	22	19154
dre-miR-20a-3p	c138193_g1_i4	1213	-155.65	163	-23.32	2005356	22	8041
dre-miR-107a-5p	c122270_g1_i6	1217	-140.76	165	-20.25	3099510	23	6345
dre-miR-107a-5p	c122270_g1_i1	1217	-140.76	165	-20.25	3107353	23	6765
dre-miR-15a-5p	c141626_g1_i2	1218	-159.67	167	-24.64	1452255	22	13230
dre-miR-22b-5p	c142253_g2_i1	1220	-161.63	166	-25.44	2096944	22	7283
dre-miR-22b-3p	c139413_g1_i3	1221	-172.53	166	-26.63	2132624	22	9528
dre-miR-15b-5p	c124761_g1_i3	1222	-157.5	166	-23.79	1495446	22	3454
dre-miR-24	c144604_g2_i1	1223	-175.47	160	-26.94	2231924	22	7276
dre-miR-92b-5p	c143367_g2_i2	1227	-176.69	166	-26.21	2851283	24	14485
dre-miR-16c-5p	c130465_g1_i1	1228	-136.51	162	-21.69	1572162	22	4618
dre-miR-24	c144604_g2_i5	1229	-170.73	160	-25.87	2234269	22	7267
dre-miR-107a-5p	c140044_g3_i3	1236	-151.24	168	-24.63	3091450	23	13083
dre-miR-107a-5p	c140044_g3_i1	1236	-151.24	168	-24.63	3112165	23	12278
dre-miR-128-3p	c142419_g5_i6	1236	-161	162	-25.69	3465848	22	8989
dre-miR-25-5p	c142808_g2_i8	1241	-225.47	164	-32.88	2246742	23	13201
dre-miR-133a-3p	c114568_g1_i2	1289	-171.55	151	-24.67	3700518	22	4976
dre-miR-15a-5p	c141035_g1_i2	1294	-152.93	149	-21.63	1441136	22	15922
dre-miR-22a-5p	c139617_g4_i3	1294	-159.39	150	-22.14	2050368	22	6436
dre-miR-16c-5p	c140231_g1_i1	1300	-145.36	159	-17.41	1569311	22	5692
dre-miR-107a-5p	c126555_g3_i3	1302	-160.38	157	-22.54	3101372	23	8632
dre-miR-107a-5p	c126555_g3_i1	1302	-160.38	157	-22.54	3107831	23	9877
dre-miR-17a-3p	c138346_g2_i13	1305	-177.36	153	-24.61	1640806	22	9396
dre-miR-17a-3p	c138346_g2_i2	1305	-177.36	153	-24.61	1651944	22	9555
dre-miR-199-5p	c141626_g1_i5	1307	-151.2	153	-21.24	357634	23	11651
dre-miR-204-5p	c137687_g3_i3	1307	-169.99	156	-25.07	465511	22	6103
dre-miR-92b-5p	c140184_g1_i3	1307	-205.61	161	-26.12	2833792	24	7134
dre-miR-92b-5p	c140184_g1_i5	1307	-205.61	161	-26.12	2834766	24	6981
dre-miR-103	c143992_g1_i8	1307	-186.98	152	-25.35	3070312	23	17315
dre-miR-103	c143992_g1_i7	1307	-186.98	152	-25.35	3076588	23	17464
dre-miR-103	c143992_g1_i10	1307	-186.98	152	-25.35	3077264	23	17180
dre-miR-103	c143992_g1_i2	1307	-186.98	152	-25.35	3079747	23	17168
dre-miR-107a-3p	c143992_g1_i8	1307	-185.87	152	-25.08	3113846	23	17315
dre-miR-107a-3p	c143992_g1_i7	1307	-185.87	152	-25.08	3120122	23	17464
dre-miR-107a-3p	c143992_g1_i10	1307	-185.87	152	-25.08	3120798	23	17180
dre-miR-107a-3p	c143992_g1_i2	1307	-185.87	152	-25.08	3123281	23	17168
dre-miR-17a-3p	c140585_g1_i1	1308	-177.36	158	-23.24	1639662	22	12900
dre-miR-17a-3p	c140585_g1_i3	1308	-177.36	158	-23.24	1651452	22	12911
dre-miR-16c-5p	c105358_g1_i2	1309	-152.92	156	-21.29	1571196	22	6022
dre-miR-205-3p	c144161_g1_i7	1312	-160.24	154	-23.87	543317	22	14716
dre-miR-16a	c140231_g1_i1	1313	-150.68	151	-18.7	1525777	22	5692
dre-miR-15a-5p	c136014_g1_i1	1314	-147.58	153	-20.58	1441516	22	15541
dre-miR-22b-5p	c133560_g1_i3	1315	-156.72	155	-23.26	2101538	22	14693
dre-miR-34a	c140585_g1_i3	1316	-198.7	152	-26.29	149529	22	12911
dre-miR-107a-5p	c144143_g2_i2	1316	-162.96	153	-20.45	3092939	23	8745
dre-miR-214	c138355_g2_i1	1317	-177.87	160	-28.31	638029	21	4248
dre-miR-17a-2-3p	c135951_g2_i2	1317	-181.75	159	-26.63	1657035	23	7934
dre-miR-20a-3p	c142831_g3_i1	1317	-166	154	-20.32	2021681	22	15923
dre-miR-22b-5p	c138568_g2_i4	1317	-163.19	156	-20.05	2109531	22	15271
dre-miR-17a-3p	c127585_g2_i4	1318	-192.6	155	-26.59	1641819	22	9941
dre-miR-18a	c142586_g4_i1	1320	-165.11	162	-21.72	1723817	22	12109
dre-miR-25-5p	c132152_g1_i1	1321	-234.92	165	-27.7	2259780	23	6362
dre-miR-204-3p	c143674_g1_i5	1322	-175.31	155	-24.21	481199	22	19057
dre-miR-204-3p	c143674_g1_i2	1322	-175.31	155	-24.21	497936	22	19154
dre-miR-15a-5p	c138329_g1_i4	1322	-182.29	153	-22.94	1454300	22	14524
dre-miR-17a-2-3p	c138193_g1_i1	1322	-183.25	155	-29.43	1664259	23	6937
dre-miR-17a-2-3p	c142009_g1_i3	1322	-177.41	158	-22.18	1666045	23	11856
dre-miR-22b-5p	c141254_g1_i9	1322	-158.33	158	-21.61	2097862	22	10087
dre-miR-17a-3p	c138193_g1_i4	1323	-174.22	152	-25.14	1635317	22	8041
dre-miR-15a-5p	c105358_g1_i2	1324	-162.4	154	-21.95	1440594	22	6022
dre-miR-107a-5p	c143992_g1_i8	1325	-167.83	157	-23.06	3092079	23	17315
dre-miR-107a-5p	c143992_g1_i7	1325	-167.83	157	-23.06	3098355	23	17464
dre-miR-107a-5p	c143992_g1_i10	1325	-167.83	157	-23.06	3099031	23	17180
dre-miR-107a-5p	c143992_g1_i2	1325	-167.83	157	-23.06	3101514	23	17168
dre-miR-214	c142036_g5_i9	1326	-177.22	167	-27.34	632810	21	7667
dre-miR-15b-5p	c107740_g1_i1	1327	-174.58	166	-24.59	1482757	22	5569
dre-miR-15a-5p	c144161_g1_i7	1329	-162.04	154	-22.17	1457531	22	14716
dre-miR-15b-5p	c105358_g1_i2	1330	-166.14	154	-22.51	1484128	22	6022
dre-miR-22a-5p	c133774_g1_i1	1330	-169.84	156	-25.16	2058858	22	9767
dre-miR-22a-3p	c138329_g1_i4	1330	-173.65	156	-23.43	2085543	22	14524
dre-miR-16a	c142831_g3_i1	1331	-162.6	159	-20.43	1542807	22	15923
dre-miR-16b	c142831_g3_i1	1331	-160.03	159	-19.07	1564574	22	15923
dre-miR-15a-5p	c137481_g4_i4	1332	-183.51	163	-23.97	1453228	22	5621
dre-miR-15b-5p	c137481_g4_i4	1332	-177.11	155	-22.22	1496762	22	5621
dre-miR-214	c132152_g1_i1	1333	-170.51	169	-25.97	649022	21	6362
dre-miR-122	c138655_g1_i3	1333	-165.39	158	-23.25	3135566	22	4646
dre-miR-122	c138655_g1_i4	1333	-165.39	158	-23.25	3140388	22	4407
dre-miR-122	c138655_g1_i1	1333	-165.39	158	-23.25	3145883	22	4634
dre-miR-16c-5p	c142808_g2_i8	1335	-163.84	159	-24.7	1571965	22	13201
dre-miR-25-5p	c139118_g1_i2	1335	-219.93	164	-33.88	2261940	23	4970
dre-miR-222a-5p	c137136_g1_i2	1336	-179.26	164	-25.82	762457	23	8586
dre-miR-222a-5p	c137136_g1_i1	1336	-179.26	164	-25.82	779472	23	8815
dre-miR-222a-5p	c137136_g1_i5	1336	-179.26	164	-25.82	779987	23	8628
dre-miR-27c-3p	c132034_g1_i2	1336	-167.86	153	-20.75	2500355	21	5975
dre-miR-214	c140231_g1_i1	1338	-191.74	159	-27.35	633330	21	5692
dre-miR-130c-5p	c137687_g3_i3	1340	-157.38	163	-19.45	3599959	22	6103
dre-miR-204-5p	c117956_g1_i3	1344	-168.83	157	-20.79	460050	22	2294
dre-miR-15a-5p	c138260_g3_i6	1345	-160.46	160	-23.61	1441541	22	10308
dre-miR-15a-5p	c138260_g3_i7	1345	-160.46	160	-23.61	1457126	22	10216
dre-miR-125b-2-3p	c140374_g1_i5	1347	-233.21	160	-35.85	3327447	21	12507
dre-miR-19d-5p	c123094_g2_i2	1348	-241.24	157	-32.5	1939496	24	4811
dre-miR-19d-5p	c123094_g2_i1	1348	-241.24	157	-32.5	1955253	24	4871
dre-miR-22a-5p	c138785_g1_i2	1348	-167.37	160	-21.97	2064144	22	11668
dre-miR-22b-5p	c144604_g3_i4	1348	-160.51	162	-19.76	2096313	22	7294
dre-miR-17a-2-3p	c129018_g1_i2	1350	-177.88	160	-23.47	1654396	23	13337
dre-miR-204-5p	c63216_g2_i1	1351	-160.17	159	-21.61	465206	22	3252
dre-miR-22b-3p	c138329_g1_i4	1353	-188.24	164	-29.96	2129077	22	14524
dre-miR-24	c143674_g1_i4	1357	-200.39	166	-27.72	2227257	22	10637
dre-miR-107a-5p	c141326_g1_i7	1359	-154.26	166	-22.17	3110591	23	5923
dre-miR-92b-5p	c132174_g1_i1	1360	-204.22	166	-28.38	2848934	24	11023
dre-miR-15a-5p	c140292_g1_i2	1362	-157.84	164	-21.87	1446727	22	7254
dre-miR-92b-5p	c141663_g1_i1	1364	-186.85	161	-24.73	2841001	24	6636
dre-miR-22b-5p	c141606_g1_i1	1366	-146.33	160	-19.7	2107380	22	3456
dre-miR-16b	c130465_g1_i1	1381	-158.43	162	-23.12	1550395	22	4618
dre-miR-15b-5p	c121281_g1_i1	1384	-176.38	175	-25.16	1480191	22	4055
dre-miR-25-5p	c140123_g1_i2	1421	-253.71	168	-33.43	2262863	23	4513
dre-miR-92b-5p	c142125_g3_i2	1432	-226.87	147	-27.22	2846735	24	6895
dre-miR-17a-2-3p	c138346_g2_i13	1441	-198.83	153	-24.61	1662573	23	9396
dre-miR-17a-2-3p	c138346_g2_i2	1441	-198.83	153	-24.61	1673711	23	9555
dre-miR-20a-3p	c142736_g1_i1	1445	-181.95	152	-21.58	2008387	22	6125
dre-miR-17a-2-3p	c127585_g2_i4	1448	-208.12	153	-23.79	1663586	23	9941
dre-miR-27e	c142009_g1_i3	1455	-180.97	158	-21.69	2536725	22	11856
dre-miR-22b-3p	c138448_g1_i1	1456	-179.73	161	-21.33	2127994	22	8195
dre-miR-27b-3p	c142009_g1_i3	1457	-187.61	159	-26.62	2449657	22	11856
dre-miR-15a-5p	c132598_g1_i1	1459	-169.11	159	-22.35	1457910	22	5656
dre-miR-16c-5p	c138759_g1_i5	1459	-171.9	151	-20.79	1568072	22	7995
dre-miR-16c-5p	c138759_g1_i2	1459	-171.9	151	-20.79	1585549	22	8229
dre-miR-22a-5p	c138549_g1_i4	1459	-179.39	156	-21.59	2048811	22	10808
dre-miR-27d	c142009_g1_i3	1462	-189.38	160	-23.93	2514958	22	11856
dre-miR-214	c142219_g2_i6	1465	-192.08	160	-25.44	648835	21	9085
dre-miR-22a-3p	c138448_g1_i1	1467	-182.02	168	-21	2084460	22	8195
dre-miR-214	c142763_g5_i2	1469	-195.67	160	-24.07	641564	21	15868
dre-miR-17a-2-3p	c138193_g1_i4	1472	-201.67	155	-29.43	1657084	23	8041
dre-miR-17a-3p	c139687_g1_i3	1474	-207.22	157	-28.39	1637085	22	2833
dre-miR-92b-5p	c135413_g3_i6	1474	-228.31	156	-26.34	2839749	24	9272
dre-miR-19d-5p	c141035_g1_i2	1475	-237.12	157	-27.02	1941777	24	15922
dre-miR-92b-5p	c139222_g1_i4	1475	-230.9	165	-28.12	2841524	24	5409
dre-miR-17a-2-3p	c139687_g1_i3	1477	-214.98	156	-26.86	1658852	23	2833
dre-miR-204-5p	c142180_g2_i2	1483	-200.15	155	-21.72	469432	22	14252
dre-miR-15b-5p	c142831_g3_i1	1483	-187.78	155	-26.26	1499273	22	15923
dre-miR-181b-5p	c128636_g1_i5	1485	-186.9	164	-28.54	163217	22	5720
dre-miR-15b-5p	c136014_g1_i1	1485	-170.47	161	-22.63	1485050	22	15541
dre-miR-124-6-5p	c138448_g1_i1	1485	-226.51	159	-25.53	3238111	22	8195
dre-miR-27b-3p	c125928_g1_i1	1487	-187.76	157	-23.93	2454490	22	8877
dre-miR-16a	c138260_g3_i6	1488	-170.98	163	-20.97	1528609	22	10308
dre-miR-16a	c138260_g3_i7	1488	-170.98	163	-20.97	1544194	22	10216
dre-miR-16b	c138260_g3_i6	1488	-179.19	163	-24.17	1550376	22	10308
dre-miR-16b	c140292_g1_i2	1488	-166.57	160	-20.39	1555562	22	7254
dre-miR-16b	c138260_g3_i7	1488	-179.19	163	-24.17	1565961	22	10216
dre-miR-15b-5p	c138260_g3_i6	1491	-185.87	159	-21.98	1485075	22	10308
dre-miR-15b-5p	c138260_g3_i7	1491	-185.87	159	-21.98	1500660	22	10216
dre-miR-15a-5p	c134476_g1_i4	1493	-194.43	163	-27.72	1457103	22	3491
dre-miR-25-5p	c139687_g2_i4	1496	-260.84	159	-34.26	2244399	23	2851
dre-miR-15a-5p	c143674_g1_i5	1502	-179.33	168	-23.27	1438947	22	19057
dre-miR-15a-5p	c143674_g1_i2	1502	-179.33	168	-23.27	1455684	22	19154
dre-miR-214	c141575_g2_i3	1506	-211.93	162	-28.54	635107	21	10024
dre-miR-20a-3p	c139687_g1_i3	1510	-212.09	164	-24.33	2007124	22	2833
dre-miR-124-5p	c138448_g1_i1	1513	-224.21	163	-25.97	3194577	22	8195
dre-miR-15a-5p	c142831_g3_i1	1520	-205.91	168	-25.33	1455739	22	15923
dre-miR-17a-2-3p	c139617_g4_i3	1583	-214.5	152	-28.25	1658562	23	6436
dre-miR-92b-5p	c142631_g1_i1	1591	-257.28	154	-27.9	2848158	24	11453
dre-miR-34a	c142831_g3_i1	1592	-238.82	152	-26.05	149719	22	15923
dre-miR-27a-3p	c142009_g1_i3	1596	-212.64	163	-23.69	2406123	22	11856
dre-miR-214	c140017_g1_i6	1598	-227.12	157	-24.73	636131	21	6441
dre-miR-22b-5p	c138785_g1_i2	1598	-199.63	152	-25.87	2107678	22	11668
dre-miR-15a-5p	c141413_g1_i3	1602	-189.16	157	-20.45	1442829	22	7361
dre-miR-16a	c138759_g1_i5	1608	-184.22	151	-22.53	1524538	22	7995
dre-miR-16a	c138759_g1_i2	1608	-184.22	151	-22.53	1542015	22	8229
dre-miR-133a-3p	c117956_g1_i3	1610	-210.48	160	-24.6	3703333	22	2294
dre-miR-92b-5p	c142763_g5_i2	1611	-252.95	157	-30.88	2840031	24	15868
dre-miR-214	c140549_g1_i4	1613	-223.62	153	-27.21	652586	21	13276
dre-miR-107a-5p	c140987_g1_i6	1613	-215.47	158	-28.59	3109281	23	15902
dre-miR-107a-5p	c140987_g1_i1	1613	-215.47	158	-28.59	3109537	23	15839
dre-miR-16b	c138759_g1_i5	1617	-193.05	151	-20.79	1546305	22	7995
dre-miR-16b	c138759_g1_i2	1617	-193.05	151	-20.79	1563782	22	8229
dre-miR-30a-3p	c133560_g1_i3	1617	-199.4	156	-23.08	2623946	22	14693
dre-miR-199-5p	c142631_g1_i1	1619	-215.46	152	-27.68	366720	23	11453
dre-miR-16b	c121281_g1_i1	1619	-184.45	157	-19.5	1545492	22	4055
dre-miR-15a-5p	c140231_g1_i1	1621	-201.6	162	-25.11	1438709	22	5692
dre-miR-16c-5p	c121281_g1_i1	1623	-177.63	157	-17.7	1567259	22	4055
dre-miR-17a-2-3p	c140585_g1_i1	1623	-226.43	158	-26.27	1661429	23	12900
dre-miR-17a-2-3p	c140585_g1_i3	1623	-226.43	158	-26.27	1673219	23	12911
dre-miR-107a-5p	c141035_g1_i2	1629	-197.83	156	-27.31	3095428	23	15922
dre-miR-15b-5p	c141413_g1_i3	1636	-194.75	157	-20.83	1486363	22	7361
dre-miR-107a-5p	c133560_g1_i3	1641	-203.99	163	-22.73	3102820	23	14693
dre-miR-103	c143674_g1_i5	1642	-236.81	175	-30.09	3071472	23	19057
dre-miR-103	c143674_g1_i2	1642	-236.81	175	-30.09	3088209	23	19154
dre-miR-107a-3p	c143674_g1_i5	1642	-230.42	175	-26.72	3115006	23	19057
dre-miR-107a-3p	c143674_g1_i2	1642	-230.42	175	-26.72	3131743	23	19154
dre-miR-125b-5p	c137481_g4_i4	1642	-222.57	165	-25.65	3281656	22	5621
dre-miR-125c-5p	c137481_g4_i4	1644	-224.76	165	-25.35	3368724	22	5621
dre-miR-214	c143674_g1_i5	1647	-232.61	162	-25.23	633568	21	19057
dre-miR-214	c143674_g1_i2	1647	-232.61	162	-25.23	650305	21	19154
dre-miR-15b-5p	c130465_g1_i1	1650	-184.72	167	-20.61	1485094	22	4618
dre-miR-124-4-5p	c138448_g1_i1	1655	-208.91	159	-28.75	3216344	22	8195
dre-miR-125a	c137481_g4_i4	1655	-248.1	159	-30.26	3259889	22	5621
dre-miR-15b-5p	c141035_g1_i2	1656	-192.72	161	-24.81	1484670	22	15922
dre-miR-92a-2-5p	c105358_g1_i2	1656	-222.43	175	-25.88	2811915	23	6022
dre-miR-107a-5p	c140676_g2_i2	1671	-189.49	167	-23.88	3099504	23	7752
dre-miR-16a	c130465_g1_i1	1676	-186.22	162	-23.73	1528628	22	4618
dre-miR-221-5p	c142180_g2_i2	1688	-220.09	164	-25.05	730636	26	14252
dre-miR-22b-5p	c139617_g4_i3	1738	-226.38	152	-24.89	2093902	22	6436
dre-miR-107a-5p	c144604_g3_i4	1743	-205.26	159	-20.72	3097595	23	7294
dre-miR-17a-3p	c143992_g1_i8	1747	-240.63	152	-24.93	1633690	22	17315
dre-miR-17a-3p	c143992_g1_i7	1747	-240.63	152	-24.93	1639966	22	17464
dre-miR-17a-3p	c143992_g1_i10	1747	-240.63	152	-24.93	1640642	22	17180
dre-miR-17a-3p	c143992_g1_i2	1747	-240.63	152	-24.93	1643125	22	17168
dre-miR-214	c138568_g2_i4	1764	-253.04	161	-27.22	651142	21	15271
dre-miR-15b-5p	c141413_g1_i1	1773	-214.01	157	-20.83	1500675	22	6575
dre-miR-15a-5p	c138759_g1_i5	1781	-213.33	160	-21.9	1437470	22	7995
dre-miR-15a-5p	c138759_g1_i2	1781	-213.33	160	-21.9	1454947	22	8229
dre-miR-107a-5p	c135951_g2_i2	1793	-209.38	162	-19.39	3093657	23	7934
dre-miR-214	c138329_g1_i4	1801	-230.76	165	-26.64	648921	21	14524
dre-miR-92a-5p	c105358_g1_i2	1824	-246.05	168	-30.54	2768381	23	6022
dre-miR-9-5p	c138470_g2_i3	1826	-208.41	169	-20.77	1256123	23	10233
dre-miR-107a-5p	c140676_g2_i1	1828	-212.57	167	-23.88	3106751	23	7701
dre-miR-15a-5p	c141413_g1_i1	1893	-225.24	157	-20.45	1457141	22	6575
dre-miR-214	c137481_g4_i7	1903	-236.07	155	-23.87	652572	21	5449
dre-miR-107a-5p	c138785_g1_i2	1907	-248.39	166	-25.05	3108960	23	11668
dre-miR-214	c142479_g3_i2	1910	-271.34	161	-27.02	640410	21	9803
dre-miR-92a-5p	c143367_g2_i2	1928	-256.74	157	-25.65	2785982	23	14485
dre-miR-15a-5p	c121281_g1_i1	1942	-228.87	162	-20.03	1436657	22	4055
dre-miR-15a-5p	c130465_g1_i1	1982	-236.77	167	-24.6	1441560	22	4618
dre-miR-17a-2-3p	c143992_g1_i8	2020	-282.24	152	-26.89	1655457	23	17315
dre-miR-17a-2-3p	c143992_g1_i7	2020	-282.24	152	-26.89	1661733	23	17464
dre-miR-17a-2-3p	c143992_g1_i10	2020	-282.24	152	-26.89	1662409	23	17180
dre-miR-17a-2-3p	c143992_g1_i2	2020	-282.24	152	-26.89	1664892	23	17168
dre-miR-16c-5p	c141413_g1_i1	2046	-243.64	159	-22.53	1587743	22	6575
dre-miR-214	c141035_g1_i2	2049	-276.96	157	-26.47	635757	21	15922
dre-miR-16a	c141413_g1_i1	2050	-241.7	155	-20.53	1544209	22	6575
dre-miR-16a	c141413_g1_i3	2065	-238.81	159	-20.53	1529897	22	7361
dre-miR-15b-5p	c138759_g1_i5	2068	-245.76	160	-21.47	1481004	22	7995
dre-miR-16c-5p	c141413_g1_i3	2069	-244.68	159	-22.53	1573431	22	7361
dre-miR-30a-3p	c144143_g2_i2	2076	-237.08	168	-22.16	2614065	22	8745
dre-miR-107a-5p	c143992_g2_i2	2093	-246.88	160	-22.49	3095317	23	9689
dre-miR-204-5p	c138694_g1_i3	2137	-301.52	166	-26.99	458290	22	5633
dre-miR-16b	c141413_g1_i1	2190	-259.79	155	-22.53	1565976	22	6575
dre-miR-16b	c141413_g1_i3	2205	-258.16	159	-22.53	1551664	22	7361
dre-miR-15b-5p	c138759_g1_i2	2210	-269.92	160	-24.16	1498481	22	8229
dre-miR-107a-5p	c136961_g1_i1	2218	-248.97	159	-23.49	3110715	23	7357
dre-miR-24	c143674_g1_i5	2228	-326.44	166	-27.72	2222559	22	19057
dre-miR-24	c143674_g1_i2	2228	-326.44	166	-27.72	2239296	22	19154
dre-miR-214	c138759_g1_i5	2515	-342.21	161	-26.92	632091	21	7995
dre-miR-214	c138759_g1_i2	2515	-342.21	161	-26.92	649568	21	8229
dre-miR-29b	c137481_g4_i4	2524	-315.98	172	-25.54	2563345	22	5621
dre-miR-29b	c137481_g4_i7	2638	-319.32	166	-25.76	2568068	22	5449
dre-miR-15a-5p	c141575_g2_i3	2711	-345.29	162	-23.55	1440486	22	10024
dre-miR-16a	c141575_g2_i3	2813	-340	160	-21.02	1527554	22	10024
dre-miR-16b	c141575_g2_i3	2813	-339.64	160	-20.72	1549321	22	10024
dre-miR-214	c137481_g4_i4	2830	-372.44	155	-23.87	647849	21	5621
dre-miR-29a	c137481_g4_i7	2897	-342.55	162	-24.61	2589835	22	5449
dre-miR-29a	c137481_g4_i4	2925	-356.04	168	-24.61	2585112	22	5621
dre-miR-16c-5p	c141575_g2_i3	2949	-353.42	160	-20.59	1571088	22	10024
dre-miR-15b-5p	c141575_g2_i3	2951	-347.91	160	-22.88	1484020	22	10024
dre-miR-139-3p	c137905_g1_i7	1001	-157.88	149	-27.44	6129330	23	7282
dre-miR-139-3p	c128124_g1_i3	1002	-181.81	148	-31.64	6133900	23	4998
dre-miR-194b	c137455_g2_i2	1004	-104.45	151	-15.85	4697231	22	407
dre-miR-457b-5p	c144161_g1_i7	1004	-111.59	147	-20.61	5723863	22	14716
dre-miR-732	c133933_g1_i2	1006	-121.34	151	-21.24	6542982	22	2372
dre-miR-1788-5p	c140969_g1_i4	1006	-133.51	151	-25.74	6902951	22	12641
dre-miR-153c-5p	c130957_g1_i1	1008	-115.06	148	-18.65	4410621	22	5844
dre-miR-457a	c242840_g1_i1	1008	-115.33	150	-18.35	5698853	22	690
dre-miR-461	c142253_g2_i1	1008	-125.19	150	-24.82	5884402	22	7283
dre-miR-2196	c132917_g1_i4	1008	-147.29	150	-27.94	7103101	24	5925
dre-miR-430a-5p	c134876_g1_i3	1009	-140.01	148	-22.43	5425033	21	10335
dre-miR-730	c142289_g1_i5	1009	-129.75	151	-21.06	6487641	23	9242
dre-miR-2196	c116195_g1_i2	1009	-157.1	155	-26.69	7111704	24	4256
dre-miR-138-5p	c139963_g9_i3	1010	-137.71	158	-25.22	3908327	22	5640
dre-miR-138-5p	c135038_g2_i3	1010	-143.41	156	-24.24	3912945	22	3606
dre-miR-2196	c140272_g1_i1	1010	-150.3	152	-28.18	7113650	24	5475
dre-miR-138-5p	c139378_g3_i1	1011	-156.65	157	-28.05	3899270	22	5248
dre-miR-138-5p	c133430_g2_i1	1011	-129.2	151	-22.11	3907996	22	2905
dre-miR-363-5p	c139338_g1_i2	1011	-160.1	151	-25.93	5252808	23	9339
dre-miR-430a-4-5p	c134876_g1_i3	1011	-130.98	149	-24.29	5446800	21	10335
dre-miR-430a-11-5p	c134876_g1_i3	1011	-130.98	149	-24.29	5468567	21	10335
dre-miR-430a-12-5p	c134876_g1_i3	1011	-130.98	149	-24.29	5490334	21	10335
dre-miR-430a-13-5p	c134876_g1_i3	1011	-130.98	149	-24.29	5512101	21	10335
dre-miR-430a-14-5p	c134876_g1_i3	1011	-130.98	149	-24.29	5533868	21	10335
dre-miR-430a-15-5p	c134876_g1_i3	1011	-130.98	149	-24.29	5555635	21	10335
dre-miR-430a-16-5p	c134876_g1_i3	1011	-130.98	149	-24.29	5577402	21	10335
dre-miR-430a-17-5p	c134876_g1_i3	1011	-130.98	149	-24.29	5599169	21	10335
dre-miR-430i-5p	c134876_g1_i3	1011	-130.98	149	-24.29	5620936	21	10335
dre-miR-153b-5p	c126555_g3_i1	1012	-119.79	151	-19.45	4326783	22	9877
dre-miR-430a-5p	c128882_g1_i3	1012	-140.95	155	-23.41	5424161	21	5273
dre-miR-139-3p	c136759_g1_i8	1012	-178.07	150	-33.28	6134781	23	5520
dre-miR-138-5p	c126164_g1_i1	1013	-144.83	149	-23.47	3912378	22	7901
dre-miR-145-5p	c142875_g1_i2	1013	-143.23	149	-23.7	4166301	22	11568
dre-miR-139-3p	c136511_g1_i1	1013	-166.26	153	-27.43	6131511	23	4410
dre-miR-139-3p	c136511_g1_i3	1013	-166.26	153	-27.43	6134405	23	4410
dre-miR-139-3p	c142808_g2_i10	1013	-178.7	150	-29.2	6134941	23	5977
dre-miR-139-3p	c119638_g1_i1	1013	-191.77	150	-35.98	6136138	23	5285
dre-miR-153a-5p	c138568_g2_i4	1014	-120.23	155	-19.92	4373299	23	15271
dre-miR-2193	c122296_g1_i1	1014	-114.79	156	-21.73	7329701	24	5318
dre-miR-138-5p	c143365_g2_i3	1015	-129.81	158	-24.81	3917099	22	6481
dre-miR-139-3p	c126164_g1_i1	1016	-169.22	152	-27.2	6132612	23	7901
dre-miR-1388-3p	c137801_g1_i1	1016	-138.59	156	-26.55	6885557	22	6427
dre-miR-2196	c135985_g1_i1	1016	-151.01	160	-25.8	7100470	24	4857
dre-miR-153a-5p	c140044_g3_i3	1017	-124.98	149	-23.17	4353936	23	13083
dre-miR-153a-5p	c140044_g3_i1	1017	-124.98	149	-23.17	4374651	23	12278
dre-miR-2196	c142425_g3_i1	1017	-156.06	158	-28.28	7097197	24	10444
dre-miR-139-3p	c139323_g3_i4	1018	-187.48	149	-35.93	6121302	23	5005
dre-miR-139-3p	c138478_g2_i2	1018	-179.21	161	-33.84	6130584	23	4991
dre-miR-139-3p	c139880_g1_i4	1018	-178.89	152	-31.11	6137791	23	4498
dre-miR-138-5p	c142586_g4_i1	1019	-136.94	155	-23.08	3900517	22	12109
dre-miR-338	c140976_g1_i3	1019	-124.09	153	-23.04	5231967	22	7365
dre-miR-139-3p	c133747_g1_i9	1021	-178.63	154	-32.51	6119050	23	3526
dre-miR-34c-5p	c140143_g1_i2	1021	-133.96	149	-21.03	6450533	23	12859
dre-miR-2196	c140569_g4_i3	1021	-132.43	155	-21.82	7111414	24	5911
dre-miR-139-3p	c139821_g1_i2	1022	-194.77	155	-41.42	6138087	23	3940
dre-miR-15c	c143751_g2_i10	1023	-137.94	152	-24.24	6584173	21	5692
dre-miR-15c	c143751_g2_i6	1023	-137.94	152	-24.24	6591711	21	5928
dre-miR-363-5p	c142378_g1_i6	1024	-138.98	150	-25.48	5247994	23	14580
dre-miR-363-5p	c142378_g1_i7	1024	-138.98	150	-25.48	5255495	23	14511
dre-miR-363-5p	c142378_g1_i3	1024	-138.98	150	-25.48	5257041	23	14655
dre-miR-139-3p	c126726_g1_i1	1024	-175.22	152	-32.31	6117763	23	7512
dre-miR-139-3p	c132100_g1_i2	1024	-157.52	157	-27.24	6121624	23	5826
dre-miR-143	c142219_g2_i6	1025	-128.88	159	-21.51	4109788	21	9085
dre-miR-139-3p	c141347_g1_i1	1025	-199.67	157	-33.33	6135074	23	9023
dre-miR-107b	c141035_g1_i2	1025	-123.65	154	-22.56	7035255	21	15922
dre-miR-2196	c140626_g3_i1	1025	-156.42	154	-27.65	7116699	24	6505
dre-miR-216b	c142378_g1_i3	1026	-122	153	-20.56	5039371	22	14655
dre-miR-139-3p	c141864_g2_i3	1026	-184.38	157	-31.83	6130358	23	6029
dre-miR-34c-5p	c143338_g2_i3	1026	-123.63	151	-21.45	6446066	23	14437
dre-miR-34c-5p	c141413_g1_i1	1026	-125.34	151	-22.18	6463551	23	6575
dre-miR-2196	c138655_g1_i3	1026	-172.16	151	-29.54	7097160	24	4646
dre-miR-2196	c138655_g1_i1	1026	-172.16	151	-29.54	7107477	24	4634
dre-miR-2196	c138966_g2_i3	1026	-152.25	157	-28.48	7117163	24	11737
dre-miR-456	c143674_g1_i4	1027	-140.52	162	-28.21	5666443	22	10637
dre-miR-456	c141987_g8_i6	1027	-124.34	155	-21.16	5678317	22	6456
dre-miR-2185-5p	c138749_g1_i10	1027	-141.19	154	-26.09	6794134	21	3071
dre-miR-2185-5p	c138749_g1_i9	1027	-141.19	154	-26.09	6807398	21	3029
dre-miR-2196	c140626_g2_i2	1027	-165.42	160	-28.31	7096514	24	9032
dre-miR-2196	c140626_g2_i3	1027	-165.42	160	-28.31	7117731	24	8902
dre-miR-7146-3p	c137481_g4_i4	1027	-143.07	155	-24.16	7482687	22	5621
dre-miR-1306	c126164_g1_i1	1027	-168.52	156	-30.25	7612768	22	7901
dre-miR-34c-5p	c107740_g1_i1	1028	-125.79	158	-19.25	6445633	23	5569
dre-miR-457b-5p	c132152_g1_i1	1029	-122.63	153	-21.79	5720733	22	6362
dre-miR-2196	c144003_g4_i1	1029	-141.08	154	-26.44	7108900	24	15604
dre-miR-2196	c140648_g8_i2	1030	-142.44	153	-27.59	7110455	24	7234
dre-miR-139-3p	c109474_g1_i1	1031	-176.39	161	-31.34	6130533	23	2816
dre-miR-2196	c135676_g1_i1	1031	-148.49	160	-27.94	7102534	24	8433
dre-miR-138-5p	c139251_g1_i7	1032	-145.28	156	-24.35	3912427	22	4823
dre-miR-148	c132253_g1_i3	1032	-110.98	151	-17.98	4254168	22	6815
dre-miR-153b-5p	c143138_g1_i4	1032	-123.21	164	-21.33	4316990	22	3608
dre-miR-153a-5p	c138876_g1_i3	1032	-122	160	-19.82	4357260	23	6092
dre-miR-363-5p	c144182_g2_i5	1032	-151.66	157	-27.74	5248410	23	8977
dre-miR-363-5p	c144182_g2_i3	1032	-151.66	157	-27.74	5258299	23	11038
dre-miR-457a	c107740_g1_i1	1032	-128.63	154	-21.62	5683788	22	5569
dre-miR-457b-5p	c115810_g1_i3	1032	-120.35	157	-19.7	5723602	22	9257
dre-miR-139-3p	c136014_g1_i1	1032	-172.52	157	-31.87	6121421	23	15541
dre-miR-15c	c127093_g1_i1	1032	-138.62	156	-23.27	6585993	21	4966
dre-miR-1388-3p	c143674_g1_i2	1032	-129.24	158	-24.63	6897434	22	19154
dre-miR-2196	c115505_g1_i1	1032	-169.98	157	-30.33	7101572	24	4181
dre-miR-2196	c115505_g1_i3	1032	-169.98	157	-30.33	7110697	24	4262
dre-miR-457a	c133774_g1_i1	1033	-114.14	156	-19.51	5693947	22	9767
dre-miR-139-3p	c135191_g1_i4	1033	-178.06	162	-33.2	6118067	23	11650
dre-miR-139-3p	c130844_g1_i4	1033	-174.23	151	-31.03	6119632	23	5911
dre-miR-139-3p	c139457_g2_i2	1033	-186.33	156	-32.01	6121059	23	7085
dre-miR-139-3p	c135191_g1_i1	1033	-178.06	162	-33.2	6121917	23	11665
dre-miR-139-3p	c115810_g1_i3	1033	-180.55	159	-29.98	6137175	23	9257
dre-miR-15c	c126920_g1_i2	1033	-132.42	156	-27.45	6594047	21	5480
dre-miR-2196	c126579_g1_i2	1033	-152.28	158	-28.73	7100683	24	5406
dre-miR-2196	c126579_g1_i1	1033	-152.28	158	-28.73	7107900	24	5427
dre-miR-363-5p	c140969_g1_i3	1034	-132.56	155	-21.93	5246668	23	12599
dre-miR-363-5p	c140969_g1_i4	1034	-132.56	155	-21.93	5248659	23	12641
dre-miR-363-5p	c140969_g1_i1	1034	-132.56	155	-21.93	5259181	23	12425
dre-miR-34b	c136375_g2_i1	1034	-148.62	164	-26.36	6040892	23	7704
dre-miR-2185-5p	c138749_g1_i6	1034	-148.86	154	-26.09	6795889	21	3086
dre-miR-2196	c138300_g8_i1	1034	-140.34	160	-25.15	7100057	24	5072
dre-miR-2196	c140123_g1_i2	1034	-151.32	157	-23.54	7116904	24	4513
dre-miR-145-5p	c139695_g4_i2	1035	-132.1	163	-20.27	4168650	22	3392
dre-miR-456	c143992_g1_i10	1035	-149.08	154	-25.22	5667537	22	17180
dre-miR-456	c143992_g1_i2	1035	-149.08	154	-25.22	5670020	22	17168
dre-miR-1388-3p	c138759_g1_i5	1035	-141	151	-27.26	6879220	22	7995
dre-miR-1388-3p	c138759_g1_i2	1035	-141	151	-27.26	6896697	22	8229
dre-miR-2196	c139691_g1_i5	1035	-152.16	158	-24.5	7104747	24	3227
dre-miR-2196	c132618_g1_i3	1035	-158.63	160	-27.82	7113533	24	4534
dre-miR-1306	c141455_g1_i7	1035	-169	154	-30.79	7615788	22	7042
dre-miR-146a	c143338_g2_i3	1036	-121.58	155	-21.38	4204065	23	14437
dre-miR-34c-5p	c115810_g1_i3	1036	-133.77	163	-24.21	6463680	23	9257
dre-miR-15c	c136242_g1_i1	1036	-137.36	156	-23.79	6580474	21	8134
dre-miR-2196	c142031_g1_i7	1036	-148.78	158	-31.92	7100860	24	7873
dre-miR-138-5p	c97918_g1_i2	1037	-135.81	156	-22.56	3917188	22	4004
dre-miR-457a	c137481_g4_i4	1037	-122.65	156	-20.14	5697793	22	5621
dre-miR-2196	c140603_g9_i4	1037	-136.4	161	-21.81	7100626	24	6225
dre-miR-2196	c141663_g1_i1	1037	-145.51	154	-25.84	7107333	24	6636
dre-miR-2196	c140603_g9_i5	1037	-136.4	161	-21.81	7117483	24	6419
dre-miR-138-5p	c107914_g1_i1	1038	-141.43	152	-26.09	3897407	22	8823
dre-miR-219-3p	c135952_g2_i1	1038	-151.53	164	-26.41	5112912	23	4268
dre-miR-139-3p	c132152_g1_i1	1038	-189.63	157	-29.71	6134306	23	6362
dre-miR-2185-5p	c140017_g1_i6	1038	-167	162	-33.74	6796192	21	6441
dre-miR-7146-3p	c137481_g4_i7	1038	-143.46	155	-24.16	7487410	22	5449
dre-miR-153c-5p	c144143_g2_i2	1039	-107.63	155	-16.79	4398959	22	8745
dre-miR-2196	c116300_g2_i4	1039	-158.31	155	-26.46	7097402	24	5083
dre-miR-2196	c116300_g2_i3	1039	-158.31	155	-26.46	7101080	24	5176
dre-miR-2196	c136375_g2_i1	1039	-155.12	159	-29.72	7107475	24	7704
dre-miR-138-5p	c140201_g2_i10	1040	-155.08	157	-25.79	3898844	22	8581
dre-miR-138-5p	c141254_g1_i9	1040	-142.63	167	-26.49	3904523	22	10087
dre-miR-138-5p	c140201_g2_i9	1040	-155.08	157	-25.79	3914157	22	8617
dre-miR-457a	c115810_g1_i3	1040	-114.46	157	-19.62	5701835	22	9257
dre-miR-139-3p	c139687_g2_i4	1040	-188.42	155	-32.63	6118925	23	2851
dre-miR-139-3p	c139118_g1_i1	1041	-185.3	161	-30.11	6119518	23	4702
dre-miR-139-3p	c139118_g1_i2	1041	-185.3	161	-30.11	6136466	23	4970
dre-miR-730	c140044_g3_i1	1041	-139.2	158	-23.01	6507817	23	12278
dre-miR-2196	c125282_g1_i6	1041	-147.07	156	-27.03	7097968	24	3757
dre-miR-456	c144182_g2_i3	1042	-150.58	154	-25.06	5671872	22	11038
dre-miR-457a	c136014_g1_i1	1042	-117.69	158	-20.36	5686081	22	15541
dre-miR-2196	c120426_g1_i1	1042	-179.2	160	-33.3	7096167	24	3026
dre-miR-2196	c138583_g1_i2	1042	-149.69	159	-28.31	7097972	24	6294
dre-miR-2196	c140143_g1_i2	1042	-151.08	160	-25.98	7103543	24	12859
dre-miR-2196	c140044_g3_i1	1042	-147.04	172	-30.03	7117293	24	12278
dre-miR-138-5p	c140472_g6_i21	1043	-139.55	167	-23.69	3899796	22	8706
dre-miR-457a	c138260_g3_i2	1043	-127.19	158	-26.41	5696966	22	5316
dre-miR-2196	c138942_g4_i3	1044	-150.53	160	-25.68	7114052	24	4052
dre-miR-107b	c143674_g1_i4	1045	-147.71	175	-26.04	7037764	21	10637
dre-miR-2196	c139972_g1_i1	1045	-153.31	159	-30.98	7115263	24	3144
dre-miR-145-5p	c144143_g2_i2	1046	-117.03	162	-20.88	4159522	22	8745
dre-miR-730	c141046_g1_i1	1046	-135.24	159	-25.39	6489953	23	6114
dre-miR-2185-5p	c143782_g1_i1	1046	-146.79	158	-25.47	6798765	21	4131
dre-miR-2196	c140987_g1_i6	1046	-151.25	161	-25.02	7114409	24	15902
dre-miR-2196	c140987_g1_i1	1046	-151.25	161	-25.02	7114665	24	15839
dre-miR-375	c96729_g2_i1	1047	-131.86	155	-24.96	5320369	22	2133
dre-miR-34b	c107740_g1_i1	1047	-131.48	163	-23.91	6032060	23	5569
dre-miR-2196	c134183_g1_i1	1047	-159.03	157	-27.39	7100483	24	8652
dre-miR-138-5p	c131733_g1_i4	1048	-147.14	166	-24.76	3909510	22	5197
dre-miR-138-5p	c143128_g1_i2	1048	-130.54	160	-21.7	3915403	22	2656
dre-miR-138-5p	c131733_g1_i1	1048	-147.14	166	-24.76	3916768	22	5134
dre-miR-2196	c133622_g2_i4	1048	-157.46	171	-30.98	7101635	24	6377
dre-miR-2196	c140585_g1_i1	1048	-153.7	170	-28.73	7103179	24	12900
dre-miR-2196	c140896_g4_i1	1048	-141.31	164	-28.59	7111377	24	4479
dre-miR-2196	c142378_g1_i6	1049	-151.6	160	-28.11	7098189	24	14580
dre-miR-2196	c140184_g1_i3	1049	-155.73	166	-27.63	7100124	24	7134
dre-miR-2196	c142378_g1_i7	1049	-151.6	160	-28.11	7105690	24	14511
dre-miR-2196	c142298_g1_i1	1049	-169.78	163	-28.21	7106151	24	5440
dre-miR-2196	c142378_g1_i3	1049	-151.6	160	-28.11	7107236	24	14655
dre-miR-1306	c104641_g1_i1	1049	-181.33	159	-32.46	7599504	22	2567
dre-miR-2196	c135751_g2_i3	1050	-147.76	166	-24.9	7099556	24	7481
dre-miR-138-5p	c137905_g1_i7	1051	-143.83	164	-24.25	3909096	22	7282
dre-miR-730	c38568_g1_i1	1051	-133.05	164	-23.49	6488318	23	4057
dre-miR-457a	c131498_g1_i2	1052	-119.2	167	-22.14	5693718	22	12635
dre-miR-457a	c131498_g1_i1	1052	-119.2	167	-22.14	5701582	22	12743
dre-miR-2196	c142289_g1_i5	1052	-158.95	164	-31.18	7097117	24	9242
dre-miR-2196	c142289_g1_i1	1052	-158.95	164	-31.18	7105048	24	9104
dre-miR-2196	c138648_g1_i3	1053	-151.58	162	-28.26	7108412	24	3488
dre-miR-1306	c130579_g3_i1	1053	-192.51	156	-31.71	7607549	22	1689
dre-miR-145-5p	c124080_g1_i1	1055	-141.32	169	-29.76	4164486	22	2781
dre-miR-145-5p	c124080_g1_i2	1055	-141.32	169	-29.76	4170530	22	2763
dre-miR-430a-5p	c140585_g1_i1	1055	-149.1	164	-27.79	5427120	21	12900
dre-miR-430a-5p	c140585_g1_i3	1055	-149.1	164	-27.79	5438910	21	12911
dre-miR-1788-3p	c136575_g1_i2	1055	-133.74	163	-24.7	6927127	21	8496
dre-miR-1788-3p	c136575_g1_i4	1055	-133.74	163	-24.7	6933761	21	8515
dre-miR-2196	c134591_g1_i1	1055	-140.07	161	-25.08	7098285	24	6910
dre-miR-139-3p	c129810_g1_i2	1056	-172.26	165	-32.32	6129177	23	6172
dre-miR-2196	c140044_g3_i14	1056	-147.34	163	-30.83	7096484	24	9508
dre-miR-2196	c135306_g1_i3	1056	-140.47	161	-24.51	7114122	24	4129
dre-miR-457b-5p	c138260_g3_i6	1057	-131.61	167	-26.59	5707873	22	10308
dre-miR-457b-5p	c138260_g3_i7	1057	-131.61	167	-26.59	5723458	22	10216
dre-miR-2196	c138568_g2_i4	1057	-158.93	165	-29.54	7115941	24	15271
dre-miR-456	c142398_g3_i2	1059	-145.22	163	-28.4	5666422	22	9692
dre-miR-456	c142398_g3_i9	1059	-145.22	163	-28.4	5676999	22	9594
dre-miR-2196	c141977_g6_i4	1059	-152.13	165	-33.46	7104300	24	5936
dre-miR-2196	c136141_g1_i1	1059	-160.5	168	-29.85	7104327	24	6650
dre-miR-2196	c131028_g1_i3	1060	-144.92	159	-23.63	7115591	24	3500
dre-miR-2196	c143936_g1_i1	1062	-164.88	157	-29.11	7106172	24	9110
dre-miR-153b-5p	c128079_g2_i1	1064	-114.16	171	-21.02	4314188	22	5291
dre-miR-2196	c124187_g1_i4	1064	-166.3	163	-34.53	7109041	24	1696
dre-miR-2196	c135413_g3_i6	1065	-166.16	173	-32.2	7106081	24	9272
dre-miR-2196	c140123_g3_i5	1067	-149.16	165	-32.72	7099829	24	2647
dre-miR-2196	c140123_g3_i7	1067	-149.16	165	-32.72	7114629	24	4526
dre-miR-1306	c138568_g2_i4	1067	-150.92	163	-27.18	7616582	22	15271
dre-miR-338	c133560_g1_i3	1072	-132.29	161	-22.69	5235986	22	14693
dre-miR-2196	c129465_g1_i4	1072	-151.38	162	-26.79	7100256	24	3625
dre-miR-141-3p	c142009_g1_i3	1073	-124.32	158	-21.07	4016881	22	11856
dre-miR-200a-3p	c142009_g1_i3	1073	-123.01	158	-20.8	4778726	22	11856
dre-miR-2196	c144319_g1_i11	1073	-157.1	172	-29.5	7109664	24	3140
dre-miR-153a-5p	c136489_g2_i2	1074	-116.15	170	-18.28	4365404	23	4241
dre-miR-2196	c140449_g1_i4	1077	-161.62	162	-30.58	7114050	24	7520
dre-miR-2196	c127576_g1_i1	1079	-174.07	170	-29.32	7103470	24	5204
dre-miR-2196	c139617_g4_i3	1082	-174.6	165	-29	7100312	24	6436
dre-miR-181c-5p	c131394_g1_i1	1083	-136.8	167	-28.68	4463500	22	6665
dre-miR-363-5p	c138549_g1_i4	1084	-142.41	168	-27.78	5248560	23	10808
dre-miR-2196	c140205_g1_i4	1084	-151.28	166	-29.97	7100986	24	4058
dre-miR-457a	c125931_g1_i1	1085	-126.81	166	-22.16	5687093	22	4243
dre-miR-2193	c134292_g1_i1	1087	-143.56	166	-23.15	7320708	24	5521
dre-miR-143	c142865_g2_i3	1090	-135.38	171	-26.75	4098035	21	5644
dre-miR-143	c142865_g2_i4	1090	-135.38	171	-26.75	4111833	21	5557
dre-miR-2196	c136489_g2_i2	1097	-169.43	177	-28.62	7108046	24	4241
dre-miR-457a	c125909_g1_i4	1099	-126.76	169	-23.5	5695281	22	1967
dre-miR-2193	c141037_g5_i1	1112	-131.72	173	-23.4	7323801	24	3168
dre-miR-34c-5p	c142831_g3_i1	1139	-139.61	145	-21.87	6462149	23	15923
dre-miR-2196	c141626_g1_i2	1140	-175.48	151	-28.48	7111675	24	13230
dre-miR-139-3p	c137365_g1_i8	1144	-185.37	150	-25.47	6128154	23	5573
dre-miR-184	c141720_g1_i4	1145	-166.82	147	-24.4	4505823	22	8396
dre-miR-184	c141720_g1_i1	1145	-166.82	147	-24.4	4513675	22	8381
dre-miR-139-3p	c142343_g7_i2	1146	-185.06	149	-31.24	6118621	23	3758
dre-miR-139-3p	c142343_g7_i1	1146	-185.06	149	-31.24	6134563	23	4046
dre-miR-2193	c141298_g1_i4	1152	-145.58	151	-22.6	7326063	24	4312
dre-miR-34c-5p	c142009_g1_i3	1153	-138.58	153	-20.61	6454785	23	11856
dre-miR-2185-5p	c141552_g2_i1	1153	-182.65	151	-29.74	6793575	21	8559
dre-miR-2196	c140320_g1_i1	1158	-187.62	154	-26.73	7111398	24	8496
dre-miR-2196	c139613_g1_i7	1161	-182.66	149	-34.39	7097950	24	9239
dre-miR-107b	c143992_g1_i8	1162	-164.39	152	-25.05	7031906	21	17315
dre-miR-107b	c143992_g1_i7	1162	-164.39	152	-25.05	7038182	21	17464
dre-miR-107b	c143992_g1_i10	1162	-164.39	152	-25.05	7038858	21	17180
dre-miR-107b	c143992_g1_i2	1162	-164.39	152	-25.05	7041341	21	17168
dre-miR-138-5p	c141666_g1_i2	1164	-156.22	155	-21.82	3917370	22	6328
dre-miR-2196	c140137_g6_i1	1164	-173.79	152	-29.71	7104408	24	5797
dre-miR-2196	c142763_g5_i2	1165	-173.44	154	-27.26	7106363	24	15868
dre-miR-34c-5p	c141413_g1_i3	1166	-143.3	151	-22.18	6449239	23	7361
dre-miR-2188-5p	c114568_g1_i2	1167	-137.95	163	-20.75	7205005	21	4976
dre-miR-2188-5p	c114568_g1_i3	1167	-137.95	163	-20.75	7220564	21	4855
dre-miR-138-5p	c129117_g1_i4	1168	-145.87	154	-20.55	3901482	22	6608
dre-miR-138-5p	c129117_g1_i5	1168	-145.87	154	-20.55	3902308	22	7317
dre-miR-363-5p	c134016_g1_i2	1168	-160.81	152	-24.8	5255434	23	8624
dre-miR-2196	c138216_g1_i1	1168	-188.87	156	-32.6	7100873	24	9641
dre-miR-139-3p	c137464_g1_i2	1169	-177.92	159	-27.71	6123611	23	2243
dre-miR-2193	c141149_g1_i6	1169	-132.67	155	-18.36	7318200	24	8169
dre-miR-139-3p	c140167_g1_i3	1170	-213.45	158	-35.29	6124160	23	12892
dre-miR-457b-5p	c105358_g1_i2	1171	-127.32	155	-18.82	5706926	22	6022
dre-miR-456	c143338_g2_i3	1173	-145.83	155	-22.42	5662454	22	14437
dre-miR-2196	c134425_g3_i3	1173	-156.69	161	-24.14	7107156	24	5862
dre-miR-143	c135029_g1_i3	1174	-133.73	166	-19.01	4109027	21	9860
dre-miR-2196	c91908_g1_i1	1174	-177.79	159	-29.28	7114348	24	6857
dre-miR-2196	c137088_g1_i1	1175	-168.67	154	-23.97	7099778	24	4450
dre-miR-2196	c137088_g1_i3	1175	-168.67	154	-23.97	7111799	24	4356
dre-miR-2196	c137088_g1_i2	1175	-168.67	154	-23.97	7116664	24	4841
dre-miR-153b-5p	c140738_g1_i2	1176	-140.35	159	-22.61	4315547	22	11070
dre-miR-139-3p	c143674_g1_i4	1177	-206.26	158	-30.62	6123550	23	10637
dre-miR-139-3p	c138966_g2_i3	1177	-210.73	155	-33.33	6137648	23	11737
dre-miR-1388-3p	c143674_g1_i5	1177	-145.45	158	-24.63	6880697	22	19057
dre-miR-1788-3p	c142586_g4_i1	1177	-152.9	158	-22.1	6926130	21	12109
dre-miR-2196	c138591_g1_i2	1178	-183.76	152	-28.61	7098241	24	8154
dre-miR-2196	c140915_g11_i3	1179	-170.93	157	-26.96	7108607	24	5701
dre-miR-153a-5p	c144003_g4_i1	1181	-123.81	163	-19.3	4366258	23	15604
dre-miR-139-3p	c9179_g1_i1	1182	-191.41	159	-33.14	6121276	23	1749
dre-miR-2196	c134202_g1_i3	1182	-163.86	167	-24.6	7114559	24	4294
dre-miR-455-3p	c125928_g1_i1	1183	-135.14	159	-18.4	5414802	23	8877
dre-miR-725-3p	c143338_g2_i3	1183	-137.38	161	-19.83	6315464	22	14437
dre-miR-139-3p	c140585_g1_i1	1184	-210.16	164	-32.05	6123664	23	12900
dre-miR-139-3p	c108321_g1_i2	1184	-202.5	163	-28.24	6130179	23	4328
dre-miR-139-3p	c132275_g1_i1	1184	-179.77	157	-26.27	6131630	23	5387
dre-miR-139-3p	c140585_g1_i3	1184	-210.16	164	-32.05	6135454	23	12911
dre-miR-181c-5p	c138448_g1_i1	1186	-163.76	160	-26	4478830	22	8195
dre-miR-2196	c140044_g3_i3	1187	-167.7	172	-30.03	7096578	24	13083
dre-miR-2196	c127673_g1_i5	1187	-187.37	157	-28.27	7112575	24	2810
dre-miR-2196	c141094_g1_i3	1188	-181.02	163	-29.83	7103201	24	4236
dre-miR-152	c143674_g1_i5	1189	-150.87	158	-25.55	4290424	22	19057
dre-miR-152	c143674_g1_i2	1189	-150.87	158	-25.55	4307161	22	19154
dre-miR-139-3p	c140987_g1_i6	1189	-206.25	161	-30.68	6134894	23	15902
dre-miR-139-3p	c140987_g1_i1	1189	-206.25	161	-30.68	6135150	23	15839
dre-miR-34c-5p	c139774_g2_i8	1189	-150.46	157	-21.02	6462080	23	6154
dre-miR-138-5p	c131733_g1_i3	1190	-167.55	166	-24.76	3904711	22	5236
dre-miR-181c-5p	c128636_g1_i3	1193	-160.41	164	-26.91	4482388	22	5465
dre-miR-216b	c142378_g1_i6	1193	-143.56	167	-21.56	5030324	22	14580
dre-miR-216b	c142378_g1_i7	1193	-143.56	167	-21.56	5037825	22	14511
dre-miR-139-3p	c137875_g4_i3	1194	-203.09	161	-33.65	6126173	23	7634
dre-miR-139-3p	c137875_g4_i1	1194	-203.09	161	-33.65	6133102	23	7649
dre-miR-2196	c140585_g1_i3	1195	-174.13	170	-28.73	7114969	24	12911
dre-miR-107b	c141455_g1_i7	1196	-149.28	157	-21.95	7049846	21	7042
dre-miR-2196	c134479_g1_i5	1196	-179.33	172	-28.09	7108042	24	3582
dre-miR-139-3p	c129810_g1_i5	1198	-195.83	165	-32.32	6117654	23	7008
dre-miR-725-3p	c133560_g1_i3	1198	-137.64	159	-19.97	6324336	22	14693
dre-miR-1306	c141411_g1_i6	1198	-203.62	155	-34.39	7601351	22	3721
dre-miR-2196	c143067_g1_i2	1202	-190.52	165	-27.95	7110793	24	8902
dre-miR-727-3p	c143674_g1_i5	1203	-156.42	170	-28.18	6380056	22	19057
dre-miR-727-3p	c143674_g1_i2	1203	-156.42	170	-28.18	6396793	22	19154
dre-miR-730	c140044_g3_i3	1203	-160.69	162	-23.01	6487102	23	13083
dre-miR-2196	c140361_g1_i2	1203	-172.86	157	-27.72	7100851	24	6542
dre-miR-2196	c134000_g2_i8	1204	-166.78	158	-28.26	7116127	24	3645
dre-miR-7149-3p	c134867_g1_i1	1206	-141.54	159	-19.38	7586787	23	11296
dre-miR-457b-5p	c121281_g1_i1	1210	-128.25	161	-18.47	5702989	22	4055
dre-miR-2196	c131028_g1_i7	1210	-168.17	159	-23.63	7097014	24	3149
dre-miR-2196	c131028_g1_i2	1210	-168.17	159	-23.63	7112305	24	3098
dre-miR-2196	c131028_g1_i6	1210	-168.17	159	-23.63	7112714	24	2997
dre-miR-457a	c138759_g1_i5	1211	-138.76	160	-21.93	5682035	22	7995
dre-miR-2196	c133328_g1_i2	1211	-161.91	171	-25.31	7112977	24	4742
dre-miR-138-5p	c138749_g1_i10	1212	-174.31	167	-25.66	3899123	22	3071
dre-miR-138-5p	c138749_g1_i6	1212	-174.31	167	-25.66	3900878	22	3086
dre-miR-138-5p	c138749_g1_i9	1212	-174.31	167	-25.66	3912387	22	3029
dre-miR-181c-5p	c140137_g6_i1	1217	-154.55	160	-27.25	4470601	22	5797
dre-miR-216b	c144003_g4_i1	1218	-151.3	164	-22.9	5041035	22	15604
dre-miR-153a-5p	c132733_g1_i2	1219	-152.66	181	-26.81	4365489	23	7259
dre-miR-138-5p	c136306_g1_i2	1224	-144.56	161	-21.96	3900662	22	2071
dre-miR-456	c142398_g3_i5	1224	-169.19	165	-28.4	5663923	22	10354
dre-miR-456	c142398_g3_i10	1224	-169.19	165	-28.4	5675463	22	10366
dre-miR-456	c142398_g3_i8	1224	-169.19	165	-28.4	5680699	22	10464
dre-miR-139-3p	c140044_g3_i3	1224	-200.16	167	-29.85	6117063	23	13083
dre-miR-139-3p	c140044_g3_i1	1224	-200.16	167	-29.85	6137778	23	12278
dre-miR-2196	c101921_g1_i1	1230	-185.39	161	-35.84	7111293	24	8878
dre-miR-146b	c131607_g1_i1	1231	-151.21	163	-22.29	4234008	22	8280
dre-miR-2196	c138782_g1_i1	1232	-176.83	169	-27.29	7100661	24	7139
dre-miR-133a-3p	c114568_g1_i3	1289	-171.55	151	-24.67	3716077	22	4855
dre-miR-133b-3p	c114568_g1_i2	1289	-167.03	151	-24.8	3765819	22	4976
dre-miR-133b-3p	c114568_g1_i3	1289	-167.03	151	-24.8	3781378	22	4855
dre-miR-133c-3p	c114568_g1_i2	1295	-165.96	151	-22.68	3809353	22	4976
dre-miR-133c-3p	c114568_g1_i3	1295	-165.96	151	-22.68	3824912	22	4855
dre-miR-457b-5p	c141413_g1_i3	1298	-154.04	150	-21.35	5709161	22	7361
dre-miR-146b	c143338_g2_i3	1299	-151.52	152	-21.68	4225832	22	14437
dre-miR-15c	c126471_g3_i1	1300	-183.32	155	-23.85	6578557	21	7351
dre-miR-2196	c142743_g1_i1	1305	-174.38	155	-23.33	7101259	24	8467
dre-miR-2196	c126335_g1_i1	1314	-203.23	154	-28.82	7103886	24	7951
dre-miR-2196	c126335_g1_i3	1314	-203.23	154	-28.82	7109852	24	7866
dre-miR-2196	c126335_g1_i4	1314	-203.23	154	-28.82	7113462	24	7848
dre-miR-456	c142009_g1_i3	1316	-183.06	163	-24.07	5671173	22	11856
dre-miR-2196	c108749_g1_i2	1316	-199.61	160	-27.2	7112017	24	6237
dre-miR-139-3p	c132944_g2_i2	1318	-248.29	156	-31.9	6122494	23	7002
dre-miR-1306	c120045_g1_i2	1318	-212.6	168	-31.1	7602641	22	3042
dre-miR-2196	c142147_g1_i8	1319	-194.87	153	-29.92	7109977	24	7334
dre-miR-338	c141035_g1_i2	1320	-176.79	153	-25.2	5228594	22	15922
dre-miR-457a	c144161_g1_i7	1321	-141.18	159	-18.17	5702096	22	14716
dre-miR-34b	c141035_g1_i2	1322	-194.19	160	-25.45	6033973	23	15922
dre-miR-145-5p	c138785_g1_i2	1323	-162.23	156	-24.84	4175543	22	11668
dre-miR-459-3p	c142180_g2_i2	1323	-214.07	159	-27.88	5824114	22	14252
dre-miR-153a-5p	c144143_g2_i2	1327	-153.18	165	-21.51	4355425	23	8745
dre-miR-15c	c139617_g4_i3	1327	-160.86	158	-21.78	6577904	21	6436
dre-miR-2196	c132376_g1_i4	1327	-202.78	163	-25.61	7105338	24	4903
dre-miR-153b-5p	c105929_g1_i2	1328	-161.42	157	-22.83	4318674	22	10380
dre-miR-2196	c137365_g1_i8	1329	-202.82	155	-29.13	7107669	24	5573
dre-miR-2196	c139005_g1_i3	1330	-209.96	162	-32.66	7116536	24	6504
dre-miR-139-3p	c143604_g1_i4	1331	-225.61	154	-31.72	6131702	23	5955
dre-miR-139-3p	c131067_g1_i1	1334	-211.72	161	-26.73	6123697	23	7046
dre-miR-7147	c144268_g1_i3	1334	-142.64	161	-17.45	7507705	21	4358
dre-miR-730	c141035_g1_i2	1335	-171.64	162	-27.06	6491080	23	15922
dre-miR-107b	c143674_g1_i5	1335	-184.07	175	-26.04	7033066	21	19057
dre-miR-107b	c143674_g1_i2	1335	-184.07	175	-26.04	7049803	21	19154
dre-miR-1306	c80302_g1_i1	1335	-219.02	158	-32.57	7611912	22	2224
dre-miR-2196	c126164_g1_i1	1337	-196.26	163	-29.92	7112127	24	7901
dre-miR-430a-4-5p	c140585_g1_i1	1340	-179.68	164	-26.89	5448887	21	12900
dre-miR-430a-4-5p	c140585_g1_i3	1340	-179.68	164	-26.89	5460677	21	12911
dre-miR-430a-11-5p	c140585_g1_i1	1340	-179.68	164	-26.89	5470654	21	12900
dre-miR-430a-11-5p	c140585_g1_i3	1340	-179.68	164	-26.89	5482444	21	12911
dre-miR-430a-12-5p	c140585_g1_i1	1340	-179.68	164	-26.89	5492421	21	12900
dre-miR-430a-12-5p	c140585_g1_i3	1340	-179.68	164	-26.89	5504211	21	12911
dre-miR-430a-13-5p	c140585_g1_i1	1340	-179.68	164	-26.89	5514188	21	12900
dre-miR-430a-13-5p	c140585_g1_i3	1340	-179.68	164	-26.89	5525978	21	12911
dre-miR-430a-14-5p	c140585_g1_i1	1340	-179.68	164	-26.89	5535955	21	12900
dre-miR-430a-14-5p	c140585_g1_i3	1340	-179.68	164	-26.89	5547745	21	12911
dre-miR-430a-15-5p	c140585_g1_i1	1340	-179.68	164	-26.89	5557722	21	12900
dre-miR-430a-15-5p	c140585_g1_i3	1340	-179.68	164	-26.89	5569512	21	12911
dre-miR-430a-16-5p	c140585_g1_i1	1340	-179.68	164	-26.89	5579489	21	12900
dre-miR-430a-16-5p	c140585_g1_i3	1340	-179.68	164	-26.89	5591279	21	12911
dre-miR-430a-17-5p	c140585_g1_i1	1340	-179.68	164	-26.89	5601256	21	12900
dre-miR-430a-17-5p	c140585_g1_i3	1340	-179.68	164	-26.89	5613046	21	12911
dre-miR-430i-5p	c140585_g1_i1	1340	-179.68	164	-26.89	5623023	21	12900
dre-miR-430i-5p	c140585_g1_i3	1340	-179.68	164	-26.89	5634813	21	12911
dre-miR-2196	c138329_g1_i4	1340	-201.99	157	-26.54	7113720	24	14524
dre-miR-457b-5p	c140292_g1_i2	1342	-156.72	164	-22.5	5713059	22	7254
dre-miR-2196	c143376_g1_i9	1348	-176.69	162	-24.46	7112667	24	8878
dre-miR-2196	c140361_g1_i1	1350	-196.1	157	-27.72	7102265	24	8064
dre-miR-2196	c140361_g1_i3	1350	-196.1	157	-27.72	7114971	24	7847
dre-miR-730	c142786_g1_i3	1352	-178.04	163	-24.56	6494246	23	10709
dre-miR-730	c142786_g1_i4	1352	-178.04	163	-24.56	6498961	23	10722
dre-miR-2193	c142631_g1_i1	1352	-144.72	177	-18.5	7332160	24	11453
dre-miR-153b-5p	c133808_g3_i1	1354	-154.81	168	-21.17	4317928	22	9323
dre-miR-457a	c138759_g1_i2	1354	-158.84	160	-21.93	5699512	22	8229
dre-miR-153a-5p	c138785_g1_i2	1355	-163.61	169	-23.06	4371446	23	11668
dre-miR-457a	c130465_g1_i1	1355	-144	162	-18.37	5686125	22	4618
dre-miR-2196	c136961_g1_i1	1356	-187.3	161	-25.1	7115843	24	7357
dre-miR-457a	c138260_g3_i6	1359	-167.74	159	-26.41	5686106	22	10308
dre-miR-457a	c138260_g3_i7	1359	-167.74	159	-26.41	5701691	22	10216
dre-miR-2196	c136633_g1_i2	1362	-214.16	165	-31.41	7097568	24	2889
dre-miR-1306	c130741_g2_i3	1392	-250.81	172	-37.45	7612090	22	2776
dre-miR-139-3p	c140123_g1_i2	1400	-242.12	177	-34.78	6137389	23	4513
dre-miR-139-3p	c132484_g1_i4	1428	-232.54	149	-27.03	6135549	23	7753
dre-miR-139-3p	c132484_g1_i6	1438	-232.08	150	-26.57	6120506	23	6682
dre-miR-34b	c139413_g1_i3	1442	-195.78	150	-23.81	6050684	23	9528
dre-miR-2196	c138419_g3_i2	1448	-205.69	153	-25.85	7108011	24	8521
dre-miR-139-3p	c140017_g1_i6	1451	-262.58	158	-31.77	6121415	23	6441
dre-miR-2196	c141035_g1_i2	1460	-229.56	153	-27.83	7100556	24	15922
dre-miR-1388-3p	c141035_g1_i2	1466	-213.87	154	-25.95	6882886	22	15922
dre-miR-2196	c134876_g1_i3	1468	-222.98	167	-26.33	7101092	24	10335
dre-miR-153b-5p	c144143_g2_i2	1472	-157.96	155	-17.39	4311891	22	8745
dre-miR-139-3p	c142763_g5_i2	1472	-249.06	157	-31.92	6126848	23	15868
dre-miR-730	c128623_g1_i2	1475	-197.72	167	-27.59	6503921	23	8193
dre-miR-139-3p	c105358_g1_i2	1476	-233.15	157	-28.07	6120499	23	6022
dre-miR-2196	c140738_g1_i2	1476	-218.46	164	-25.44	7101723	24	11070
dre-miR-181c-5p	c128636_g1_i5	1485	-199.84	164	-26.91	4473083	22	5720
dre-miR-139-3p	c142350_g1_i1	1485	-259.2	156	-34.58	6128483	23	7999
dre-miR-139-3p	c142350_g1_i8	1485	-259.2	156	-34.58	6136259	23	8044
dre-miR-2196	c136919_g1_i2	1485	-237.87	162	-30.03	7099684	24	7336
dre-miR-139-3p	c139201_g1_i4	1487	-255.05	161	-29.17	6128924	23	10859
dre-miR-139-3p	c139201_g1_i3	1487	-255.05	161	-29.17	6136881	23	9871
dre-miR-146a	c131607_g1_i1	1494	-177.97	161	-22.9	4212241	23	8280
dre-miR-725-3p	c144161_g1_i7	1495	-179.17	160	-24.91	6333339	22	14716
dre-miR-133a-3p	c142180_g2_i2	1500	-201.3	163	-23.27	3712715	22	14252
dre-miR-133b-3p	c142180_g2_i2	1500	-199.2	163	-23.27	3778016	22	14252
dre-miR-133c-3p	c142180_g2_i2	1504	-197.05	171	-22.9	3821550	22	14252
dre-miR-2196	c105929_g1_i2	1508	-220.01	158	-35.26	7104850	24	10380
dre-miR-2196	c138377_g1_i2	1510	-218.3	161	-25.45	7100383	24	5469
dre-miR-2196	c138377_g1_i3	1510	-218.3	161	-25.45	7104019	24	5655
dre-miR-2196	c138377_g1_i4	1510	-218.3	161	-25.45	7110109	24	5782
dre-miR-2196	c138377_g1_i1	1510	-218.3	161	-25.45	7116061	24	5640
dre-miR-2196	c140431_g1_i9	1514	-215.75	164	-24.91	7096330	24	3340
dre-miR-2196	c133808_g1_i1	1515	-220.18	167	-29.45	7102600	24	4825
dre-miR-2196	c129117_g1_i4	1523	-240.58	174	-28.8	7101231	24	6608
dre-miR-2196	c144151_g5_i1	1545	-201.53	174	-27.47	7111403	24	2313
dre-miR-457b-5p	c130465_g1_i1	1551	-171.18	166	-20.13	5707892	22	4618
dre-miR-457b-5p	c141413_g1_i1	1583	-184.79	150	-21.35	5723473	22	6575
dre-miR-456	c143674_g1_i5	1607	-215.91	162	-28.21	5661745	22	19057
dre-miR-456	c143674_g1_i2	1607	-215.91	162	-28.21	5678482	22	19154
dre-miR-133b-3p	c117956_g1_i3	1610	-205.82	160	-23.33	3768634	22	2294
dre-miR-139-3p	c136968_g5_i1	1616	-278.99	157	-30.61	6133257	23	8216
dre-miR-457a	c142831_g3_i1	1622	-188.76	155	-19.66	5700304	22	15923
dre-miR-139-3p	c140969_g1_i3	1628	-269.26	165	-29.69	6117348	23	12599
dre-miR-139-3p	c140969_g1_i4	1628	-269.26	165	-29.69	6119339	23	12641
dre-miR-139-3p	c140969_g1_i1	1628	-269.26	165	-29.69	6129861	23	12425
dre-miR-139-3p	c141687_g1_i3	1631	-262.44	157	-27.85	6120749	23	6582
dre-miR-139-3p	c141687_g1_i1	1631	-262.44	157	-27.85	6130483	23	6630
dre-miR-457b-5p	c141575_g2_i3	1633	-175.36	162	-18.4	5706818	22	10024
dre-miR-133c-3p	c117956_g1_i3	1642	-204.7	168	-23.26	3812168	22	2294
dre-miR-139-3p	c141270_g4_i4	1644	-265.86	167	-31.94	6125362	23	5098
dre-miR-375	c138073_g2_i3	1663	-220.68	163	-24.21	5312310	22	6615
dre-miR-2196	c140899_g1_i6	1665	-258.6	163	-29.41	7102593	24	5560
dre-miR-2196	c129117_g1_i5	1672	-250.41	174	-28.8	7102057	24	7317
dre-miR-2196	c127585_g2_i4	1672	-248.79	165	-27.22	7105336	24	9941
dre-miR-2196	c138785_g1_i2	1672	-237.27	164	-26.21	7114088	24	11668
dre-miR-139-3p	c142808_g2_i8	1732	-297.3	152	-31	6121268	23	13201
dre-miR-456	c143367_g2_i2	1757	-255.86	161	-24.72	5680993	22	14485
dre-miR-2196	c143992_g2_i2	1771	-254.69	157	-30.57	7100445	24	9689
dre-miR-2196	c140969_g1_i3	1774	-245.75	162	-27.85	7096863	24	12599
dre-miR-2196	c140969_g1_i4	1774	-245.75	162	-27.85	7098854	24	12641
dre-miR-2196	c140969_g1_i1	1774	-245.75	162	-27.85	7109376	24	12425
dre-miR-2196	c142875_g1_i2	1777	-258.08	167	-28.94	7104846	24	11568
dre-miR-138-5p	c134239_g1_i5	1790	-241.13	160	-25.35	3898971	22	5867
dre-miR-2196	c144143_g2_i2	1790	-238.24	166	-30.33	7098067	24	8745
dre-miR-145-5p	c133560_g1_i3	1799	-216.37	163	-27.57	4169403	22	14693
dre-miR-457a	c141575_g2_i3	1824	-203.47	167	-21.98	5685051	22	10024
dre-miR-457a	c121281_g1_i1	1838	-201.9	162	-19.85	5681222	22	4055
dre-miR-2196	c140069_g1_i3	1859	-293.18	172	-32.61	7096867	24	9655
dre-miR-143	c131607_g1_i1	1902	-219.53	170	-24.39	4103406	21	8280
dre-miR-139-3p	c136968_g5_i3	1906	-336.97	157	-30.9	6127309	23	10003
dre-miR-2196	c142222_g5_i5	1909	-266.22	152	-24.15	7105276	24	10545
dre-miR-2196	c142222_g5_i6	1909	-266.22	152	-24.15	7107586	24	10579
dre-miR-2196	c132798_g1_i4	1920	-279.52	162	-28.83	7102927	24	2659
dre-miR-145-5p	c143992_g1_i8	1922	-254.8	157	-26.1	4158662	22	17315
dre-miR-145-5p	c143992_g1_i7	1922	-254.8	157	-26.1	4164938	22	17464
dre-miR-145-5p	c143992_g1_i10	1922	-254.8	157	-26.1	4165614	22	17180
dre-miR-145-5p	c143992_g1_i2	1922	-254.8	157	-26.1	4168097	22	17168
dre-miR-139-3p	c130431_g2_i2	1923	-334.96	155	-33.12	6119525	23	6261
dre-miR-139-3p	c130431_g2_i1	1923	-334.96	155	-33.12	6135295	23	6673
dre-miR-2196	c142736_g1_i3	1929	-293.44	168	-31.06	7110029	24	7627
dre-miR-139-3p	c129018_g1_i2	2022	-375.08	152	-31.51	6116631	23	13337
dre-miR-457a	c141413_g1_i1	2060	-231.72	159	-20.31	5701706	22	6575
dre-miR-139-3p	c143674_g1_i2	2061	-351.75	158	-30.62	6135589	23	19154
dre-miR-457a	c141413_g1_i3	2078	-231.77	160	-20.31	5687394	22	7361
dre-miR-2196	c140431_g1_i2	2094	-299.94	163	-25.07	7104485	24	5375
dre-miR-139-3p	c134876_g1_i3	2183	-370.65	155	-29.75	6121577	23	10335
dre-miR-139-3p	c143674_g1_i5	2203	-379.87	158	-30.62	6118852	23	19057
dre-miR-2188-5p	c137481_g4_i7	2355	-280.4	163	-20.9	7226206	21	5449
dre-miR-2196	c133560_g1_i3	2515	-377.53	161	-27.66	7107948	24	14693
dre-miR-2188-5p	c137481_g4_i4	2655	-312.34	155	-23.15	7221483	21	5621
dre-miR-2196	c143992_g1_i8	2827	-412.86	165	-28.88	7097207	24	17315
dre-miR-2196	c143992_g1_i10	2827	-412.86	165	-28.88	7104159	24	17180
dre-miR-2196	c143992_g1_i2	2827	-412.86	165	-28.88	7106642	24	17168
dre-miR-2196	c143992_g1_i7	2972	-431.84	165	-28.88	7103483	24	17464
ccr-miR-183	c136014_g1_i1	1000	-139.36	147	-21.98	1180312	23	15541
ccr-miR-16a	c142865_g2_i3	1004	-130.8	149	-21.56	963587	22	5644
ccr-miR-16a	c142865_g2_i4	1004	-130.8	149	-21.56	977385	22	5557
ccr-miR-16b	c142865_g2_i3	1004	-121.38	149	-21.56	985354	22	5644
ccr-miR-205	c141035_g1_i2	1004	-141.53	149	-28.45	1615272	22	15922
ccr-miR-20a-3p	c139119_g1_i2	1004	-143.37	150	-27.54	1683938	23	6472
ccr-miR-34	c142009_g1_i3	1004	-131.89	155	-23.09	2253754	22	11856
ccr-miR-16a	c139750_g1_i2	1005	-109.76	150	-19.55	957790	22	9000
ccr-miR-16a	c139750_g1_i1	1005	-109.76	150	-19.55	964512	22	9018
ccr-miR-16a	c139750_g1_i4	1005	-109.76	150	-19.55	967078	22	8985
ccr-miR-182-5p	c140987_g1_i6	1005	-122.46	147	-21.43	1150251	23	15902
ccr-miR-182-5p	c140987_g1_i1	1005	-122.46	147	-21.43	1150507	23	15839
ccr-miR-17-3p	c138591_g1_i2	1006	-132.35	146	-23.73	1047015	23	8154
ccr-miR-17-3p	c104299_g1_i1	1006	-126.34	153	-23.59	1053925	23	2812
ccr-miR-16b	c138346_g2_i13	1007	-119.11	152	-19.42	987796	22	9396
ccr-miR-16b	c138346_g2_i2	1007	-119.11	152	-19.42	998934	22	9555
ccr-miR-7132	c130137_g2_i6	1008	-118.94	152	-20.13	3126995	21	3999
ccr-miR-138	c139378_g3_i1	1009	-152.47	157	-28.05	634220	21	5248
ccr-miR-16c	c140231_g1_i1	1010	-110.6	159	-17.38	1003369	21	5692
ccr-miR-20a-3p	c141626_g1_i2	1012	-123.56	155	-20.25	1691692	23	13230
ccr-miR-24	c140987_g1_i6	1012	-140.63	151	-26.96	1977397	22	15902
ccr-miR-24	c140987_g1_i1	1012	-140.63	151	-26.96	1977653	22	15839
ccr-miR-139	c143936_g1_i1	1013	-131.53	148	-23.52	663140	23	9110
ccr-miR-15a	c141035_g1_i2	1013	-122.5	149	-20.7	853427	21	15922
ccr-miR-16a	c136850_g3_i3	1014	-113.25	147	-18.77	961813	22	4919
ccr-miR-16b	c136850_g3_i3	1014	-116.72	147	-19	983580	22	4919
ccr-miR-17-3p	c138329_g1_i4	1014	-136.52	150	-26.23	1062494	23	14524
ccr-miR-194	c144161_g1_i7	1014	-135.72	149	-22.43	1392230	22	14716
ccr-miR-7a	c141283_g1_i6	1014	-126.12	153	-20.8	2848214	24	7113
ccr-miR-15a	c133681_g1_i1	1015	-119.78	149	-22.95	862557	21	5607
ccr-miR-17-3p	c137088_g1_i1	1015	-125.62	157	-21.3	1048552	23	4450
ccr-miR-17-3p	c137088_g1_i3	1015	-125.62	157	-21.3	1060573	23	4356
ccr-miR-17-3p	c137088_g1_i2	1015	-125.62	157	-21.3	1065438	23	4841
ccr-miR-20a-3p	c142786_g1_i3	1015	-114.04	150	-20.88	1683739	23	10709
ccr-miR-20a-3p	c142786_g1_i4	1015	-114.04	150	-20.88	1688454	23	10722
ccr-miR-214	c142479_g3_i2	1015	-140.27	153	-21.64	1750527	19	9803
ccr-miR-489	c141977_g6_i11	1016	-130.91	151	-23.12	2592876	22	6370
ccr-let-7i	c141035_g1_i2	1018	-146.84	152	-28.21	69815	21	15922
ccr-miR-15a	c120137_g1_i1	1019	-123.19	160	-19.39	856937	21	4101
ccr-miR-15b	c143596_g3_i11	1019	-118.15	153	-20.56	949339	21	6156
ccr-miR-16c	c138759_g1_i5	1019	-117.99	150	-20.79	1002130	21	7995
ccr-miR-16c	c138759_g1_i2	1019	-117.99	150	-20.79	1019607	21	8229
ccr-miR-17-3p	c137957_g2_i1	1019	-142.92	159	-25.64	1047591	23	10288
ccr-miR-183	c142378_g1_i6	1019	-121.23	157	-21.13	1177565	23	14580
ccr-miR-183	c142378_g1_i7	1019	-121.23	157	-21.13	1185066	23	14511
ccr-miR-183	c142378_g1_i3	1019	-121.23	157	-21.13	1186612	23	14655
ccr-miR-20a-3p	c138368_g1_i4	1019	-137.95	158	-24.32	1680839	23	8589
ccr-miR-24	c140069_g1_i3	1019	-141.03	155	-23.42	1959855	22	9655
ccr-miR-338	c140976_g1_i3	1019	-124.09	153	-23.04	2228121	22	7365
ccr-miR-34	c141035_g1_i2	1019	-147.74	155	-24.78	2246515	22	15922
ccr-miR-489	c142234_g4_i4	1019	-134.19	157	-21.59	2610204	22	5738
ccr-miR-7a	c130488_g1_i4	1019	-127.18	152	-21.79	2829801	24	4947
ccr-miR-7a	c130488_g1_i7	1019	-127.18	152	-21.79	2834577	24	4773
ccr-miR-7a	c123195_g2_i2	1019	-110.7	154	-18.48	2837836	24	5342
ccr-miR-7a	c130488_g1_i9	1019	-127.18	152	-21.79	2841142	24	4893
ccr-miR-7a	c130488_g1_i5	1019	-127.18	152	-21.79	2846399	24	5067
ccr-miR-2192	c143674_g1_i5	1019	-130.57	154	-24.2	3027938	21	19057
ccr-miR-2192	c143674_g1_i2	1019	-130.57	154	-24.2	3044675	21	19154
ccr-miR-16b	c136014_g1_i1	1020	-119.05	156	-22.86	984409	22	15541
ccr-miR-138	c141666_g1_i2	1021	-128.59	155	-21.25	652320	21	6328
ccr-miR-205	c143416_g1_i1	1021	-151.42	158	-26.66	1614690	22	9981
ccr-miR-457b	c135029_g1_i3	1021	-127.32	157	-21.58	2498269	21	9860
ccr-miR-459-3p	c142180_g2_i2	1021	-162.25	154	-26.09	2537297	21	14252
ccr-miR-132a	c140374_g1_i2	1022	-139.1	158	-23.09	536149	22	11503
ccr-miR-132a	c140374_g1_i5	1022	-139.1	158	-23.09	541271	22	12507
ccr-miR-16a	c137481_g4_i4	1022	-126.64	150	-21.99	974354	22	5621
ccr-miR-16b	c137481_g4_i4	1022	-129.62	150	-22.22	996121	22	5621
ccr-miR-16b	c144161_g1_i7	1022	-116.54	154	-19.38	1000424	22	14716
ccr-miR-214	c142219_g2_i6	1022	-137.55	152	-26.53	1758952	19	9085
ccr-miR-24	c133547_g3_i2	1022	-142.73	158	-24.52	1961272	22	8226
ccr-miR-489	c134122_g2_i3	1022	-118.49	156	-21.71	2592000	22	4184
ccr-miR-138	c139251_g1_i7	1023	-143.16	156	-23.69	647377	21	4823
ccr-miR-15a	c142865_g2_i3	1023	-121.2	155	-19.26	854752	21	5644
ccr-miR-205	c132831_g1_i1	1023	-145.61	163	-27.46	1616382	22	4509
ccr-miR-205	c132831_g1_i2	1023	-145.61	163	-27.46	1623998	22	4653
ccr-miR-20a-3p	c144566_g1_i7	1023	-138.72	151	-27.4	1691806	23	7877
ccr-miR-20a-3p	c144566_g1_i1	1023	-138.72	151	-27.4	1696595	23	7837
ccr-miR-7a	c139484_g12_i3	1023	-121.91	160	-21.86	2840784	24	10146
ccr-miR-7132	c144660_g1_i3	1023	-125.14	154	-19.52	3132747	21	7417
ccr-miR-16b	c132848_g1_i3	1024	-120.85	150	-23.37	991712	22	6400
ccr-miR-34	c141413_g1_i3	1024	-148.55	162	-31.84	2248208	22	7361
ccr-miR-34	c141413_g1_i1	1024	-148.55	162	-31.84	2262520	22	6575
ccr-miR-7132	c140176_g7_i11	1024	-132.06	158	-21.58	3118137	21	6260
ccr-miR-7132	c140176_g7_i6	1024	-132.06	158	-21.58	3133832	21	6194
ccr-miR-138	c140201_g2_i10	1025	-151.8	155	-25.79	633794	21	8581
ccr-miR-138	c140201_g2_i9	1025	-151.8	155	-25.79	649107	21	8617
ccr-miR-139	c138368_g1_i4	1025	-131.72	152	-25.05	657790	23	8589
ccr-miR-139	c141626_g1_i5	1025	-131.12	150	-25.41	662372	23	11651
ccr-miR-16c	c138260_g3_i6	1025	-111.07	154	-19.22	1006201	21	10308
ccr-miR-16c	c138260_g3_i7	1025	-111.07	154	-19.22	1021786	21	10216
ccr-miR-17-3p	c140626_g2_i2	1025	-155.32	157	-25.79	1045288	23	9032
ccr-miR-17-3p	c140626_g2_i3	1025	-155.32	157	-25.79	1066505	23	8902
ccr-miR-27d	c132034_g1_i1	1025	-130.8	157	-22.7	2090075	21	5919
ccr-miR-7132	c126471_g3_i1	1025	-138.22	158	-24.05	3117604	21	7351
ccr-miR-16b	c115810_g1_i3	1026	-120.07	151	-20.44	1000163	22	9257
ccr-miR-17-3p	c138689_g1_i1	1026	-139.17	168	-26.28	1064625	23	5934
ccr-miR-24	c142479_g3_i2	1026	-148.87	155	-26.45	1968197	22	9803
ccr-miR-489	c138399_g4_i11	1026	-127.17	155	-23.48	2593416	22	3882
ccr-miR-107	c141035_g1_i2	1027	-123.79	156	-21.94	222184	22	15922
ccr-miR-16a	c107740_g1_i1	1027	-132.64	153	-25.57	960349	22	5569
ccr-miR-16b	c107740_g1_i1	1027	-126.41	153	-24.78	982116	22	5569
ccr-miR-20a-3p	c140472_g6_i21	1027	-136.85	161	-22.59	1679562	23	8706
ccr-miR-20a-3p	c142875_g1_i2	1027	-131.86	158	-24.22	1684863	23	11568
ccr-miR-214	c140069_g1_i3	1027	-116.99	152	-19.48	1742185	19	9655
ccr-miR-214	c135191_g1_i4	1027	-118.79	155	-19.18	1742900	19	11650
ccr-miR-214	c135191_g1_i1	1027	-118.79	155	-19.18	1746750	19	11665
ccr-miR-730	c140044_g3_i1	1027	-133.63	158	-22.72	2807427	22	12278
ccr-miR-15b	c140167_g1_i3	1028	-114.32	155	-19.9	943614	21	12892
ccr-miR-214	c143674_g1_i5	1028	-130.72	159	-25.02	1743685	19	19057
ccr-miR-214	c143674_g1_i2	1028	-130.72	159	-25.02	1760422	19	19154
ccr-miR-7132	c142586_g4_i1	1028	-125.37	157	-23	3116905	21	12109
ccr-miR-103	c141035_g1_i2	1029	-123.96	156	-21.62	200417	23	15922
ccr-miR-138	c141254_g1_i9	1029	-141.48	163	-26.49	639473	21	10087
ccr-miR-15b	c120137_g1_i1	1029	-120.15	152	-21.33	944005	21	4101
ccr-miR-16c	c136014_g1_i1	1029	-110	156	-18.05	1006176	21	15541
ccr-miR-17-3p	c140291_g1_i2	1029	-138.88	157	-25.72	1056591	23	5147
ccr-miR-199-5p	c144161_g1_i7	1029	-146.71	160	-32.81	1457531	23	14716
ccr-miR-132b	c138334_g1_i3	1029	-136.03	159	-22.91	3075210	22	8548
ccr-miR-15a	c136014_g1_i1	1030	-114.44	153	-20.39	853807	21	15541
ccr-miR-16c	c131498_g1_i2	1030	-106.79	149	-16.34	1013813	21	12635
ccr-miR-16c	c131498_g1_i1	1030	-106.79	149	-16.34	1021677	21	12743
ccr-miR-17-3p	c133651_g1_i1	1030	-141.87	162	-25.12	1053068	23	5900
ccr-miR-183	c142479_g3_i2	1030	-140.73	162	-22.85	1184585	23	9803
ccr-miR-20a-3p	c140472_g6_i12	1030	-134.56	161	-22.59	1678131	23	6059
ccr-miR-20a-3p	c139617_g4_i3	1030	-124.85	151	-21.26	1680329	23	6436
ccr-miR-7132	c140786_g1_i1	1030	-117.56	156	-22.29	3127225	21	5247
ccr-miR-17-3p	c142808_g2_i8	1031	-151.76	163	-29.79	1049557	23	13201
ccr-miR-214	c130465_g1_i1	1031	-137.67	159	-21.72	1746298	19	4618
ccr-miR-27a	c132034_g1_i2	1031	-134.74	157	-23.96	2043248	21	5975
ccr-miR-148	c132253_g1_i3	1032	-110.98	151	-17.98	836749	22	6815
ccr-miR-16c	c140167_g1_i3	1032	-122.08	161	-24.51	1008915	21	12892
ccr-miR-27c-3p	c131394_g1_i1	1032	-132.76	156	-22.72	2069130	22	6665
ccr-miR-27d	c142009_g1_i3	1032	-121.57	159	-23.39	2101385	21	11856
ccr-miR-7132	c138377_g2_i3	1032	-125.41	158	-25.52	3114163	21	5773
ccr-miR-103	c137047_g3_i4	1033	-128.93	156	-26.21	208359	23	7564
ccr-miR-20a-3p	c140176_g7_i11	1033	-130.35	157	-20.83	1681515	23	6260
ccr-miR-20a-3p	c140176_g7_i6	1033	-130.35	157	-20.83	1697210	23	6194
ccr-miR-7b	c144747_g2_i1	1033	-121.72	157	-21.52	2855458	23	6338
ccr-miR-9-3p	c141483_g4_i3	1033	-126.1	156	-23.17	2883109	22	7369
ccr-miR-15a	c82367_g1_i2	1034	-123.34	152	-21.15	850057	21	2666
ccr-miR-17-3p	c137240_g1_i1	1034	-144.13	164	-24.74	1055142	23	6404
ccr-miR-20a-3p	c142736_g1_i3	1034	-136.37	157	-23.31	1690046	23	7627
ccr-miR-457b	c138260_g3_i6	1034	-130.93	162	-25.56	2486357	21	10308
ccr-miR-457b	c138260_g3_i7	1034	-130.93	162	-25.56	2501942	21	10216
ccr-miR-15b	c134476_g1_i4	1035	-126	162	-23.06	956462	21	3491
ccr-miR-15b	c134825_g1_i1	1035	-137.12	152	-24.93	956860	21	5172
ccr-miR-16a	c138260_g3_i2	1035	-118.58	155	-20.97	973527	22	5316
ccr-miR-16b	c138260_g3_i2	1035	-121.65	155	-19.54	995294	22	5316
ccr-miR-24	c129018_g1_i2	1035	-128.17	156	-21.66	1959134	22	13337
ccr-miR-146a	c143338_g2_i3	1036	-121.58	155	-21.38	808413	23	14437
ccr-miR-16b	c138568_g2_i4	1036	-135.73	157	-24.85	999414	22	15271
ccr-miR-17-3p	c141666_g1_i2	1036	-158.64	154	-29.47	1065893	23	6328
ccr-miR-7a	c137375_g1_i1	1036	-124.94	157	-21.19	2831438	24	10332
ccr-miR-17-3p	c135951_g2_i2	1037	-149.17	159	-28.13	1047559	23	7934
ccr-miR-15a	c140143_g1_i2	1038	-124.29	158	-23.58	856414	21	12859
ccr-miR-15b	c144161_g1_i7	1038	-120.6	156	-20.3	956890	21	14716
ccr-miR-16c	c138377_g2_i3	1038	-112.39	152	-18.42	1002764	21	5773
ccr-miR-20a-3p	c140549_g1_i4	1038	-149.9	156	-25.49	1697402	23	13276
ccr-miR-27d	c129328_g1_i2	1038	-124.01	165	-21.49	2101961	21	3463
ccr-miR-138	c143128_g1_i2	1039	-129.24	158	-21.7	650353	21	2656
ccr-miR-139	c126471_g3_i1	1039	-130.19	167	-27.9	657933	23	7351
ccr-miR-15a	c141455_g1_i7	1039	-126.98	154	-20.29	868018	21	7042
ccr-miR-20a-3p	c127585_g2_i4	1039	-135.25	156	-24.07	1685353	23	9941
ccr-miR-27a	c138448_g1_i1	1039	-147.48	153	-24.66	2040926	21	8195
ccr-miR-15a	c140969_g1_i3	1040	-112.33	156	-17.96	849734	21	12599
ccr-miR-15a	c140969_g1_i4	1040	-112.33	156	-17.96	851725	21	12641
ccr-miR-15a	c140969_g1_i1	1040	-112.33	156	-17.96	862247	21	12425
ccr-miR-15b	c137136_g1_i2	1040	-140.94	156	-25.02	936593	21	8586
ccr-miR-16b	c125038_g1_i1	1040	-116.28	158	-19.23	989962	22	1926
ccr-miR-16c	c121281_g1_i1	1040	-106.7	157	-17.26	1001317	21	4055
ccr-miR-17-3p	c140514_g1_i4	1040	-141.5	158	-25.14	1053028	23	4579
ccr-miR-20a-3p	c129753_g1_i1	1040	-141.59	158	-28.12	1676098	23	6488
ccr-miR-214	c126920_g1_i2	1040	-121.45	159	-21.82	1761773	19	5480
ccr-miR-27a	c129328_g1_i2	1040	-132.82	165	-23.15	2036660	21	3463
ccr-miR-730	c141046_g1_i1	1040	-133.38	159	-25.39	2789563	22	6114
ccr-miR-15b	c141552_g2_i1	1041	-117.03	150	-20.94	938252	21	8559
ccr-miR-16a	c131498_g1_i2	1041	-118.72	155	-18.35	970279	22	12635
ccr-miR-16a	c131498_g1_i1	1041	-118.72	155	-18.35	978143	22	12743
ccr-miR-16b	c131498_g1_i2	1041	-120.67	155	-19.08	992046	22	12635
ccr-miR-16b	c131498_g1_i1	1041	-120.67	155	-19.08	999910	22	12743
ccr-miR-16c	c125038_g1_i1	1041	-113.22	157	-19.11	1011729	21	1926
ccr-miR-17-3p	c134867_g1_i1	1041	-151.05	163	-26.81	1056687	23	11296
ccr-miR-27a	c138026_g1_i1	1041	-126.56	161	-22.33	2044714	21	5514
ccr-miR-457b	c141035_g1_i2	1041	-122.83	163	-21.33	2485952	21	15922
ccr-miR-138	c131733_g1_i3	1042	-141.02	166	-24.76	639661	21	5236
ccr-miR-138	c137905_g1_i7	1042	-139.31	164	-24.12	644046	21	7282
ccr-miR-138	c131733_g1_i4	1042	-141.02	166	-24.76	644460	21	5197
ccr-miR-138	c131733_g1_i1	1042	-141.02	166	-24.76	651718	21	5134
ccr-miR-15a	c138260_g3_i2	1042	-125.01	160	-21.26	864692	21	5316
ccr-miR-15b	c130997_g1_i2	1042	-121.29	158	-22.29	949228	21	4882
ccr-miR-15b	c138260_g3_i2	1042	-124.25	159	-20.78	951760	21	5316
ccr-miR-17-3p	c123200_g1_i1	1042	-150.49	161	-25.94	1056399	23	6487
ccr-miR-15a	c107740_g1_i1	1043	-135.7	158	-26.07	851514	21	5569
ccr-miR-16a	c142808_g2_i8	1043	-123.66	154	-20.99	962489	22	13201
ccr-miR-17-3p	c143596_g3_i15	1043	-143.8	158	-23.86	1060784	23	6174
ccr-miR-17-3p	c123446_g1_i1	1043	-141.08	170	-27.12	1064425	23	4975
ccr-miR-730	c38568_g1_i1	1044	-133.01	159	-23.49	2787928	22	4057
ccr-miR-7132	c123068_g1_i1	1044	-140.99	166	-23.2	3125034	21	8353
ccr-miR-16b	c143596_g3_i11	1045	-123.98	159	-19.39	992873	22	6156
ccr-miR-20a-3p	c140160_g1_i3	1045	-124.82	155	-21.4	1692596	23	5373
ccr-miR-24	c137136_g1_i2	1045	-163.07	163	-28.19	1959642	22	8586
ccr-miR-24	c137136_g1_i1	1045	-163.07	163	-28.19	1976657	22	8815
ccr-miR-24	c137136_g1_i5	1045	-163.07	163	-28.19	1977172	22	8628
ccr-miR-27d	c125928_g1_i1	1045	-130.93	155	-24.31	2106218	21	8877
ccr-miR-15b	c141884_g3_i3	1046	-123.43	167	-21.12	940164	21	9341
ccr-miR-15b	c141884_g3_i10	1046	-123.43	167	-21.12	950278	21	9237
ccr-miR-17-3p	c141276_g7_i1	1046	-140.62	180	-27.86	1047077	23	5858
ccr-miR-17-3p	c142563_g4_i1	1046	-155.34	159	-27.41	1053400	23	10113
ccr-miR-16a	c125909_g1_i4	1047	-121.35	157	-21.84	971842	22	1967
ccr-miR-16b	c140167_g1_i3	1047	-125.33	158	-21.82	987148	22	12892
ccr-miR-27c-3p	c138026_g1_i1	1047	-128.42	160	-22.93	2088248	22	5514
ccr-miR-34	c143992_g2_i2	1047	-159.15	160	-28.41	2246404	22	9689
ccr-miR-375	c96729_g2_i1	1047	-131.86	155	-24.96	2316523	22	2133
ccr-miR-457b	c125928_g1_i1	1047	-129	162	-22.94	2498024	21	8877
ccr-miR-16b	c141884_g3_i3	1048	-117.71	163	-20.34	983698	22	9341
ccr-miR-16b	c141884_g3_i10	1048	-117.71	163	-20.34	993812	22	9237
ccr-miR-7a	c129018_g1_i2	1048	-127.8	160	-22.79	2829814	24	13337
ccr-miR-27d	c138026_g1_i1	1050	-128.18	161	-21.6	2110015	21	5514
ccr-miR-107	c143674_g1_i4	1051	-148.87	175	-26.14	224693	22	10637
ccr-miR-18c	c141035_g1_i2	1051	-134.52	165	-21.39	1288767	23	15922
ccr-miR-214	c141737_g3_i1	1051	-133.8	163	-25.18	1756945	19	5797
ccr-miR-107	c141455_g1_i7	1052	-135.11	161	-21.63	236775	22	7042
ccr-miR-122	c138655_g1_i3	1052	-126.1	158	-21.09	305856	21	4646
ccr-miR-122	c138655_g1_i4	1052	-126.1	158	-21.09	310678	21	4407
ccr-miR-122	c138655_g1_i1	1052	-126.1	158	-21.09	316173	21	4634
ccr-miR-103	c141455_g1_i7	1053	-142.2	161	-23.4	215008	23	7042
ccr-miR-20a-3p	c136964_g1_i1	1053	-141.48	157	-22.31	1680309	23	6228
ccr-miR-7b	c126732_g1_i3	1053	-125.2	169	-22.74	2868182	23	7221
ccr-miR-20a-3p	c132376_g1_i4	1054	-131.26	162	-23.19	1685355	23	4903
ccr-miR-20a-3p	c143992_g1_i8	1055	-138.13	161	-30.25	1677224	23	17315
ccr-miR-20a-3p	c143992_g1_i7	1055	-138.13	161	-30.25	1683500	23	17464
ccr-miR-20a-3p	c143992_g1_i10	1055	-138.13	161	-30.25	1684176	23	17180
ccr-miR-20a-3p	c143992_g1_i2	1055	-138.13	161	-30.25	1686659	23	17168
ccr-miR-214	c138856_g3_i2	1055	-133.02	157	-24.05	1751626	19	7585
ccr-miR-103	c143674_g1_i4	1056	-148.45	175	-25.53	202926	23	10637
ccr-miR-22b	c142831_g3_i1	1056	-132.33	162	-21.71	1912846	22	15923
ccr-miR-15b	c140969_g1_i3	1058	-123.12	166	-22.73	936802	21	12599
ccr-miR-15b	c140969_g1_i4	1058	-123.12	166	-22.73	938793	21	12641
ccr-miR-15b	c140969_g1_i1	1058	-123.12	166	-22.73	949315	21	12425
ccr-miR-217	c140143_g1_i2	1058	-144.7	161	-24.25	1770628	23	12859
ccr-miR-217	c140167_g1_i3	1058	-137.87	164	-24.01	1770760	23	12892
ccr-miR-7a	c121528_g1_i1	1058	-124.51	165	-21.51	2839097	24	10793
ccr-miR-7a	c121528_g1_i2	1058	-124.51	165	-21.51	2847791	24	10665
ccr-miR-7132	c123068_g1_i2	1058	-145.61	166	-23.2	3123054	21	6221
ccr-miR-17-3p	c142219_g2_i6	1060	-165.78	172	-28.21	1062408	23	9085
ccr-miR-20a-3p	c139050_g3_i1	1060	-145.04	166	-23.2	1682230	23	6273
ccr-miR-200a	c142009_g1_i3	1061	-121.56	158	-20.8	1513676	21	11856
ccr-miR-29a	c144057_g1_i5	1061	-113.05	163	-19.15	2112186	22	8787
ccr-miR-20a-3p	c138193_g1_i1	1063	-135.41	158	-23.77	1686026	23	6937
ccr-miR-20a-3p	c143090_g3_i2	1065	-130.27	162	-20.74	1676967	23	8598
ccr-miR-20a-3p	c143090_g3_i3	1065	-130.27	162	-20.74	1693464	23	7542
ccr-miR-214	c138377_g2_i3	1068	-134.24	158	-23.94	1742842	19	5773
ccr-miR-15a	c140292_g1_i2	1070	-123.13	164	-21.3	859018	21	7254
ccr-miR-16a	c136375_g2_i1	1071	-135.34	176	-23.19	969181	22	7704
ccr-miR-199-5p	c129980_g1_i2	1071	-132.3	167	-24.61	1448745	23	10406
ccr-miR-214	c127622_g1_i4	1071	-138.77	163	-26.67	1744840	19	7434
ccr-miR-214	c127622_g1_i2	1071	-138.77	163	-26.67	1754969	19	7489
ccr-miR-214	c127622_g1_i3	1071	-138.77	163	-26.67	1759231	19	7451
ccr-miR-27d	c134026_g1_i4	1071	-116.53	159	-18.73	2093314	21	6877
ccr-miR-15a	c141626_g1_i2	1072	-139.56	167	-24.64	864546	21	13230
ccr-miR-338	c133560_g1_i3	1072	-132.29	161	-22.69	2232140	22	14693
ccr-miR-27c-3p	c129328_g1_i2	1073	-146.92	167	-23.95	2080194	22	3463
ccr-miR-143	c142865_g2_i3	1075	-132.47	166	-25.09	767684	20	5644
ccr-miR-143	c142865_g2_i4	1075	-132.47	166	-25.09	781482	20	5557
ccr-miR-24	c144182_g2_i5	1076	-174.8	175	-32.68	1961593	22	8977
ccr-miR-24	c144182_g2_i3	1076	-174.8	175	-32.68	1971482	22	11038
ccr-miR-27a	c134026_g1_i4	1077	-127.96	160	-20.66	2028013	21	6877
ccr-miR-16c	c141455_g1_i7	1078	-115.19	164	-19.81	1020387	21	7042
ccr-miR-181c	c131394_g1_i1	1083	-136.8	167	-28.68	1111382	22	6665
ccr-miR-128	c142419_g5_i6	1085	-145.12	162	-25.49	418468	21	8989
ccr-miR-22a	c139413_g1_i3	1088	-142.73	166	-24.03	1893187	22	9528
ccr-miR-27c-3p	c134026_g1_i4	1092	-143.08	163	-22.9	2071547	22	6877
ccr-miR-17-3p	c141387_g3_i5	1142	-153.67	148	-23.1	1064535	23	5939
ccr-miR-17-3p	c142083_g1_i6	1143	-161.24	147	-24.19	1049251	23	3584
ccr-miR-184	c141720_g1_i4	1145	-166.82	147	-24.4	1197239	22	8396
ccr-miR-184	c141720_g1_i1	1145	-166.82	147	-24.4	1205091	22	8381
ccr-miR-16a	c138346_g2_i13	1150	-136.89	152	-22.01	966029	22	9396
ccr-miR-16a	c138346_g2_i2	1150	-136.89	152	-22.01	977167	22	9555
ccr-miR-16b	c142865_g2_i4	1150	-135.86	149	-21.56	999152	22	5557
ccr-miR-457a	c142831_g3_i1	1154	-133.06	150	-18.9	2478788	20	15923
ccr-miR-2192	c143338_g2_i3	1156	-147.12	150	-20.8	3028647	21	14437
ccr-miR-22a	c138966_g2_i3	1157	-150.38	151	-21.39	1893083	22	11737
ccr-let-7b	c123094_g2_i2	1158	-178.64	156	-25.37	24000	22	4811
ccr-let-7b	c123094_g2_i1	1158	-178.64	156	-25.37	39757	22	4871
ccr-miR-16a	c105358_g1_i2	1159	-138.62	155	-21.29	961720	22	6022
ccr-miR-16b	c105358_g1_i2	1159	-142.91	155	-23.37	983487	22	6022
ccr-miR-16c	c136850_g3_i3	1159	-130.31	151	-20.81	1005347	21	4919
ccr-miR-16a	c136014_g1_i1	1160	-138.56	156	-22.94	962642	22	15541
ccr-miR-17-3p	c136964_g1_i1	1160	-156.33	158	-25.93	1049066	23	6228
ccr-miR-128	c142009_g1_i3	1162	-163.76	152	-23.99	425326	21	11856
ccr-miR-16b	c140231_g1_i1	1162	-140.36	150	-18.84	981602	22	5692
ccr-miR-18b	c139692_g3_i2	1162	-131.71	152	-20.66	1278230	23	7721
ccr-miR-457a	c143674_g1_i5	1162	-137.91	151	-23.72	2461996	20	19057
ccr-miR-457a	c143674_g1_i2	1162	-137.91	151	-23.72	2478733	20	19154
ccr-miR-17-3p	c142736_g1_i1	1163	-162.23	155	-25.64	1050639	23	6125
ccr-miR-17-3p	c142736_g1_i3	1163	-164.06	153	-26.53	1058803	23	7627
ccr-miR-18a	c139692_g3_i2	1164	-139.51	152	-22.9	1256463	23	7721
ccr-miR-199-5p	c141626_g1_i2	1164	-135.23	153	-21.24	1452255	23	13230
ccr-miR-7a	c143338_g2_i3	1164	-137.94	150	-22.16	2832744	24	14437
ccr-miR-15a	c134476_g1_i3	1165	-157.85	152	-27.49	863537	21	7617
ccr-miR-16c	c105358_g1_i2	1165	-129.89	156	-19.44	1005254	21	6022
ccr-miR-139	c141626_g1_i2	1166	-146.95	150	-25.41	668643	23	13230
ccr-miR-17-3p	c139617_g4_i3	1166	-160.78	156	-25.19	1049086	23	6436
ccr-miR-107	c143992_g1_i8	1167	-165.89	152	-25.08	218835	22	17315
ccr-miR-107	c143992_g1_i7	1167	-165.89	152	-25.08	225111	22	17464
ccr-miR-107	c143992_g1_i10	1167	-165.89	152	-25.08	225787	22	17180
ccr-miR-107	c143992_g1_i2	1167	-165.89	152	-25.08	228270	22	17168
ccr-miR-24	c138377_g2_i3	1168	-175.1	157	-28.91	1960512	22	5773
ccr-miR-34	c140585_g1_i1	1168	-176.83	152	-26.29	2249138	22	12900
ccr-miR-457b	c143674_g1_i5	1168	-137.32	158	-20.1	2483763	21	19057
ccr-miR-457b	c143674_g1_i2	1168	-137.32	158	-20.1	2500500	21	19154
ccr-miR-15a	c144161_g1_i7	1169	-140.46	154	-22.17	869822	21	14716
ccr-miR-24	c142586_g4_i1	1169	-161.13	152	-24.69	1963254	22	12109
ccr-miR-457b	c142831_g3_i1	1169	-144.21	153	-21.07	2500555	21	15923
ccr-miR-16a	c135029_g1_i3	1170	-145.73	151	-26.21	974579	22	9860
ccr-miR-16b	c135029_g1_i3	1170	-139.31	151	-21.61	996346	22	9860
ccr-miR-20a-3p	c140472_g6_i13	1170	-152.92	161	-22.59	1695687	23	6634
ccr-miR-27d	c132034_g1_i2	1170	-148.54	157	-22.7	2108549	21	5975
ccr-miR-15a	c142865_g2_i4	1174	-135.3	155	-19.26	868550	21	5557
ccr-miR-93	c137523_g1_i1	1174	-147.11	159	-21.12	2962036	23	12114
ccr-miR-93	c137523_g1_i8	1174	-147.11	159	-21.12	2966607	23	12034
ccr-let-7b	c141035_g1_i2	1175	-159.41	166	-22.64	26281	22	15922
ccr-miR-20a-3p	c138346_g2_i13	1175	-170.64	157	-26.4	1684340	23	9396
ccr-miR-20a-3p	c138346_g2_i2	1175	-170.64	157	-26.4	1695478	23	9555
ccr-miR-27c-3p	c138448_g1_i1	1175	-156.18	152	-24.81	2084460	22	8195
ccr-miR-15b	c136014_g1_i1	1176	-141.79	161	-22.13	940875	21	15541
ccr-miR-20a-3p	c140895_g1_i4	1176	-147.1	160	-22.37	1688555	23	9400
ccr-miR-27c-3p	c125928_g1_i1	1176	-150.14	153	-21.62	2084451	22	8877
ccr-miR-15a	c138329_g1_i4	1179	-151.14	153	-20.8	866591	21	14524
ccr-miR-7132	c131607_g1_i1	1179	-140.12	155	-20.71	3123891	21	8280
ccr-miR-181b	c128636_g1_i5	1180	-148.63	164	-24.03	1099198	21	5720
ccr-miR-22b	c138966_g2_i3	1180	-160.65	158	-24.09	1914850	22	11737
ccr-miR-17-3p	c138193_g1_i1	1181	-161.33	153	-25.41	1054783	23	6937
ccr-miR-20a-3p	c144003_g4_i1	1181	-157.78	156	-22.2	1688917	23	15604
ccr-miR-15a	c129018_g1_i2	1182	-128.44	159	-22.91	849017	21	13337
ccr-miR-15a	c137481_g4_i4	1182	-156.36	161	-23.97	865519	21	5621
ccr-miR-214	c140231_g1_i1	1182	-153.17	161	-27.92	1743447	19	5692
ccr-miR-725	c143338_g2_i3	1183	-137.38	161	-19.83	2680375	22	14437
ccr-miR-15a	c143674_g1_i5	1184	-142.76	166	-23.04	851238	21	19057
ccr-miR-15a	c143674_g1_i2	1184	-142.76	166	-23.04	867975	21	19154
ccr-miR-15a	c143596_g3_i11	1185	-146.38	161	-25.48	862271	21	6156
ccr-miR-15b	c107740_g1_i1	1185	-149.29	164	-24.05	938582	21	5569
ccr-miR-15b	c137481_g4_i4	1185	-150.16	153	-21.89	952587	21	5621
ccr-miR-20a-3p	c133560_g1_i3	1185	-154.34	154	-22.42	1687965	23	14693
ccr-miR-24	c107914_g1_i1	1185	-166.78	160	-25.98	1960144	22	8823
ccr-miR-16a	c121281_g1_i1	1186	-129.46	157	-17.65	957783	22	4055
ccr-miR-16c	c125909_g1_i4	1186	-127.48	154	-18.42	1015376	21	1967
ccr-miR-181c	c138448_g1_i1	1186	-163.76	160	-26	1126712	22	8195
ccr-miR-730	c141035_g1_i2	1186	-147.02	161	-25.2	2790690	22	15922
ccr-miR-27c-3p	c144182_g2_i5	1188	-150.78	159	-27.66	2070428	22	8977
ccr-miR-27c-3p	c144182_g2_i3	1188	-150.78	159	-27.66	2080317	22	11038
ccr-miR-7132	c143338_g2_i3	1188	-148.72	160	-23.59	3115715	21	14437
ccr-miR-730	c140044_g3_i3	1189	-155.12	162	-22.72	2786712	22	13083
ccr-miR-130c	c143379_g1_i6	1190	-131.51	160	-19.26	506382	22	10708
ccr-miR-130c	c143379_g1_i8	1190	-131.51	160	-19.26	518375	22	10691
ccr-miR-16a	c140167_g1_i3	1190	-135.77	158	-20.85	965381	22	12892
ccr-miR-16b	c125909_g1_i4	1190	-136.63	157	-21.91	993609	22	1967
ccr-miR-16b	c142808_g2_i8	1191	-147.61	154	-22.5	984256	22	13201
ccr-miR-17-3p	c129117_g1_i4	1191	-175.15	170	-31.38	1050005	23	6608
ccr-miR-17-3p	c129117_g1_i5	1191	-175.15	170	-31.38	1050831	23	7317
ccr-miR-15a	c138377_g2_i3	1192	-144.65	163	-26.26	850395	21	5773
ccr-miR-17-3p	c142479_g3_i2	1192	-184.62	160	-29.11	1053983	23	9803
ccr-miR-20a-3p	c142009_g1_i3	1192	-145.3	165	-23.31	1687812	23	11856
ccr-miR-15b	c142865_g2_i3	1193	-149.87	159	-26.47	941820	21	5644
ccr-miR-15b	c142865_g2_i4	1193	-149.87	159	-26.47	955618	21	5557
ccr-miR-181c	c128636_g1_i3	1193	-160.41	164	-26.91	1130270	22	5465
ccr-miR-24	c138759_g1_i5	1193	-186.22	160	-28.11	1959878	22	7995
ccr-miR-24	c138759_g1_i2	1193	-186.22	160	-28.11	1977355	22	8229
ccr-miR-27c-3p	c132034_g1_i1	1193	-156.5	155	-23.65	2068308	22	5919
ccr-miR-15a	c135782_g3_i2	1195	-148.49	157	-21.93	854226	21	1677
ccr-miR-15a	c135782_g3_i4	1195	-148.49	157	-21.93	865959	21	1764
ccr-miR-214	c135782_g3_i2	1195	-143.13	159	-20.55	1746673	19	1677
ccr-miR-214	c135782_g3_i4	1195	-143.13	159	-20.55	1758406	19	1764
ccr-miR-17-3p	c129018_g1_i2	1196	-155.72	162	-22.25	1044920	23	13337
ccr-miR-725	c133560_g1_i3	1198	-137.64	159	-19.97	2689247	22	14693
ccr-miR-17-3p	c132376_g1_i4	1199	-163.44	161	-25.26	1054112	23	4903
ccr-miR-15b	c143674_g1_i5	1200	-141.01	159	-22.36	938306	21	19057
ccr-miR-15b	c143674_g1_i2	1200	-141.01	159	-22.36	955043	21	19154
ccr-miR-138	c138749_g1_i10	1201	-168.54	162	-25.66	634073	21	3071
ccr-miR-138	c138749_g1_i6	1201	-168.54	162	-25.66	635828	21	3086
ccr-miR-138	c138749_g1_i9	1201	-168.54	162	-25.66	647337	21	3029
ccr-miR-15b	c124761_g1_i3	1202	-152.76	162	-23.07	951271	21	3454
ccr-miR-20a-3p	c129117_g1_i4	1202	-158.19	166	-25.86	1681248	23	6608
ccr-miR-20a-3p	c129117_g1_i5	1202	-158.19	166	-25.86	1682074	23	7317
ccr-miR-727-3p	c143674_g1_i5	1203	-156.42	170	-28.18	2744967	22	19057
ccr-miR-727-3p	c143674_g1_i2	1203	-156.42	170	-28.18	2761704	22	19154
ccr-miR-34	c142479_g3_i2	1204	-174.33	170	-26.49	2251168	22	9803
ccr-miR-489	c144003_g4_i1	1204	-151.1	161	-22.39	2603131	22	15604
ccr-miR-20a-3p	c140734_g1_i2	1206	-174.05	164	-25.07	1685192	23	3816
ccr-miR-7132	c133992_g1_i2	1206	-146.99	165	-23.67	3133249	21	5646
ccr-miR-214	c138856_g3_i1	1207	-153.98	157	-24.05	1762617	19	8145
ccr-miR-214	c119638_g1_i1	1213	-161.8	164	-23.87	1760971	19	5285
ccr-miR-181c	c140137_g6_i1	1217	-154.55	160	-27.25	1118483	22	5797
ccr-miR-20a-3p	c129018_g1_i2	1217	-153	161	-22.56	1676163	23	13337
ccr-miR-22b	c139413_g1_i3	1221	-172.53	166	-26.63	1914954	22	9528
ccr-miR-24	c144604_g2_i1	1223	-175.47	160	-26.94	1970720	22	7276
ccr-miR-138	c136306_g1_i2	1224	-143.76	161	-21.96	635612	21	2071
ccr-miR-20a-3p	c138193_g1_i4	1226	-158.73	163	-23.77	1678851	23	8041
ccr-miR-7a	c142180_g2_i2	1226	-154.09	170	-23.57	2842035	24	14252
ccr-miR-24	c144604_g2_i5	1229	-170.73	160	-25.87	1973065	22	7267
ccr-miR-489	c133933_g2_i2	1272	-151.53	169	-25.04	2595666	22	6151
ccr-miR-103	c143992_g1_i8	1307	-186.98	152	-25.35	197068	23	17315
ccr-miR-103	c143992_g1_i7	1307	-186.98	152	-25.35	203344	23	17464
ccr-miR-103	c143992_g1_i10	1307	-186.98	152	-25.35	204020	23	17180
ccr-miR-103	c143992_g1_i2	1307	-186.98	152	-25.35	206503	23	17168
ccr-miR-199-5p	c141626_g1_i5	1307	-151.2	153	-21.24	1445984	23	11651
ccr-miR-17-3p	c142831_g3_i1	1308	-162.09	154	-25.49	1063933	23	15923
ccr-miR-20a-3p	c138591_g1_i2	1309	-174.35	156	-25.13	1678258	23	8154
ccr-miR-16a	c140231_g1_i1	1313	-150.68	151	-18.7	959835	22	5692
ccr-miR-20a-3p	c142808_g2_i8	1316	-166.45	153	-23.44	1680800	23	13201
ccr-miR-34	c140585_g1_i3	1316	-198.7	152	-26.29	2260928	22	12911
ccr-miR-17-3p	c140585_g1_i1	1318	-181.93	158	-23.24	1051953	23	12900
ccr-miR-17-3p	c140585_g1_i3	1318	-181.93	158	-23.24	1063743	23	12911
ccr-miR-15b	c105358_g1_i2	1320	-162.03	154	-22.27	939953	21	6022
ccr-miR-338	c141035_g1_i2	1320	-176.79	153	-25.2	2224748	22	15922
ccr-miR-15a	c105358_g1_i2	1322	-154.51	154	-21.44	852885	21	6022
ccr-miR-730	c128623_g1_i2	1325	-181.76	167	-27.59	2803531	22	8193
ccr-miR-143	c131607_g1_i1	1326	-155.8	165	-23.5	773055	20	8280
ccr-miR-20a-3p	c140585_g1_i1	1326	-150.74	162	-20.8	1683196	23	12900
ccr-miR-20a-3p	c140585_g1_i3	1326	-150.74	162	-20.8	1694986	23	12911
ccr-miR-15b	c140231_g1_i1	1328	-158.8	161	-23.14	938068	21	5692
ccr-miR-22a	c138329_g1_i4	1330	-173.65	156	-23.43	1889640	22	14524
ccr-miR-15a	c140231_g1_i1	1331	-157.51	162	-21.06	851000	21	5692
ccr-miR-16a	c142831_g3_i1	1331	-162.6	159	-20.43	976865	22	15923
ccr-miR-16b	c142831_g3_i1	1331	-160.03	159	-19.07	998632	22	15923
ccr-miR-17-3p	c138193_g1_i4	1331	-179.75	153	-25.41	1047608	23	8041
ccr-miR-214	c140549_g1_i4	1333	-169.31	159	-22.92	1762703	19	13276
ccr-miR-17-3p	c127585_g2_i4	1334	-195.44	160	-26.59	1054110	23	9941
ccr-miR-214	c142808_g2_i8	1334	-177.84	161	-30.43	1746101	19	13201
ccr-miR-20a-3p	c131403_g1_i2	1344	-175.57	165	-24.68	1695353	23	4634
ccr-miR-15a	c138260_g3_i6	1345	-157.5	160	-22.1	853832	21	10308
ccr-miR-15a	c138260_g3_i7	1345	-157.5	160	-22.1	869417	21	10216
ccr-miR-27c-3p	c132034_g1_i2	1347	-180.72	155	-24.22	2086782	22	5975
ccr-miR-730	c142786_g1_i3	1349	-176.27	163	-24.52	2793856	22	10709
ccr-miR-730	c142786_g1_i4	1349	-176.27	163	-24.52	2798571	22	10722
ccr-miR-15b	c138260_g3_i6	1350	-161.44	159	-21.14	940900	21	10308
ccr-miR-15b	c130465_g1_i1	1350	-147.14	162	-20.61	940919	21	4618
ccr-miR-15b	c138260_g3_i7	1350	-161.44	159	-21.14	956485	21	10216
ccr-miR-20a-3p	c140514_g1_i4	1353	-185.92	168	-26.91	1684271	23	4579
ccr-miR-22b	c138329_g1_i4	1353	-188.24	164	-29.96	1911407	22	14524
ccr-miR-20a-3p	c142219_g2_i6	1355	-196.01	162	-26.53	1693651	23	9085
ccr-miR-24	c143674_g1_i4	1357	-200.39	166	-27.72	1966053	22	10637
ccr-miR-7b	c142180_g2_i2	1365	-165.45	162	-23.16	2863802	23	14252
ccr-miR-16b	c130465_g1_i1	1381	-158.43	162	-23.12	984453	22	4618
ccr-miR-17-3p	c138346_g2_i13	1451	-208.39	156	-31.57	1053097	23	9396
ccr-miR-17-3p	c138346_g2_i2	1451	-208.39	156	-31.57	1064235	23	9555
ccr-miR-27c-3p	c142009_g1_i3	1452	-184.18	159	-24.21	2079618	22	11856
ccr-miR-133a-3p	c142180_g2_i2	1453	-192.69	155	-22.87	578267	22	14252
ccr-miR-20a-3p	c142736_g1_i1	1455	-183.8	157	-23.43	1681882	23	6125
ccr-miR-27a	c142009_g1_i3	1455	-187.96	163	-23.03	2036084	21	11856
ccr-miR-22b	c138448_g1_i1	1456	-179.73	161	-21.33	1910324	22	8195
ccr-miR-15a	c141413_g1_i3	1457	-171.67	157	-20.45	855120	21	7361
ccr-miR-18a	c142586_g4_i1	1467	-186.2	163	-21.72	1244943	23	12109
ccr-miR-22a	c138448_g1_i1	1467	-182.02	168	-21	1888557	22	8195
ccr-miR-2192	c142282_g1_i3	1467	-184.73	159	-24.41	3035643	21	6733
ccr-miR-20a-3p	c142831_g3_i1	1472	-192.75	159	-23.57	1695176	23	15923
ccr-miR-15b	c142831_g3_i1	1475	-184	155	-23.5	955098	21	15923
ccr-miR-17-3p	c139687_g1_i3	1476	-218.74	157	-28.39	1049376	23	2833
ccr-miR-15b	c141413_g1_i3	1478	-175.14	157	-20.83	942188	21	7361
ccr-miR-17-3p	c142009_g1_i3	1478	-208.66	165	-24.97	1056569	23	11856
ccr-miR-15a	c134476_g1_i4	1481	-189.28	158	-27.49	869394	21	3491
ccr-miR-181c	c128636_g1_i5	1485	-199.84	164	-26.91	1120965	22	5720
ccr-miR-15a	c138759_g1_i5	1486	-175.44	159	-20.89	849761	21	7995
ccr-miR-15a	c138759_g1_i2	1486	-175.44	159	-20.89	867238	21	8229
ccr-miR-16a	c138260_g3_i6	1488	-170.98	163	-20.97	962667	22	10308
ccr-miR-16a	c138260_g3_i7	1488	-170.98	163	-20.97	978252	22	10216
ccr-miR-16b	c138260_g3_i6	1488	-179.19	163	-24.17	984434	22	10308
ccr-miR-16b	c140292_g1_i2	1488	-166.57	160	-20.39	989620	22	7254
ccr-miR-16b	c138260_g3_i7	1488	-179.19	163	-24.17	1000019	22	10216
ccr-miR-146a	c131607_g1_i1	1494	-177.97	161	-22.9	816589	23	8280
ccr-miR-725	c144161_g1_i7	1495	-179.17	160	-24.91	2698250	22	14716
ccr-miR-7132	c142808_g2_i11	1499	-183.56	158	-21.85	3126833	21	7982
ccr-miR-15a	c142831_g3_i1	1510	-198.9	168	-25.09	868030	21	15923
ccr-miR-15b	c121281_g1_i1	1517	-188.96	170	-23.96	936016	21	4055
ccr-miR-214	c121640_g2_i2	1523	-192.69	169	-24.16	1749376	19	5714
ccr-miR-214	c121640_g2_i1	1523	-192.69	169	-24.16	1754157	19	4238
ccr-miR-34	c142831_g3_i1	1592	-238.82	152	-26.05	2261118	22	15923
ccr-miR-16a	c138759_g1_i5	1608	-184.22	151	-22.53	958596	22	7995
ccr-miR-16a	c138759_g1_i2	1608	-184.22	151	-22.53	976073	22	8229
ccr-miR-15b	c141413_g1_i1	1616	-194.71	157	-20.83	956500	21	6575
ccr-miR-16b	c138759_g1_i5	1617	-193.05	151	-20.79	980363	22	7995
ccr-miR-16b	c138759_g1_i2	1617	-193.05	151	-20.79	997840	22	8229
ccr-miR-16b	c121281_g1_i1	1619	-184.45	157	-19.5	979550	22	4055
ccr-miR-199-5p	c142631_g1_i1	1619	-215.46	152	-27.68	1455070	23	11453
ccr-miR-107	c143674_g1_i5	1628	-228.15	175	-26.14	219995	22	19057
ccr-miR-107	c143674_g1_i2	1628	-228.15	175	-26.14	236732	22	19154
ccr-miR-138	c134239_g1_i5	1640	-202.18	160	-25.35	633921	21	5867
ccr-miR-7132	c135191_g1_i4	1640	-203.2	164	-24.55	3114221	21	11650
ccr-miR-7132	c135191_g1_i1	1640	-203.2	164	-24.55	3118071	21	11665
ccr-miR-103	c143674_g1_i5	1642	-236.81	175	-30.09	198228	23	19057
ccr-miR-103	c143674_g1_i2	1642	-236.81	175	-30.09	214965	23	19154
ccr-miR-125b	c137481_g4_i4	1642	-222.57	165	-25.65	343111	22	5621
ccr-miR-125c	c137481_g4_i4	1644	-224.76	165	-25.35	364878	22	5621
ccr-miR-15b	c141035_g1_i2	1655	-189.06	161	-24.81	940495	21	15922
ccr-miR-7132	c142808_g2_i8	1659	-203.53	160	-21.85	3117422	21	13201
ccr-miR-20a-3p	c139687_g1_i3	1660	-235.06	164	-25.68	1680619	23	2833
ccr-miR-375	c138073_g2_i3	1663	-220.68	163	-24.21	2308464	22	6615
ccr-miR-9-3p	c138470_g2_i3	1664	-187.71	164	-20.77	2888648	22	10233
ccr-miR-16a	c130465_g1_i1	1676	-186.22	162	-23.73	962686	22	4618
ccr-miR-16c	c141413_g1_i1	1729	-202.72	154	-20.42	1021801	21	6575
ccr-miR-15a	c141413_g1_i1	1748	-206.2	157	-20.45	869432	21	6575
ccr-miR-16c	c141413_g1_i3	1754	-203.4	159	-20.42	1007489	21	7361
ccr-miR-15b	c138759_g1_i5	1776	-207.21	160	-21.23	936829	21	7995
ccr-miR-7132	c143674_g1_i5	1788	-220.07	157	-21.64	3115006	21	19057
ccr-miR-7132	c143674_g1_i2	1788	-220.07	157	-21.64	3131743	21	19154
ccr-miR-214	c142830_g5_i15	1910	-269.1	163	-30.08	1750071	19	7518
ccr-miR-214	c142830_g5_i6	1910	-269.1	163	-30.08	1753889	19	7594
ccr-miR-214	c142830_g5_i14	1910	-269.1	163	-30.08	1756753	19	7512
ccr-miR-214	c138759_g1_i5	1911	-252.78	158	-24.47	1742208	19	7995
ccr-miR-214	c138759_g1_i2	1911	-252.78	158	-24.47	1759685	19	8229
ccr-miR-15b	c138759_g1_i2	1918	-231.05	160	-23.84	954306	21	8229
ccr-miR-15a	c121281_g1_i1	1930	-222.47	162	-19.78	848948	21	4055
ccr-miR-15a	c130465_g1_i1	1969	-225.11	163	-23.59	853851	21	4618
ccr-miR-17-3p	c143992_g1_i8	2036	-303.01	152	-28.52	1045981	23	17315
ccr-miR-17-3p	c143992_g1_i7	2036	-303.01	152	-28.52	1052257	23	17464
ccr-miR-17-3p	c143992_g1_i10	2036	-303.01	152	-28.52	1052933	23	17180
ccr-miR-17-3p	c143992_g1_i2	2036	-303.01	152	-28.52	1055416	23	17168
ccr-miR-16a	c141413_g1_i1	2050	-241.7	155	-20.53	978267	22	6575
ccr-miR-16a	c141413_g1_i3	2065	-238.81	159	-20.53	963955	22	7361
ccr-miR-16b	c141413_g1_i1	2190	-259.79	155	-22.53	1000034	22	6575
ccr-miR-16b	c141413_g1_i3	2205	-258.16	159	-22.53	985722	22	7361
ccr-miR-24	c143674_g1_i5	2228	-326.44	166	-27.72	1961355	22	19057
ccr-miR-24	c143674_g1_i2	2228	-326.44	166	-27.72	1978092	22	19154
ccr-miR-29b	c137481_g4_i4	2686	-335.31	177	-25.54	2149772	23	5621
ccr-miR-15a	c141575_g2_i3	2700	-336.75	162	-23.55	852777	21	10024
ccr-miR-16c	c141575_g2_i3	2771	-312.08	155	-19.66	1005146	21	10024
ccr-miR-214	c141575_g2_i3	2793	-354.7	167	-27.02	1745224	19	10024
ccr-miR-29b	c137481_g4_i7	2798	-337.61	167	-25.76	2154495	23	5449
ccr-miR-15b	c141575_g2_i3	2803	-323.7	158	-22.08	939845	21	10024
ccr-miR-16a	c141575_g2_i3	2813	-340	160	-21.02	961612	22	10024
ccr-miR-16b	c141575_g2_i3	2813	-339.64	160	-20.72	983379	22	10024
ccr-miR-29a	c137481_g4_i7	2897	-342.55	162	-24.61	2132728	22	5449
ccr-miR-29a	c137481_g4_i4	2925	-356.04	168	-24.61	2128005	22	5621
ccr-miR-7132	c129018_g1_i2	3713	-465.6	169	-26.72	3112785	21	13337
fru-miR-183	c136014_g1_i1	1000	-139.36	147	-21.98	2094526	23	15541
fru-miR-214	c116466_g1_i1	1002	-129.7	148	-23.04	1423697	21	6497
fru-miR-214	c138223_g1_i4	1003	-114.24	154	-17.39	1427604	21	7066
fru-miR-205	c141035_g1_i2	1004	-141.53	149	-28.45	744592	22	15922
fru-miR-16	c142865_g2_i3	1004	-121.38	149	-21.56	2291374	22	5644
fru-miR-214	c138875_g3_i7	1006	-138.59	153	-24.53	1425405	21	6190
fru-miR-214	c138875_g3_i3	1006	-138.59	153	-24.53	1427814	21	4900
fru-miR-15b	c138368_g1_i4	1007	-128.34	157	-23.51	2050878	22	8589
fru-miR-16	c138346_g2_i13	1007	-119.11	152	-19.42	2293816	22	9396
fru-miR-16	c138346_g2_i2	1007	-119.11	152	-19.42	2304954	22	9555
fru-miR-122	c143338_g2_i3	1009	-131.92	151	-24.16	1026083	22	14437
fru-miR-214	c133560_g1_i3	1009	-122.5	153	-21.18	1426761	21	14693
fru-miR-15a	c130316_g1_i5	1009	-126.38	154	-20.36	2268567	22	3181
fru-miR-138	c139963_g9_i3	1010	-137.71	158	-25.22	1992831	22	5640
fru-miR-138	c135038_g2_i3	1010	-143.41	156	-24.24	1997449	22	3606
fru-miR-15b	c143674_g1_i5	1010	-143.75	151	-26.62	2048423	22	19057
fru-miR-9	c142222_g5_i5	1011	-113.98	149	-19.42	205137	23	10545
fru-miR-9	c142222_g5_i6	1011	-113.98	149	-19.42	207447	23	10579
fru-miR-138	c139378_g3_i1	1011	-156.65	157	-28.05	1983774	22	5248
fru-miR-138	c133430_g2_i1	1011	-129.2	151	-22.11	1992500	22	2905
fru-miR-24-3p	c140987_g1_i6	1012	-140.63	151	-26.96	1846795	22	15902
fru-miR-24-3p	c140987_g1_i1	1012	-140.63	151	-26.96	1847051	22	15839
fru-miR-122	c133547_g3_i2	1013	-126.68	159	-21.77	1025291	22	8226
fru-miR-214	c142017_g1_i2	1013	-141.19	154	-22.63	1422684	21	3152
fru-miR-138	c126164_g1_i1	1013	-144.83	149	-23.47	1996882	22	7901
fru-miR-214	c140461_g5_i2	1014	-128.6	150	-25.65	1428906	21	7926
fru-miR-214	c140461_g5_i1	1014	-128.6	150	-25.65	1430243	21	7451
fru-miR-16	c136850_g3_i3	1014	-116.72	147	-19	2289600	22	4919
fru-miR-129	c140468_g1_i2	1015	-129.97	154	-23.21	1508548	22	5914
fru-miR-138	c143365_g2_i3	1015	-129.81	158	-24.81	2001603	22	6481
fru-miR-15a	c140361_g1_i1	1015	-126.95	153	-22.2	2269991	22	8064
fru-miR-15a	c140361_g1_i3	1015	-126.95	153	-22.2	2282697	22	7847
fru-miR-9	c140987_g1_i6	1016	-126.72	152	-22.22	214270	23	15902
fru-miR-9	c140987_g1_i1	1016	-126.72	152	-22.22	214526	23	15839
fru-miR-15a	c132848_g1_i3	1016	-131.34	151	-21.75	2275965	22	6400
fru-miR-214	c136575_g1_i2	1018	-135.61	156	-29.64	1420076	21	8496
fru-miR-214	c136575_g1_i4	1018	-135.61	156	-29.64	1426710	21	8515
fru-miR-214	c142831_g3_i1	1018	-135.65	153	-23.83	1433972	21	15923
fru-miR-338	c140976_g1_i3	1019	-124.09	153	-23.04	1226839	22	7365
fru-miR-24-3p	c140069_g1_i3	1019	-141.03	155	-23.42	1829253	22	9655
fru-miR-138	c142586_g4_i1	1019	-136.94	155	-23.08	1985021	22	12109
fru-miR-15b	c116131_g1_i6	1019	-144.48	157	-27.22	2066537	22	3935
fru-miR-183	c142378_g1_i6	1019	-121.23	157	-21.13	2091779	23	14580
fru-miR-183	c142378_g1_i7	1019	-121.23	157	-21.13	2099280	23	14511
fru-miR-183	c142378_g1_i3	1019	-121.23	157	-21.13	2100826	23	14655
fru-miR-122	c140090_g7_i5	1020	-129.53	151	-20.42	1032769	22	8134
fru-let-7d	c141035_g1_i2	1020	-130.27	158	-21.84	1071097	22	15922
fru-miR-16	c136014_g1_i1	1020	-119.05	156	-22.86	2290429	22	15541
fru-miR-205	c143416_g1_i1	1021	-151.42	158	-26.66	744010	22	9981
fru-miR-132	c140374_g1_i2	1022	-139.1	158	-23.09	1755101	22	11503
fru-miR-132	c140374_g1_i5	1022	-139.1	158	-23.09	1760223	22	12507
fru-miR-24-3p	c133547_g3_i2	1022	-142.73	158	-24.52	1830670	22	8226
fru-miR-27e	c137523_g1_i1	1022	-126.18	152	-21.39	1851919	22	12114
fru-miR-27e	c137523_g1_i8	1022	-126.18	152	-21.39	1856490	22	12034
fru-miR-16	c137481_g4_i4	1022	-129.62	150	-22.22	2302141	22	5621
fru-miR-16	c144161_g1_i7	1022	-116.54	154	-19.38	2306444	22	14716
fru-miR-205	c132831_g1_i1	1023	-145.61	163	-27.46	745702	22	4509
fru-miR-205	c132831_g1_i2	1023	-145.61	163	-27.46	753318	22	4653
fru-miR-129	c133328_g1_i2	1023	-137.72	154	-23.88	1518858	22	4742
fru-miR-214	c140160_g1_i4	1024	-143.84	163	-30.77	1415401	21	5433
fru-miR-214	c142586_g4_i1	1024	-150.42	159	-24.1	1419079	21	12109
fru-miR-16	c132848_g1_i3	1024	-120.85	150	-23.37	2297732	22	6400
fru-miR-9	c144143_g2_i2	1025	-117.7	154	-19.3	197928	23	8745
fru-miR-15a	c137136_g1_i2	1025	-130	155	-21	2264380	22	8586
fru-miR-15a	c136850_g3_i3	1025	-120.47	154	-20.85	2267833	22	4919
fru-miR-216b	c142378_g1_i3	1026	-122	153	-20.56	860107	22	14655
fru-miR-24-3p	c142479_g3_i2	1026	-148.87	155	-26.45	1837595	22	9803
fru-miR-15a	c82367_g1_i2	1026	-122.43	153	-21.24	2264912	22	2666
fru-miR-16	c115810_g1_i3	1026	-120.07	151	-20.44	2306183	22	9257
fru-miR-15a	c142865_g2_i3	1027	-142.56	152	-23.08	2269607	22	5644
fru-miR-16	c107740_g1_i1	1027	-126.41	153	-24.78	2288136	22	5569
fru-miR-15a	c120137_g1_i1	1028	-134.65	160	-21.69	2271792	22	4101
fru-miR-15a	c143751_g2_i10	1028	-151.01	152	-24.27	2274307	22	5692
fru-miR-15a	c143751_g2_i6	1028	-151.01	152	-24.27	2281845	22	5928
fru-miR-199	c144161_g1_i7	1029	-146.71	160	-32.81	695686	23	14716
fru-miR-103	c141035_g1_i2	1029	-123.96	156	-21.62	1571738	23	15922
fru-miR-107	c141035_g1_i2	1029	-123.96	156	-21.62	1593505	23	15922
fru-miR-214	c142875_g1_i2	1030	-127.05	155	-23.84	1423659	21	11568
fru-miR-183	c142479_g3_i2	1030	-140.73	162	-22.85	2098799	23	9803
fru-miR-204a	c126164_g1_i1	1030	-140.69	159	-26.12	2236319	22	7901
fru-miR-181b	c138549_g1_i4	1031	-129.8	162	-21.93	1156364	22	10808
fru-miR-148	c132253_g1_i3	1032	-110.98	151	-17.98	706147	22	6815
fru-miR-138	c139251_g1_i7	1032	-145.28	156	-24.35	1996931	22	4823
fru-miR-15a	c140969_g1_i3	1032	-118.64	152	-19.05	2264589	22	12599
fru-miR-15a	c140969_g1_i4	1032	-118.64	152	-19.05	2266580	22	12641
fru-miR-15a	c140969_g1_i1	1032	-118.64	152	-19.05	2277102	22	12425
fru-miR-9	c141483_g4_i3	1033	-126.56	156	-23.17	205768	23	7369
fru-miR-103	c137047_g3_i4	1033	-128.93	156	-26.21	1579680	23	7564
fru-miR-107	c137047_g3_i4	1033	-128.93	156	-26.21	1601447	23	7564
fru-miR-15b	c101921_g1_i1	1033	-140.45	159	-24.82	2061349	22	8878
fru-miR-15a	c125909_g1_i4	1033	-126.22	157	-21.82	2277862	22	1967
fru-miR-9	c140969_g1_i3	1034	-119.17	159	-19.11	196724	23	12599
fru-miR-9	c140969_g1_i4	1034	-119.17	159	-19.11	198715	23	12641
fru-miR-9	c140969_g1_i1	1034	-119.17	159	-19.11	209237	23	12425
fru-miR-27b	c132034_g1_i1	1034	-138.92	157	-23.76	588152	22	5919
fru-miR-27b	c138448_g1_i1	1034	-133.78	152	-22.08	604304	22	8195
fru-miR-24-3p	c129018_g1_i2	1035	-128.17	156	-21.66	1828532	22	13337
fru-miR-16	c138260_g3_i2	1035	-121.65	155	-19.54	2301314	22	5316
fru-miR-181a-5p	c138448_g1_i1	1036	-144.67	156	-23.15	1192013	23	8195
fru-miR-16	c138568_g2_i4	1036	-135.73	157	-24.85	2305434	22	15271
fru-miR-138	c97918_g1_i2	1037	-135.81	156	-22.56	2001692	22	4004
fru-miR-152	c138329_g1_i4	1037	-119.07	161	-21.89	2259679	22	14524
fru-miR-138	c107914_g1_i1	1038	-141.43	152	-26.09	1981911	22	8823
fru-miR-15a	c139750_g1_i2	1038	-126.35	156	-20.82	2263810	22	9000
fru-miR-15a	c121456_g1_i1	1038	-142.19	157	-22.99	2264773	22	3912
fru-miR-15a	c139750_g1_i1	1038	-126.35	156	-20.82	2270532	22	9018
fru-miR-15a	c139750_g1_i4	1038	-126.35	156	-20.82	2273098	22	8985
fru-miR-138	c140201_g2_i10	1040	-155.08	157	-25.79	1983348	22	8581
fru-miR-138	c141254_g1_i9	1040	-142.63	167	-26.49	1989027	22	10087
fru-miR-138	c140201_g2_i9	1040	-155.08	157	-25.79	1998661	22	8617
fru-miR-16	c125038_g1_i1	1040	-116.28	158	-19.23	2295982	22	1926
fru-miR-27e	c132034_g1_i2	1041	-139.48	162	-26.14	1869112	22	5975
fru-miR-15a	c140167_g1_i3	1041	-130.59	163	-22.03	2271401	22	12892
fru-miR-16	c131498_g1_i2	1041	-120.67	155	-19.08	2298066	22	12635
fru-miR-16	c131498_g1_i1	1041	-120.67	155	-19.08	2305930	22	12743
fru-miR-15a	c133774_g1_i1	1042	-136.4	159	-24.1	2276528	22	9767
fru-miR-214	c140068_g2_i1	1043	-142.64	164	-27.47	1415699	21	4607
fru-miR-138	c140472_g6_i21	1043	-139.55	167	-23.69	1984300	22	8706
fru-miR-27b	c129328_g1_i2	1045	-143.28	167	-25.75	600038	22	3463
fru-miR-24-3p	c137136_g1_i2	1045	-163.07	163	-28.19	1829040	22	8586
fru-miR-24-3p	c137136_g1_i1	1045	-163.07	163	-28.19	1846055	22	8815
fru-miR-24-3p	c137136_g1_i5	1045	-163.07	163	-28.19	1846570	22	8628
fru-miR-15a	c138223_g1_i4	1045	-158.32	170	-27.46	2276517	22	7066
fru-miR-16	c143596_g3_i11	1045	-123.98	159	-19.39	2298893	22	6156
fru-miR-181b	c138448_g1_i1	1046	-140.86	160	-24.05	1170246	22	8195
fru-miR-15b	c127093_g1_i1	1046	-140.24	158	-26.79	2058457	22	4966
fru-miR-15a	c138329_g1_i4	1046	-151.57	161	-28.19	2281446	22	14524
fru-miR-214	c129018_g1_i2	1047	-155.22	163	-28.61	1414959	21	13337
fru-miR-214	c119638_g1_i1	1047	-161.55	162	-29.45	1434466	21	5285
fru-miR-375	c96729_g2_i1	1047	-131.86	155	-24.96	1881183	22	2133
fru-miR-27c	c138026_g1_i1	1047	-122.88	160	-19.09	1979413	21	5514
fru-miR-15a	c143992_g1_i8	1047	-129.77	172	-23.04	2264933	22	17315
fru-miR-15a	c143992_g1_i7	1047	-129.77	172	-23.04	2271209	22	17464
fru-miR-15a	c143992_g1_i10	1047	-129.77	172	-23.04	2271885	22	17180
fru-miR-15a	c143992_g1_i2	1047	-129.77	172	-23.04	2274368	22	17168
fru-miR-16	c140167_g1_i3	1047	-125.33	158	-21.82	2293168	22	12892
fru-miR-9	c119506_g1_i2	1048	-129.54	164	-20.45	216314	23	4994
fru-miR-138	c131733_g1_i4	1048	-147.14	166	-24.76	1994014	22	5197
fru-miR-138	c143128_g1_i2	1048	-130.54	160	-21.7	1999907	22	2656
fru-miR-138	c131733_g1_i1	1048	-147.14	166	-24.76	2001272	22	5134
fru-miR-15a	c107740_g1_i1	1048	-135.93	159	-26.67	2266369	22	5569
[truncated: 4,433 more rows]

## Sheet: IGA(OVA) vs. PSR(OVA)
Supplementary file 6: MiRNA targets identified from BPGL differential expressed genes
miRBase ID	Unigene ID	Tot Score	Tot Energy	Max Score	Max Energy	Strand	Len1	Len2
dre-miR-203a-5p	c134590_g2_i2	1000	-130.22	151	-20.86	608910	24	14424
dre-miR-10d-5p	c140568_g1_i3	1001	-125.46	147	-19.05	2011328	23	6847
dre-miR-24	c140759_g1_i2	1003	-128.75	146	-22.64	3196268	22	10438
dre-miR-34a	c142009_g1_i3	1004	-131.89	155	-23.09	203303	22	11856
dre-miR-34a	c142009_g1_i7	1004	-131.89	155	-23.09	207635	22	13089
dre-miR-205-5p	c141035_g1_i2	1004	-141.53	149	-28.45	721543	22	15922
dre-miR-205-5p	c141035_g1_i3	1004	-141.53	149	-28.45	726073	22	15931
dre-miR-205-5p	c141035_g1_i1	1004	-141.53	149	-28.45	744285	22	16296
dre-miR-214	c142971_g3_i5	1004	-135.28	155	-25.6	902735	21	15175
dre-miR-214	c142971_g3_i6	1004	-135.28	155	-25.6	915207	21	15274
dre-miR-214	c142971_g3_i4	1004	-135.28	155	-25.6	928195	21	15322
dre-miR-204-3p	c141035_g1_i2	1005	-149.05	150	-28.61	690446	22	15922
dre-miR-204-3p	c141035_g1_i3	1005	-149.05	150	-28.61	694976	22	15931
dre-miR-204-3p	c141035_g1_i1	1005	-149.05	150	-28.61	713188	22	16296
dre-let-7c-5p	c133592_g1_i3	1005	-132.12	146	-26.81	1473504	22	8463
dre-let-7c-5p	c133592_g1_i2	1005	-132.12	146	-26.81	1481154	22	8677
dre-miR-16a	c139750_g1_i3	1005	-109.76	150	-19.55	2185784	22	8880
dre-miR-17a-2-3p	c115810_g1_i3	1005	-155.59	150	-29.4	2392858	23	9257
dre-miR-19b-5p	c138470_g2_i4	1005	-109.83	153	-18.8	2656279	22	10391
dre-miR-7a	c130488_g1_i2	1006	-126.49	148	-21.79	44665	23	5010
dre-miR-7a	c130488_g1_i3	1006	-126.49	148	-21.79	46009	23	5184
dre-miR-214	c138875_g3_i7	1006	-138.59	153	-24.53	916785	21	6190
dre-miR-17a-3p	c138329_g1_i5	1006	-130.42	150	-23.92	2333074	22	14539
dre-miR-19d-5p	c140167_g1_i2	1006	-148.92	151	-27.56	2771952	24	13004
dre-miR-22b-3p	c121650_g1_i2	1006	-133.41	152	-26.62	3037545	22	4828
dre-miR-9-5p	c143992_g2_i1	1007	-116.88	147	-20.16	1785405	23	12600
dre-miR-16c-5p	c139642_g4_i2	1007	-114.58	147	-17.48	2253728	22	1039
dre-miR-16c-5p	c101138_g1_i3	1007	-122.26	148	-21.07	2254532	22	2862
dre-miR-16c-5p	c137346_g3_i3	1007	-113.91	150	-19.24	2259033	22	4350
dre-miR-17a-2-3p	c140951_g1_i4	1007	-140.66	151	-25.68	2369974	23	8223
dre-miR-22a-5p	c130033_g1_i1	1007	-117.31	150	-25.55	2929263	22	5883
dre-miR-15a-5p	c142786_g1_i3	1008	-136.7	148	-22.9	2063236	22	10709
dre-miR-204-3p	c142586_g4_i1	1009	-147.53	150	-26.93	690047	22	12109
dre-miR-214	c133560_g1_i3	1009	-122.5	153	-21.18	918737	21	14693
dre-miR-214	c133560_g1_i2	1009	-122.5	153	-21.18	925591	21	14202
dre-miR-15a-5p	c123068_g1_i1	1009	-114.55	146	-18.92	2070002	22	8353
dre-miR-16a	c139642_g4_i2	1009	-108.29	147	-18.27	2191534	22	1039
dre-miR-16b	c139642_g4_i2	1009	-112.48	147	-17.48	2222631	22	1039
dre-miR-17a-2-3p	c134770_g1_i2	1010	-127.56	154	-22.35	2366787	23	3689
dre-miR-183-5p	c140509_g2_i3	1011	-134.5	152	-21.83	349226	23	9876
dre-miR-183-5p	c140509_g2_i6	1011	-134.5	152	-21.83	350619	23	9968
dre-miR-9-5p	c142222_g5_i3	1011	-113.98	149	-19.42	1802955	23	10584
dre-miR-214	c141687_g7_i4	1012	-155.35	151	-27.64	907827	21	4595
dre-miR-214	c141687_g7_i7	1012	-155.35	151	-27.64	911497	21	5113
dre-miR-15a-5p	c140361_g1_i3	1012	-124.24	157	-20.63	2079465	22	7847
dre-miR-17a-2-3p	c140044_g3_i16	1012	-139.89	152	-26.75	2381773	23	13669
dre-miR-20a-3p	c124489_g1_i3	1012	-139.2	153	-22.47	2864956	22	3410
dre-miR-214	c142017_g1_i3	1013	-141.19	154	-22.63	917451	21	4735
dre-miR-217	c134590_g2_i2	1013	-148.57	152	-25.19	982074	22	14424
dre-miR-203a-5p	c132604_g1_i1	1014	-112.85	157	-17.23	611569	24	5742
dre-miR-204-5p	c129413_g1_i1	1015	-133.09	150	-23.86	657489	22	5021
dre-miR-22b-5p	c136470_g1_i1	1015	-118.55	155	-18.96	3012630	22	12129
dre-miR-24	c133740_g1_i1	1015	-147.89	157	-25.05	3187933	22	7853
dre-miR-10a-5p	c140568_g1_i8	1016	-134.15	151	-24.93	88059	22	6793
dre-miR-10a-5p	c140568_g1_i4	1016	-134.15	151	-24.93	91549	22	7005
dre-miR-204-3p	c140499_g6_i7	1016	-156.1	154	-26.96	709631	22	5879
dre-miR-222a-5p	c140320_g1_i3	1016	-135.18	158	-22.32	1092420	23	10608
dre-miR-222a-5p	c133560_g1_i3	1016	-132.73	151	-26.61	1105319	23	14693
dre-miR-222a-5p	c142515_g1_i2	1016	-137.08	153	-24.29	1113364	23	14310
dre-miR-214	c139886_g1_i4	1017	-134.69	150	-23.16	912929	21	8357
dre-miR-22a-5p	c142842_g3_i1	1017	-117.7	151	-19.02	2946642	22	9074
dre-miR-24	c137700_g1_i3	1017	-140.63	155	-21.99	3197368	22	6278
dre-miR-205-3p	c137825_g4_i2	1018	-116.2	156	-21.52	747900	22	5882
dre-miR-214	c136575_g1_i2	1018	-135.61	156	-29.64	909124	21	8496
dre-miR-214	c136575_g1_i3	1018	-135.61	156	-29.64	914383	21	8399
dre-miR-214	c144082_g2_i4	1018	-145.33	152	-27.21	915440	21	6337
dre-miR-214	c136575_g1_i4	1018	-135.61	156	-29.64	918674	21	8515
dre-miR-214	c142831_g3_i1	1018	-135.65	153	-23.83	929134	21	15923
dre-miR-17a-3p	c142736_g1_i1	1018	-134.31	155	-25.63	2340464	22	6125
dre-miR-22b-5p	c138570_g2_i4	1018	-122.06	158	-19.61	2993622	22	10112
dre-miR-22b-5p	c138570_g2_i5	1018	-122.06	158	-19.61	3009785	22	10238
dre-miR-22b-5p	c138570_g2_i2	1018	-122.06	158	-19.61	3015593	22	10732
dre-miR-34a	c141035_g1_i2	1019	-147.74	155	-24.78	192894	22	15922
dre-miR-34a	c141035_g1_i3	1019	-147.74	155	-24.78	197424	22	15931
dre-miR-34a	c141035_g1_i1	1019	-147.74	155	-24.78	215636	22	16296
dre-miR-183-5p	c142378_g1_i3	1019	-121.23	157	-21.13	357977	23	14655
dre-miR-183-5p	c142378_g1_i8	1019	-121.23	157	-21.13	363525	23	14547
dre-miR-15a-5p	c133702_g1_i3	1019	-112.12	152	-18.3	2054011	22	5610
dre-miR-17a-2-3p	c140884_g1_i1	1019	-128.01	154	-19.82	2380985	23	9673
dre-miR-22a-5p	c138329_g1_i5	1019	-117.05	155	-20.82	2923917	22	14539
dre-miR-22b-5p	c138329_g1_i5	1019	-122.02	159	-22.57	2986111	22	14539
dre-miR-24	c140069_g1_i2	1019	-141.03	155	-23.42	3195645	22	9658
dre-miR-10b-3p	c138346_g1_i8	1020	-135.44	156	-23.48	174225	22	8170
dre-miR-203a-5p	c136699_g1_i2	1020	-121.18	153	-20.3	612033	24	9373
dre-miR-222a-5p	c136200_g2_i2	1020	-133.9	152	-21.86	1089748	23	7476
dre-miR-222a-5p	c136200_g2_i7	1020	-133.9	152	-21.86	1094428	23	7669
dre-miR-222a-5p	c136200_g2_i1	1020	-133.9	152	-21.86	1113327	23	7521
dre-let-7d-5p	c141035_g1_i2	1020	-130.27	158	-21.84	1530065	22	15922
dre-let-7d-5p	c141035_g1_i3	1020	-130.27	158	-21.84	1534595	22	15931
dre-let-7d-5p	c141035_g1_i1	1020	-130.27	158	-21.84	1552807	22	16296
dre-miR-15a-5p	c134476_g1_i2	1020	-144.81	155	-27.72	2064425	22	7446
dre-miR-15b-5p	c124489_g1_i2	1020	-136.43	152	-22.69	2127303	22	5268
dre-miR-16c-5p	c140855_g2_i16	1020	-126.09	152	-22.72	2250354	22	10189
dre-miR-17a-2-3p	c136964_g1_i4	1020	-133.74	154	-25.93	2378338	23	6162
dre-miR-17a-2-3p	c136964_g1_i2	1020	-133.74	154	-25.93	2391803	23	6204
dre-miR-222a-5p	c144182_g2_i5	1021	-150.17	161	-25.82	1092006	23	8977
dre-miR-222a-5p	c144182_g2_i2	1021	-150.17	161	-25.82	1104348	23	10675
dre-let-7d-5p	c133592_g1_i3	1021	-138.86	152	-29.19	1535698	22	8463
dre-let-7d-5p	c133592_g1_i2	1021	-138.86	152	-29.19	1543348	22	8677
dre-miR-16a	c137481_g4_i4	1022	-126.64	150	-21.99	2200438	22	5621
dre-miR-16b	c137481_g4_i4	1022	-129.62	150	-22.22	2231535	22	5621
dre-miR-16b	c144161_g1_i4	1022	-116.54	154	-19.38	2232450	22	14716
dre-miR-17a-2-3p	c142875_g1_i3	1022	-130.46	153	-21.78	2384009	23	14551
dre-miR-24	c133547_g3_i2	1022	-142.73	158	-24.52	3175091	22	8226
dre-miR-205-5p	c132831_g1_i3	1023	-145.61	163	-27.46	719288	22	4641
dre-miR-205-5p	c132831_g1_i1	1023	-145.61	163	-27.46	723151	22	4509
dre-miR-205-5p	c132831_g1_i2	1023	-145.61	163	-27.46	734136	22	4653
dre-miR-16c-5p	c139145_g3_i2	1023	-112.8	155	-20.96	2240530	22	10090
dre-miR-16c-5p	c139145_g3_i3	1023	-112.8	155	-20.96	2264583	22	11221
dre-miR-34a	c141413_g1_i3	1024	-148.55	162	-31.84	195365	22	7361
dre-miR-34a	c141413_g1_i1	1024	-148.55	162	-31.84	215884	22	6575
dre-miR-214	c142586_g4_i1	1024	-150.42	159	-24.1	907726	21	12109
dre-miR-221-5p	c144165_g1_i3	1024	-131.78	157	-22.74	1039459	26	15603
dre-miR-16b	c132848_g1_i3	1024	-120.85	150	-23.37	2225230	22	6400
dre-miR-21	c138907_g1_i4	1024	-132.04	158	-21.98	2903963	23	12870
dre-miR-21	c138907_g1_i3	1024	-132.04	158	-21.98	2914561	23	12903
dre-miR-21	c138907_g1_i1	1024	-132.04	158	-21.98	2918109	23	12957
dre-miR-20a-3p	c142875_g1_i2	1025	-129.01	158	-23.67	2873432	22	11568
dre-miR-22a-5p	c138377_g1_i4	1025	-124.89	163	-22.16	2943203	22	5782
dre-miR-22b-5p	c132897_g1_i1	1025	-122.99	156	-21.4	3000251	22	8280
dre-miR-222a-5p	c143992_g1_i3	1026	-116.89	161	-20.33	1094535	23	16666
dre-miR-15a-5p	c135850_g1_i4	1026	-121.37	160	-23.14	2070049	22	3736
dre-miR-16a	c135971_g1_i4	1026	-120.4	154	-19.25	2198434	22	5855
dre-miR-16b	c140855_g2_i16	1026	-131.35	156	-23.65	2219257	22	10189
dre-miR-16b	c115810_g1_i3	1026	-120.07	151	-20.44	2237373	22	9257
dre-miR-22b-5p	c131125_g2_i2	1026	-113.07	152	-20.21	3005238	22	3019
dre-miR-27a-3p	c132034_g1_i1	1026	-143.81	157	-25.92	3421269	22	5919
dre-miR-17a-3p	c142831_g3_i1	1027	-124.89	154	-23.88	2359596	22	15923
dre-miR-17a-2-3p	c138107_g2_i3	1027	-142.51	157	-24.96	2366882	23	5126
dre-miR-17a-2-3p	c138107_g2_i5	1027	-142.51	157	-24.96	2380354	23	5078
dre-miR-22b-5p	c142222_g5_i3	1027	-135.52	171	-24.07	3015738	22	10584
dre-miR-204-3p	c141321_g1_i1	1028	-143.75	156	-25.61	685055	22	16276
dre-miR-15a-5p	c119907_g1_i2	1028	-119.02	154	-22.22	2063569	22	7473
dre-miR-17a-2-3p	c141666_g1_i5	1028	-153.5	154	-26.21	2376133	23	5609
dre-miR-17a-2-3p	c141666_g1_i3	1028	-153.5	154	-26.21	2384738	23	5690
dre-miR-17a-2-3p	c141666_g1_i2	1028	-153.5	154	-26.21	2393473	23	6328
dre-miR-20a-3p	c142808_g2_i8	1028	-128.13	153	-23.44	2867550	22	13201
dre-miR-20a-3p	c143992_g2_i1	1028	-124.03	159	-21.69	2873800	22	12600
dre-miR-199-5p	c144161_g1_i4	1029	-146.71	160	-32.81	522115	23	14716
dre-miR-214	c121917_g1_i1	1029	-131.23	152	-28.4	902029	21	14866
dre-miR-9-5p	c136987_g1_i1	1029	-124.44	157	-21.64	1799540	23	7834
dre-miR-15a-5p	c138583_g1_i2	1029	-133.84	153	-25.84	2055153	22	6294
dre-miR-17a-2-3p	c142176_g1_i3	1029	-138.84	155	-23.6	2386645	23	8747
dre-miR-19d-5p	c136824_g1_i10	1029	-154.78	156	-27.39	2783965	24	3229
dre-miR-20a-3p	c140895_g1_i3	1029	-126.11	158	-21.04	2865869	22	3271
dre-miR-204-5p	c126164_g1_i1	1030	-140.69	159	-26.12	675939	22	7901
dre-miR-214	c136637_g1_i1	1030	-144.77	152	-24.67	910862	21	4464
dre-miR-214	c142875_g1_i2	1030	-127.05	155	-23.84	914321	21	11568
dre-miR-214	c136133_g1_i2	1030	-156.36	161	-29.12	929546	21	11235
dre-miR-16b	c139145_g3_i2	1030	-115.78	155	-20.96	2209433	22	10090
dre-miR-16b	c140315_g2_i2	1030	-118.42	164	-19.49	2211087	22	5388
dre-miR-16b	c139145_g3_i3	1030	-115.78	155	-20.96	2233486	22	11221
dre-miR-17a-2-3p	c143590_g3_i8	1030	-130.55	156	-25.7	2366831	23	7691
dre-miR-20a-3p	c140176_g7_i11	1030	-125.14	154	-19.01	2868586	22	6260
dre-miR-20a-3p	c140176_g7_i2	1030	-125.14	154	-19.01	2879050	22	5791
dre-miR-20a-3p	c140176_g7_i6	1030	-125.14	154	-19.01	2891141	22	6194
dre-miR-22b-5p	c78607_g1_i1	1030	-118.88	159	-18.35	2988699	22	3096
dre-miR-25-5p	c133933_g2_i2	1030	-159.84	156	-25.63	3210561	23	6151
dre-miR-181b-5p	c138549_g1_i4	1031	-129.8	162	-21.93	221474	22	10808
dre-miR-430a-3p	c144165_g1_i3	1031	-120.07	155	-20.95	1194944	22	15603
dre-miR-15a-5p	c144103_g5_i3	1031	-117.79	159	-17.96	2077492	22	15607
dre-miR-15b-5p	c134559_g1_i2	1031	-132.37	154	-22.16	2124702	22	8014
dre-miR-17a-3p	c142808_g2_i8	1031	-147.91	163	-28.89	2338901	22	13201
dre-miR-17a-3p	c141666_g1_i5	1031	-152.97	154	-27.48	2345036	22	5609
dre-miR-17a-3p	c141666_g1_i3	1031	-152.97	154	-27.48	2353641	22	5690
dre-miR-17a-3p	c141666_g1_i2	1031	-152.97	154	-27.48	2362376	22	6328
dre-miR-24	c142515_g1_i2	1031	-161.44	154	-28.31	3196863	22	14310
dre-miR-199-3p	c141457_g1_i2	1032	-137.4	161	-27.02	543668	22	12341
dre-miR-199-3p	c141457_g1_i5	1032	-137.4	161	-27.02	546961	22	12386
dre-miR-205-3p	c135885_g4_i6	1032	-130.83	159	-22.24	760607	22	9921
dre-miR-15a-5p	c141777_g1_i11	1032	-133.17	159	-21.64	2059921	22	10567
dre-miR-16a	c142176_g1_i1	1032	-120.37	158	-21.53	2199626	22	8122
dre-miR-16c-5p	c140143_g1_i3	1032	-116.76	159	-18.75	2240677	22	12715
dre-miR-17a-3p	c140588_g1_i6	1032	-138.3	157	-24.13	2347830	22	7192
dre-miR-17a-2-3p	c142736_g1_i4	1032	-140.26	160	-27.81	2391987	23	6245
dre-miR-22a-5p	c138922_g1_i1	1032	-124.19	156	-19.68	2950521	22	7810
dre-miR-199-5p	c142147_g1_i7	1033	-150.27	154	-33.32	499820	23	18936
dre-miR-205-3p	c140143_g1_i3	1033	-124.5	159	-20.64	748021	22	12715
dre-miR-9-5p	c142147_g1_i7	1033	-116.48	169	-19.94	1774797	23	18936
dre-miR-17a-2-3p	c142292_g1_i2	1033	-141.49	165	-24.3	2365086	23	5949
dre-miR-17a-2-3p	c140995_g7_i1	1033	-137.96	159	-23.64	2377357	23	7240
dre-miR-22b-5p	c142875_g1_i2	1033	-129.23	162	-22.34	2997820	22	11568
dre-miR-27b-3p	c142887_g7_i2	1033	-136.01	158	-23.37	3486020	22	6186
dre-miR-34a	c141509_g1_i6	1034	-144.4	156	-22.9	201893	22	12745
dre-miR-34a	c141509_g1_i3	1034	-144.4	156	-22.9	204240	22	12436
dre-miR-34a	c141509_g1_i4	1034	-144.4	156	-22.9	211461	22	12358
dre-miR-214	c138811_g1_i5	1034	-138.36	156	-24.84	920029	21	10293
dre-miR-9-5p	c140969_g1_i3	1034	-119.17	159	-19.11	1773662	23	12599
dre-miR-9-5p	c137119_g2_i4	1034	-118.61	156	-18.39	1782109	23	9509
dre-miR-9-5p	c140969_g1_i1	1034	-119.17	159	-19.11	1791563	23	12425
dre-miR-9-5p	c137119_g2_i2	1034	-118.61	156	-18.39	1798904	23	9410
dre-miR-15a-5p	c139750_g1_i3	1034	-127.17	151	-20.9	2061396	22	8880
dre-miR-27b-3p	c132034_g1_i1	1034	-138.92	157	-23.76	3483463	22	5919
dre-miR-15a-5p	c140848_g2_i2	1035	-123.86	155	-22.03	2067455	22	6356
dre-miR-15a-5p	c130997_g1_i2	1035	-134.14	159	-21.83	2071315	22	4882
dre-miR-16a	c141466_g1_i3	1035	-119.22	151	-20.77	2185821	22	10953
dre-miR-16b	c141466_g1_i3	1035	-120.8	151	-21	2216918	22	10953
dre-miR-16c-5p	c139944_g1_i1	1035	-120.68	154	-22.14	2264720	22	8116
dre-miR-20a-3p	c129753_g1_i1	1035	-138.32	158	-27.25	2860971	22	6488
dre-miR-20a-3p	c133560_g1_i2	1035	-135.65	152	-22.42	2884702	22	14202
dre-miR-22b-5p	c138568_g2_i2	1035	-129.57	156	-20.05	3004149	22	7468
dre-miR-27a-3p	c142975_g1_i1	1035	-114.81	154	-19.82	3431614	22	11738
dre-miR-183-5p	c143066_g1_i1	1036	-138.33	164	-28.21	347741	23	6391
dre-miR-15a-5p	c139944_g1_i1	1036	-135.71	153	-23.35	2078138	22	8116
dre-miR-15b-5p	c140167_g1_i2	1036	-119.31	155	-19.9	2118915	22	13004
dre-miR-15b-5p	c132848_g1_i4	1036	-119.74	155	-19.4	2123119	22	6057
dre-miR-15b-5p	c132848_g1_i3	1036	-119.74	155	-19.4	2131939	22	6400
dre-miR-15b-5p	c144103_g5_i3	1036	-129.04	160	-23.34	2139686	22	15607
dre-miR-15b-5p	c132848_g1_i1	1036	-119.74	155	-19.4	2142555	22	5428
dre-miR-16a	c140859_g2_i7	1036	-119.61	160	-21.68	2178582	22	4741
dre-miR-16c-5p	c138260_g3_i6	1036	-120.24	159	-22.34	2245867	22	10308
dre-miR-16c-5p	c140361_g1_i3	1036	-119.52	159	-20.72	2266047	22	7847
dre-miR-16c-5p	c138260_g3_i7	1036	-120.24	159	-22.34	2268271	22	10216
dre-miR-17a-3p	c140123_g3_i9	1036	-142.78	168	-26.37	2340901	22	10201
dre-miR-15b-5p	c137136_g1_i3	1037	-133.91	156	-24.54	2134262	22	8841
dre-miR-15b-5p	c140069_g1_i2	1037	-123.45	159	-20.95	2138347	22	9658
dre-miR-15b-5p	c137136_g1_i1	1037	-133.91	156	-24.54	2139758	22	8815
dre-miR-15b-5p	c137136_g1_i5	1037	-133.91	156	-24.54	2140540	22	8628
dre-miR-17a-2-3p	c140123_g3_i9	1037	-142.05	168	-26.97	2371998	23	10201
dre-miR-19d-5p	c142875_g1_i3	1037	-164.44	162	-29.7	2788270	24	14551
dre-miR-27d	c132034_g1_i1	1037	-133.24	157	-24.6	3576754	22	5919
dre-miR-181b-5p	c110040_g1_i1	1038	-129.43	162	-21.95	238073	22	6020
dre-miR-25-5p	c137189_g1_i2	1038	-168.62	155	-27.43	3209054	23	3465
dre-miR-15a-5p	c143791_g3_i1	1039	-123.82	158	-21.97	2074247	22	10270
dre-miR-17a-3p	c132376_g1_i1	1039	-142.03	159	-24.99	2357080	22	4293
dre-miR-17a-2-3p	c140588_g1_i6	1039	-141.01	162	-24.41	2378927	23	7192
dre-miR-22a-5p	c143992_g2_i1	1039	-113.76	171	-19.58	2935994	22	12600
dre-miR-25-5p	c141347_g1_i1	1039	-183.08	157	-29.5	3229482	23	9023
dre-miR-204-3p	c116210_g1_i3	1040	-151.05	157	-26.64	708244	22	1794
dre-miR-15b-5p	c138377_g2_i3	1040	-111.28	158	-17.43	2116720	22	5773
dre-miR-15b-5p	c138377_g2_i1	1040	-111.28	158	-17.43	2130584	22	5634
dre-miR-16b	c125038_g1_i1	1040	-116.28	158	-19.23	2222705	22	1926
dre-miR-25-5p	c130561_g1_i1	1040	-170.71	164	-28.61	3228630	23	2572
dre-miR-15a-5p	c132848_g1_i4	1041	-127.93	153	-19.95	2060925	22	6057
dre-miR-15a-5p	c132848_g1_i3	1041	-127.93	153	-19.95	2069745	22	6400
dre-miR-15a-5p	c132848_g1_i1	1041	-127.93	153	-19.95	2080361	22	5428
dre-miR-16c-5p	c137136_g1_i2	1041	-117.41	160	-21.63	2239840	22	8586
dre-miR-16c-5p	c137136_g1_i3	1041	-117.41	160	-21.63	2258650	22	8841
dre-miR-16c-5p	c137136_g1_i1	1041	-117.41	160	-21.63	2264146	22	8815
dre-miR-16c-5p	c137136_g1_i5	1041	-117.41	160	-21.63	2264928	22	8628
dre-miR-20a-3p	c121120_g1_i4	1041	-128.56	154	-25.11	2864830	22	5892
dre-miR-20a-3p	c142009_g1_i3	1041	-124.65	163	-23.31	2877645	22	11856
dre-miR-24	c137177_g1_i1	1041	-137.92	161	-23.72	3196950	22	5871
dre-miR-199-3p	c138570_g2_i3	1042	-114.76	158	-19.64	531891	22	11243
dre-miR-199-3p	c138570_g2_i4	1042	-114.76	158	-19.64	536959	22	10112
dre-miR-199-3p	c138570_g2_i5	1042	-114.76	158	-19.64	553122	22	10238
dre-miR-204-3p	c101589_g1_i2	1042	-152.28	163	-26.59	709750	22	5458
dre-miR-15a-5p	c143992_g1_i10	1042	-125.02	176	-23.69	2063895	22	17180
dre-miR-15b-5p	c142586_g3_i10	1042	-120.75	158	-19.13	2119122	22	11052
dre-miR-17a-2-3p	c140734_g1_i2	1042	-154.37	165	-27.81	2376296	23	3816
dre-miR-17a-2-3p	c132063_g1_i2	1042	-150.02	161	-24.01	2377580	23	11216
dre-miR-17a-2-3p	c132063_g1_i1	1042	-150.02	161	-24.01	2386441	23	11228
dre-miR-22b-3p	c142147_g1_i7	1042	-150.57	162	-25.74	3018677	22	18936
dre-miR-214	c138346_g1_i10	1043	-151.6	163	-27.68	910407	21	7963
dre-miR-214	c138346_g1_i8	1043	-151.6	163	-27.68	920553	21	8170
dre-miR-214	c138346_g1_i2	1043	-151.6	163	-27.68	924469	21	7948
dre-miR-16a	c142808_g2_i8	1043	-123.66	154	-20.99	2183416	22	13201
dre-miR-430b-3p	c138946_g5_i3	1044	-121.87	159	-20.14	1272792	23	4905
dre-miR-15b-5p	c139750_g1_i3	1044	-122.18	154	-20.95	2123590	22	8880
dre-miR-17a-3p	c140734_g1_i5	1044	-147.72	165	-27.98	2340444	22	5730
dre-miR-17a-3p	c141457_g1_i2	1044	-150.77	163	-26.76	2347294	22	12341
dre-miR-17a-3p	c141457_g1_i5	1044	-150.77	163	-26.76	2350587	22	12386
dre-miR-17a-3p	c142563_g4_i3	1044	-149.87	159	-26.12	2350624	22	10050
dre-miR-17a-2-3p	c138759_g1_i3	1044	-154.85	162	-26.11	2385341	23	8028
dre-miR-25-5p	c140123_g3_i9	1044	-190.92	160	-30.26	3211617	23	10201
dre-miR-214	c135413_g3_i9	1045	-144.88	156	-23.07	920583	21	9095
dre-miR-16b	c99099_g1_i2	1045	-120.52	153	-20.14	2208512	22	8423
dre-miR-16b	c99099_g1_i1	1045	-120.52	153	-20.14	2238834	22	8348
dre-miR-24	c137136_g1_i2	1045	-163.07	163	-28.19	3172750	22	8586
dre-miR-24	c137136_g1_i3	1045	-163.07	163	-28.19	3191560	22	8841
dre-miR-24	c137136_g1_i1	1045	-163.07	163	-28.19	3197056	22	8815
dre-miR-24	c137136_g1_i5	1045	-163.07	163	-28.19	3197838	22	8628
dre-miR-181b-5p	c140760_g1_i3	1046	-125.86	159	-20.93	218026	22	4857
dre-miR-205-3p	c144724_g1_i1	1046	-118.63	159	-21.16	750891	22	10291
dre-miR-221-5p	c139838_g1_i2	1046	-126.35	171	-21.88	1038177	26	10548
dre-miR-221-5p	c139838_g1_i3	1046	-126.35	171	-21.88	1052326	26	10804
dre-miR-15a-5p	c140969_g1_i3	1046	-115.04	156	-17.96	2053535	22	12599
dre-miR-15a-5p	c140969_g1_i1	1046	-115.04	156	-17.96	2071436	22	12425
dre-miR-16a	c142878_g2_i4	1046	-112.25	162	-18.95	2197350	22	10328
dre-miR-16b	c142878_g2_i4	1046	-116.16	162	-18.95	2228447	22	10328
dre-miR-16c-5p	c140315_g2_i2	1046	-127.67	172	-23.55	2242184	22	5388
dre-miR-17a-3p	c136470_g1_i1	1046	-147.45	169	-27.66	2359593	22	12129
dre-miR-25-5p	c143482_g3_i7	1046	-177.12	154	-31.04	3221077	23	6776
dre-miR-25-5p	c143482_g3_i2	1046	-177.12	154	-31.04	3223556	23	7628
dre-miR-34a	c141321_g1_i1	1047	-156.26	170	-27.52	187503	22	16276
dre-miR-204-3p	c136133_g1_i1	1047	-140.43	158	-24.91	689604	22	5933
dre-miR-204-3p	c136133_g1_i2	1047	-140.43	158	-24.91	711867	22	11235
dre-miR-16b	c140167_g1_i2	1047	-125.33	158	-21.82	2212206	22	13004
dre-miR-17a-2-3p	c131995_g1_i1	1047	-148.53	165	-24.33	2363925	23	12919
dre-miR-19d-5p	c143936_g1_i9	1048	-173.03	157	-31.57	2781527	24	7795
dre-miR-19d-5p	c143936_g1_i1	1048	-173.03	157	-31.57	2782075	24	9110
dre-miR-19d-5p	c143936_g1_i3	1048	-173.03	157	-31.57	2795538	24	7908
dre-miR-20a-3p	c136964_g1_i4	1048	-140.11	157	-22.28	2875890	22	6162
dre-miR-20a-3p	c136964_g1_i2	1048	-140.11	157	-22.28	2889355	22	6204
dre-miR-214	c128725_g1_i2	1049	-152.53	166	-31.28	915470	21	1795
dre-miR-19b-5p	c132897_g1_i1	1049	-108.99	156	-16.88	2658184	22	8280
dre-miR-20a-3p	c143992_g1_i10	1049	-135.18	160	-28.93	2872417	22	17180
dre-miR-20a-3p	c143611_g1_i1	1049	-140.87	161	-24.51	2875027	22	13732
dre-miR-22a-5p	c142919_g1_i2	1049	-125.95	170	-22.88	2930538	22	6126
dre-miR-22a-5p	c142919_g1_i4	1049	-125.95	170	-22.88	2944498	22	7960
dre-miR-25-5p	c126920_g1_i1	1049	-177.89	160	-26.9	3226221	23	5420
dre-miR-7a	c121528_g1_i1	1050	-123.56	165	-21.51	44421	23	10793
dre-miR-7a	c121528_g1_i2	1050	-123.56	165	-21.51	56949	23	10665
dre-miR-205-5p	c132897_g1_i1	1050	-129.94	159	-21.12	730170	22	8280
dre-miR-15a-5p	c140143_g1_i3	1050	-137.36	160	-23.78	2054095	22	12715
dre-miR-15a-5p	c141455_g1_i4	1050	-127.22	159	-20.29	2059389	22	7105
dre-miR-15a-5p	c139642_g4_i2	1050	-131.5	159	-20.75	2067146	22	1039
dre-miR-15a-5p	c117349_g1_i3	1050	-140.23	171	-26.99	2071033	22	6054
dre-miR-20a-3p	c138193_g1_i1	1050	-132.33	153	-22.95	2875123	22	6937
dre-miR-24	c142586_g3_i10	1050	-153.87	158	-27.21	3176420	22	11052
dre-miR-214	c142808_g2_i8	1051	-152.39	161	-28.62	908439	21	13201
dre-miR-15b-5p	c135971_g1_i4	1051	-129.75	159	-22.17	2136240	22	5855
dre-miR-16c-5p	c127691_g1_i4	1051	-129.89	158	-22.37	2253275	22	6931
dre-miR-16c-5p	c142878_g2_i1	1051	-114.63	158	-17.96	2262948	22	11272
dre-miR-16c-5p	c127691_g1_i1	1051	-129.89	158	-22.37	2263472	22	7018
dre-miR-22b-5p	c138549_g1_i4	1051	-127.33	161	-22.25	2989107	22	10808
dre-miR-16c-5p	c138377_g2_i3	1052	-118.4	156	-18.79	2241108	22	5773
dre-miR-16c-5p	c138377_g2_i1	1052	-118.4	156	-18.79	2254972	22	5634
dre-miR-17a-3p	c129117_g1_i3	1052	-144.11	170	-31.11	2340009	22	8307
dre-miR-15b-5p	c142861_g1_i4	1053	-116.13	155	-20.04	2126634	22	15464
dre-miR-15b-5p	c142861_g1_i2	1053	-116.13	155	-20.04	2143640	22	15416
dre-miR-7b	c105570_g1_i1	1054	-116.49	171	-18.59	9364	21	3942
dre-miR-34a	c142861_g1_i4	1054	-155.53	164	-26.37	198620	22	15464
dre-miR-34a	c142861_g1_i2	1054	-155.53	164	-26.37	215626	22	15416
dre-miR-204-5p	c126170_g1_i2	1055	-128.87	157	-26.47	679484	22	5817
dre-miR-15b-5p	c140143_g1_i3	1055	-118.78	158	-20.69	2116289	22	12715
dre-miR-15b-5p	c130997_g1_i2	1055	-127.71	159	-22.83	2133509	22	4882
dre-miR-27a-3p	c140959_g3_i1	1055	-121.14	157	-18.76	3423065	22	6213
dre-miR-430c-3p	c138946_g5_i3	1056	-127.16	166	-20.91	1334986	22	4905
dre-miR-15a-5p	c136133_g1_i2	1056	-132.16	162	-22.93	2080135	22	11235
dre-miR-17a-3p	c141957_g1_i6	1056	-153.38	176	-28.05	2349546	22	6453
dre-miR-22b-3p	c142831_g3_i1	1056	-132.33	162	-21.71	3043730	22	15923
dre-miR-16a	c142995_g1_i3	1057	-115.16	168	-19.16	2198330	22	10626
dre-miR-20a-3p	c139050_g3_i1	1057	-143.25	166	-23.52	2869679	22	6273
dre-miR-22b-5p	c139027_g1_i7	1057	-119.73	164	-18.51	3011998	22	6128
dre-miR-22b-5p	c139027_g1_i3	1057	-119.73	164	-18.51	3014287	22	6116
dre-miR-25-5p	c115579_g3_i1	1059	-188.82	167	-34.94	3233881	23	3266
dre-miR-15a-5p	c142808_g2_i8	1061	-121.07	162	-22.76	2059028	22	13201
dre-miR-214	c142830_g5_i12	1062	-177.61	166	-32.2	901988	21	7428
dre-miR-214	c142830_g5_i16	1062	-177.61	166	-32.2	907257	21	7570
dre-miR-214	c142830_g5_i14	1062	-177.61	166	-32.2	923800	21	7512
dre-miR-214	c142830_g5_i1	1062	-177.61	166	-32.2	927654	21	7616
dre-miR-15b-5p	c127691_g1_i4	1062	-133.67	169	-25.92	2128887	22	6931
dre-miR-15b-5p	c127691_g1_i1	1062	-133.67	169	-25.92	2139084	22	7018
dre-miR-15a-5p	c142176_g1_i3	1063	-147.99	163	-27.08	2075675	22	8747
dre-miR-17a-2-3p	c133499_g1_i3	1063	-141.16	161	-24.15	2370672	23	6215
dre-miR-20b-3p	c142938_g2_i7	1063	-128.35	169	-21.05	2440485	23	3846
dre-miR-20b-3p	c142938_g2_i4	1063	-128.35	169	-21.05	2445211	23	7393
dre-miR-17a-2-3p	c140135_g2_i3	1064	-149.16	161	-25.03	2375636	23	5114
dre-miR-20b-3p	c143992_g1_i3	1065	-130.93	168	-21.5	2431706	23	16666
dre-miR-20a-3p	c140135_g2_i3	1065	-141.72	163	-25.02	2873188	22	5114
dre-miR-214	c136311_g1_i3	1066	-156.93	160	-29.51	905827	21	4157
dre-miR-221-3p	c142147_g1_i7	1066	-133.25	168	-24.1	1059566	23	18936
dre-miR-17a-3p	c140135_g2_i3	1066	-149.15	166	-25.21	2344539	22	5114
dre-let-7a	c143550_g1_i1	1067	-135.41	166	-22.37	1428010	22	7488
dre-let-7g	c143550_g1_i1	1067	-134.14	174	-22.65	1676786	22	7488
dre-miR-15a-5p	c122537_g1_i1	1067	-135.07	159	-23.02	2066609	22	5270
dre-miR-15b-5p	c135782_g3_i5	1067	-119.25	158	-20.28	2133771	22	4796
dre-miR-17a-2-3p	c129117_g1_i3	1068	-148.89	175	-31.38	2371106	23	8307
dre-miR-205-3p	c137197_g1_i1	1069	-126.33	180	-23.65	747679	22	14775
dre-miR-214	c143862_g4_i2	1069	-182.75	170	-33.54	905286	21	4486
dre-miR-20a-3p	c138737_g1_i3	1069	-132.95	162	-24.59	2877637	22	5585
dre-miR-20a-3p	c142219_g2_i3	1069	-153.38	162	-26.04	2886858	22	9097
dre-miR-25-5p	c139919_g3_i1	1069	-184.76	174	-32.02	3204105	23	4158
dre-miR-16b	c142995_g1_i4	1070	-123.9	168	-25.43	2217444	22	11523
dre-miR-199-5p	c129980_g1_i1	1071	-132.3	167	-24.61	509940	23	9837
dre-miR-16a	c136375_g2_i4	1071	-135.34	176	-23.19	2191542	22	7650
dre-miR-16a	c136375_g2_i1	1071	-135.34	176	-23.19	2193071	22	7704
dre-miR-15b-5p	c140969_g1_i3	1072	-126.81	171	-22.73	2115729	22	12599
dre-miR-15b-5p	c140969_g1_i1	1072	-126.81	171	-22.73	2133630	22	12425
dre-miR-15b-5p	c140859_g2_i7	1073	-139.6	163	-26.1	2116388	22	4741
dre-miR-27c-3p	c134026_g1_i5	1073	-133.49	161	-22.22	3574392	21	6829
dre-miR-16c-5p	c130465_g1_i7	1075	-122.43	162	-21.69	2248945	22	4635
dre-miR-16c-5p	c130465_g1_i5	1075	-122.43	162	-21.69	2265684	22	4455
dre-miR-24	c144182_g2_i5	1076	-174.8	175	-32.68	3175505	22	8977
dre-miR-24	c144182_g2_i2	1076	-174.8	175	-32.68	3187847	22	10675
dre-miR-24	c144182_g2_i3	1076	-174.8	175	-32.68	3189658	22	11038
dre-miR-27d	c134026_g1_i5	1076	-120.91	160	-18.73	3605489	22	6829
dre-miR-181b-5p	c140106_g3_i2	1079	-134.95	170	-23.86	226155	22	4967
dre-let-7c-5p	c143550_g1_i1	1079	-142.81	166	-25.31	1490204	22	7488
dre-let-7h	c143550_g1_i1	1083	-138.81	172	-25.1	1707883	22	7488
dre-miR-16c-5p	c141455_g1_i4	1086	-123.31	169	-20.01	2245971	22	7105
dre-miR-27b-3p	c134026_g1_i5	1090	-138.92	164	-24.5	3512198	22	6829
dre-miR-27a-3p	c134026_g1_i5	1091	-130.43	161	-20.66	3450004	22	6829
dre-miR-181a-5p	c141805_g1_i1	1092	-135.06	171	-26.31	859666	23	5966
dre-miR-181b-5p	c132415_g2_i6	1106	-125.34	176	-24.77	235143	22	6195
dre-miR-16c-5p	c137481_g4_i1	1132	-127.28	143	-16.96	2257043	22	5643
dre-miR-19b-5p	c126326_g2_i1	1136	-115.72	178	-21.22	2667340	22	1494
dre-miR-17a-3p	c141387_g3_i2	1142	-148.5	148	-22.6	2340777	22	8191
dre-miR-17a-3p	c141387_g3_i4	1142	-148.5	148	-22.6	2358362	22	5900
dre-miR-17a-2-3p	c142083_g1_i5	1145	-154.97	148	-23.65	2391820	23	4465
dre-miR-17a-3p	c128755_g1_i1	1150	-167.61	150	-25.28	2346048	22	6538
dre-miR-17a-2-3p	c134770_g1_i1	1151	-146.37	154	-22.35	2373730	23	4249
dre-miR-17a-2-3p	c134770_g1_i3	1151	-146.37	154	-22.35	2391924	23	4053
dre-miR-17a-2-3p	c137088_g1_i1	1154	-138.4	149	-21.13	2368638	23	4450
dre-miR-19b-5p	c136470_g1_i1	1154	-129.4	150	-18.62	2670563	22	12129
dre-miR-187	c142147_g1_i7	1155	-156.34	153	-24.48	406529	20	18936
dre-miR-17a-3p	c140884_g1_i1	1155	-143.87	152	-19.12	2349888	22	9673
dre-miR-22a-5p	c142590_g2_i2	1156	-135.36	158	-20.72	2944392	22	6167
dre-miR-214	c138568_g2_i3	1157	-155.84	149	-23.93	923390	21	8156
dre-miR-22a-3p	c138966_g2_i3	1157	-150.38	151	-21.39	2984375	22	11737
dre-miR-15a-5p	c133681_g1_i1	1159	-144.99	149	-22.99	2071870	22	5607
dre-miR-16c-5p	c144161_g1_i4	1159	-131.36	154	-19.46	2263547	22	14716
dre-miR-205-5p	c137328_g1_i1	1160	-156.55	156	-24.16	745289	22	9226
dre-miR-16c-5p	c140537_g8_i1	1160	-126.21	148	-18.86	2241422	22	5648
dre-miR-17a-3p	c136964_g1_i4	1160	-152.76	158	-25.66	2347241	22	6162
dre-miR-17a-3p	c136964_g1_i2	1160	-152.76	158	-25.66	2360706	22	6204
dre-miR-22b-5p	c138570_g2_i3	1160	-138.06	158	-19.61	2988554	22	11243
dre-miR-10a-5p	c140568_g1_i3	1163	-151.58	151	-24.93	83314	22	6847
dre-miR-199-5p	c141626_g1_i2	1164	-135.23	153	-21.24	519838	23	13230
dre-miR-16a	c137481_g4_i1	1164	-138.79	147	-19.64	2194849	22	5643
dre-miR-16b	c137481_g4_i1	1164	-142.06	147	-19.04	2225946	22	5643
dre-miR-430a-3p	c142147_g1_i7	1165	-124.79	151	-18.53	1183954	22	18936
dre-miR-15b-5p	c136986_g1_i2	1165	-128.26	158	-19.4	2142701	22	5911
dre-miR-222a-5p	c144182_g2_i3	1166	-172.8	161	-25.82	1106159	23	11038
dre-miR-15a-5p	c136986_g1_i2	1166	-139.06	156	-20.73	2080507	22	5911
dre-miR-15b-5p	c138346_g1_i10	1166	-132.6	149	-20.77	2123190	22	7963
dre-miR-15b-5p	c138346_g1_i8	1166	-132.6	149	-20.77	2133336	22	8170
dre-miR-15b-5p	c138346_g1_i2	1166	-132.6	149	-20.77	2137252	22	7948
dre-miR-16b	c135971_g1_i4	1166	-134.38	154	-18.53	2229531	22	5855
dre-miR-22a-5p	c133560_g1_i3	1166	-136.46	152	-18.95	2940042	22	14693
dre-miR-22a-5p	c133560_g1_i2	1166	-136.46	152	-18.95	2946896	22	14202
dre-miR-25-5p	c142350_g1_i2	1166	-219.51	162	-33.9	3212910	23	7503
dre-miR-25-5p	c142350_g1_i6	1166	-219.51	162	-33.9	3213016	23	7611
dre-miR-25-5p	c142350_g1_i1	1166	-219.51	162	-33.9	3219987	23	7999
dre-miR-25-5p	c142350_g1_i5	1166	-219.51	162	-33.9	3223929	23	7656
dre-miR-25-5p	c142350_g1_i4	1166	-219.51	162	-33.9	3226415	23	7458
dre-miR-22b-5p	c139264_g1_i1	1167	-155.44	159	-26.76	3012127	22	14411
dre-miR-16a	c142147_g1_i7	1168	-133.23	155	-20.98	2179058	22	18936
dre-miR-16b	c142147_g1_i7	1168	-136.7	155	-20.2	2210155	22	18936
dre-miR-17a-2-3p	c121120_g1_i1	1168	-165.15	161	-24.39	2387529	23	3212
dre-miR-22b-5p	c137197_g1_i1	1168	-132.16	154	-19.59	2986663	22	14775
dre-miR-24	c138377_g2_i3	1168	-175.1	157	-28.91	3174018	22	5773
dre-miR-24	c138377_g2_i1	1168	-175.1	157	-28.91	3187882	22	5634
dre-miR-214	c141466_g1_i3	1169	-158.67	152	-24.46	910844	21	10953
dre-let-7i	c141035_g1_i2	1169	-169.07	152	-28.9	1716647	22	15922
dre-let-7i	c141035_g1_i3	1169	-169.07	152	-28.9	1721177	22	15931
dre-let-7i	c141035_g1_i1	1169	-169.07	152	-28.9	1739389	22	16296
dre-miR-17a-3p	c142875_g1_i3	1169	-145.48	155	-21.56	2352912	22	14551
dre-miR-20a-3p	c140895_g1_i4	1169	-143.58	158	-21.04	2878745	22	9400
dre-miR-24	c142586_g4_i1	1169	-161.13	152	-24.69	3177807	22	12109
dre-miR-214	c140568_g1_i3	1170	-153.28	151	-21.56	922933	21	6847
dre-miR-214	c140568_g1_i8	1170	-153.28	151	-21.56	927678	21	6793
dre-miR-214	c140568_g1_i4	1170	-153.28	151	-21.56	931168	21	7005
dre-miR-16a	c142176_g1_i3	1170	-135.26	158	-21.53	2200063	22	8747
dre-miR-16a	c142515_g1_i2	1170	-132.66	159	-19.34	2201759	22	14310
dre-miR-16b	c141696_g2_i5	1170	-133.01	153	-21.76	2231039	22	8085
dre-miR-16b	c142515_g1_i2	1170	-126.8	159	-18.12	2232856	22	14310
dre-miR-214	c137177_g1_i1	1171	-142.86	163	-26.09	926869	21	5871
dre-miR-15a-5p	c135850_g1_i5	1172	-138.55	160	-23.14	2070281	22	3922
dre-miR-27c-3p	c142009_g1_i5	1172	-143.52	159	-23.78	3548183	21	13098
dre-miR-27c-3p	c142009_g1_i3	1172	-143.52	159	-23.78	3561779	21	11856
dre-miR-27c-3p	c142009_g1_i7	1172	-143.52	159	-23.78	3566111	21	13089
dre-miR-17a-3p	c138193_g1_i1	1173	-155.8	152	-25.14	2346474	22	6937
dre-miR-17a-2-3p	c142292_g1_i9	1173	-160.8	165	-24.3	2372999	23	6096
dre-miR-20a-3p	c144003_g4_i1	1173	-154.59	156	-22.2	2879263	22	15604
dre-miR-27a-3p	c132034_g1_i2	1173	-164.49	157	-25.92	3447721	22	5975
dre-miR-214	c140167_g1_i2	1174	-153.07	155	-21.45	906132	21	13004
dre-miR-214	c142875_g1_i3	1174	-145.74	155	-23.84	922450	21	14551
dre-miR-222a-5p	c144161_g1_i4	1174	-150.61	156	-23.77	1112958	23	14716
dre-miR-15a-5p	c134476_g1_i3	1174	-165.01	155	-27.72	2073295	22	7617
dre-miR-17a-2-3p	c142808_g2_i8	1174	-170.22	158	-28.25	2369998	23	13201
dre-miR-17a-2-3p	c142736_g1_i1	1174	-160.81	160	-27.81	2371561	23	6125
dre-miR-24	c115942_g1_i1	1174	-177.69	160	-26.76	3175068	22	9676
dre-let-7b	c141035_g1_i2	1175	-159.41	166	-22.64	1436774	22	15922
dre-let-7b	c141035_g1_i3	1175	-159.41	166	-22.64	1441304	22	15931
dre-let-7b	c141035_g1_i1	1175	-159.41	166	-22.64	1459516	22	16296
dre-miR-16c-5p	c132598_g1_i1	1175	-138.8	155	-24.02	2269406	22	5656
dre-miR-204-5p	c144444_g1_i3	1176	-158.15	159	-28.57	679279	22	6124
dre-miR-16c-5p	c135971_g1_i4	1176	-140.25	154	-22.06	2260628	22	5855
dre-miR-17a-2-3p	c143611_g1_i1	1176	-158.42	158	-25.65	2377475	23	13732
dre-miR-34a	c121917_g1_i1	1177	-177	159	-27.69	186798	22	14866
dre-miR-15b-5p	c135850_g1_i4	1178	-136.97	155	-21.3	2132243	22	3736
dre-miR-17a-2-3p	c139839_g1_i1	1178	-171.41	162	-25.64	2389670	23	10335
dre-miR-16a	c144103_g5_i3	1179	-135.03	164	-22.22	2201880	22	15607
dre-miR-17a-2-3p	c142831_g3_i1	1179	-153.78	159	-27.94	2390693	23	15923
dre-miR-16b	c144103_g5_i3	1180	-133.68	164	-19.72	2232977	22	15607
dre-miR-17a-3p	c142009_g1_i3	1180	-157.41	160	-23.31	2348996	22	11856
dre-miR-22b-5p	c142875_g1_i3	1180	-146.41	162	-22.34	3005949	22	14551
dre-miR-22b-3p	c138966_g2_i3	1180	-160.65	158	-24.09	3046569	22	11737
dre-miR-20a-3p	c133560_g1_i3	1181	-152	152	-22.42	2877848	22	14693
dre-miR-27b-3p	c132034_g1_i2	1181	-161.09	157	-23.76	3509915	22	5975
dre-miR-27e	c142975_g1_i1	1181	-134.88	154	-22.22	3618196	22	11738
dre-miR-15b-5p	c137136_g1_i2	1182	-158.93	156	-25.02	2115452	22	8586
dre-miR-16c-5p	c125038_g1_i1	1182	-134.37	157	-19.93	2253802	22	1926
dre-miR-17a-3p	c140995_g7_i1	1182	-158.62	157	-25.18	2346260	22	7240
dre-miR-20a-3p	c142009_g1_i5	1182	-142.34	163	-23.31	2864049	22	13098
dre-miR-20a-3p	c142009_g1_i7	1182	-142.34	163	-23.31	2881977	22	13089
dre-miR-27d	c132034_g1_i2	1182	-152.06	157	-24.6	3603206	22	5975
dre-miR-222a-5p	c142808_g2_i8	1183	-156.31	154	-24.08	1095021	23	13201
dre-miR-15a-5p	c135971_g1_i1	1183	-146.9	160	-21.5	2063954	22	7339
dre-miR-16c-5p	c115810_g1_i3	1183	-131.99	153	-18.6	2268470	22	9257
dre-miR-199-3p	c138570_g2_i2	1184	-130.85	158	-19.64	558930	22	10732
dre-miR-15b-5p	c130270_g1_i1	1184	-146.02	159	-21.3	2130285	22	4730
dre-miR-17a-2-3p	c142233_g1_i3	1184	-176.57	158	-29.59	2364220	23	12282
dre-miR-22b-5p	c144604_g3_i5	1184	-140.07	159	-19.76	3012344	22	7306
dre-miR-27c-3p	c132034_g1_i1	1184	-147.16	153	-20.75	3545657	21	5919
dre-miR-15b-5p	c144161_g1_i4	1185	-137.35	160	-20.61	2139159	22	14716
dre-miR-24	c107914_g1_i1	1185	-166.78	160	-25.98	3173446	22	8823
dre-miR-17a-2-3p	c141321_g1_i1	1186	-169.77	158	-26.29	2364293	23	16276
dre-miR-221-5p	c142831_g3_i1	1187	-161.68	165	-25.81	1053522	26	15923
dre-miR-9-5p	c139695_g4_i3	1188	-152.94	162	-22.29	1787288	23	4975
dre-miR-10c-5p	c140568_g1_i8	1188	-170.95	157	-24.59	1953879	22	6793
dre-miR-10c-5p	c140568_g1_i4	1188	-170.95	157	-24.59	1957369	22	7005
dre-miR-15a-5p	c130270_g1_i1	1188	-150.65	159	-22.97	2068091	22	4730
dre-miR-17a-2-3p	c136470_g1_i1	1188	-167.52	174	-29.84	2390690	23	12129
dre-miR-15b-5p	c142176_g1_i3	1189	-157.08	158	-25.63	2137869	22	8747
dre-miR-16a	c99099_g1_i2	1189	-132.85	153	-19.77	2177415	22	8423
dre-miR-16a	c99099_g1_i1	1189	-132.85	153	-19.77	2207737	22	8348
dre-miR-214	c135413_g3_i7	1190	-168.76	156	-23.88	911076	21	9104
dre-miR-16a	c140167_g1_i2	1190	-135.77	158	-20.85	2181109	22	13004
dre-miR-16b	c142808_g2_i8	1191	-147.61	154	-22.5	2214513	22	13201
dre-miR-16c-5p	c140167_g1_i2	1191	-143.14	166	-24.51	2243303	22	13004
dre-miR-17a-2-3p	c140734_g1_i5	1191	-176.71	165	-27.81	2371541	23	5730
dre-miR-17a-2-3p	c141957_g1_i6	1192	-178.17	171	-27.24	2380643	23	6453
dre-miR-205-3p	c130759_g1_i1	1193	-147.08	158	-22.76	767402	22	5756
dre-miR-15a-5p	c139145_g3_i2	1193	-132.19	163	-17.87	2053948	22	10090
dre-miR-15a-5p	c139145_g3_i3	1193	-132.19	163	-17.87	2078001	22	11221
dre-miR-16c-5p	c141696_g2_i5	1193	-143.51	157	-21.23	2262136	22	8085
dre-miR-24	c138759_g1_i3	1193	-186.22	160	-28.11	3193863	22	8028
dre-miR-16a	c142878_g2_i1	1194	-126.95	162	-18.95	2200754	22	11272
dre-miR-16b	c142878_g2_i1	1194	-131.7	162	-18.95	2231851	22	11272
dre-miR-24	c134590_g2_i2	1194	-170.63	167	-27.2	3189961	22	14424
dre-miR-16c-5p	c118007_g1_i1	1195	-146.66	160	-25.29	2260354	22	7024
dre-let-7d-5p	c143550_g1_i1	1198	-158.31	166	-23.09	1552398	22	7488
dre-miR-20a-3p	c140734_g1_i2	1198	-172.28	163	-25.07	2873848	22	3816
dre-miR-16b	c118007_g1_i1	1199	-151.27	164	-27.37	2229257	22	7024
dre-miR-24	c139182_g1_i2	1199	-172.44	164	-28.69	3192529	22	6133
dre-miR-27a-3p	c125928_g1_i2	1199	-154.54	159	-23.47	3437611	22	8891
dre-miR-27a-3p	c125928_g1_i1	1199	-154.54	159	-23.47	3444279	22	8877
dre-miR-17a-3p	c142147_g1_i7	1200	-163.57	159	-25.82	2334543	22	18936
dre-miR-20a-3p	c129117_g1_i3	1200	-158	166	-25.86	2868658	22	8307
dre-miR-20a-3p	c129117_g1_i5	1200	-158	166	-25.86	2869427	22	7317
dre-miR-20a-3p	c129117_g1_i1	1200	-158	166	-25.86	2882178	22	7172
dre-miR-22b-5p	c139027_g1_i9	1200	-137.17	164	-18.51	2993198	22	7099
dre-miR-17a-3p	c131915_g2_i2	1202	-160.68	171	-25.59	2338691	22	6068
dre-miR-16c-5p	c144103_g5_i3	1203	-138.61	164	-24.63	2264074	22	15607
dre-miR-27e	c140959_g3_i1	1203	-141.55	160	-21.66	3609647	22	6213
dre-miR-27d	c125928_g1_i2	1205	-151.01	156	-24.31	3593096	22	8891
dre-miR-27d	c125928_g1_i1	1205	-151.01	156	-24.31	3599764	22	8877
dre-miR-27e	c125928_g1_i2	1206	-149.03	156	-22.43	3624193	22	8891
dre-miR-15a-5p	c138377_g2_i3	1207	-146.59	164	-26.54	2054526	22	5773
dre-miR-15a-5p	c138377_g2_i1	1207	-146.59	164	-26.54	2068390	22	5634
dre-miR-214	c128725_g1_i1	1209	-175.23	166	-31.28	903666	21	1943
dre-miR-430c-3p	c144003_g4_i1	1209	-146.57	173	-26.64	1324413	22	15604
dre-miR-19b-5p	c140969_g1_i3	1209	-133.03	165	-18.82	2644378	22	12599
dre-miR-19b-5p	c140969_g1_i1	1209	-133.03	165	-18.82	2662279	22	12425
dre-miR-16c-5p	c122394_g1_i1	1210	-134.47	157	-21.17	2247929	22	4638
dre-miR-16a	c142995_g1_i4	1212	-139.9	168	-24.74	2186347	22	11523
dre-miR-15b-5p	c143674_g1_i2	1213	-144.74	160	-22.36	2141840	22	19154
dre-miR-15a-5p	c135782_g3_i5	1214	-148.66	162	-22.15	2071577	22	4796
dre-miR-15a-5p	c99099_g1_i2	1215	-153.01	166	-22.64	2053027	22	8423
dre-miR-15a-5p	c99099_g1_i1	1215	-153.01	166	-22.64	2083349	22	8348
dre-miR-24	c136506_g1_i1	1216	-226.47	172	-36.52	3184058	22	2232
dre-let-7b	c143550_g1_i1	1217	-164.6	174	-26.28	1459107	22	7488
dre-miR-17a-2-3p	c131915_g2_i2	1217	-168.83	173	-26.99	2369788	23	6068
dre-miR-15a-5p	c141626_g1_i2	1218	-159.67	167	-24.64	2074688	22	13230
dre-miR-15b-5p	c124761_g1_i3	1222	-157.5	166	-23.79	2136420	22	3454
dre-miR-24	c144604_g2_i1	1223	-175.47	160	-26.94	3188533	22	7276
dre-miR-16b	c130465_g1_i7	1224	-142.61	162	-23.12	2217848	22	4635
dre-miR-16b	c130465_g1_i5	1224	-142.61	162	-23.12	2234587	22	4455
dre-miR-15b-5p	c139944_g1_i1	1225	-156.32	162	-24.7	2140332	22	8116
dre-miR-19c-5p	c142264_g1_i1	1225	-153.4	173	-24.75	2729010	22	7215
dre-miR-24	c144604_g2_i5	1229	-170.73	160	-25.87	3191938	22	7267
dre-miR-25-5p	c144187_g1_i5	1235	-223.44	162	-31.23	3212474	23	625
dre-miR-25-5p	c142808_g2_i8	1241	-225.47	164	-32.88	3209617	23	13201
dre-miR-221-5p	c139451_g1_i1	1263	-162.96	170	-26.4	1052342	26	4219
dre-miR-16b	c141321_g1_i1	1273	-148.92	145	-19.67	2208808	22	16276
dre-miR-17a-3p	c142083_g1_i5	1283	-174.14	147	-23.95	2360723	22	4465
dre-miR-15a-5p	c141035_g1_i2	1294	-152.93	149	-21.63	2058714	22	15922
dre-miR-15a-5p	c141035_g1_i3	1294	-152.93	149	-21.63	2063244	22	15931
dre-miR-15a-5p	c141035_g1_i1	1294	-152.93	149	-21.63	2081456	22	16296
dre-miR-20a-3p	c142736_g1_i4	1299	-160.56	152	-21.58	2889539	22	6245
dre-miR-199-5p	c141626_g1_i5	1307	-151.2	153	-21.24	510834	23	11651
dre-miR-22a-5p	c132897_g1_i1	1311	-149.31	158	-21.36	2938057	22	8280
dre-miR-205-3p	c144161_g1_i4	1312	-160.24	154	-23.87	770891	22	14716
dre-miR-22a-5p	c132063_g1_i2	1313	-161.87	155	-23.12	2937326	22	11216
dre-miR-22a-5p	c132063_g1_i1	1313	-161.87	155	-23.12	2946187	22	11228
dre-miR-22b-5p	c133560_g1_i3	1315	-156.72	155	-23.26	3002236	22	14693
dre-miR-22b-5p	c133560_g1_i2	1315	-156.72	155	-23.26	3009090	22	14202
dre-miR-15a-5p	c141321_g1_i1	1316	-156.96	152	-23.74	2053323	22	16276
dre-miR-214	c138355_g2_i1	1317	-177.87	160	-28.31	911411	21	4248
dre-miR-20a-3p	c142831_g3_i1	1317	-166	154	-20.32	2888245	22	15923
dre-miR-18a	c142586_g4_i1	1320	-165.11	162	-21.72	2462576	22	12109
dre-miR-17a-3p	c142009_g1_i5	1321	-178.62	160	-23.31	2335400	22	13098
dre-miR-17a-3p	c144286_g1_i1	1321	-180.72	161	-23.9	2350233	22	3534
dre-miR-17a-3p	c142009_g1_i7	1321	-178.62	160	-23.31	2353328	22	13089
dre-miR-204-3p	c143674_g1_i2	1322	-175.31	155	-24.21	711378	22	19154
dre-miR-15a-5p	c138329_g1_i5	1322	-182.29	153	-22.94	2053201	22	14539
dre-miR-17a-2-3p	c142009_g1_i5	1322	-177.41	158	-22.18	2366497	23	13098
dre-miR-17a-2-3p	c138193_g1_i1	1322	-183.25	155	-29.43	2377571	23	6937
dre-miR-17a-2-3p	c142009_g1_i3	1322	-177.41	158	-22.18	2380093	23	11856
dre-miR-17a-2-3p	c142009_g1_i7	1322	-177.41	158	-22.18	2384425	23	13089
dre-miR-15b-5p	c135850_g1_i5	1324	-151.92	155	-21.3	2132475	22	3922
dre-miR-214	c140892_g1_i2	1325	-184.77	160	-25.13	932684	21	11160
dre-miR-17a-2-3p	c144286_g1_i1	1326	-182.79	161	-23.46	2381330	23	3534
dre-miR-15a-5p	c144161_g1_i4	1329	-162.04	154	-22.17	2076965	22	14716
dre-miR-22a-5p	c133774_g1_i3	1330	-169.84	156	-25.16	2923485	22	9611
dre-miR-22a-3p	c138329_g1_i5	1330	-173.65	156	-23.43	2955014	22	14539
dre-miR-16a	c142831_g3_i1	1331	-162.6	159	-20.43	2204111	22	15923
dre-miR-16b	c142831_g3_i1	1331	-160.03	159	-19.07	2235208	22	15923
dre-miR-15a-5p	c137481_g4_i4	1332	-183.51	163	-23.97	2076050	22	5621
dre-miR-15b-5p	c137481_g4_i4	1332	-177.11	155	-22.22	2138244	22	5621
dre-miR-20a-3p	c142586_g3_i10	1332	-180.88	160	-26.42	2865450	22	11052
dre-miR-15b-5p	c141777_g1_i11	1333	-164.35	161	-22.92	2122115	22	10567
dre-miR-17a-2-3p	c141457_g1_i2	1334	-196.98	163	-27.65	2378391	23	12341
dre-miR-17a-2-3p	c141457_g1_i5	1334	-196.98	163	-27.65	2381684	23	12386
dre-miR-20a-3p	c142875_g1_i3	1334	-171.74	166	-25.63	2881561	22	14551
dre-miR-16c-5p	c142808_g2_i8	1335	-163.84	159	-24.7	2245610	22	13201
dre-miR-25-5p	c139118_g1_i2	1335	-219.93	164	-33.88	3231482	23	4970
dre-miR-222a-5p	c137136_g1_i2	1336	-179.26	164	-25.82	1089251	23	8586
dre-miR-222a-5p	c137136_g1_i3	1336	-179.26	164	-25.82	1108061	23	8841
dre-miR-222a-5p	c137136_g1_i1	1336	-179.26	164	-25.82	1113557	23	8815
dre-miR-222a-5p	c137136_g1_i5	1336	-179.26	164	-25.82	1114339	23	8628
dre-miR-27c-3p	c132034_g1_i2	1336	-167.86	153	-20.75	3572109	21	5975
dre-miR-15a-5p	c142586_g3_i10	1338	-165.55	158	-20.88	2056928	22	11052
dre-miR-22a-3p	c141321_g1_i1	1339	-167.19	158	-26.79	2955136	22	16276
dre-miR-10c-5p	c140568_g1_i3	1341	-190.96	157	-24.59	1949134	22	6847
dre-miR-17a-3p	c142586_g3_i10	1343	-191.3	158	-24.02	2336801	22	11052
dre-miR-20a-3p	c140734_g1_i5	1343	-191.61	163	-25.07	2869093	22	5730
dre-miR-15a-5p	c137481_g4_i1	1344	-187.48	163	-23.97	2070461	22	5643
dre-miR-20a-3p	c141321_g1_i1	1344	-172.74	164	-24.29	2861845	22	16276
dre-miR-15a-5p	c138260_g3_i6	1345	-160.46	160	-23.61	2059285	22	10308
dre-miR-15a-5p	c138260_g3_i7	1345	-160.46	160	-23.61	2081689	22	10216
dre-let-7i	c143550_g1_i1	1346	-177.54	180	-26.88	1738980	22	7488
dre-miR-17a-2-3p	c142147_g1_i7	1347	-179.93	162	-26.34	2365640	23	18936
dre-miR-15a-5p	c142878_g2_i4	1348	-166.02	159	-21.75	2072962	22	10328
dre-miR-15a-5p	c142878_g2_i1	1348	-166.02	159	-21.75	2076366	22	11272
dre-miR-16c-5p	c142995_g1_i3	1348	-147.32	168	-18.68	2260524	22	10626
dre-miR-22b-5p	c144604_g3_i4	1348	-160.51	162	-19.76	2994750	22	7294
dre-miR-22b-5p	c142919_g1_i4	1348	-165.21	171	-23.74	3006692	22	7960
dre-miR-22b-5p	c144604_g3_i1	1348	-160.51	162	-19.76	3015700	22	7315
dre-miR-24	c141321_g1_i1	1350	-190.29	169	-29.69	3172815	22	16276
dre-miR-15b-5p	c137481_g4_i1	1352	-180.91	157	-22.21	2132655	22	5643
dre-miR-22b-3p	c138329_g1_i5	1353	-188.24	164	-29.96	3017208	22	14539
dre-miR-210-5p	c140955_g1_i8	1357	-192.33	162	-26.97	796057	22	14824
dre-miR-16b	c122394_g1_i1	1357	-152.24	157	-21.32	2216832	22	4638
dre-miR-24	c143674_g1_i4	1357	-200.39	166	-27.72	3181844	22	10637
dre-miR-24	c143674_g1_i7	1357	-200.39	166	-27.72	3193024	22	10610
dre-miR-15b-5p	c142878_g2_i4	1359	-180.51	160	-25.71	2135156	22	10328
dre-miR-15b-5p	c142878_g2_i1	1359	-180.51	160	-25.71	2138560	22	11272
dre-miR-22b-3p	c141321_g1_i1	1364	-168.18	163	-27.8	3017330	22	16276
dre-miR-22b-5p	c141606_g1_i5	1366	-146.33	160	-19.7	2990750	22	4288
dre-miR-22b-5p	c141606_g1_i4	1366	-146.33	160	-19.7	3015152	22	5587
dre-miR-25-5p	c134972_g2_i1	1368	-225.45	164	-31.07	3218490	23	5274
dre-miR-25-5p	c134972_g2_i2	1368	-225.45	164	-31.07	3222127	23	5212
dre-miR-9-5p	c100864_g1_i2	1388	-150.82	167	-20.15	1801549	23	4773
dre-miR-19b-5p	c142264_g1_i1	1405	-157.56	174	-21.63	2666816	22	7215
dre-miR-25-5p	c140123_g1_i2	1421	-253.71	168	-33.43	3232791	23	4513
dre-miR-214	c131995_g1_i1	1428	-183.64	149	-22.04	902366	21	12919
dre-miR-199-5p	c121917_g1_i1	1436	-199.46	151	-28.86	497768	23	14866
dre-miR-20a-3p	c142736_g1_i1	1445	-181.95	152	-21.58	2869113	22	6125
dre-miR-27e	c142009_g1_i5	1455	-180.97	158	-21.69	3610377	22	13098
dre-miR-27e	c142009_g1_i3	1455	-180.97	158	-21.69	3623973	22	11856
dre-miR-27b-3p	c142009_g1_i5	1457	-187.61	159	-26.62	3485989	22	13098
dre-miR-27b-3p	c142009_g1_i3	1457	-187.61	159	-26.62	3499585	22	11856
dre-miR-27b-3p	c142009_g1_i7	1457	-187.61	159	-26.62	3503917	22	13089
dre-miR-214	c142995_g1_i4	1458	-213.23	161	-26.71	911370	21	11523
dre-miR-214	c142995_g1_i3	1458	-213.23	161	-26.71	923353	21	10626
dre-miR-15a-5p	c132598_g1_i1	1459	-169.11	159	-22.35	2082824	22	5656
dre-miR-16c-5p	c138759_g1_i3	1459	-171.9	151	-20.79	2260953	22	8028
dre-miR-22a-5p	c138549_g1_i4	1459	-179.39	156	-21.59	2926913	22	10808
dre-miR-15a-5p	c138346_g1_i10	1461	-175.14	153	-21.26	2060996	22	7963
dre-miR-15a-5p	c138346_g1_i8	1461	-175.14	153	-21.26	2071142	22	8170
dre-miR-15a-5p	c138346_g1_i2	1461	-175.14	153	-21.26	2075058	22	7948
dre-miR-27d	c142009_g1_i5	1462	-189.38	160	-23.93	3579280	22	13098
dre-miR-27d	c142009_g1_i3	1462	-189.38	160	-23.93	3592876	22	11856
dre-miR-27d	c142009_g1_i7	1462	-189.38	160	-23.93	3597208	22	13089
dre-miR-22b-5p	c141254_g1_i1	1464	-173.24	158	-21.61	2986897	22	10075
dre-miR-214	c142219_g2_i3	1465	-192.08	160	-25.44	927747	21	9097
dre-miR-16a	c142861_g1_i4	1467	-161.36	153	-18.6	2188828	22	15464
dre-miR-16a	c142861_g1_i2	1467	-161.36	153	-18.6	2205834	22	15416
dre-miR-17a-3p	c141321_g1_i1	1472	-211.77	159	-26.7	2333196	22	16276
dre-miR-17a-3p	c121120_g1_i4	1472	-199.04	161	-30.16	2336181	22	5892
dre-miR-19d-5p	c141035_g1_i2	1475	-237.12	157	-27.02	2773945	24	15922
dre-miR-19d-5p	c141035_g1_i3	1475	-237.12	157	-27.02	2778475	24	15931
dre-miR-19d-5p	c141035_g1_i1	1475	-237.12	157	-27.02	2796687	24	16296
dre-miR-16b	c142861_g1_i4	1481	-169.69	155	-21.26	2219925	22	15464
dre-miR-16b	c142861_g1_i2	1481	-169.69	155	-21.26	2236931	22	15416
dre-miR-15b-5p	c142831_g3_i1	1483	-187.78	155	-26.26	2141917	22	15923
dre-miR-25-5p	c143266_g1_i6	1483	-256.24	159	-32.11	3220566	23	11489
dre-miR-205-5p	c139264_g1_i1	1485	-208.36	159	-29.03	742046	22	14411
dre-miR-16c-5p	c131995_g1_i1	1485	-170.35	165	-20.9	2239537	22	12919
dre-miR-15a-5p	c135971_g1_i4	1487	-184.71	160	-21.5	2074046	22	5855
dre-miR-27b-3p	c125928_g1_i2	1487	-187.76	157	-23.93	3499805	22	8891
dre-miR-27b-3p	c125928_g1_i1	1487	-187.76	157	-23.93	3506473	22	8877
dre-miR-16a	c138260_g3_i6	1488	-170.98	163	-20.97	2183673	22	10308
dre-miR-16a	c138260_g3_i7	1488	-170.98	163	-20.97	2206077	22	10216
dre-miR-16b	c138260_g3_i6	1488	-179.19	163	-24.17	2214770	22	10308
dre-miR-16b	c138260_g3_i7	1488	-179.19	163	-24.17	2237174	22	10216
dre-miR-20a-3p	c143992_g1_i3	1489	-199.41	160	-28.93	2867064	22	16666
dre-miR-16c-5p	c142861_g1_i4	1490	-176.93	157	-21.38	2251022	22	15464
dre-miR-16c-5p	c142861_g1_i2	1490	-176.93	157	-21.38	2268028	22	15416
dre-miR-15b-5p	c138260_g3_i6	1491	-185.87	159	-21.98	2121479	22	10308
dre-miR-15b-5p	c138260_g3_i7	1491	-185.87	159	-21.98	2143883	22	10216
dre-miR-16b	c131995_g1_i1	1496	-180.46	165	-20.9	2208440	22	12919
dre-miR-16a	c122394_g1_i1	1497	-163.83	157	-18.58	2185735	22	4638
dre-miR-16c-5p	c142995_g1_i4	1499	-170.67	168	-23.35	2248541	22	11523
dre-miR-15b-5p	c130465_g1_i7	1500	-168.06	167	-20.61	2124557	22	4635
dre-miR-15b-5p	c130465_g1_i5	1500	-168.06	167	-20.61	2141296	22	4455
dre-miR-15a-5p	c143674_g1_i2	1502	-179.33	168	-23.27	2079646	22	19154
dre-miR-15a-5p	c118007_g1_i1	1503	-185.03	167	-23.7	2073772	22	7024
dre-miR-15a-5p	c122394_g1_i1	1513	-178.43	163	-24.28	2061347	22	4638
dre-miR-16a	c130465_g1_i7	1519	-170.4	162	-23.73	2186751	22	4635
dre-miR-16a	c130465_g1_i5	1519	-170.4	162	-23.73	2203490	22	4455
dre-miR-15a-5p	c142831_g3_i1	1520	-205.91	168	-25.33	2079723	22	15923
dre-miR-16c-5p	c141321_g1_i1	1563	-174.98	146	-19.67	2239905	22	16276
dre-miR-205-3p	c117161_g1_i1	1591	-193.89	162	-23.72	770187	22	11620
dre-miR-34a	c142831_g3_i1	1592	-238.82	152	-26.05	213903	22	15923
dre-miR-27a-3p	c142009_g1_i5	1596	-212.64	163	-23.69	3423795	22	13098
dre-miR-27a-3p	c142009_g1_i3	1596	-212.64	163	-23.69	3437391	22	11856
dre-miR-27a-3p	c142009_g1_i7	1596	-212.64	163	-23.69	3441723	22	13089
dre-miR-15a-5p	c141413_g1_i3	1602	-189.16	157	-20.45	2061185	22	7361
dre-miR-16a	c138759_g1_i3	1608	-184.22	151	-22.53	2198759	22	8028
dre-miR-214	c143611_g1_i1	1615	-206.98	159	-27.03	915916	21	13732
dre-miR-16b	c138759_g1_i3	1617	-193.05	151	-20.79	2229856	22	8028
dre-miR-199-5p	c142631_g1_i1	1619	-215.46	152	-27.68	523908	23	11453
dre-miR-16c-5p	c142515_g1_i2	1621	-172.05	159	-18.75	2263953	22	14310
dre-miR-25-5p	c142586_g3_i10	1624	-314.82	157	-37.06	3207517	23	11052
dre-miR-15a-5p	c142861_g1_i4	1634	-190.59	155	-21.31	2064440	22	15464
dre-miR-15a-5p	c142861_g1_i2	1634	-190.59	155	-21.31	2081446	22	15416
dre-miR-15b-5p	c141413_g1_i3	1636	-194.75	157	-20.83	2123379	22	7361
dre-miR-214	c142088_g1_i2	1644	-232.49	172	-31.89	911489	21	9730
dre-miR-15b-5p	c99099_g1_i2	1645	-199.11	162	-22.76	2115221	22	8423
dre-miR-15b-5p	c99099_g1_i1	1645	-199.11	162	-22.76	2145543	22	8348
dre-miR-214	c143674_g1_i2	1647	-232.61	162	-25.23	929057	21	19154
dre-miR-17a-2-3p	c142586_g3_i10	1647	-238.92	163	-26.42	2367898	23	11052
dre-miR-15b-5p	c141035_g1_i2	1656	-192.72	161	-24.81	2120908	22	15922
dre-miR-15b-5p	c141035_g1_i3	1656	-192.72	161	-24.81	2125438	22	15931
dre-miR-15b-5p	c141035_g1_i1	1656	-192.72	161	-24.81	2143650	22	16296
dre-miR-15a-5p	c142995_g1_i3	1678	-198.98	161	-22.93	2073942	22	10626
dre-miR-9-5p	c138470_g2_i2	1684	-190.7	169	-20.77	1795619	23	9857
dre-miR-214	c118007_g1_i1	1724	-235.3	152	-24.41	923183	21	7024
dre-miR-17a-2-3p	c143992_g1_i3	1737	-236.06	152	-26.89	2369512	23	16666
dre-miR-17a-3p	c143992_g1_i3	1744	-234.23	152	-24.93	2338415	22	16666
dre-miR-17a-3p	c143992_g1_i10	1747	-240.63	152	-24.93	2343768	22	17180
dre-miR-15b-5p	c141321_g1_i1	1759	-211.95	156	-24.28	2115517	22	16276
dre-miR-17a-2-3p	c121120_g1_i4	1762	-252.22	161	-28.04	2367278	23	5892
dre-miR-15b-5p	c141413_g1_i1	1773	-214.01	157	-20.83	2143898	22	6575
dre-miR-222a-5p	c142147_g1_i7	1781	-241.11	165	-24.9	1090663	23	18936
dre-miR-15a-5p	c138759_g1_i3	1781	-213.33	160	-21.9	2074371	22	8028
dre-miR-204-5p	c140568_g1_i3	1783	-246.25	161	-27.38	674157	22	6847
dre-miR-204-5p	c140568_g1_i8	1783	-246.25	161	-27.38	678902	22	6793
dre-miR-204-5p	c140568_g1_i4	1783	-246.25	161	-27.38	682392	22	7005
dre-miR-16a	c131995_g1_i1	1800	-209.62	165	-21.4	2177343	22	12919
dre-miR-214	c138329_g1_i5	1801	-230.76	165	-26.64	902612	21	14539
dre-miR-15b-5p	c142995_g1_i3	1812	-215.96	167	-23.35	2136136	22	10626
dre-miR-9-5p	c138470_g2_i4	1826	-208.41	169	-20.77	1785563	23	10391
dre-miR-9-5p	c138470_g2_i1	1826	-208.41	169	-20.77	1802234	23	10732
dre-miR-15a-5p	c142995_g1_i4	1828	-222.1	161	-23.12	2061959	22	11523
dre-miR-15a-5p	c130465_g1_i5	1832	-219.77	167	-24.6	2079102	22	4455
dre-miR-15a-5p	c141413_g1_i1	1893	-225.24	157	-20.45	2081704	22	6575
dre-miR-214	c137481_g4_i5	1903	-236.07	155	-23.87	919094	21	5657
dre-miR-214	c137481_g4_i7	1903	-236.07	155	-23.87	932304	21	5449
dre-miR-15b-5p	c142995_g1_i4	1971	-239.9	167	-23.94	2124153	22	11523
dre-miR-15a-5p	c130465_g1_i7	1980	-234.32	167	-24.6	2062363	22	4635
dre-miR-15b-5p	c122394_g1_i1	1999	-228.42	163	-23.43	2123541	22	4638
dre-miR-17a-2-3p	c143992_g1_i10	2020	-282.24	152	-26.89	2374865	23	17180
dre-miR-16c-5p	c141413_g1_i1	2046	-243.64	159	-22.53	2268286	22	6575
dre-miR-214	c141035_g1_i2	2049	-276.96	157	-26.47	908125	21	15922
dre-miR-214	c141035_g1_i3	2049	-276.96	157	-26.47	912655	21	15931
dre-miR-214	c141035_g1_i1	2049	-276.96	157	-26.47	930867	21	16296
dre-miR-16a	c141413_g1_i1	2050	-241.7	155	-20.53	2206092	22	6575
dre-miR-16a	c141413_g1_i3	2065	-238.81	159	-20.53	2185573	22	7361
dre-miR-15b-5p	c138759_g1_i3	2068	-245.76	160	-21.47	2136565	22	8028
dre-miR-16c-5p	c141413_g1_i3	2069	-244.68	159	-22.53	2247767	22	7361
dre-miR-15b-5p	c131995_g1_i1	2106	-242.68	167	-24.03	2115149	22	12919
dre-miR-16b	c141413_g1_i1	2190	-259.79	155	-22.53	2237189	22	6575
dre-miR-16b	c141413_g1_i3	2205	-258.16	159	-22.53	2216670	22	7361
dre-miR-214	c137481_g4_i6	2218	-283.8	156	-26.33	908095	21	4527
dre-miR-24	c143674_g1_i2	2228	-326.44	166	-27.72	3199138	22	19154
dre-miR-214	c137481_g4_i1	2419	-332.79	160	-25.91	919872	21	5643
dre-miR-214	c138759_g1_i3	2515	-342.21	161	-26.92	923782	21	8028
dre-miR-15a-5p	c131995_g1_i1	2558	-324.75	160	-30.94	2052955	22	12919
dre-miR-214	c137481_g4_i4	2830	-372.44	155	-23.87	925461	21	5621
dre-miR-16b	c142088_g1_i2	3139	-378.46	162	-23.87	2217563	22	9730
dre-miR-16a	c142088_g1_i2	3275	-381.18	162	-22.83	2186466	22	9730
dre-miR-16c-5p	c142088_g1_i2	3717	-431.94	162	-23.03	2248660	22	9730
dre-miR-15b-5p	c142088_g1_i2	3801	-427.21	171	-26.1	2124272	22	9730
dre-miR-15a-5p	c142088_g1_i2	4523	-545.52	167	-25.79	2062078	22	9730
dre-miR-92b-5p	c142125_g3_i1	1004	-162.8	147	-27.22	4058026	24	5127
dre-miR-457b-5p	c144161_g1_i4	1004	-111.59	147	-20.61	8171977	22	14716
dre-miR-107a-5p	c139839_g1_i1	1005	-123.92	148	-19.87	4442072	23	10335
dre-miR-138-5p	c121917_g1_i1	1005	-145.58	152	-26.57	5566579	22	14866
dre-miR-193a-5p	c137601_g1_i1	1006	-157.81	150	-27.04	6559963	22	5966
dre-miR-138-5p	c143365_g2_i1	1008	-128.45	158	-24.81	5578924	22	8171
dre-miR-457a	c242840_g1_i1	1008	-115.33	150	-18.35	8141550	22	690
dre-miR-92b-5p	c132725_g2_i3	1009	-172.58	149	-28.28	4052667	24	2217
dre-miR-103	c127691_g1_i4	1009	-133.32	148	-22.19	4398968	23	6931
dre-miR-103	c127691_g1_i1	1009	-133.32	148	-22.19	4409165	23	7018
dre-miR-92b-5p	c134843_g1_i1	1010	-148.2	153	-26.84	4067830	24	10006
dre-miR-138-5p	c139963_g9_i2	1010	-137.71	158	-25.22	5582623	22	6040
dre-miR-107a-3p	c109375_g1_i2	1011	-127.21	152	-20.97	4458039	23	6834
dre-miR-130c-5p	c135608_g1_i1	1011	-127.9	150	-24.66	5150848	22	8447
dre-miR-138-5p	c133430_g2_i1	1011	-129.2	151	-22.11	5583015	22	2905
dre-miR-184	c133834_g1_i1	1011	-151.76	149	-25.33	6446540	22	9066
dre-miR-92b-5p	c129819_g1_i2	1012	-157.07	154	-27.17	4072839	24	9746
dre-miR-107a-5p	c141767_g1_i2	1013	-118.98	154	-22.36	4440440	23	5002
dre-miR-122	c133547_g3_i2	1013	-126.68	159	-21.77	4481165	22	8226
dre-miR-128-3p	c142975_g1_i1	1013	-130.51	156	-22.15	4955367	22	11738
dre-miR-133c-3p	c141615_g3_i2	1013	-136.95	152	-24.46	5469398	22	6386
dre-miR-138-5p	c126164_g1_i1	1013	-144.83	149	-23.47	5589265	22	7901
dre-miR-145-5p	c142875_g1_i2	1013	-143.23	149	-23.7	5952035	22	11568
dre-miR-145-5p	c142875_g1_i3	1013	-143.23	149	-23.7	5960164	22	14551
dre-miR-133a-3p	c41601_g1_i1	1014	-142.99	151	-26.32	5287240	22	2863
dre-miR-133b-3p	c41601_g1_i1	1014	-142.99	151	-26.32	5380531	22	2863
dre-miR-133c-3p	c105570_g1_i1	1014	-144.88	155	-23.56	5451339	22	3942
dre-miR-138-5p	c140759_g1_i2	1014	-136.16	152	-23.88	5590737	22	10438
dre-miR-153b-5p	c129117_g1_i3	1014	-120.12	155	-19.22	6164940	22	8307
dre-miR-457b-5p	c140855_g2_i16	1014	-127.02	156	-22.53	8158784	22	10189
dre-miR-129-5p	c140468_g1_i2	1015	-129.97	154	-23.21	4984885	22	5914
dre-miR-92b-5p	c141626_g1_i5	1016	-157.07	153	-26.39	4055892	24	11651
dre-miR-92b-5p	c141626_g1_i2	1016	-157.07	153	-26.39	4064896	24	13230
dre-miR-125b-2-3p	c141978_g1_i2	1016	-179.86	150	-33.77	4742491	21	6077
dre-miR-128-3p	c140955_g1_i8	1016	-138.2	160	-23.69	4963055	22	14824
dre-miR-138-5p	c144103_g5_i2	1016	-135.16	153	-25.79	5568952	22	8884
dre-miR-193a-5p	c142971_g3_i5	1016	-150.72	150	-23.87	6531292	22	15175
dre-miR-193a-5p	c142971_g3_i6	1016	-150.72	150	-23.87	6543764	22	15274
dre-miR-193a-5p	c142971_g3_i4	1016	-150.72	150	-23.87	6556752	22	15322
dre-miR-363-5p	c140486_g1_i3	1016	-134.19	152	-22.04	7519358	23	4054
dre-miR-138-5p	c141666_g1_i5	1017	-137.85	155	-21.82	5579124	22	5609
dre-miR-138-5p	c141666_g1_i3	1017	-137.85	155	-21.82	5587729	22	5690
dre-miR-153a-5p	c140044_g3_i3	1017	-124.98	149	-23.17	6220151	23	13083
dre-miR-153a-5p	c140044_g3_i8	1017	-124.98	149	-23.17	6220206	23	12294
dre-miR-153a-5p	c140044_g3_i10	1017	-124.98	149	-23.17	6245902	23	12533
dre-miR-92b-5p	c139201_g1_i2	1018	-168.33	157	-30.2	4047223	24	10577
dre-miR-92b-5p	c139201_g1_i4	1018	-168.33	157	-30.2	4060284	24	10859
dre-miR-107a-5p	c121841_g1_i1	1018	-128.89	151	-24.28	4429583	23	5116
dre-miR-103	c143992_g1_i3	1019	-139.57	152	-25.35	4390817	23	16666
dre-miR-107a-3p	c143992_g1_i3	1019	-137.98	152	-25.08	4453011	23	16666
dre-miR-133a-3p	c137481_g5_i3	1019	-148.84	154	-26.87	5316621	22	5688
dre-miR-138-5p	c142586_g4_i1	1019	-136.94	155	-23.08	5572276	22	12109
dre-miR-30a-3p	c137197_g1_i1	1020	-128.68	153	-22.38	3732991	22	14775
dre-miR-30e-3p	c131225_g1_i3	1020	-128.64	154	-24.92	3926502	22	6681
dre-miR-30e-3p	c131225_g1_i2	1020	-128.64	154	-24.92	3933661	22	7768
dre-miR-30e-3p	c131225_g1_i1	1020	-128.64	154	-24.92	3940374	22	6558
dre-miR-92b-5p	c143919_g1_i1	1021	-162.01	150	-25.73	4064953	24	4469
dre-miR-133c-3p	c41601_g1_i1	1021	-132.4	151	-23.34	5442725	22	2863
dre-miR-129-5p	c138818_g2_i1	1022	-131.27	155	-26.1	4977148	22	5718
dre-miR-129-5p	c133328_g1_i1	1023	-137.72	154	-23.88	4977342	22	4829
dre-miR-138-5p	c136401_g1_i1	1023	-139.85	171	-23.05	5580955	22	5977
dre-miR-138-5p	c136401_g1_i2	1023	-139.85	171	-23.05	5595096	22	6125
dre-miR-107a-5p	c128755_g1_i1	1024	-130.38	161	-22.52	4429547	23	6538
dre-miR-133a-3p	c105570_g1_i1	1024	-146.84	155	-26.29	5295854	22	3942
dre-miR-133b-3p	c105570_g1_i1	1024	-146.84	155	-26.29	5389145	22	3942
dre-miR-363-5p	c142378_g1_i3	1024	-138.98	150	-25.48	7510287	23	14655
dre-miR-363-5p	c142378_g1_i8	1024	-138.98	150	-25.48	7515835	23	14547
dre-miR-92a-5p	c130842_g2_i5	1025	-146.07	164	-25.31	3971583	23	8994
dre-miR-107a-5p	c136599_g3_i6	1025	-121.69	154	-19.87	4422368	23	5286
dre-miR-143	c142219_g2_i3	1025	-128.88	159	-21.51	5872170	21	9097
dre-miR-92a-2-5p	c126105_g1_i3	1026	-139.19	164	-24.91	4021085	23	4568
dre-miR-92a-2-5p	c126105_g1_i2	1026	-139.19	164	-24.91	4034748	23	4553
dre-miR-92b-5p	c109875_g1_i1	1026	-165.76	155	-32.26	4068517	24	4870
dre-miR-125c-5p	c138907_g1_i4	1026	-158.14	155	-27.17	4800880	22	12870
dre-miR-125c-5p	c138907_g1_i3	1026	-158.14	155	-27.17	4811478	22	12903
dre-miR-125c-5p	c138907_g1_i1	1026	-158.14	155	-27.17	4815026	22	12957
dre-miR-216b	c142378_g1_i3	1026	-122	153	-20.56	7199317	22	14655
dre-miR-30e-3p	c143992_g1_i10	1027	-127.36	156	-22.49	3929715	22	17180
dre-miR-92a-2-5p	c143992_g1_i10	1027	-148.39	154	-26.72	4023006	23	17180
dre-miR-107a-5p	c128418_g1_i1	1027	-127.47	155	-22.33	4432800	23	7147
dre-miR-338	c117161_g1_i1	1027	-116.42	155	-20.81	7487139	22	11620
dre-miR-456	c143674_g1_i4	1027	-140.52	162	-28.21	8095170	22	10637
dre-miR-456	c141987_g8_i8	1027	-124.34	155	-21.16	8096159	22	5905
dre-miR-456	c143674_g1_i7	1027	-140.52	162	-28.21	8106350	22	10610
dre-miR-124-6-5p	c143992_g1_i10	1028	-144.84	156	-25.45	4613849	22	17180
dre-miR-92b-5p	c128747_g1_i3	1029	-158.71	165	-27.73	4046584	24	4578
dre-miR-92b-5p	c128747_g1_i2	1029	-158.71	165	-27.73	4054104	24	5490
dre-miR-92b-5p	c128747_g1_i5	1029	-158.71	165	-27.73	4058297	24	4746
dre-miR-92b-5p	c128747_g1_i1	1029	-158.71	165	-27.73	4061087	24	5745
dre-miR-103	c141035_g1_i2	1029	-123.96	156	-21.62	4390989	23	15922
dre-miR-103	c141035_g1_i3	1029	-123.96	156	-21.62	4395519	23	15931
dre-miR-103	c141035_g1_i1	1029	-123.96	156	-21.62	4413731	23	16296
dre-miR-107a-3p	c141035_g1_i2	1029	-130.7	156	-23.49	4453183	23	15922
dre-miR-107a-3p	c141035_g1_i3	1029	-130.7	156	-23.49	4457713	23	15931
dre-miR-107a-3p	c141035_g1_i1	1029	-130.7	156	-23.49	4475925	23	16296
dre-miR-124-4-5p	c133933_g2_i2	1029	-115.03	150	-20.91	4578829	22	6151
dre-miR-153a-5p	c142147_g1_i7	1029	-118.81	158	-18.93	6221668	23	18936
dre-miR-456	c140469_g12_i2	1029	-144.72	156	-24.55	8094137	22	4409
dre-miR-138-5p	c137544_g1_i2	1030	-142.85	156	-25.95	5578867	22	4282
dre-miR-103	c133740_g1_i1	1031	-135.32	157	-23.95	4400716	23	7853
dre-miR-153a-5p	c135885_g4_i6	1031	-118.06	155	-20.37	6233679	23	9921
dre-miR-457b-5p	c135850_g1_i4	1031	-124.47	154	-22.15	8165061	22	3736
dre-miR-138-5p	c142875_g1_i3	1032	-142.37	165	-25.39	5587000	22	14551
dre-miR-148	c132253_g1_i2	1032	-110.98	151	-17.98	6065157	22	7307
dre-miR-148	c132253_g1_i3	1032	-110.98	151	-17.98	6077558	22	6815
dre-miR-153b-5p	c143138_g1_i4	1032	-123.21	164	-21.33	6167297	22	3608
dre-miR-153a-5p	c138876_g1_i7	1032	-122	160	-19.82	6220619	23	6027
dre-miR-153a-5p	c138876_g1_i3	1032	-122	160	-19.82	6224835	23	6092
dre-miR-363-5p	c144182_g2_i5	1032	-151.66	157	-27.74	7497988	23	8977
dre-miR-363-5p	c144182_g2_i2	1032	-151.66	157	-27.74	7510330	23	10675
dre-miR-363-5p	c144182_g2_i3	1032	-151.66	157	-27.74	7512141	23	11038
dre-miR-457b-5p	c115810_g1_i3	1032	-120.35	157	-19.7	8176900	22	9257
dre-miR-103	c48353_g1_i1	1033	-121.22	157	-22.55	4400482	23	2727
dre-miR-103	c137047_g3_i4	1033	-128.93	156	-26.21	4402445	23	7564
dre-miR-107a-3p	c48353_g1_i1	1033	-120.89	157	-20.44	4462676	23	2727
dre-miR-204-2-3p	c142861_g1_i4	1033	-150.52	158	-24.45	7102154	21	15464
dre-miR-204-2-3p	c142861_g1_i2	1033	-150.52	158	-24.45	7119160	21	15416
dre-miR-218a	c140044_g3_i16	1033	-122.02	160	-20.74	7232905	22	13669
dre-miR-338	c127691_g1_i4	1033	-127.37	155	-22.92	7477571	22	6931
dre-miR-338	c127691_g1_i1	1033	-127.37	155	-22.92	7487768	22	7018
dre-miR-457a	c133774_g1_i3	1033	-114.14	156	-19.51	8116684	22	9611
dre-miR-363-5p	c140969_g1_i3	1034	-132.56	155	-21.93	7495510	23	12599
dre-miR-363-5p	c140969_g1_i1	1034	-132.56	155	-21.93	7513411	23	12425
dre-miR-107a-5p	c130048_g1_i1	1035	-119.46	161	-24.79	4419893	23	2724
dre-miR-124-4-5p	c143611_g1_i1	1035	-127.73	156	-21.85	4585362	22	13732
dre-miR-145-5p	c139695_g4_i5	1035	-132.1	163	-20.27	5944623	22	4721
dre-miR-456	c143992_g1_i10	1035	-149.08	154	-25.22	8096713	22	17180
dre-miR-457b-5p	c142878_g2_i1	1035	-111.42	159	-18.43	8171378	22	11272
dre-miR-92a-5p	c131412_g1_i2	1036	-139.72	161	-25.55	3955105	23	5806
dre-miR-107a-5p	c131225_g1_i1	1036	-122.3	157	-25.15	4437926	23	6558
dre-miR-107a-5p	c142378_g1_i3	1037	-137.7	153	-26.57	4431684	23	14655
dre-miR-107a-5p	c142378_g1_i8	1037	-137.7	153	-26.57	4437232	23	14547
dre-miR-133a-3p	c121917_g1_i1	1037	-157.32	156	-26.78	5286706	22	14866
dre-miR-133b-3p	c121917_g1_i1	1037	-152.12	156	-26.88	5379997	22	14866
dre-miR-138-5p	c97918_g1_i1	1037	-135.81	156	-22.56	5573709	22	3945
dre-miR-138-5p	c97918_g1_i2	1037	-135.81	156	-22.56	5596220	22	4004
dre-miR-457a	c142878_g2_i4	1037	-124.93	157	-21.83	8136877	22	10328
dre-miR-457a	c137481_g4_i4	1037	-122.65	156	-20.14	8139965	22	5621
dre-miR-138-5p	c107914_g1_i1	1038	-141.43	152	-26.09	5567915	22	8823
dre-miR-181c-5p	c110040_g1_i1	1038	-134.03	162	-21.71	6395279	22	6020
dre-miR-138-5p	c137195_g1_i3	1039	-136.07	158	-21.9	5572958	22	4379
dre-miR-140-3p	c144103_g5_i3	1039	-141.44	158	-22.36	5684744	23	15607
dre-miR-457b-5p	c99099_g1_i2	1039	-110.49	155	-18.68	8148039	22	8423
dre-miR-457b-5p	c99099_g1_i1	1039	-110.49	155	-18.68	8178361	22	8348
dre-miR-128-5p	c125800_g1_i2	1040	-208.5	156	-40.6	4931625	23	2849
dre-miR-153c-5p	c137630_g1_i7	1040	-118.11	164	-20.82	6281999	22	4719
dre-miR-153c-5p	c137630_g1_i5	1040	-118.11	164	-20.82	6302438	22	4619
dre-miR-457a	c115810_g1_i3	1040	-114.46	157	-19.62	8145803	22	9257
dre-miR-27e	c132034_g1_i2	1041	-139.48	162	-26.14	3634303	22	5975
dre-miR-30a-3p	c142147_g1_i7	1041	-136.16	159	-24.17	3733908	22	18936
dre-miR-92b-5p	c134899_g2_i1	1041	-152.84	154	-27.19	4048192	24	8392
dre-miR-92b-5p	c134899_g2_i2	1041	-152.84	154	-27.19	4060059	24	8129
dre-miR-107a-5p	c138377_g1_i4	1041	-132.95	162	-24.33	4435859	23	5782
dre-miR-125b-5p	c138907_g1_i4	1041	-168.48	162	-28.48	4676492	22	12870
dre-miR-125b-5p	c138907_g1_i3	1041	-168.48	162	-28.48	4687090	22	12903
dre-miR-125b-5p	c138907_g1_i1	1041	-168.48	162	-28.48	4690638	22	12957
dre-miR-103	c139264_g1_i1	1042	-114.83	156	-17.56	4411492	23	14411
dre-miR-130c-5p	c105570_g1_i1	1042	-123.1	154	-22.78	5140369	22	3942
dre-miR-456	c144182_g2_i2	1042	-150.58	154	-25.06	8101173	22	10675
dre-miR-456	c144182_g2_i3	1042	-150.58	154	-25.06	8102984	22	11038
dre-miR-107a-5p	c141530_g6_i1	1043	-128.16	161	-23.43	4438916	23	3685
dre-miR-107a-5p	c141530_g6_i2	1043	-128.16	161	-23.43	4445851	23	3706
dre-miR-92b-5p	c138756_g1_i4	1044	-142.65	155	-25.01	4044942	24	7984
dre-miR-92b-5p	c138756_g1_i2	1044	-142.65	155	-25.01	4060011	24	8108
dre-miR-92b-5p	c140120_g1_i9	1044	-154.56	164	-27.57	4065329	24	8097
dre-miR-92b-5p	c138756_g1_i5	1044	-142.65	155	-25.01	4069124	24	8366
dre-miR-107a-5p	c140044_g3_i16	1044	-122.46	165	-22.62	4434175	23	13669
dre-miR-124-5p	c132415_g2_i6	1044	-137.73	158	-23.53	4557626	22	6195
dre-miR-133c-3p	c121917_g1_i1	1044	-156.7	161	-26.88	5442191	22	14866
dre-miR-456	c137481_g5_i4	1044	-131.33	164	-21.48	8112138	22	5436
dre-miR-92a-5p	c139693_g3_i1	1046	-146.17	157	-23.9	3965764	23	6890
dre-miR-92b-5p	c142971_g3_i5	1046	-162.71	170	-29.83	4043532	24	15175
dre-miR-92b-5p	c142971_g3_i6	1046	-162.71	170	-29.83	4056004	24	15274
dre-miR-92b-5p	c142971_g3_i4	1046	-162.71	170	-29.83	4068992	24	15322
dre-miR-103	c142975_g1_i1	1046	-128.45	168	-23.76	4395621	23	11738
dre-miR-107a-3p	c142975_g1_i1	1046	-124.13	168	-23.56	4457815	23	11738
dre-miR-153a-5p	c108690_g1_i1	1046	-105.71	156	-16.31	6242244	23	2449
dre-miR-181c-5p	c140760_g1_i3	1046	-141.96	159	-23.96	6375232	22	4857
dre-miR-30e-3p	c135608_g1_i1	1047	-129.42	161	-22.37	3938065	22	8447
dre-miR-96-5p	c137481_g4_i1	1047	-142.15	160	-26.1	4153960	23	5643
dre-miR-107a-5p	c144003_g4_i1	1048	-116.83	162	-22.51	4434113	23	15604
dre-miR-138-5p	c131733_g1_i4	1048	-147.14	166	-24.76	5585228	22	5197
dre-miR-146b	c136133_g1_i2	1048	-121.01	154	-20.55	6060551	22	11235
dre-miR-107a-5p	c129117_g1_i5	1049	-120.06	163	-20.41	4424277	23	7317
dre-miR-107a-5p	c129117_g1_i1	1049	-120.06	163	-20.41	4437028	23	7172
dre-miR-138-5p	c104750_g1_i3	1049	-147.68	161	-23.82	5578179	22	2604
dre-miR-457b-5p	c118007_g1_i1	1050	-124.16	163	-21.92	8168784	22	7024
dre-miR-93	c141730_g1_i1	1051	-124.87	164	-23.69	4116334	22	7189
dre-miR-107a-5p	c138922_g1_i1	1051	-129.66	161	-23.74	4443177	23	7810
dre-miR-138-5p	c139251_g1_i5	1051	-148.07	160	-24.35	5568646	22	4770
dre-miR-138-5p	c139251_g1_i4	1051	-148.07	160	-24.35	5569461	22	4725
dre-miR-456	c138121_g1_i2	1051	-157.08	157	-25.9	8091713	22	6751
dre-miR-456	c138121_g1_i1	1051	-157.08	157	-25.9	8114618	22	6785
dre-miR-457a	c140859_g2_i7	1052	-118.03	160	-19.45	8118109	22	4741
dre-miR-103	c141455_g1_i4	1053	-142.2	161	-23.4	4391664	23	7105
dre-miR-107a-5p	c119519_g2_i2	1053	-120.27	159	-22.37	4419523	23	5324
dre-miR-107a-5p	c119519_g2_i1	1053	-120.27	159	-22.37	4427465	23	5309
dre-miR-107a-3p	c141455_g1_i4	1053	-138.09	161	-21.78	4453858	23	7105
dre-miR-143	c135029_g2_i3	1055	-120.58	158	-19.86	5849477	21	9934
dre-miR-143	c135029_g2_i5	1055	-120.58	158	-19.86	5866430	21	10059
dre-miR-145-5p	c124080_g1_i1	1055	-141.32	169	-29.76	5949420	22	2781
dre-miR-145-5p	c124080_g1_i2	1055	-141.32	169	-29.76	5958153	22	2763
dre-miR-103	c143674_g1_i4	1056	-148.45	175	-25.53	4394627	23	10637
dre-miR-103	c143674_g1_i7	1056	-148.45	175	-25.53	4405807	23	10610
dre-miR-107a-3p	c143674_g1_i4	1056	-151.03	175	-26.72	4456821	23	10637
dre-miR-107a-3p	c143674_g1_i7	1056	-151.03	175	-26.72	4468001	23	10610
dre-miR-129-5p	c142147_g1_i7	1057	-149.45	164	-27.6	4977788	22	18936
dre-miR-457b-5p	c138260_g3_i6	1057	-131.61	167	-26.59	8154297	22	10308
dre-miR-457b-5p	c138260_g3_i7	1057	-131.61	167	-26.59	8176701	22	10216
dre-miR-92b-5p	c143936_g1_i1	1058	-158.37	165	-26.37	4057052	24	9110
dre-miR-456	c142398_g3_i9	1059	-145.22	163	-28.4	8110311	22	9594
dre-miR-456	c137481_g5_i3	1060	-146.06	168	-27.26	8115351	22	5688
dre-miR-29a	c144057_g1_i5	1061	-113.05	163	-19.15	3670546	22	8787
dre-miR-107a-5p	c137680_g1_i2	1063	-133.22	171	-24.11	4428044	23	7536
dre-miR-92b-5p	c137045_g1_i4	1066	-162.16	169	-26.99	4064450	24	13317
dre-miR-146a	c136133_g1_i2	1066	-130.03	162	-20.71	6029454	23	11235
dre-miR-153b-5p	c140793_g1_i1	1067	-108.58	167	-20.6	6187901	22	6516
dre-miR-153a-5p	c135608_g1_i1	1069	-117.26	164	-20.5	6239243	23	8447
dre-miR-338	c133560_g1_i3	1072	-132.29	161	-22.69	7480204	22	14693
dre-miR-338	c133560_g1_i2	1072	-132.29	161	-22.69	7487058	22	14202
dre-miR-141-3p	c142009_g1_i3	1073	-124.32	158	-21.07	5738569	22	11856
dre-miR-200a-3p	c142009_g1_i3	1073	-123.01	158	-20.8	6826964	22	11856
dre-miR-455-3p	c144103_g5_i3	1073	-132.58	167	-20.78	7737146	23	15607
dre-miR-138-5p	c132063_g1_i2	1074	-155.25	174	-25.42	5580571	22	11216
dre-miR-138-5p	c132063_g1_i1	1074	-155.25	174	-25.42	5589432	22	11228
dre-miR-153a-5p	c132733_g1_i1	1074	-136.78	181	-26.81	6227749	23	5894
dre-miR-92b-5p	c133501_g2_i2	1078	-164.55	173	-26.89	4047791	24	8478
dre-miR-140-3p	c142515_g1_i2	1082	-162.26	163	-31.04	5684623	23	14310
dre-miR-30e-3p	c139176_g1_i3	1084	-118.88	166	-21.44	3945065	22	7230
dre-miR-363-5p	c138549_g1_i4	1084	-142.41	168	-27.78	7498172	23	10808
dre-miR-107a-5p	c124916_g1_i3	1088	-132.93	172	-25.02	4428184	23	3402
dre-miR-30e-3p	c137197_g1_i1	1141	-135	145	-19.21	3919573	22	14775
dre-miR-107a-5p	c142807_g1_i4	1143	-135.17	149	-19.65	4421602	23	4222
dre-miR-202-3p	c138907_g1_i4	1144	-163.62	148	-25.89	7008767	22	12870
dre-miR-202-3p	c138907_g1_i3	1144	-163.62	148	-25.89	7019365	22	12903
dre-miR-202-3p	c138907_g1_i1	1144	-163.62	148	-25.89	7022913	22	12957
dre-miR-184	c141720_g1_i4	1145	-166.82	147	-24.4	6437148	22	8396
dre-miR-184	c141720_g1_i1	1145	-166.82	147	-24.4	6448257	22	8381
dre-miR-107a-3p	c127691_g1_i4	1150	-149.17	148	-21.6	4461162	23	6931
dre-miR-107a-3p	c127691_g1_i1	1150	-149.17	148	-21.6	4471359	23	7018
dre-miR-138-5p	c139264_g1_i1	1152	-160.38	152	-24.72	5593178	22	14411
dre-miR-457b-5p	c141321_g1_i1	1152	-131.63	148	-18.9	8148335	22	16276
dre-miR-202-3p	c142971_g3_i5	1154	-152.68	153	-24.22	6997747	22	15175
dre-miR-202-3p	c142971_g3_i6	1154	-152.68	153	-24.22	7010219	22	15274
dre-miR-202-3p	c142971_g3_i4	1154	-152.68	153	-24.22	7023207	22	15322
dre-miR-457a	c141321_g1_i1	1154	-128.79	150	-18.39	8117238	22	16276
dre-miR-92b-5p	c134972_g2_i1	1157	-182.28	149	-29.43	4058109	24	5274
dre-miR-92a-5p	c141035_g1_i2	1160	-168.44	150	-26.44	3955631	23	15922
dre-miR-92a-5p	c141035_g1_i3	1160	-168.44	150	-26.44	3960161	23	15931
dre-miR-92a-5p	c141035_g1_i1	1160	-168.44	150	-26.44	3978373	23	16296
dre-miR-193a-5p	c136470_g1_i1	1162	-162.39	162	-25.92	6557688	22	12129
dre-miR-30e-3p	c133560_g1_i3	1163	-143.93	154	-22.47	3935146	22	14693
dre-miR-30e-3p	c133560_g1_i2	1163	-143.93	154	-22.47	3942000	22	14202
dre-miR-129-5p	c137197_g1_i1	1164	-157.95	149	-25.32	4976871	22	14775
dre-miR-138-5p	c141666_g1_i2	1164	-156.22	155	-21.82	5596464	22	6328
dre-miR-457b-5p	c137481_g4_i1	1165	-134.85	147	-19.51	8165473	22	5643
dre-miR-140-3p	c131995_g1_i1	1166	-188.55	160	-27.36	5660207	23	12919
dre-miR-92b-5p	c132725_g2_i1	1167	-191.51	158	-28.28	4052476	24	3324
dre-miR-107a-5p	c140969_g1_i3	1167	-142.9	151	-24.3	4416907	23	12599
dre-miR-107a-5p	c140969_g1_i1	1167	-142.9	151	-24.3	4434808	23	12425
dre-miR-92b-5p	c141777_g2_i2	1168	-180.58	152	-29.55	4059944	24	10578
dre-miR-138-5p	c129117_g1_i5	1168	-145.87	154	-20.55	5574866	22	7317
dre-miR-138-5p	c129117_g1_i1	1168	-145.87	154	-20.55	5587617	22	7172
dre-miR-125c-3p	c143674_g1_i2	1169	-189.03	154	-31.34	4847279	22	19154
dre-miR-456	c138907_g1_i4	1169	-176.35	156	-25.27	8097162	22	12870
dre-miR-456	c138907_g1_i3	1169	-176.35	156	-25.27	8107760	22	12903
dre-miR-456	c138907_g1_i1	1169	-176.35	156	-25.27	8111308	22	12957
dre-miR-457a	c137481_g4_i1	1169	-136.46	150	-20.14	8134376	22	5643
dre-miR-153b-5p	c137197_g1_i1	1172	-144.39	161	-25.24	6158557	22	14775
dre-miR-153b-5p	c105929_g1_i1	1172	-147.38	157	-22.83	6179894	22	8453
dre-miR-128-3p	c142009_g1_i3	1173	-165.17	153	-25.12	4961144	22	11856
dre-miR-128-3p	c142009_g1_i7	1173	-165.17	153	-25.12	4965476	22	13089
dre-miR-135c	c135608_g1_i1	1174	-137.52	156	-19.6	5492915	22	8447
dre-miR-138-5p	c143437_g2_i3	1174	-172.94	163	-26.5	5595778	22	4996
dre-miR-92b-5p	c143310_g1_i2	1175	-183.53	158	-32.05	4058510	24	10861
dre-miR-457b-5p	c135850_g1_i5	1175	-138.56	154	-22.15	8165293	22	3922
dre-miR-430i-3p	c142147_g1_i7	1176	-135.33	156	-19.3	8056391	22	18936
dre-miR-457a	c142878_g2_i1	1177	-144.45	157	-21.83	8140281	22	11272
dre-miR-92a-5p	c126105_g1_i4	1178	-162.84	172	-26.38	3954339	23	7310
dre-miR-107a-5p	c131225_g1_i3	1178	-138.59	157	-25.15	4424054	23	6681
dre-miR-107a-5p	c131225_g1_i2	1178	-138.59	157	-25.15	4431213	23	7768
dre-miR-124-4-5p	c132415_g2_i6	1178	-148.46	156	-24.05	4588723	22	6195
dre-miR-138-5p	c143266_g1_i6	1179	-167.76	156	-26.43	5583938	22	11489
dre-miR-92b-5p	c141865_g1_i3	1180	-177.83	155	-26.96	4043849	24	8930
dre-miR-125b-2-3p	c133975_g1_i1	1180	-172.04	158	-25.84	4737588	21	6632
dre-miR-153a-5p	c144003_g4_i1	1181	-123.81	163	-19.3	6237739	23	15604
dre-miR-107a-5p	c141254_g1_i1	1182	-129.52	168	-20.06	4417359	23	10075
dre-miR-457b-5p	c144103_g5_i3	1182	-132.54	160	-22.24	8172504	22	15607
dre-miR-30e-3p	c143992_g1_i3	1183	-148.71	156	-22.49	3924362	22	16666
dre-miR-153a-5p	c138876_g1_i1	1183	-141.82	160	-19.82	6227464	23	7140
dre-miR-455-3p	c125928_g1_i2	1183	-135.14	159	-18.4	7728997	23	8891
dre-miR-455-3p	c125928_g1_i1	1183	-135.14	159	-18.4	7735665	23	8877
dre-miR-122	c138655_g1_i2	1184	-146.62	158	-23.25	4505117	22	4502
dre-miR-138-5p	c141254_g1_i1	1185	-165.95	167	-26.49	5567948	22	10075
dre-miR-193a-3p	c142971_g3_i5	1186	-153.64	162	-25.57	6562389	22	15175
dre-miR-193a-3p	c142971_g3_i6	1186	-153.64	162	-25.57	6574861	22	15274
dre-miR-193a-3p	c142971_g3_i4	1186	-153.64	162	-25.57	6587849	22	15322
dre-miR-107a-5p	c132376_g1_i1	1187	-137.73	158	-24.94	4440579	23	4293
dre-miR-92b-5p	c133834_g1_i1	1188	-198.12	156	-28.43	4052071	24	9066
dre-miR-107a-5p	c129117_g1_i3	1189	-135.91	163	-20.41	4423508	23	8307
dre-miR-107a-3p	c139264_g1_i1	1189	-133.59	156	-18.67	4473686	23	14411
dre-miR-152	c143674_g1_i2	1189	-150.87	158	-25.55	6153353	22	19154
dre-miR-456	c115749_g1_i1	1189	-189.63	167	-28.99	8089521	22	4117
dre-miR-456	c115749_g1_i2	1189	-189.63	167	-28.99	8104145	22	3247
dre-miR-130c-3p	c143379_g1_i6	1190	-131.51	160	-19.26	5170170	22	10708
dre-miR-130c-3p	c143379_g1_i8	1190	-131.51	160	-19.26	5187436	22	10691
dre-miR-138-5p	c131733_g1_i2	1190	-167.55	166	-24.76	5571392	22	5173
dre-miR-138-5p	c126105_g1_i3	1190	-173.64	157	-28.69	5575935	22	4568
dre-miR-138-5p	c126105_g1_i2	1190	-173.64	157	-28.69	5589598	22	4553
dre-miR-138-5p	c131733_g1_i5	1190	-167.55	166	-24.76	5592054	22	5263
dre-miR-92b-5p	c141541_g3_i8	1191	-175.65	159	-29.87	4061707	24	5609
dre-miR-92b-5p	c136616_g1_i2	1193	-188.59	172	-29.26	4043629	24	8859
dre-miR-92b-5p	c134971_g1_i3	1193	-166.05	161	-26.45	4061971	24	8092
dre-miR-92b-5p	c134971_g1_i2	1193	-166.05	161	-26.45	4070763	24	6369
dre-miR-216b	c142378_g1_i8	1193	-143.56	167	-21.56	7204865	22	14547
dre-miR-138-5p	c126105_g1_i4	1198	-181.91	163	-26.01	5571383	22	7310
dre-miR-457a	c142861_g1_i4	1200	-129.83	162	-18.66	8128355	22	15464
dre-miR-457a	c142861_g1_i2	1200	-129.83	162	-18.66	8145361	22	15416
dre-miR-153c-5p	c132897_g1_i1	1201	-134.92	172	-21.64	6296533	22	8280
dre-miR-92a-5p	c143992_g1_i10	1203	-166.1	158	-24.74	3960812	23	17180
dre-miR-92a-5p	c136968_g5_i2	1204	-162.09	161	-24.33	3955706	23	9053
dre-miR-92a-5p	c136968_g5_i3	1204	-162.09	161	-24.33	3964625	23	10003
dre-miR-457a	c99099_g1_i2	1205	-135.86	162	-19.04	8116942	22	8423
dre-miR-457a	c99099_g1_i1	1205	-135.86	162	-19.04	8147264	22	8348
dre-miR-27e	c125928_g1_i1	1206	-149.03	156	-22.43	3630861	22	8877
dre-miR-457a	c130465_g1_i7	1206	-128.97	162	-18.37	8126278	22	4635
dre-miR-457a	c130465_g1_i5	1206	-128.97	162	-18.37	8143017	22	4455
dre-miR-457a	c142995_g1_i3	1209	-130.42	168	-19.52	8137857	22	10626
dre-miR-153a-5p	c132897_g1_i1	1211	-141.53	183	-25.78	6234339	23	8280
dre-miR-457a	c138759_g1_i3	1211	-138.76	160	-21.93	8138286	22	8028
dre-miR-138-5p	c138749_g1_i6	1212	-174.31	167	-25.66	5572788	22	3086
dre-miR-138-5p	c138749_g1_i4	1212	-174.31	167	-25.66	5578894	22	3044
dre-miR-138-5p	c138749_g1_i9	1212	-174.31	167	-25.66	5589275	22	3029
dre-miR-153b-5p	c137630_g1_i4	1215	-144.04	164	-24.97	6186176	22	3324
dre-miR-107a-5p	c122270_g1_i1	1217	-140.76	165	-20.25	4439158	23	6765
dre-miR-107a-5p	c122270_g1_i3	1217	-140.76	165	-20.25	4445688	23	6641
dre-miR-216b	c144003_g4_i1	1218	-151.3	164	-22.9	7201746	22	15604
dre-miR-133c-5p	c137481_g5_i4	1222	-153.02	163	-21.91	5437796	22	5436
dre-miR-141-3p	c142009_g1_i5	1223	-142.36	158	-21.07	5724973	22	13098
dre-miR-141-3p	c142009_g1_i7	1223	-142.36	158	-21.07	5742901	22	13089
dre-miR-200a-3p	c142009_g1_i5	1223	-140.78	158	-20.8	6813368	22	13098
dre-miR-200a-3p	c142009_g1_i7	1223	-140.78	158	-20.8	6831296	22	13089
dre-miR-138-5p	c136306_g1_i1	1224	-144.56	161	-21.96	5576551	22	3735
dre-miR-456	c142398_g3_i8	1224	-169.19	165	-28.4	8115619	22	10464
dre-miR-107a-5p	c140044_g3_i3	1236	-151.24	168	-24.63	4416525	23	13083
dre-miR-107a-5p	c140044_g3_i8	1236	-151.24	168	-24.63	4416580	23	12294
dre-miR-107a-5p	c140044_g3_i6	1236	-151.24	168	-24.63	4419767	23	12560
dre-miR-107a-5p	c140044_g3_i10	1236	-151.24	168	-24.63	4442276	23	12533
dre-miR-457a	c122394_g1_i1	1249	-139.59	163	-19.38	8125262	22	4638
dre-miR-181c-5p	c132415_g2_i6	1250	-163.12	176	-29.01	6392349	22	6195
dre-miR-92b-5p	c132837_g1_i4	1285	-203.27	146	-25.64	4057311	24	6117
dre-miR-122	c140377_g1_i2	1296	-194.35	152	-27.2	4491970	22	5898
dre-miR-457b-5p	c141413_g1_i3	1298	-154.04	150	-21.35	8156197	22	7361
dre-miR-30a-3p	c133475_g1_i1	1303	-154.63	150	-20.37	3738565	22	5782
dre-miR-193b-3p	c142971_g3_i5	1303	-152.08	150	-18.63	6624583	22	15175
dre-miR-193b-3p	c142971_g3_i6	1303	-152.08	150	-18.63	6637055	22	15274
dre-miR-193b-3p	c142971_g3_i4	1303	-152.08	150	-18.63	6650043	22	15322
dre-miR-92b-5p	c140184_g1_i5	1307	-205.61	161	-26.12	4049686	24	6981
dre-miR-92b-5p	c140184_g1_i4	1307	-205.61	161	-26.12	4050814	24	7182
dre-miR-103	c143992_g1_i10	1307	-186.98	152	-25.35	4396170	23	17180
dre-miR-107a-3p	c143992_g1_i10	1307	-185.87	152	-25.08	4458364	23	17180
dre-miR-128-3p	c121917_g1_i1	1309	-171.06	154	-22.99	4944639	22	14866
dre-miR-138-5p	c144103_g5_i3	1309	-177.34	153	-25.79	5591453	22	15607
dre-miR-130c-5p	c137197_g1_i1	1311	-155.16	155	-19.54	5132356	22	14775
dre-miR-128-3p	c142009_g1_i5	1313	-191.77	153	-26.6	4947548	22	13098
dre-miR-457a	c135850_g1_i4	1314	-162.1	154	-22.35	8133964	22	3736
dre-miR-457a	c135850_g1_i5	1314	-162.1	154	-22.35	8134196	22	3922
dre-miR-92b-5p	c134972_g2_i2	1315	-196.43	153	-29.43	4061746	24	5212
dre-miR-456	c142009_g1_i5	1316	-183.06	163	-24.07	8088345	22	13098
dre-miR-456	c142009_g1_i3	1316	-183.06	163	-24.07	8101941	22	11856
dre-miR-456	c142009_g1_i7	1316	-183.06	163	-24.07	8106273	22	13089
dre-miR-338	c141035_g1_i2	1320	-176.79	153	-25.2	7469592	22	15922
dre-miR-338	c141035_g1_i3	1320	-176.79	153	-25.2	7474122	22	15931
dre-miR-338	c141035_g1_i1	1320	-176.79	153	-25.2	7492334	22	16296
dre-miR-107a-5p	c143992_g1_i3	1321	-182	157	-23.35	4421914	23	16666
dre-miR-457a	c144161_g1_i4	1321	-141.18	159	-18.17	8140880	22	14716
dre-miR-92b-5p	c140492_g1_i4	1322	-211.78	157	-31.05	4050399	24	5622
dre-miR-92b-5p	c140492_g1_i2	1322	-211.78	157	-31.05	4070311	24	5756
dre-miR-107a-5p	c132897_g1_i1	1322	-159.19	160	-25.32	4430713	23	8280
dre-miR-107a-5p	c143992_g1_i10	1325	-167.83	157	-23.06	4427267	23	17180
dre-miR-30a-3p	c143992_g1_i3	1327	-168.93	159	-23.58	3737780	22	16666
dre-miR-92b-5p	c135413_g3_i7	1327	-204.62	156	-26.34	4051873	24	9104
dre-miR-92b-5p	c135413_g3_i9	1327	-204.62	156	-26.34	4061380	24	9095
dre-miR-122	c133834_g1_i1	1328	-185.19	155	-24.19	4487429	22	9066
dre-miR-122	c138655_g1_i3	1333	-165.39	158	-23.25	4479524	22	4646
dre-miR-122	c138655_g1_i1	1333	-165.39	158	-23.25	4494261	22	4634
dre-miR-138-5p	c142147_g1_i7	1334	-173.83	163	-24.53	5568631	22	18936
dre-miR-92b-5p	c137690_g1_i1	1336	-199.17	169	-27.75	4069666	24	5975
dre-miR-122	c132837_g1_i4	1336	-166.87	163	-22.66	4492669	22	6117
dre-miR-456	c141321_g1_i1	1337	-202.23	168	-26.74	8086141	22	16276
dre-miR-30a-3p	c142264_g1_i1	1339	-175.29	162	-25.08	3755211	22	7215
dre-miR-125a	c137481_g4_i1	1341	-195.65	158	-30.26	4651512	22	5643
dre-miR-138-5p	c136699_g1_i2	1344	-177.22	157	-23.69	5587553	22	9373
dre-miR-107a-5p	c142264_g1_i1	1346	-174.85	156	-26.8	4439345	23	7215
dre-miR-125b-5p	c137481_g4_i1	1347	-173.98	165	-24.87	4682609	22	5643
dre-miR-125c-5p	c137481_g4_i1	1352	-182.83	165	-25.35	4806997	22	5643
dre-miR-153b-5p	c137630_g1_i7	1355	-161.28	164	-24.97	6157611	22	4719
dre-miR-153b-5p	c137630_g1_i5	1355	-161.28	164	-24.97	6178050	22	4619
dre-miR-92b-5p	c121917_g1_i1	1357	-185.41	163	-22.63	4042826	24	14866
dre-miR-92b-5p	c140499_g6_i7	1359	-207.89	160	-26.46	4068107	24	5879
dre-miR-457a	c138260_g3_i6	1359	-167.74	159	-26.41	8123200	22	10308
dre-miR-457a	c138260_g3_i7	1359	-167.74	159	-26.41	8145604	22	10216
dre-miR-457a	c142995_g1_i4	1363	-146.53	168	-19.52	8125874	22	11523
dre-miR-107a-5p	c142147_g1_i7	1386	-165	161	-22.29	4418042	23	18936
dre-miR-457b-5p	c130465_g1_i7	1394	-152.85	166	-20.13	8157375	22	4635
dre-miR-457b-5p	c130465_g1_i5	1394	-152.85	166	-20.13	8174114	22	4455
dre-miR-27e	c142009_g1_i7	1455	-180.97	158	-21.69	3628305	22	13089
dre-miR-145-5p	c142147_g1_i7	1455	-213.7	160	-32.5	5941795	22	18936
dre-miR-107a-5p	c144604_g3_i5	1457	-172.76	159	-22.34	4442806	23	7306
dre-miR-138-5p	c129117_g1_i3	1467	-183.32	159	-20.55	5574097	22	8307
dre-miR-92a-5p	c126105_g1_i3	1487	-198.7	172	-26.38	3958891	23	4568
dre-miR-92a-5p	c126105_g1_i2	1487	-198.7	172	-26.38	3972554	23	4553
dre-miR-457b-5p	c141413_g1_i1	1583	-184.79	150	-21.35	8176716	22	6575
dre-miR-92b-5p	c142631_g1_i1	1591	-257.28	154	-27.9	4068966	24	11453
dre-miR-107a-5p	c144604_g3_i1	1603	-186.28	159	-20.72	4446162	23	7315
dre-miR-456	c143674_g1_i2	1607	-215.91	162	-28.21	8112464	22	19154
dre-miR-456	c142586_g3_i10	1608	-232.31	154	-28.71	8089746	22	11052
dre-miR-30a-3p	c133560_g1_i3	1617	-199.4	156	-23.08	3748564	22	14693
dre-miR-30a-3p	c133560_g1_i2	1617	-199.4	156	-23.08	3755418	22	14202
dre-miR-457a	c142831_g3_i1	1622	-188.76	155	-19.66	8143638	22	15923
dre-miR-138-5p	c134590_g2_i2	1627	-229.4	156	-27.03	5584430	22	14424
dre-miR-107a-5p	c141035_g1_i2	1629	-197.83	156	-27.31	4422086	23	15922
dre-miR-107a-5p	c141035_g1_i3	1629	-197.83	156	-27.31	4426616	23	15931
dre-miR-107a-5p	c141035_g1_i1	1629	-197.83	156	-27.31	4444828	23	16296
dre-miR-107a-5p	c133560_g1_i3	1641	-203.99	163	-22.73	4432698	23	14693
dre-miR-107a-5p	c133560_g1_i2	1641	-203.99	163	-22.73	4439552	23	14202
dre-miR-103	c143674_g1_i2	1642	-236.81	175	-30.09	4411921	23	19154
dre-miR-107a-3p	c143674_g1_i2	1642	-230.42	175	-26.72	4474115	23	19154
dre-miR-125b-5p	c137481_g4_i4	1642	-222.57	165	-25.65	4688198	22	5621
dre-miR-125c-5p	c137481_g4_i4	1644	-224.76	165	-25.35	4812586	22	5621
dre-miR-122	c137690_g1_i1	1648	-230.7	175	-32.8	4505024	22	5975
dre-miR-125a	c137481_g4_i4	1655	-248.1	159	-30.26	4657101	22	5621
dre-miR-145-5p	c133560_g1_i2	1656	-188.8	163	-21	5963305	22	14202
dre-miR-138-5p	c142473_g2_i1	1666	-228.11	164	-25.25	5579659	22	10250
dre-miR-138-5p	c142473_g2_i2	1666	-228.11	164	-25.25	5589213	22	9926
dre-miR-457b-5p	c142088_g1_i2	1666	-183.23	160	-20.5	8157090	22	9730
dre-miR-457a	c131995_g1_i1	1668	-192.45	166	-19.46	8116870	22	12919
dre-miR-184	c142828_g2_i4	1721	-265.08	152	-24.59	6438639	22	5102
dre-miR-107a-5p	c136470_g1_i1	1738	-201.52	153	-20.19	4443092	23	12129
dre-miR-107a-5p	c144604_g3_i4	1743	-205.26	159	-20.72	4425212	23	7294
dre-miR-92b-5p	c143611_g1_i1	1765	-282.2	159	-27.11	4056713	24	13732
dre-miR-138-5p	c137481_g5_i3	1778	-251.41	161	-24.97	5596494	22	5688
dre-miR-153a-5p	c137197_g1_i1	1785	-203.84	159	-21.22	6220751	23	14775
dre-miR-138-5p	c134239_g1_i1	1790	-241.13	160	-25.35	5568330	22	6373
dre-miR-145-5p	c133560_g1_i3	1799	-216.37	163	-27.57	5956451	22	14693
dre-miR-30a-3p	c135608_g1_i1	1823	-222.39	174	-23.56	3751483	22	8447
dre-miR-107a-5p	c137197_g1_i1	1898	-229.98	156	-20.63	4417125	23	14775
dre-miR-138-5p	c242491_g1_i1	1919	-248.4	155	-24.43	5568505	22	2545
dre-miR-145-5p	c143992_g1_i10	1922	-254.8	157	-26.1	5951020	22	17180
dre-miR-145-5p	c143992_g1_i3	1935	-255.37	166	-26.1	5945667	22	16666
dre-miR-138-5p	c141321_g1_i1	2044	-301.74	157	-25.32	5567284	22	16276
dre-miR-457a	c141413_g1_i1	2060	-231.72	159	-20.31	8145619	22	6575
dre-miR-92b-5p	c141457_g1_i2	2071	-320.13	161	-28.61	4057629	24	12341
dre-miR-92b-5p	c141457_g1_i5	2071	-320.13	161	-28.61	4060922	24	12386
dre-miR-457a	c141413_g1_i3	2078	-231.77	160	-20.31	8125100	22	7361
dre-miR-153b-5p	c132897_g1_i1	2094	-227.21	168	-19.39	6172145	22	8280
dre-miR-107a-5p	c136961_g1_i1	2218	-248.97	159	-23.49	4444069	23	7357
dre-miR-138-5p	c137481_g5_i4	2376	-336.76	162	-25.67	5593281	22	5436
dre-miR-29b	c137481_g4_i4	2524	-315.98	172	-25.54	3661997	22	5621
dre-miR-457a	c142088_g1_i2	2579	-284.14	170	-21.68	8125993	22	9730
dre-miR-29b	c137481_g4_i7	2638	-319.32	166	-25.76	3668840	22	5449
dre-miR-29b	c137481_g4_i6	2649	-326.28	166	-25.76	3644631	22	4527
dre-miR-29b	c137481_g4_i5	2670	-325.6	172	-25.76	3655630	22	5657
dre-miR-107a-5p	c139264_g1_i1	2678	-323.19	163	-22.18	4442589	23	14411
dre-miR-29b	c137481_g4_i1	2806	-345.13	172	-23.49	3656408	22	5643
dre-miR-29a	c137481_g4_i7	2897	-342.55	162	-24.61	3699937	22	5449
dre-miR-29a	c137481_g4_i5	2925	-348.3	168	-24.61	3686727	22	5657
dre-miR-29a	c137481_g4_i4	2925	-356.04	168	-24.61	3693094	22	5621
dre-miR-29a	c137481_g4_i6	3047	-366.9	162	-24.61	3675728	22	4527
dre-miR-29a	c137481_g4_i1	3228	-391.66	168	-22.45	3687505	22	5643
dre-miR-34c-5p	c142009_g1_i5	1000	-119.13	150	-20.61	9207837	23	13098
dre-miR-139-3p	c137905_g1_i12	1001	-157.88	149	-27.44	8748783	23	7222
dre-miR-139-3p	c140499_g6_i7	1002	-162.62	147	-26.73	8763754	23	5879
dre-miR-15c	c126471_g3_i2	1004	-144.63	150	-23.85	9422048	21	5656
dre-miR-489	c144266_g1_i6	1005	-129.06	146	-20.34	8455951	23	8610
dre-miR-139-3p	c132814_g1_i1	1006	-162.99	160	-30.55	8764415	23	4702
dre-miR-34b	c142878_g2_i1	1007	-125.07	154	-25.26	8637833	23	11272
dre-miR-139-3p	c135885_g4_i6	1007	-180.78	149	-29.39	8752536	23	9921
dre-miR-139-3p	c143266_g1_i6	1008	-186.94	156	-30.61	8755832	23	11489
dre-miR-34c-5p	c143992_g2_i1	1008	-133.47	161	-23.03	9217588	23	12600
dre-miR-139-3p	c80372_g1_i1	1009	-181.54	152	-29.65	8753118	23	1939
dre-miR-2196	c140272_g1_i6	1010	-150.3	152	-28.18	10152192	24	5670
dre-miR-2196	c140272_g1_i4	1010	-150.3	152	-28.18	10165558	24	5771
dre-let-7j	c133592_g1_i3	1011	-123.89	158	-21.39	8470329	22	8463
dre-let-7j	c133592_g1_i2	1011	-123.89	158	-21.39	8477979	22	8677
dre-miR-730	c140044_g3_i16	1011	-141.53	157	-29.2	9285307	23	13669
dre-miR-139-3p	c136759_g1_i8	1012	-178.07	150	-33.28	8764359	23	5520
dre-miR-2193	c122296_g1_i1	1014	-114.79	156	-21.73	10471353	24	5318
dre-miR-2195	c142971_g3_i5	1014	-138.33	150	-23.61	10511708	21	15175
dre-miR-2195	c142971_g3_i6	1014	-138.33	150	-23.61	10524180	21	15274
dre-miR-2195	c142971_g3_i4	1014	-138.33	150	-23.61	10537168	21	15322
dre-miR-139-3p	c140044_g3_i16	1015	-152.6	154	-25.37	8756658	23	13669
dre-miR-139-3p	c142971_g3_i4	1015	-165.47	156	-28.36	8764639	23	15322
dre-miR-2195	c116292_g1_i2	1015	-135.42	150	-22	10528118	21	5389
dre-miR-139-3p	c126164_g1_i1	1016	-169.22	152	-27.2	8761159	23	7901
dre-miR-730	c132897_g1_i1	1016	-122.76	151	-21.6	9281845	23	8280
dre-miR-2196	c135985_g1_i2	1016	-151.01	160	-25.8	10148940	24	4941
dre-miR-139-3p	c139323_g3_i4	1018	-187.48	149	-35.93	8744928	23	5005
dre-miR-2188-3p	c132837_g1_i4	1019	-114.88	154	-19.63	10338905	21	6117
dre-miR-139-3p	c140163_g1_i2	1020	-176.8	157	-30.74	8746169	23	5096
dre-miR-139-3p	c137544_g1_i2	1020	-189.5	158	-32.66	8750761	23	4282
dre-miR-139-3p	c122665_g1_i3	1020	-179.04	151	-31.85	8760084	23	5693
dre-miR-2196	c132023_g1_i2	1020	-146.47	162	-25.95	10162478	24	7788
dre-miR-34b	c143898_g2_i1	1021	-136.35	158	-21.17	8625738	23	4577
dre-miR-139-3p	c133747_g1_i6	1021	-178.63	154	-32.51	8752111	23	3484
dre-miR-34c-5p	c140143_g1_i3	1021	-133.96	149	-21.03	9206405	23	12715
dre-miR-2196	c140569_g4_i3	1021	-132.43	155	-21.82	10159576	24	5911
dre-miR-1788-5p	c138907_g1_i4	1022	-110.01	152	-18.89	9869691	22	12870
dre-miR-1788-5p	c138907_g1_i3	1022	-110.01	152	-18.89	9880289	22	12903
dre-miR-1788-5p	c138907_g1_i1	1022	-110.01	152	-18.89	9883837	22	12957
dre-miR-2196	c121917_g1_i1	1022	-162.21	151	-33.52	10137838	24	14866
dre-miR-2196	c143853_g5_i3	1022	-152.27	159	-28.06	10142963	24	4220
dre-miR-2196	c143853_g5_i2	1022	-152.27	159	-28.06	10151647	24	4451
dre-miR-2196	c137601_g1_i1	1023	-157.82	163	-27.86	10167215	24	5966
dre-miR-139-3p	c88170_g1_i2	1024	-173.31	164	-27.16	8739325	23	2281
dre-miR-139-3p	c132100_g1_i2	1024	-157.52	157	-27.24	8745388	23	5826
dre-miR-730	c141020_g1_i1	1024	-133.69	160	-25.74	9283364	23	6108
dre-miR-2185-5p	c141321_g1_i1	1024	-144.19	152	-27.55	9703185	21	16276
dre-miR-139-3p	c141347_g1_i1	1025	-199.67	157	-33.33	8764748	23	9023
dre-miR-107b	c141035_g1_i2	1025	-123.65	154	-22.56	10050643	21	15922
dre-miR-107b	c141035_g1_i3	1025	-123.65	154	-22.56	10055173	21	15931
dre-miR-107b	c141035_g1_i1	1025	-123.65	154	-22.56	10073385	21	16296
dre-miR-139-3p	c141864_g2_i3	1026	-184.38	157	-31.83	8758013	23	6029
dre-miR-34c-5p	c105231_g1_i2	1026	-134.89	162	-24.29	9209049	23	2168
dre-miR-34c-5p	c141413_g1_i1	1026	-125.34	151	-22.18	9234014	23	6575
dre-miR-107b	c48353_g1_i1	1026	-121.8	157	-21.87	10060136	21	2727
dre-miR-2196	c138655_g1_i3	1026	-172.16	151	-29.54	10139178	24	4646
dre-miR-2196	c138655_g1_i1	1026	-172.16	151	-29.54	10153915	24	4634
dre-miR-2196	c138966_g2_i3	1026	-152.25	157	-28.48	10167782	24	11737
dre-miR-139-3p	c141044_g4_i1	1027	-178.45	154	-31.73	8745654	23	8107
dre-miR-34c-5p	c141035_g1_i1	1027	-126.41	153	-26.17	9233766	23	16296
dre-miR-2185-5p	c138749_g1_i9	1027	-141.19	154	-26.09	9725176	21	3029
dre-miR-1788-5p	c132897_g1_i1	1027	-113.4	160	-17.72	9872688	22	8280
dre-miR-2196	c140626_g2_i2	1027	-165.42	160	-28.31	10138269	24	9032
dre-miR-7146-3p	c137481_g4_i4	1027	-143.07	155	-24.16	10689919	22	5621
dre-miR-1306	c126164_g1_i1	1027	-168.52	156	-30.25	10875755	22	7901
dre-miR-725-3p	c131615_g1_i2	1028	-119.93	152	-20.24	9045603	22	5974
dre-miR-2193	c141149_g1_i4	1028	-118.35	155	-18.36	10472038	24	5065
dre-miR-139-3p	c135971_g1_i1	1029	-179.68	158	-29.4	8749809	23	7339
dre-miR-2196	c144003_g4_i1	1029	-141.08	154	-26.44	10155961	24	15604
dre-miR-2196	c140084_g5_i5	1030	-134.95	155	-24.68	10157530	24	6301
dre-miR-2196	c140084_g5_i3	1030	-134.95	155	-24.68	10162852	24	6445
dre-miR-2196	c140648_g8_i4	1030	-142.44	153	-27.59	10163844	24	7053
dre-miR-2196	c140648_g8_i3	1030	-142.44	153	-27.59	10165142	24	6577
dre-miR-459-5p	c131995_g1_i1	1031	-129.81	151	-20.22	8272355	22	12919
dre-miR-107b	c142975_g1_i1	1031	-120.44	158	-20.47	10055275	21	11738
dre-miR-2196	c135676_g1_i1	1031	-148.49	160	-27.94	10146811	24	8433
dre-miR-2196	c135676_g1_i2	1031	-148.49	160	-27.94	10166789	24	8487
dre-miR-1388-3p	c143674_g1_i2	1032	-129.24	158	-24.63	9853896	22	19154
dre-miR-2196	c115505_g1_i1	1032	-169.98	157	-30.33	10145396	24	4181
dre-miR-2196	c115505_g1_i3	1032	-169.98	157	-30.33	10158559	24	4262
dre-miR-34b	c138570_g2_i3	1033	-134.56	152	-21.05	8617111	23	11243
dre-miR-34b	c138570_g2_i4	1033	-134.56	152	-21.05	8622179	23	10112
dre-miR-34b	c138570_g2_i5	1033	-134.56	152	-21.05	8638342	23	10238
dre-miR-34b	c138570_g2_i2	1033	-134.56	152	-21.05	8644150	23	10732
dre-miR-139-3p	c115810_g1_i3	1033	-180.55	159	-29.98	8767743	23	9257
dre-miR-2196	c140684_g2_i1	1033	-147.98	157	-25.15	10167402	24	6906
dre-miR-34b	c136375_g2_i4	1034	-148.62	164	-26.36	8628621	23	7650
dre-miR-34b	c136375_g2_i1	1034	-148.62	164	-26.36	8630150	23	7704
dre-miR-2185-5p	c138749_g1_i6	1034	-148.86	154	-26.09	9708689	21	3086
dre-miR-2185-5p	c138749_g1_i4	1034	-148.86	154	-26.09	9714795	21	3044
dre-miR-2196	c140123_g1_i2	1034	-151.32	157	-23.54	10167422	24	4513
dre-miR-15c	c124333_g1_i2	1035	-131.01	155	-27.79	9406057	21	5471
dre-miR-1388-5p	c140377_g1_i2	1035	-122.89	160	-22.47	9809557	22	5898
dre-miR-1388-3p	c138759_g1_i3	1035	-141	151	-27.26	9848621	22	8028
dre-miR-1306	c141455_g1_i4	1035	-169	154	-30.79	10859840	22	7105
dre-miR-34c-5p	c115810_g1_i3	1036	-133.77	163	-24.21	9234198	23	9257
dre-miR-15c	c136242_g1_i2	1036	-137.36	156	-23.79	9391926	21	8113
dre-miR-15c	c136242_g1_i1	1036	-137.36	156	-23.79	9400982	21	8134
dre-miR-2196	c141094_g1_i2	1036	-162.16	163	-29.83	10142745	24	4097
dre-miR-2196	c142031_g1_i4	1036	-148.78	158	-31.92	10148053	24	7836
dre-miR-2196	c142031_g1_i1	1036	-148.78	158	-31.92	10155081	24	8010
dre-miR-2196	c135031_g1_i2	1036	-131.2	158	-22.58	10167331	24	8095
dre-miR-2196	c140603_g9_i4	1037	-136.4	161	-21.81	10144043	24	6225
dre-miR-2196	c134622_g1_i7	1037	-163.86	156	-29.58	10165615	24	5066
dre-miR-7146-3p	c137481_g4_i5	1038	-143.46	155	-24.16	10683552	22	5657
dre-miR-7146-3p	c137481_g4_i7	1038	-143.46	155	-24.16	10696762	22	5449
dre-miR-135a	c127816_g1_i1	1039	-123.29	156	-23.65	8696169	23	4096
dre-miR-139-3p	c4701_g1_i1	1039	-186.42	172	-36.93	8760071	23	2635
dre-miR-2196	c116300_g2_i3	1039	-158.31	155	-26.46	10144676	24	5176
dre-miR-2196	c136375_g2_i4	1039	-155.12	159	-29.72	10152374	24	7650
dre-miR-2196	c136375_g2_i1	1039	-155.12	159	-29.72	10153903	24	7704
dre-miR-15c	c140431_g1_i6	1040	-144.49	165	-26.3	9393068	21	4180
dre-miR-2196	c133394_g2_i1	1040	-156.32	162	-26	10160963	24	5555
dre-miR-34b	c128960_g1_i1	1041	-144.35	169	-27.31	8619667	23	6128
dre-miR-139-3p	c139118_g1_i2	1041	-185.3	161	-30.11	8766748	23	4970
dre-miR-1306	c142515_g1_i2	1041	-165.89	157	-32.65	10877822	22	14310
dre-miR-139-3p	c92347_g1_i1	1042	-181.21	164	-34.82	8752660	23	3891
dre-miR-2196	c140044_g3_i8	1042	-147.04	172	-30.03	10138428	24	12294
dre-miR-2196	c140143_g1_i3	1042	-151.08	160	-25.98	10139315	24	12715
dre-miR-2196	c138583_g1_i2	1042	-149.69	159	-28.31	10140373	24	6294
dre-miR-139-3p	c138630_g1_i1	1043	-180.57	162	-31.04	8768153	23	3294
dre-miR-2196	c138942_g4_i2	1044	-150.53	160	-25.68	10143280	24	4030
dre-miR-2196	c124021_g1_i4	1044	-153.92	157	-25.19	10163798	24	4429
dre-miR-107b	c143674_g1_i4	1045	-147.71	175	-26.04	10054281	21	10637
dre-miR-107b	c143674_g1_i7	1045	-147.71	175	-26.04	10065461	21	10610
dre-miR-139-3p	c134899_g2_i1	1046	-165.74	167	-30.39	8743839	23	8392
dre-miR-139-3p	c134899_g2_i2	1046	-165.74	167	-30.39	8755706	23	8129
dre-miR-34c-5p	c117161_g1_i1	1046	-135.43	168	-24.25	9228571	23	11620
dre-miR-2196	c141897_g2_i2	1046	-145.21	161	-25.62	10167589	24	6106
dre-miR-730	c143992_g2_i1	1047	-142.85	166	-25.59	9279782	23	12600
dre-miR-2193	c140990_g4_i1	1047	-128.61	163	-23.51	10473818	24	1356
dre-miR-1788-3p	c121917_g1_i1	1048	-136.31	161	-26.1	9889062	21	14866
dre-miR-2196	c142971_g3_i5	1048	-177.79	161	-35.72	10138544	24	15175
dre-miR-2196	c131553_g1_i2	1048	-146.35	156	-25	10141246	24	8298
dre-miR-2196	c133622_g2_i4	1048	-157.46	171	-30.98	10145501	24	6377
dre-miR-2196	c131553_g1_i3	1048	-146.35	156	-25	10145578	24	8355
dre-miR-2196	c142971_g3_i6	1048	-177.79	161	-35.72	10151016	24	15274
dre-miR-2196	c140896_g4_i1	1048	-141.31	164	-28.59	10159533	24	4479
dre-miR-2196	c142971_g3_i4	1048	-177.79	161	-35.72	10164004	24	15322
dre-miR-2196	c142298_g1_i1	1049	-169.78	163	-28.21	10152030	24	5440
dre-miR-2196	c142378_g1_i3	1049	-151.6	160	-28.11	10153532	24	14655
dre-miR-2196	c142378_g1_i8	1049	-151.6	160	-28.11	10159080	24	14547
dre-miR-1306	c104641_g1_i1	1049	-181.33	159	-32.46	10856786	22	2567
dre-miR-15c	c140315_g2_i2	1050	-136.08	159	-24.89	9394494	21	5388
dre-miR-2193	c129371_g1_i2	1050	-118.74	167	-20.32	10451012	24	6401
dre-miR-2193	c129371_g1_i1	1050	-118.74	167	-20.32	10475481	24	6386
dre-miR-730	c38568_g1_i1	1051	-133.05	164	-23.49	9269424	23	4057
dre-miR-1306	c120045_g2_i1	1051	-171.89	171	-31.33	10865835	22	1389
dre-miR-2196	c137884_g1_i4	1052	-153.63	157	-28.18	10144325	24	5617
dre-miR-2196	c142289_g1_i1	1052	-158.95	164	-31.18	10150377	24	9104
dre-miR-2196	c136633_g1_i3	1053	-163.97	160	-31.41	10164127	24	2284
dre-miR-2196	c139886_g1_i4	1054	-165.03	164	-28.51	10148738	24	8357
dre-miR-1788-3p	c136575_g1_i2	1055	-133.74	163	-24.7	9896157	21	8496
dre-miR-1788-3p	c136575_g1_i3	1055	-133.74	163	-24.7	9901416	21	8399
dre-miR-1788-3p	c136575_g1_i4	1055	-133.74	163	-24.7	9905707	21	8515
dre-miR-2196	c133915_g1_i5	1055	-174.73	157	-33.35	10147378	24	5583
dre-miR-34b	c121917_g1_i1	1056	-144.99	162	-27.65	8614085	23	14866
dre-miR-34b	c139500_g1_i1	1056	-132.63	173	-22.45	8644437	23	9061
dre-miR-139-3p	c129810_g1_i2	1056	-172.26	165	-32.32	8756300	23	6172
dre-miR-2196	c140044_g3_i16	1056	-147.34	163	-30.83	10156023	24	13669
dre-miR-1388-3p	c136699_g1_i2	1057	-138.44	160	-25.55	9847842	22	9373
dre-miR-34b	c142971_g3_i5	1058	-135.66	159	-24.29	8614791	23	15175
dre-miR-727-3p	c141321_g1_i1	1058	-131.46	171	-25.64	9112342	22	16276
dre-miR-2196	c121753_g1_i1	1059	-149.28	161	-28.39	10144098	24	4681
dre-miR-2196	c13376_g1_i1	1059	-143.6	158	-26.57	10148386	24	4747
dre-miR-2196	c141977_g6_i4	1059	-152.13	165	-33.46	10149340	24	5936
dre-miR-2196	c128755_g1_i1	1060	-154.74	171	-34.24	10151395	24	6538
dre-miR-2196	c131028_g1_i3	1060	-144.92	159	-23.63	10165571	24	3500
dre-miR-2196	c141137_g6_i3	1061	-138.18	166	-26.75	10164882	24	6749
dre-miR-2196	c143936_g1_i1	1062	-164.88	157	-29.11	10152064	24	9110
dre-miR-727-5p	c142147_g1_i7	1064	-158.56	159	-31.94	9082592	22	18936
dre-miR-2196	c140759_g1_i2	1064	-154.22	167	-27.22	10161996	24	10438
dre-miR-2196	c135413_g3_i7	1065	-166.16	173	-32.2	10146885	24	9104
dre-miR-2196	c135413_g3_i9	1065	-166.16	173	-32.2	10156392	24	9095
dre-miR-2196	c140123_g3_i6	1067	-149.16	165	-32.72	10155257	24	4130
dre-miR-2196	c131227_g1_i1	1068	-170	163	-29.57	10159819	24	3887
dre-miR-2185-5p	c134590_g2_i2	1069	-164.35	160	-28.34	9720331	21	14424
dre-miR-725-3p	c137197_g1_i1	1075	-119.17	168	-21.11	9019481	22	14775
dre-miR-7145	c144165_g1_i3	1076	-121.01	163	-20.44	10617335	22	15603
dre-miR-2196	c140449_g1_i6	1077	-161.62	162	-30.58	10145862	24	6689
dre-miR-2196	c143365_g2_i1	1077	-144.27	158	-26.54	10150183	24	8171
dre-miR-2196	c140449_g1_i4	1077	-161.62	162	-30.58	10163373	24	7520
dre-miR-139-3p	c121917_g1_i1	1082	-184.1	166	-30.22	8738473	23	14866
dre-miR-2193	c134292_g1_i1	1087	-143.56	166	-23.15	10458495	24	5521
dre-miR-34c-5p	c142831_g3_i1	1139	-139.61	145	-21.87	9232033	23	15923
dre-miR-2196	c141626_g1_i2	1140	-175.48	151	-28.48	10159908	24	13230
dre-miR-107b	c127691_g1_i4	1149	-149.1	148	-21.62	10058622	21	6931
dre-miR-107b	c127691_g1_i1	1149	-149.1	148	-21.62	10068819	21	7018
dre-miR-732	c143611_g1_i1	1152	-138.02	149	-19.51	9343203	22	13732
dre-miR-2193	c141298_g1_i3	1152	-145.58	151	-22.6	10459099	24	4272
dre-miR-2193	c141298_g1_i4	1152	-145.58	151	-22.6	10466189	24	4312
dre-miR-34c-5p	c142009_g1_i3	1153	-138.58	153	-20.61	9221433	23	11856
dre-miR-34c-5p	c142009_g1_i7	1153	-138.58	153	-20.61	9225765	23	13089
dre-miR-2196	c140272_g1_i2	1157	-166.83	152	-28.18	10140055	24	6220
dre-miR-2196	c140320_g1_i3	1158	-187.62	154	-26.73	10141647	24	10608
dre-miR-2196	c140320_g1_i8	1158	-187.62	154	-26.73	10154150	24	8547
dre-miR-139-3p	c118007_g1_i1	1159	-192.79	155	-29.62	8759627	23	7024
dre-miR-2188-3p	c140377_g1_i2	1159	-131.66	154	-18.23	10338206	21	5898
dre-miR-139-3p	c143550_g1_i1	1161	-190.63	151	-28.32	8766902	23	7488
dre-miR-2196	c139613_g1_i7	1161	-182.66	149	-34.39	10140342	24	9239
dre-miR-2196	c139613_g1_i1	1161	-182.66	149	-34.39	10147832	24	8454
dre-miR-107b	c143992_g1_i10	1162	-164.39	152	-25.05	10055824	21	17180
dre-miR-2196	c138907_g1_i4	1162	-183.69	156	-28.83	10149564	24	12870
dre-miR-139-3p	c121731_g1_i1	1164	-183.09	156	-29.05	8743825	23	3034
dre-miR-730	c141793_g1_i2	1165	-161.14	164	-25.61	9272538	23	9332
dre-miR-2196	c108946_g1_i1	1165	-190.59	154	-28.85	10144226	24	7459
dre-miR-34c-5p	c141413_g1_i3	1166	-143.3	151	-22.18	9213495	23	7361
dre-miR-7146-3p	c134590_g2_i2	1172	-138.79	160	-19.05	10684338	22	14424
dre-miR-2196	c106029_g1_i1	1173	-170.11	156	-30.61	10168241	24	4833
dre-miR-2196	c91908_g1_i2	1174	-177.79	159	-29.28	10150768	24	6726
dre-miR-2196	c91908_g1_i1	1174	-177.79	159	-29.28	10163797	24	6857
dre-miR-2196	c137088_g1_i1	1175	-168.67	154	-23.97	10142888	24	4450
dre-miR-459-5p	c142088_g1_i2	1177	-147.99	164	-22.87	8281478	22	9730
dre-miR-139-3p	c143674_g1_i4	1177	-206.26	158	-30.62	8748207	23	10637
dre-miR-139-3p	c143674_g1_i7	1177	-206.26	158	-30.62	8759387	23	10610
dre-miR-139-3p	c138966_g2_i3	1177	-210.73	155	-33.33	8768417	23	11737
dre-miR-1788-3p	c142586_g4_i1	1177	-152.9	158	-22.1	9894759	21	12109
dre-miR-7146-3p	c137481_g4_i6	1178	-165.53	155	-24.16	10672553	22	4527
dre-miR-107b	c139264_g1_i1	1179	-128.41	154	-18.89	10071146	21	14411
dre-miR-2196	c140915_g11_i3	1179	-170.93	157	-26.96	10155530	24	5701
dre-miR-34c-5p	c142975_g1_i1	1180	-135.85	160	-21.75	9215656	23	11738
dre-miR-730	c142147_g1_i7	1181	-165.97	163	-24.02	9269174	23	18936
dre-miR-1788-5p	c142147_g1_i7	1182	-141.3	162	-20.92	9860017	22	18936
dre-miR-2196	c134202_g1_i2	1182	-163.86	167	-24.6	10137649	24	4503
dre-miR-2196	c132023_g1_i1	1182	-170.23	162	-25.95	10154411	24	7862
dre-miR-2196	c134202_g1_i3	1182	-163.86	167	-24.6	10164076	24	4294
dre-miR-139-3p	c141393_g2_i1	1183	-207.71	157	-29.48	8740029	23	2666
dre-miR-2196	c136699_g1_i2	1183	-200.47	170	-34.46	10158812	24	9373
dre-miR-139-3p	c108321_g1_i1	1184	-202.5	163	-28.24	8748724	23	4292
dre-miR-730	c142971_g3_i5	1184	-144.28	171	-24	9267828	23	15175
dre-miR-730	c142971_g3_i6	1184	-144.28	171	-24	9280300	23	15274
dre-miR-730	c142971_g3_i4	1184	-144.28	171	-24	9293288	23	15322
dre-miR-34b	c117161_g1_i1	1187	-156.33	160	-25.07	8637728	23	11620
dre-miR-2196	c140044_g3_i3	1187	-167.7	172	-30.03	10138373	24	13083
dre-miR-2196	c140044_g3_i6	1187	-167.7	172	-30.03	10141615	24	12560
dre-miR-2196	c127673_g1_i5	1187	-187.37	157	-28.27	10161157	24	2810
dre-miR-2196	c140044_g3_i10	1187	-167.7	172	-30.03	10164124	24	12533
dre-miR-2193	c140734_g1_i5	1187	-136.5	156	-20.7	10456761	24	5730
dre-miR-2196	c139264_g1_i1	1188	-178.42	157	-28.8	10164437	24	14411
dre-miR-2196	c134809_g1_i1	1189	-180.77	160	-30.83	10162047	24	7786
dre-miR-34c-5p	c141321_g1_i1	1190	-145.34	163	-20.8	9205633	23	16276
dre-miR-2196	c127645_g1_i6	1191	-187.72	164	-31.14	10140411	24	4874
dre-miR-2196	c127645_g1_i3	1191	-187.8	164	-31.14	10141531	24	5572
dre-miR-139-3p	c137875_g4_i3	1194	-203.09	161	-33.65	8751984	23	7634
dre-miR-139-3p	c136950_g1_i3	1194	-221.9	161	-32.79	8758331	23	5449
dre-miR-107b	c141455_g1_i4	1196	-149.28	157	-21.95	10051318	21	7105
dre-miR-725-3p	c133560_g1_i3	1198	-137.64	159	-19.97	9035054	22	14693
dre-miR-2196	c142298_g1_i3	1198	-188.84	163	-28.21	10166595	24	5364
dre-miR-1306	c141411_g1_i4	1198	-203.62	155	-34.39	10855075	22	3807
dre-miR-1306	c141411_g1_i6	1198	-203.62	155	-34.39	10859389	22	3721
dre-miR-1306	c141411_g1_i3	1198	-203.62	155	-34.39	10877356	22	2326
dre-miR-2196	c129840_g1_i5	1199	-180.82	159	-24.65	10160263	24	7066
dre-miR-1306	c131995_g1_i1	1201	-204.55	160	-30.14	10853406	22	12919
dre-miR-1306	c140371_g2_i2	1202	-204.06	162	-34.63	10867241	22	8199
dre-miR-727-3p	c143674_g1_i2	1203	-156.42	170	-28.18	9138665	22	19154
dre-miR-730	c140044_g3_i3	1203	-160.69	162	-23.01	9267657	23	13083
dre-miR-730	c140044_g3_i8	1203	-160.69	162	-23.01	9267712	23	12294
dre-miR-730	c140044_g3_i6	1203	-160.69	162	-23.01	9270899	23	12560
dre-miR-730	c140044_g3_i10	1203	-160.69	162	-23.01	9293408	23	12533
dre-miR-2196	c140361_g1_i2	1203	-172.86	157	-27.72	10144347	24	6542
dre-miR-139-3p	c140562_g1_i1	1204	-211.57	166	-35.08	8748117	23	7019
dre-miR-139-3p	c140562_g1_i3	1204	-211.57	166	-35.08	8754099	23	6846
dre-miR-139-3p	c129910_g1_i1	1204	-204.76	171	-31.85	8766517	23	4592
dre-miR-2193	c135724_g1_i2	1206	-147.7	163	-22.63	10473254	24	7268
dre-miR-139-3p	c135029_g2_i3	1208	-202.79	159	-30.62	8741498	23	9934
dre-miR-139-3p	c135029_g2_i5	1208	-202.79	159	-30.62	8758451	23	10059
dre-miR-2196	c131028_g1_i1	1210	-168.17	159	-23.63	10150014	24	3037
dre-miR-2196	c133328_g1_i1	1211	-161.91	171	-25.31	10139444	24	4829
dre-miR-139-3p	c140044_g3_i3	1224	-200.16	167	-29.85	8739008	23	13083
dre-miR-139-3p	c140044_g3_i8	1224	-200.16	167	-29.85	8739063	23	12294
dre-miR-139-3p	c140044_g3_i6	1224	-200.16	167	-29.85	8742250	23	12560
dre-miR-139-3p	c140044_g3_i10	1224	-200.16	167	-29.85	8764759	23	12533
dre-miR-2196	c141696_g2_i5	1224	-164.61	169	-26.75	10160774	24	8085
dre-miR-2196	c101921_g1_i1	1230	-185.39	161	-35.84	10159395	24	8878
dre-miR-2196	c138782_g1_i1	1232	-176.83	169	-27.29	10144084	24	7139
dre-miR-139-3p	c132484_g1_i8	1288	-205.51	149	-25.8	8761043	23	6736
dre-miR-139-3p	c137177_g1_i1	1300	-221.66	152	-29.58	8763313	23	5871
dre-miR-15c	c126471_g3_i1	1300	-183.32	155	-23.85	9398184	21	7351
dre-miR-15c	c126471_g3_i3	1300	-183.32	155	-23.85	9399836	21	7751
dre-miR-15c	c143266_g1_i6	1300	-161.65	154	-21.44	9408869	21	11489
dre-miR-139-3p	c134590_g2_i2	1301	-229.61	159	-32.32	8756324	23	14424
dre-miR-2196	c138907_g1_i3	1304	-217.44	156	-33.75	10160162	24	12903
dre-miR-2196	c138907_g1_i1	1304	-217.44	156	-33.75	10163710	24	12957
dre-miR-730	c144556_g6_i3	1307	-163.31	154	-22.14	9288755	23	8492
dre-miR-727-3p	c117166_g1_i1	1314	-159.96	151	-22.56	9138925	22	11611
dre-miR-2196	c126335_g1_i3	1314	-203.23	154	-28.82	10157342	24	7866
dre-miR-2196	c126335_g1_i4	1314	-203.23	154	-28.82	10162497	24	7848
dre-miR-34b	c142861_g1_i4	1315	-161.57	162	-21.91	8625907	23	15464
dre-miR-34b	c142861_g1_i2	1315	-161.57	162	-21.91	8642913	23	15416
dre-miR-139-3p	c140167_g1_i2	1315	-238.64	158	-35.29	8742576	23	13004
dre-miR-34b	c126483_g1_i1	1318	-180.91	158	-28.35	8616151	23	8615
dre-miR-139-3p	c132944_g2_i2	1318	-248.29	156	-31.9	8746688	23	7002
dre-miR-2196	c142147_g1_i3	1318	-189.03	154	-24.98	10143361	24	10485
dre-miR-2196	c142147_g1_i5	1318	-189.03	154	-24.98	10153758	24	10554
dre-miR-2196	c140431_g2_i5	1319	-198.19	160	-29.1	10147086	24	8436
dre-miR-2196	c140431_g2_i3	1319	-198.19	160	-29.1	10157589	24	8193
dre-miR-34b	c141035_g1_i2	1322	-194.19	160	-25.45	8620181	23	15922
dre-miR-34b	c141035_g1_i3	1322	-194.19	160	-25.45	8624711	23	15931
dre-miR-34b	c141035_g1_i1	1322	-194.19	160	-25.45	8642923	23	16296
dre-miR-738	c134590_g2_i2	1322	-248.89	154	-32.36	9627040	23	14424
dre-miR-2196	c132376_g1_i1	1327	-202.78	163	-25.61	10162427	24	4293
dre-miR-2196	c140431_g2_i8	1329	-197.82	160	-29.1	10145916	24	7362
dre-miR-2196	c140431_g2_i1	1329	-197.82	160	-29.1	10147564	24	7173
dre-miR-730	c117161_g1_i1	1330	-167	156	-26.52	9290765	23	11620
dre-miR-2196	c139005_g1_i3	1330	-209.96	162	-32.66	10166905	24	6504
dre-miR-139-3p	c143604_g1_i2	1331	-225.61	154	-31.72	8746462	23	6030
dre-miR-7147	c144268_g1_i3	1334	-142.64	161	-17.45	10725740	21	4358
dre-miR-730	c141035_g1_i2	1335	-171.64	162	-27.06	9273218	23	15922
dre-miR-730	c141035_g1_i3	1335	-171.64	162	-27.06	9277748	23	15931
dre-miR-730	c141035_g1_i1	1335	-171.64	162	-27.06	9295960	23	16296
dre-miR-735-5p	c242491_g1_i1	1335	-193.34	155	-24.93	9455630	18	2545
dre-miR-107b	c143674_g1_i2	1335	-184.07	175	-26.04	10071575	21	19154
dre-miR-2196	c126164_g1_i1	1337	-196.26	163	-29.92	10160524	24	7901
dre-miR-139-3p	c142350_g1_i2	1338	-236.35	156	-34.58	8748176	23	7503
dre-miR-139-3p	c142350_g1_i4	1338	-236.35	156	-34.58	8761681	23	7458
dre-miR-139-5p	c46720_g1_i1	1340	-134.31	150	-15.88	8714993	18	1160
dre-miR-2196	c138329_g1_i5	1340	-201.99	157	-26.54	10138421	24	14539
dre-miR-2196	c132063_g1_i2	1345	-200.07	165	-29.36	10151830	24	11216
dre-miR-2196	c132063_g1_i1	1345	-200.07	165	-29.36	10160691	24	11228
dre-miR-2196	c143376_g1_i9	1348	-176.69	162	-24.46	10161300	24	8878
dre-miR-2196	c140361_g1_i3	1350	-196.1	157	-27.72	10164685	24	7847
dre-miR-730	c142786_g1_i3	1352	-178.04	163	-24.56	9277740	23	10709
dre-miR-2193	c142631_g1_i1	1352	-144.72	177	-18.5	10474948	24	11453
dre-miR-1306	c99099_g1_i2	1352	-221.69	162	-33.09	10853478	22	8423
dre-miR-1306	c99099_g1_i1	1352	-221.69	162	-33.09	10883800	22	8348
dre-miR-2196	c140123_g3_i9	1356	-185.82	165	-32.72	10146248	24	10201
dre-miR-2196	c136961_g1_i1	1356	-187.3	161	-25.1	10165917	24	7357
dre-miR-2196	c105929_g1_i1	1359	-202.06	158	-35.26	10160310	24	8453
dre-miR-725-3p	c133560_g1_i2	1360	-154.14	162	-19.97	9041908	22	14202
dre-miR-2196	c136633_g1_i2	1362	-214.16	165	-31.41	10139818	24	2889
dre-miR-139-3p	c138756_g1_i4	1368	-227.53	164	-29.8	8740589	23	7984
dre-miR-139-3p	c138756_g1_i2	1368	-227.53	164	-29.8	8755658	23	8108
dre-miR-139-3p	c138756_g1_i5	1368	-227.53	164	-29.8	8764771	23	8366
dre-miR-1388-3p	c137197_g1_i1	1369	-188.74	163	-24.74	9828003	22	14775
dre-miR-2196	c140431_g1_i8	1370	-194.52	164	-24.91	10161645	24	3330
dre-miR-7149-5p	c134323_g1_i2	1386	-171.79	167	-24.48	10815589	21	1916
dre-miR-139-3p	c140123_g1_i2	1400	-242.12	177	-34.78	8768057	23	4513
dre-miR-2196	c129183_g1_i1	1402	-187.03	164	-27.08	10138326	24	4793
dre-miR-139-3p	c132484_g1_i2	1438	-232.08	150	-26.57	8747707	23	6784
dre-miR-735-5p	c137481_g5_i3	1447	-212.94	147	-24.91	9483619	18	5688
dre-miR-2196	c138419_g3_i2	1448	-205.69	153	-25.85	10154633	24	8521
dre-miR-139-3p	c134730_g1_i3	1450	-246.55	151	-38.42	8738651	23	8703
dre-miR-139-3p	c134730_g1_i4	1450	-246.55	151	-38.42	8749228	23	8489
dre-miR-735-5p	c137481_g5_i4	1450	-205.67	147	-24.95	9480406	18	5436
dre-miR-139-3p	c142586_g3_i10	1459	-263.72	164	-36.12	8742783	23	11052
dre-miR-2196	c141035_g1_i2	1460	-229.56	153	-27.83	10143934	24	15922
dre-miR-2196	c141035_g1_i1	1460	-229.56	153	-27.83	10166676	24	16296
dre-miR-1306	c139264_g1_i1	1463	-190.9	160	-27.22	10879668	22	14411
dre-miR-1388-3p	c141035_g1_i2	1466	-213.87	154	-25.95	9832964	22	15922
dre-miR-1388-3p	c141035_g1_i3	1466	-213.87	154	-25.95	9837494	22	15931
dre-miR-1388-3p	c141035_g1_i1	1466	-213.87	154	-25.95	9855706	22	16296
dre-miR-1788-5p	c143992_g1_i3	1479	-175.69	166	-21.2	9863889	22	16666
dre-miR-2196	c141321_g1_i1	1480	-243.58	162	-30.12	10138543	24	16276
dre-miR-139-3p	c142350_g1_i6	1485	-259.2	156	-34.58	8748282	23	7611
dre-miR-139-3p	c142350_g1_i1	1485	-259.2	156	-34.58	8755253	23	7999
dre-miR-139-3p	c142350_g1_i5	1485	-259.2	156	-34.58	8759195	23	7656
dre-miR-2196	c136919_g1_i2	1485	-237.87	162	-30.03	10142756	24	7336
dre-miR-2196	c136919_g1_i1	1485	-237.87	162	-30.03	10142831	24	7310
dre-miR-139-3p	c139201_g1_i2	1487	-255.05	161	-29.17	8742870	23	10577
dre-miR-139-3p	c139201_g1_i4	1487	-255.05	161	-29.17	8755931	23	10859
dre-miR-725-3p	c144161_g1_i4	1495	-179.17	160	-24.91	9042693	22	14716
dre-miR-2196	c143611_g1_i1	1509	-221.39	168	-29.16	10151725	24	13732
dre-miR-2196	c121841_g1_i1	1510	-212.51	157	-24.3	10151431	24	5116
dre-miR-2196	c138377_g1_i4	1510	-218.3	161	-25.45	10157707	24	5782
dre-miR-2196	c133808_g1_i1	1515	-220.18	167	-29.45	10146902	24	4825
dre-miR-2196	c129117_g1_i3	1523	-234.17	174	-28.8	10145356	24	8307
dre-miR-2196	c129117_g1_i1	1523	-234.17	174	-28.8	10158876	24	7172
dre-miR-2196	c129183_g1_i2	1542	-203	164	-27.08	10139242	24	4820
dre-miR-2196	c143992_g2_i1	1590	-221.46	156	-30.57	10150498	24	12600
dre-miR-139-3p	c137464_g1_i1	1592	-240.57	154	-27.71	8752594	23	5480
dre-miR-2196	c141035_g1_i3	1609	-248.92	153	-27.83	10148464	24	15931
dre-miR-139-3p	c136968_g5_i2	1616	-278.99	157	-30.61	8744644	23	9053
dre-miR-2196	c138397_g1_i7	1626	-253.95	166	-29.8	10152615	24	9853
dre-miR-139-3p	c140969_g1_i3	1628	-269.26	165	-29.69	8739390	23	12599
dre-miR-139-3p	c140969_g1_i1	1628	-269.26	165	-29.69	8757291	23	12425
dre-miR-2196	c128257_g1_i1	1661	-254.91	170	-28.87	10166946	24	3647
dre-miR-2196	c140899_g1_i3	1665	-258.6	163	-29.41	10141736	24	5212
dre-miR-2196	c140899_g1_i6	1665	-258.6	163	-29.41	10146894	24	5560
dre-miR-2196	c140899_g1_i1	1665	-258.6	163	-29.41	10160004	24	5194
dre-miR-2196	c129117_g1_i5	1672	-250.41	174	-28.8	10146125	24	7317
dre-miR-139-3p	c142808_g2_i8	1732	-297.3	152	-31	8744883	23	13201
dre-miR-2196	c140969_g1_i3	1774	-245.75	162	-27.85	10138755	24	12599
dre-miR-2196	c140969_g1_i1	1774	-245.75	162	-27.85	10156656	24	12425
dre-miR-2196	c142875_g1_i2	1777	-258.08	167	-28.94	10150130	24	11568
dre-miR-730	c121917_g1_i1	1794	-226.35	161	-24.07	9267122	23	14866
dre-miR-1306	c139530_g3_i6	1794	-292.26	157	-30.73	10881054	22	6318
dre-miR-2196	c140069_g1_i2	1859	-293.18	172	-32.61	10161373	24	9658
dre-miR-139-3p	c129018_g1_i1	1887	-346.18	157	-30.77	8746023	23	7381
dre-miR-139-3p	c141321_g1_i1	1891	-317.72	153	-27.61	8739178	23	16276
dre-miR-139-3p	c136968_g5_i3	1906	-336.97	157	-30.9	8753563	23	10003
dre-miR-2196	c142222_g5_i3	1909	-266.22	152	-24.15	10168048	24	10584
dre-miR-2196	c132798_g1_i4	1920	-279.52	162	-28.83	10147370	24	2659
dre-miR-139-3p	c130431_g2_i2	1923	-334.96	155	-33.12	8742475	23	6261
dre-miR-15c	c139264_g1_i1	1924	-259.89	161	-23.95	9418109	21	14411
dre-miR-139-3p	c143674_g1_i2	2061	-351.75	158	-30.62	8765501	23	19154
dre-miR-2196	c142875_g1_i3	2211	-330.4	167	-28.94	10158259	24	14551
dre-miR-2196	c143992_g1_i3	2224	-317.15	156	-26.82	10143762	24	16666
dre-miR-2196	c132798_g1_i3	2248	-334.8	162	-28.83	10146139	24	3606
dre-miR-2196	c135608_g1_i1	2248	-281.97	162	-25.88	10157465	24	8447
dre-miR-2188-5p	c137481_g4_i5	2355	-280.4	163	-20.9	10310388	21	5657
dre-miR-2188-5p	c137481_g4_i7	2355	-280.4	163	-20.9	10323598	21	5449
dre-miR-2196	c132798_g1_i1	2389	-355.27	162	-28.83	10167728	24	3833
dre-miR-2196	c132897_g1_i1	2400	-326.45	175	-27.02	10152561	24	8280
dre-miR-2188-5p	c137481_g4_i1	2497	-295.58	155	-23.15	10311166	21	5643
dre-miR-2196	c133560_g1_i3	2515	-377.53	161	-27.66	10154546	24	14693
dre-miR-2196	c133560_g1_i2	2515	-377.53	161	-27.66	10161400	24	14202
dre-miR-2196	c142147_g1_i7	2647	-381.82	164	-29.92	10139890	24	18936
dre-miR-2188-5p	c137481_g4_i4	2655	-312.34	155	-23.15	10316755	21	5621
dre-miR-2196	c143992_g1_i10	2827	-412.86	165	-28.88	10149115	24	17180
dre-miR-2188-5p	c137481_g4_i6	2933	-341.53	163	-20.9	10299389	21	4527
ccr-miR-10d	c140568_g1_i3	1001	-120.44	147	-18.68	425381	22	6847
ccr-miR-24	c140759_g1_i2	1003	-128.75	146	-22.64	2823104	22	10438
ccr-miR-205	c141035_g1_i2	1004	-141.53	149	-28.45	2307490	22	15922
ccr-miR-205	c141035_g1_i3	1004	-141.53	149	-28.45	2312020	22	15931
ccr-miR-205	c141035_g1_i1	1004	-141.53	149	-28.45	2330232	22	16296
ccr-miR-34	c142009_g1_i3	1004	-131.89	155	-23.09	3219712	22	11856
ccr-miR-34	c142009_g1_i7	1004	-131.89	155	-23.09	3224044	22	13089
ccr-miR-16a	c139750_g1_i3	1005	-109.76	150	-19.55	1377262	22	8880
ccr-miR-22b	c121650_g1_i2	1006	-133.41	152	-26.62	2726575	22	4828
ccr-miR-138	c139264_g1_i1	1007	-134.14	152	-23.4	928628	21	14411
ccr-miR-730	c132897_g1_i1	1008	-121.08	151	-21.57	3995355	22	8280
ccr-miR-7132	c130137_g2_i1	1008	-118.94	152	-20.13	4471996	21	3916
ccr-miR-7132	c130137_g2_i5	1008	-118.94	152	-20.13	4474526	21	3848
ccr-miR-103	c127691_g1_i4	1009	-133.32	148	-22.19	294164	23	6931
ccr-miR-103	c127691_g1_i1	1009	-133.32	148	-22.19	304361	23	7018
ccr-miR-133a-3p	c141615_g3_i2	1009	-128.17	152	-22.57	835945	22	6386
ccr-miR-16a	c139642_g4_i2	1009	-108.29	147	-18.27	1383012	22	1039
ccr-miR-16b	c139642_g4_i2	1009	-112.48	147	-17.48	1414109	22	1039
ccr-miR-2192	c141321_g1_i1	1010	-118.95	147	-19.02	4323404	21	16276
ccr-let-7j	c133592_g1_i3	1011	-123.89	158	-21.39	136333	22	8463
ccr-let-7j	c133592_g1_i2	1011	-123.89	158	-21.39	143983	22	8677
ccr-miR-128	c142975_g1_i1	1011	-124.58	156	-22.15	601787	21	11738
ccr-miR-183	c140509_g2_i3	1011	-134.5	152	-21.83	1686397	23	9876
ccr-miR-183	c140509_g2_i6	1011	-134.5	152	-21.83	1687790	23	9968
ccr-miR-184	c133834_g1_i1	1011	-151.76	149	-25.33	1719796	22	9066
ccr-miR-20a-3p	c124489_g1_i3	1012	-140.43	153	-22.47	2398501	23	3410
ccr-miR-20a-3p	c141626_g1_i2	1012	-123.56	155	-20.25	2416755	23	13230
ccr-miR-214	c142586_g3_i10	1012	-137.91	153	-28.13	2492286	19	11052
ccr-miR-139	c143936_g1_i1	1013	-131.53	148	-23.52	947352	23	9110
ccr-miR-15a	c141035_g1_i2	1013	-122.5	149	-20.7	1219095	21	15922
ccr-miR-15a	c141035_g1_i3	1013	-122.5	149	-20.7	1223625	21	15931
ccr-miR-15a	c134476_g1_i2	1013	-139.52	151	-27.49	1224806	21	7446
ccr-miR-15a	c141035_g1_i1	1013	-122.5	149	-20.7	1241837	21	16296
ccr-miR-20a-3p	c140951_g1_i4	1013	-139.91	160	-25.32	2401071	23	8223
ccr-miR-214	c138811_g1_i5	1013	-129.1	151	-21.61	2505976	19	10293
ccr-miR-9-3p	c136987_g1_i1	1013	-120.97	152	-21.64	4131815	22	7834
ccr-miR-17-3p	c138329_g1_i5	1014	-136.52	150	-26.23	1493455	23	14539
ccr-miR-194	c144161_g1_i4	1014	-135.72	149	-22.43	1983674	22	14716
ccr-miR-129	c137197_g1_i1	1015	-142.05	149	-24.95	623291	21	14775
ccr-miR-15a	c133681_g1_i1	1015	-119.78	149	-22.95	1232251	21	5607
ccr-miR-17-3p	c137088_g1_i1	1015	-125.62	157	-21.3	1497922	23	4450
ccr-miR-20a-3p	c137197_g1_i1	1015	-123.31	156	-23.69	2395820	23	14775
ccr-miR-20a-3p	c142786_g1_i3	1015	-114.04	150	-20.88	2405303	23	10709
ccr-miR-214	c129308_g1_i1	1015	-130.76	151	-22.9	2493106	19	6641
ccr-miR-214	c129308_g1_i2	1015	-130.76	151	-22.9	2506411	19	6564
ccr-miR-24	c133740_g1_i1	1015	-147.89	157	-25.05	2814769	22	7853
ccr-miR-489	c141977_g6_i8	1016	-130.91	151	-23.12	3714265	22	6462
ccr-miR-24	c137700_g1_i3	1017	-140.63	155	-21.99	2824204	22	6278
ccr-let-7i	c141035_g1_i2	1018	-146.84	152	-28.21	99603	21	15922
ccr-let-7i	c141035_g1_i3	1018	-146.84	152	-28.21	104133	21	15931
ccr-let-7i	c141035_g1_i1	1018	-146.84	152	-28.21	122345	21	16296
ccr-miR-103	c143992_g1_i3	1019	-139.57	152	-25.35	286013	23	16666
ccr-miR-16c	c138759_g1_i3	1019	-117.99	150	-20.79	1452431	21	8028
ccr-miR-183	c142378_g1_i3	1019	-121.23	157	-21.13	1695148	23	14655
ccr-miR-183	c142378_g1_i8	1019	-121.23	157	-21.13	1700696	23	14547
ccr-miR-20a-3p	c138368_g1_i4	1019	-137.95	158	-24.32	2401149	23	8589
ccr-miR-24	c140069_g1_i2	1019	-141.03	155	-23.42	2822481	22	9658
ccr-miR-34	c141035_g1_i2	1019	-147.74	155	-24.78	3209303	22	15922
ccr-miR-34	c141035_g1_i3	1019	-147.74	155	-24.78	3213833	22	15931
ccr-miR-34	c141035_g1_i1	1019	-147.74	155	-24.78	3232045	22	16296
ccr-miR-489	c142234_g4_i5	1019	-134.19	157	-21.59	3720528	22	7619
ccr-miR-730	c144556_g6_i3	1019	-132.1	154	-22.85	4002265	22	8492
ccr-miR-7a	c123195_g2_i2	1019	-110.7	154	-18.48	4054111	24	5342
ccr-miR-7a	c130488_g1_i2	1019	-127.18	152	-21.79	4056178	24	5010
ccr-miR-7a	c130488_g1_i3	1019	-127.18	152	-21.79	4057522	24	5184
ccr-miR-2192	c143674_g1_i2	1019	-130.57	154	-24.2	4349727	21	19154
ccr-miR-203b-5p	c136699_g1_i2	1020	-119.68	153	-20.3	2260174	23	9373
ccr-miR-9-3p	c142147_g1_i7	1020	-116.48	164	-19.94	4107072	22	18936
ccr-miR-138	c144103_g5_i3	1021	-127.19	153	-21.25	926903	21	15607
ccr-miR-138	c141666_g1_i2	1021	-128.59	155	-21.25	931914	21	6328
ccr-miR-17-3p	c142736_g1_i4	1021	-142.55	155	-25.64	1521271	23	6245
ccr-miR-20a-3p	c144724_g1_i1	1021	-128.29	156	-19.95	2399032	23	10291
ccr-miR-20a-3p	c144103_g5_i3	1021	-128.89	151	-24.06	2419559	23	15607
ccr-miR-16a	c137481_g4_i4	1022	-126.64	150	-21.99	1391916	22	5621
ccr-miR-16b	c137481_g4_i4	1022	-129.62	150	-22.22	1423013	22	5621
ccr-miR-16b	c144161_g1_i4	1022	-116.54	154	-19.38	1423928	22	14716
ccr-miR-214	c142219_g2_i3	1022	-137.55	152	-26.53	2513694	19	9097
ccr-miR-24	c133547_g3_i2	1022	-142.73	158	-24.52	2801927	22	8226
ccr-miR-205	c132831_g1_i3	1023	-145.61	163	-27.46	2305235	22	4641
ccr-miR-205	c132831_g1_i1	1023	-145.61	163	-27.46	2309098	22	4509
ccr-miR-205	c132831_g1_i2	1023	-145.61	163	-27.46	2320083	22	4653
ccr-miR-20a-3p	c133834_g1_i1	1023	-142.64	159	-23.3	2403930	23	9066
ccr-miR-217	c134590_g2_i2	1023	-154.59	153	-25.45	2536924	23	14424
ccr-miR-7a	c139484_g12_i3	1023	-121.91	160	-21.86	4058313	24	10146
ccr-miR-7132	c144660_g1_i3	1023	-125.14	154	-19.52	4475572	21	7417
ccr-miR-15a	c135850_g1_i4	1024	-119.39	160	-23.14	1230430	21	3736
ccr-miR-16b	c132848_g1_i3	1024	-120.85	150	-23.37	1416708	22	6400
ccr-miR-21	c138907_g1_i4	1024	-132.04	158	-21.98	2437508	23	12870
ccr-miR-21	c138907_g1_i3	1024	-132.04	158	-21.98	2448106	23	12903
ccr-miR-21	c138907_g1_i1	1024	-132.04	158	-21.98	2451654	23	12957
ccr-miR-34	c141413_g1_i3	1024	-148.55	162	-31.84	3211774	22	7361
ccr-miR-34	c141413_g1_i1	1024	-148.55	162	-31.84	3232293	22	6575
ccr-miR-7132	c140176_g7_i11	1024	-132.06	158	-21.58	4454533	21	6260
ccr-miR-7132	c140176_g7_i2	1024	-132.06	158	-21.58	4464997	21	5791
ccr-miR-7132	c140176_g7_i6	1024	-132.06	158	-21.58	4477088	21	6194
ccr-miR-139	c138368_g1_i4	1025	-131.72	152	-25.05	939590	23	8589
ccr-miR-139	c141626_g1_i5	1025	-131.12	150	-25.41	946192	23	11651
ccr-miR-16c	c138260_g3_i6	1025	-111.07	154	-19.22	1437345	21	10308
ccr-miR-16c	c138260_g3_i7	1025	-111.07	154	-19.22	1459749	21	10216
ccr-miR-17-3p	c140626_g2_i2	1025	-155.32	157	-25.79	1493303	23	9032
ccr-miR-27d	c132034_g1_i1	1025	-130.8	157	-22.7	2985911	21	5919
ccr-miR-7132	c126471_g3_i1	1025	-138.22	158	-24.05	4453761	21	7351
ccr-miR-7132	c126471_g3_i3	1025	-138.22	158	-24.05	4455413	21	7751
ccr-miR-125c	c138907_g1_i4	1026	-158.14	155	-27.17	509494	22	12870
ccr-miR-125c	c138907_g1_i3	1026	-158.14	155	-27.17	520092	22	12903
ccr-miR-125c	c138907_g1_i1	1026	-158.14	155	-27.17	523640	22	12957
ccr-miR-16a	c135971_g1_i4	1026	-120.4	154	-19.25	1389912	22	5855
ccr-miR-16b	c140855_g2_i16	1026	-131.35	156	-23.65	1410735	22	10189
ccr-miR-16b	c115810_g1_i3	1026	-120.07	151	-20.44	1428851	22	9257
ccr-miR-214	c142861_g1_i4	1026	-133.12	155	-24.47	2499798	19	15464
ccr-miR-214	c142861_g1_i2	1026	-133.12	155	-24.47	2516804	19	15416
ccr-miR-489	c138399_g4_i4	1026	-127.17	155	-23.48	3703725	22	4151
ccr-miR-107	c141035_g1_i2	1027	-123.79	156	-21.94	317282	22	15922
ccr-miR-107	c141035_g1_i3	1027	-123.79	156	-21.94	321812	22	15931
ccr-miR-107	c141035_g1_i1	1027	-123.79	156	-21.94	340024	22	16296
ccr-miR-20a-3p	c140123_g3_i9	1027	-127.31	157	-20.61	2403095	23	10201
ccr-miR-20a-3p	c142875_g1_i2	1027	-131.86	158	-24.22	2406977	23	11568
ccr-miR-214	c140069_g1_i2	1027	-116.99	152	-19.48	2511511	19	9658
ccr-miR-338	c117161_g1_i1	1027	-116.42	155	-20.81	3195753	22	11620
ccr-miR-15b	c140167_g1_i2	1028	-114.32	155	-19.9	1341490	21	13004
ccr-miR-214	c143674_g1_i2	1028	-130.72	159	-25.02	2515004	19	19154
ccr-miR-725	c131615_g1_i2	1028	-119.93	152	-20.24	3852404	22	5974
ccr-miR-7132	c142586_g4_i1	1028	-125.37	157	-23	4452784	21	12109
ccr-miR-103	c141035_g1_i2	1029	-123.96	156	-21.62	286185	23	15922
ccr-miR-103	c141035_g1_i3	1029	-123.96	156	-21.62	290715	23	15931
ccr-miR-103	c141035_g1_i1	1029	-123.96	156	-21.62	308927	23	16296
ccr-miR-107	c48353_g1_i1	1029	-119.15	157	-20.44	326775	22	2727
ccr-miR-199-5p	c144161_g1_i4	1029	-146.71	160	-32.81	2076965	23	14716
ccr-miR-132b	c138334_g1_i3	1029	-136.03	159	-22.91	4393252	22	8548
ccr-miR-16b	c139145_g3_i2	1030	-115.78	155	-20.96	1400911	22	10090
ccr-miR-16b	c140315_g2_i2	1030	-118.42	164	-19.49	1402565	22	5388
[truncated: 6,260 more rows]

## Sheet: IGA(LIV) vs. PSR(LIV)
Supplementary file 6: MiRNA targets identified from BPGL differential expressed genes
[truncated: 5,909 more rows]
